# Supplementary material for: Synergistic stabilization of microtubules by BUB-1, HCP-1, and CLS-2 controls microtubule pausing and meiotic spindle assembly
Source: eLife journal article supplement (doi:10.7554/elife.82579), 2023-02-17
Supplement: fig2-figsupp1-data2 [file Figure 2_Figure supplement 1_source data 2_Panel C source data.pdf › Figure 2—figure supplement 1—source data 2/Figure 2_Figure supplement 1_source data 2_Panel C source data.pdf]

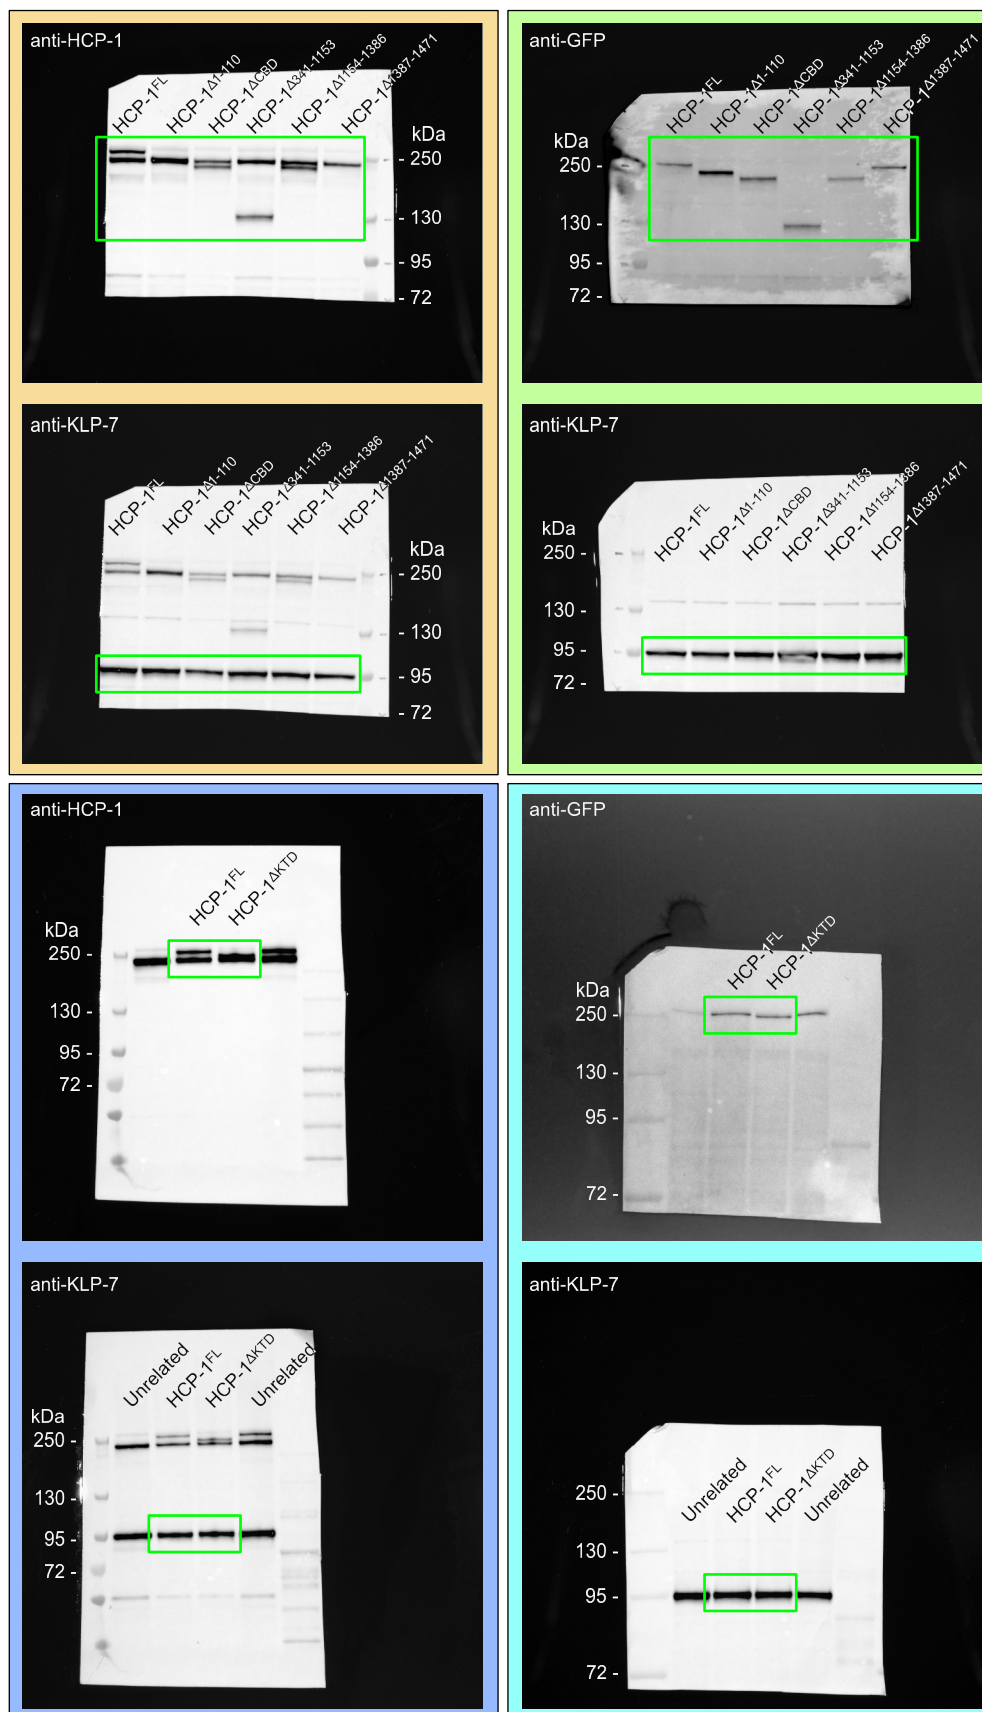

**Figure 2 – Figure supplement 1 – source data 2 – Panel C source data**

Uncropped images of Western blots of full-protein worm extracts (50 worms per sample) to detect indicated transgenes specifically (anti-GFP) or both the transgene and endogenous HCP-1 (anti-HCP-1), as well as controls (anti-KLP-7). Bands of interest are indicated with a green box. Colored frameworks indicate the same membrane. Molecular weight ladder, Thermofisher prestained PageRuler.
