# Supplementary material for: Synergistic stabilization of microtubules by BUB-1, HCP-1, and CLS-2 controls microtubule pausing and meiotic spindle assembly
Source: eLife journal article supplement (doi:10.7554/elife.82579), 2023-02-17
Supplement: fig5-figsupp1-data1 [file Figure 5 – Figure supplement 1 – source data 1 - Panel D source data_IMAGES.pdf › Figure 5—figure supplement 1—source data 1/Figure 5 – Figure supplement 1 – source data 1 - Panel D source data_IMAGES.pdf]

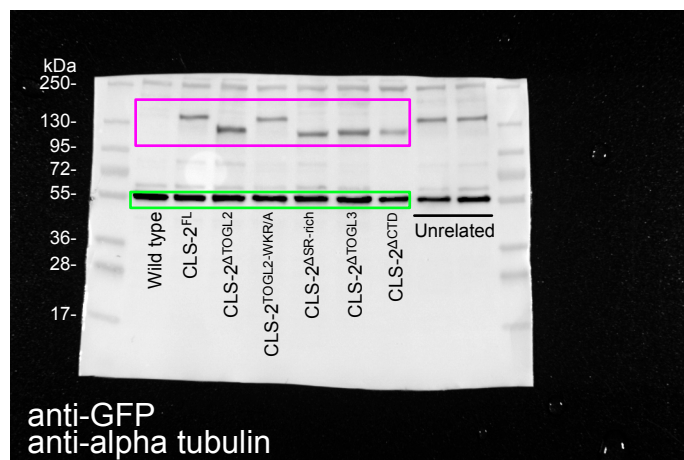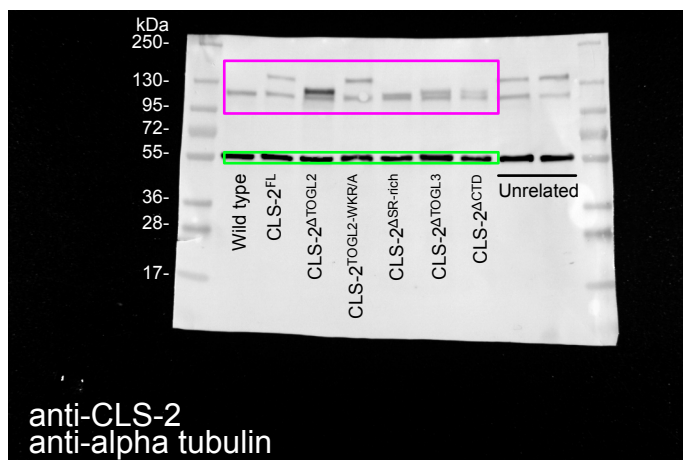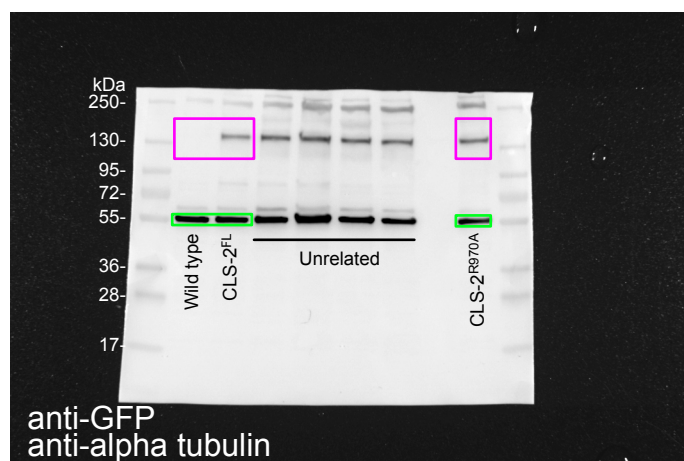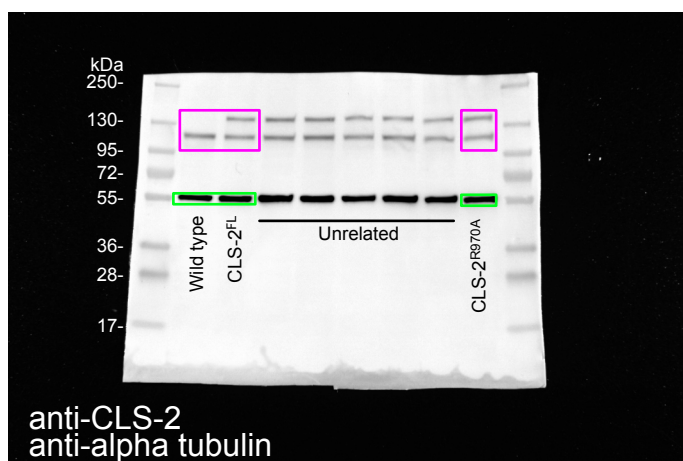

**Figure 5 - Figure supplement 1 - source data 1 - Panel D source data.** Uncropped images of Western Blots of transgenic worm full-protein extracts (100 worms per sample). Bands of interest are shown in magenta boxes, controls in green boxes. Molecular weight ladder, Thermofischer Prestain PageRuler .
