# Supplementary material for: Synergistic stabilization of microtubules by BUB-1, HCP-1, and CLS-2 controls microtubule pausing and meiotic spindle assembly
Source: eLife journal article supplement (doi:10.7554/elife.82579), 2023-02-17
Supplement: fig6-figsupp1-data1 [file Figure 6_Figure supplement 1_Source data 1_Panel A-B source data.pdf › Figure 6—figure supplement 1—source data 1/Figure 6_Figure supplement 1_Source data 1_Panel A-B source data.pdf]

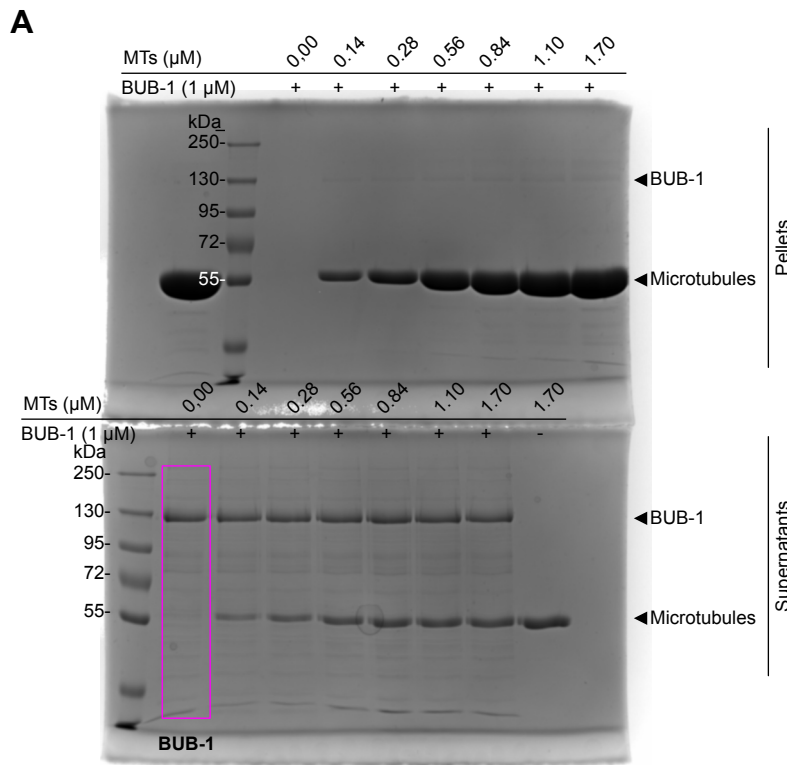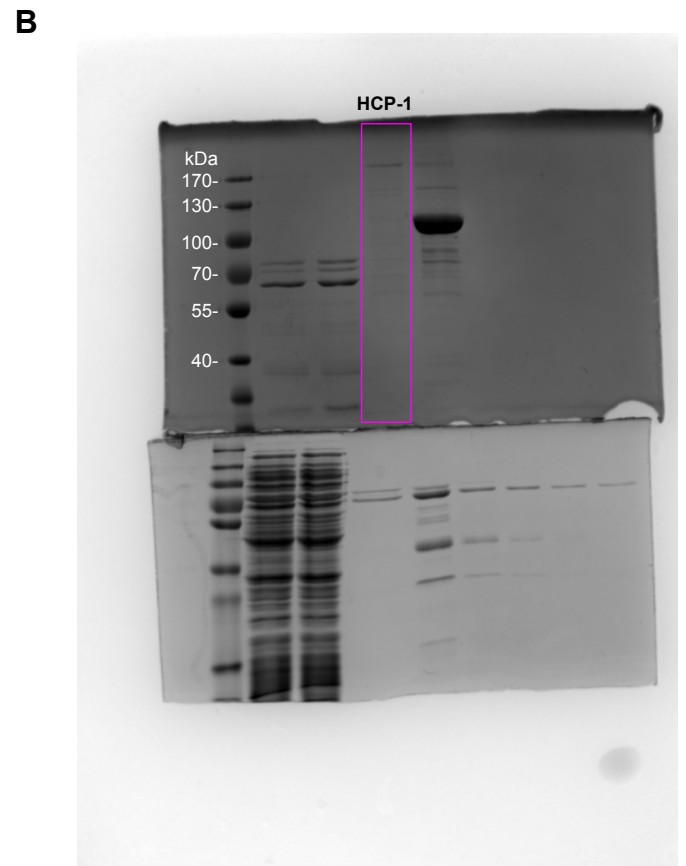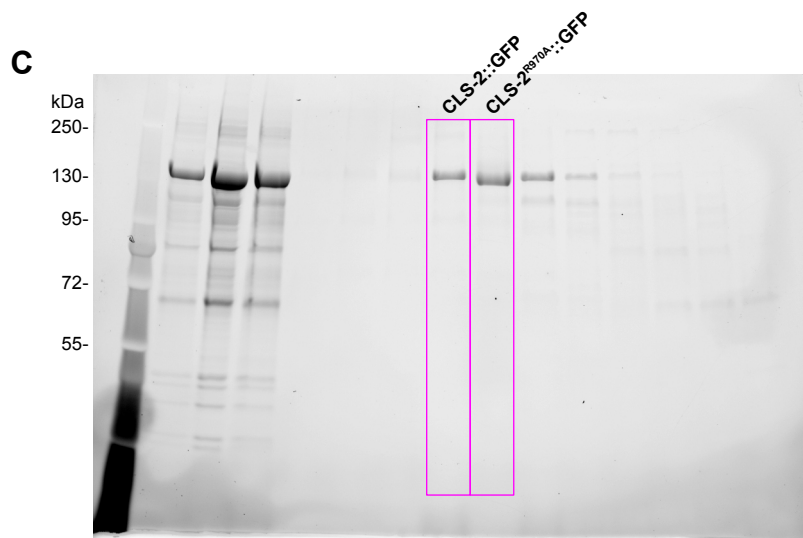

**Figure 6 - Figure supplement 1 - Source data 1 - Panel A, B source data.**

(A) Uncropped coomassie-stained gel of purified BUB-1 (magenta box), and microtubule pelleting assay. Presence (+) or absence (-) of 1 μM purified BUB-1 is shown, as well as the concentration of microtubules (MTs, μM). (B, C) Uncropped Coomassie-stained gels of purified HCP-1 (B), CLS-2::GFP and CLS-2<sup>R970A</sup>::GFP (C) (lane of interest in magenta box). Prestained protein size ladders, Thermofisher (A, C) and Euromedex (B).
