# Supplementary material for: Synergistic stabilization of microtubules by BUB-1, HCP-1, and CLS-2 controls microtubule pausing and meiotic spindle assembly
Source: eLife. 2023 Feb 17;12:e82579. doi: 10.7554/eLife.82579 (PMC10005782; doi:10.7554/eLife.82579)
Supplement: Figure 1—figure supplement 1—source data 2. — Signal measurements on western blots, performed in Fiji. Simple linear regression was performed using GraphPad Prism. [file elife-82579-fig1-figsupp1-data2.xlsx]

## Sheet: WB signal measurements
Area tub=114x30 px / area bub1=106x30
Pixel density of 8bits image=255					INVERTED PIXEL DENSITY		(255-MEAN)
TUBULIN		SIGNAL	NOISE		number of worms	Gel Well	Tubulin Signal	Tubulin Noise	BUB-1 Signal	BUB-1 Noise
number of worms	Gel Well	MEAN	MEAN		50	1	172.7	52.2	216.1	43.1
50	1	82.3	202.8		25	2	100.6	36.2	169	23.1
25	2	154.4	218.8		12.5	3	48.8	32.7	134.9	17.7
12.5	3	206.2	222.3		6.25	4	36.5	29.5	122.1	17.2
6.25	4	218.5	225.5		3.125	5	30.8	30.1	38.8	11.6
3.125	5	224.2	224.9		50	7	173.7	47.7	111.6	17.2
50	7	81.3	207.3
BUB-1		SIGNAL	NOISE		NET SIGNAL VALUE		(INVERTED SIGNAL DENSITY-INVERTED NOISE DENSITY)
number of worms	Gel Well	MEAN	MEAN		number of worms	Gel Well	Tubulin	BUB-1
50	1	38.9	211.9		50	1	120.5	173
25	2	86	231.9		25	2	64.4	145.9
12.5	3	120.1	237.3		12.5	3	16.1	117.2
6.25	4	132.9	237.8		6.25	4	7	104.9
3.125	5	216.2	243.4		3.125	5	0.7	27.2
50	7	143.4	237.8		50	7	126	94.4
					RELATIVE SIGNAL		NET Signal BUB-1/ NET Signal tubulin
					number of worms	Gel Well
					50	1	1.43568
					25	2	2.26553
					12.5	3	7.2795
					6.25	4	14.9857
					3.125	5	38.8571
					50	7	0.749206
