# Supplementary material for: Synergistic stabilization of microtubules by BUB-1, HCP-1, and CLS-2 controls microtubule pausing and meiotic spindle assembly
Source: eLife. 2023 Feb 17;12:e82579. doi: 10.7554/eLife.82579 (PMC10005782; doi:10.7554/eLife.82579)
Supplement: Figure 1—figure supplement 1—source data 3. — Quantification of CLS-2 signal at kinetochores in bub-3(ok3437) mutants (bub-3∆) compared to wild type N2 controls. Signals were measured in Fiji from immunolocalized proteins. Details of statistical analyses are provided. [file elife-82579-fig1-figsupp1-data3.xlsx]

## Sheet: Raw data
N2 control
RAW int INTENSITY channel 4 - CLS-2 signal
		image name:	N2_dm1_bub1_cls2_NM_20220525_02						N2_dm1_bub1_cls2_NM_20220525_05					N2_dm1_bub1_cls2_NM_20220525_07			N2_dm1_bub1_cls2_NM_20220525_09						N2_dm1_bub1_cls2_NM_20220525_11					N2_dm1_bub1_cls2_NM_20220525_15
		MEASURED SAMPLE # (measurable chromosome)	1	2	3	4	5	6	1	2	3	4	5	1	2	3	1	2	3	4	5	6	1	2	3	4	5	1	2	3	4
		Line Scan coordinates (ROI)	0089-0557-0254	0077-0571-0265	0084-0578-0293	0104-0576-0284	0104-0583-0265	0077-0582-0245	0125-0555)0495	0112-0544-0510	0100-0559-0536	0135-0557-0517	0092-0545-0526	0071-0589-0474	0077-0585-0514	0081-0586-0494	0079-0580-0476	0080-0568-0488	0104-0588-0483	0104-0571-0498	0124-0594-0468	0124-0576-0483	0163-0571-0356	0181-0554-0366	0181-0580-0369	0205-0547-0357	0215-0564-0361	0085-0494-0406	0097-0514-0421	0113-0488-0402	0116-0497-0418
	Distance relative to ring Max int (µm)	-1.548		1122.47		1969.53		1747.34	1410.96		2400.81				916.86						1186.66	1176.48
		-1.4835		1104.85	1085.7	2193.13	1141.96	1795.09	1471.29	1894.81	2198.6	1473.61	1359.24	1870.61	944.54	889.53	1817.26	1515.33		1769.52	1229.67	1240.16		1443.43	1053.51	1374.35	1014.38		766.38	1280.19	1889.11
		-1.419	1098.68	1203.83	1112.97	2315.73	1185.43	1736.34	1585.99	2067.41	1875	1511.58	1430.63	2076.32	957.95	934.4	1885.39	1659.59	2085.62	1892.97	1336.65	1327.47	898.46	1555.08	1101.08	1384.04	1051.44		791.88	1291.4	1870.23
		-1.3545	1056.19	1326.83	1079.32	2263.74	1362.61	1749.75	1620.31	2553	1538.58	1586.86	1529.23	2195.1	1034.06	1004.33	1946.76	1852.03	2264.5	1895.18	1387.4	1462.38	925.16	1652.81	1101.01	1370.17	1085.76	1269.68	792.23	1404.13	1792.62
		-1.29	1037.12	1419.31	1084.82	2181.14	1635.88	1868.45	1860.86	2969.28	1416.5	1715.32	1759.45	2232.87	1137.07	1055.95	2057.74	2166.18	2605.92	2031.8	1564.54	1700.95	1025.8	1834.26	1167.4	1416.67	1182.1	1287.15	857.99	1545.4	1692
		-1.2255	1044.24	1550.38	1053.5	2096.16	2003.8	2081.57	2168.46	3316.05	1456.04	1946.6	2005.81	2392.66	1407.28	1143.12	2097.52	2401.03	2989.9	2231.38	1728.82	1953.5	1148.39	2045.45	1251.63	1578.08	1271.28	1316.53	989.29	1826.49	1685.86
		-1.161	1078.42	1691.28	1026.86	2005.73	2339.87	2564.53	2618.33	3419.57	1764.88	2257.81	2302.34	2639.14	1835.82	1240.95	2090.35	2511.96	3264.58	2470.87	1895.75	2182.27	1384.45	2316.62	1476.53	1738.05	1366.74	1351.51	1241.96	2192.07	1781.1
		-1.0965	1134.2	1891.06	1179.83	2188.9	2603.13	3033.86	3216.66	3444.22	2261.53	2623.14	2610.77	2996.33	2367.5	1507.63	2258.18	2425.04	3589.79	2832.41	2026.42	2390.64	1691.77	2525.13	1947.83	1976.12	1493.07	1435.85	1508.99	2383.33	1818.4
		-1.032	1240.44	2170.77	1509.68	2485.18	2602.93	3106.88	3666.76	3334.99	2995.93	2978.67	2908.48	3273.15	2760.54	1927.34	2483.85	2427.04	3766.52	3205.95	2214.34	2540.92	1919.24	2539.58	2358.64	2186.68	1665.69	1524.3	1827.22	2429.96	1936.06
		-0.9675	1425.16	2475.34	2029.8	3022.72	2405.33	2837.19	3703.54	3048.44	3839.88	3307.38	3019.3	3554.57	3070.93	2361	2787.69	2390.96	3850.11	3488.36	2293.54	2635.97	2060.22	2502.88	2683.83	2287.46	1889.79	1700.06	1985.66	2380.64	2019.38
		-0.903	1837.58	2722.59	2531.3	3737.83	2254	2429.88	3344.82	2898.66	4108.9	3602.37	2883.47	3569.15	2921.47	2658.38	2967.46	2320.25	3759.11	3680.73	2343.94	2639.29	2033.12	2335.98	2790.78	2383.01	2120.97	1859.89	1953.9	2132.9	2035.14
		-0.8385	2398.15	2739.89	2703.33	4107.98	2037.03	2086.5	2908.76	2654.11	3843.76	3409.1	2646.17	3474.39	2673.19	2851.52	3057.26	2197.72	3480.95	3638.86	2328.01	2693.09	1912.02	2084.29	2649.41	2338.32	2272.29	1967.43	1845.96	1819.79	1965.27
		-0.774	2853.38	2489.47	2596.59	4088.05	1950.15	1791.53	2534.5	2391.04	3389.62	3114.06	2342.02	3309.96	2429.89	2897.5	3003.7	2189.1	3231.72	3405.5	2262.23	2562.13	1857.15	1903.62	2473.46	2220.31	2396.55	2066.99	1737.57	1757.37	1849.15
		-0.7095	2988.75	2165.53	2412.54	3636.67	1817.75	1699.25	2273.36	2183.47	2884.99	2810.9	2190.46	3291.34	2273.75	2725.9	2875.59	2134.33	3010.04	3183.24	2338.18	2548.89	1908.24	1819.42	2367.53	2056.96	2444.25	1949.99	1615.87	1596.51	1728.14
		-0.645	2862.18	1948.03	2246.69	3018.97	1758.13	1630.83	2231.77	2112.7	2447.35	2572.82	2146.05	3388.39	2268.64	2595.1	2781.91	2217.8	2953.31	3005.33	2322.52	2548.32	1881.75	1785.46	2342.5	1843.77	2484.91	1961.76	1478.84	1524	1679.84
		-0.5805	2590.19	1974.4	2149.68	2539.7	1830.72	1603.18	2209.29	2016.64	2250.12	2384.7	2147.2	3270.21	2365.58	2454.16	2723.68	2312.65	2821.19	2779.25	2317.48	2476.92	1817.76	1785.7	2286.95	1685.94	2260.35	2037.26	1384.97	1417.95	1623.73
		-0.516	2254.92	2092.71	2113.72	2204.6	1888.23	1656.89	2243.8	2099.25	2247.14	2388.8	2151.38	3159.92	2408.98	2353.5	2608.1	2402.1	2722.68	2554.74	2328.22	2502.32	1739.81	1774.18	2151.76	1638.71	2018.45	2056.18	1300.47	1322.35	1507.67
		-0.4515	2019.98	2169.92	2135.26	2180.48	2012.98	1768.12	2286.67	2149.73	2227.26	2531.3	2216.21	2924.77	2299.58	2307.21	2644.4	2550.86	2764.63	2419.42	2315.39	2577.76	1743.5	1728.63	1885.41	1653.74	1907.51	2050.66	1250.31	1388.31	1455.24
		-0.387	1871.6	2268.84	2222.45	2189.83	2106.29	1876.11	2298.8	2274.42	2298.45	2728.12	2179.32	2699.54	2115.84	2295.94	2639.31	2671.48	2769.98	2358.56	2442.48	2530.02	1721.32	1735.75	1771.51	1779.8	1753.82	1907.78	1185.24	1381.26	1335.37
		-0.3225	1763.29	2306.96	2271.48	2294.17	2323.02	1992.64	2615.21	2473.13	2280.02	3020.23	2248.29	2655.54	1938.8	2278.36	2653.1	2728.97	2754.09	2263.68	2405.21	2675.93	1672.5	1728.75	1738.77	1757.99	1606.78	1892.56	1175.34	1384.1	1239.98
		-0.258	1733.44	2274.74	2359.13	2356.21	2367.7	2001.44	3122.89	2607.95	2324.12	3305.63	2435.11	2673.98	1885.1	2343.05	2511.84	2766.29	2714.9	2206.17	2464.56	2794.97	1565	1810.65	1626.04	1847.44	1569.92	1880.79	1166.37	1350.42	1229.7
		-0.1935	1699.45	2318.09	2570.3	2422.42	2472.57	2063.98	3910.43	2718.73	2416.19	3486.22	2632.25	2833.1	2024.09	2524.18	2494.2	2854.23	2621.07	2245.01	2575.02	2869.33	1542.15	1788.56	1608.44	1875.26	1506.15	1974.95	1222.79	1335.16	1247.04
		-0.129	1724.32	2306.44	2831.93	2551.44	2639.54	2123.02	4598.77	2758.07	2467.53	3550.25	2732.38	2982.34	2203.21	2736.49	2581.65	2768.5	2567.39	2202.32	2608.46	2776.95	1562.29	1871.41	1616.5	1897.24	1470.2	2144.11	1272.96	1389.74	1355.73
		-0.0645	1787.66	2316.24	3025.84	2697.34	2826.41	2176.8	5286.98	2793.72	2420.92	3423.27	2873.38	3087.67	2472.37	2860.94	2543.3	2627.16	2417.15	2179.91	2532.34	2751.25	1616.98	1836.64	1687.06	1882.63	1479.75	2092.03	1330.79	1517.04	1481.08
		0	1850.51	2274.92	3037.49	2718.1	2902.06	2140.52	5543.93	2882.58	2251.39	3196.77	2918.8	2925.23	2717.88	2921.65	2595.32	2611.77	2338.42	2179.46	2502.96	2774.28	1708.38	1793.9	1735.66	1806.83	1480.44	2082.43	1452.65	1698.29	1568.14
		0.0645	1835.31	2234.2	2913.2	2648.88	2683.54	2034.64	5136.99	2880.86	2162.44	2911.39	2946.44	2652.42	2750.15	2815.08	2637.79	2553.46	2324.56	2269.5	2411.54	2773.07	1808.32	1711.49	1842.51	1712.72	1470.03	1968.91	1501.1	1922.62	1702.56
		0.129	1871.79	2229.16	2715.04	2478.97	2528.74	1866.93	4405.38	2865.82	2181.48	2747.36	2961.6	2278.55	2570.25	2758.89	2663.75	2518.38	2338.67	2305	2414.44	2676.55	1908.74	1666.1	1935.13	1580.68	1497.81	1815.05	1489.02	1909.56	1785.54
		0.1935	1826.34	2208.66	2421.4	2309.5	2308.28	1745.56	3515.95	2696.98	2223.51	2692.89	2908.69	2036.44	2355.24	2817.74	2624.48	2490.43	2405.62	2328.4	2445.89	2753.59	1876.47	1654.8	1984.71	1525.42	1529.98	1573.13	1435.84	1894.09	1900.01
		0.258	1841.85	2152.53	2288.2	2141.67	2210.9	1621.95	2789.21	2633.72	2326.73	2829.29	2815.58	1860.93	2162.77	2700.45	2632.8	2431.55	2397.88	2396.07	2394.76	2634.47	1855.05	1657.86	2005.85	1482.38	1537.79	1533.4	1406.28	1702.32	1841.17
		0.3225	1859.45	2064.22	2141.87	2114.68	2167.8	1541.89	2259.59	2674.2	2429.54	3146.53	2683.48	1781.86	2055.64	2637.48	2572.56	2421.76	2381.2	2455.38	2409.84	2510.32	1872.01	1659.41	1990.25	1513.02	1604.87	1430.55	1396.07	1658.29	1756.01
		0.387	1925.06	2018.28	2235.37	2102.32	2182.63	1488.14	2082.2	2763.81	2354.93	3672.82	2592.32	1811.28	1936.46	2706.17	2595.66	2351.19	2382.55	2473.12	2450.55	2394.03	1831.72	1614.69	2022.98	1488.59	1652.42	1361.83	1399.19	1602.8	1686.44
		0.4515	2151.51	2122.15	2421.82	2151.16	2277.58	1497.44	1923.89	2882.45	2293.03	4171.37	2503.78	1818.41	2036.68	2809.13	2483.07	2312.59	2376.89	2466.06	2407.31	2366.4	1890.69	1537.28	2102.18	1536.33	1819.28	1392.58	1434.25	1626.19	1636.26
		0.516	2513.59	2337.78	2476.64	2233.82	2198.19	1638.4	1834.76	2910.24	2302.45	4570.98	2400.25	1869.26	2151	2957.14	2418.11	2292.65	2358.44	2472.06	2396.18	2356.64	1962.36	1598.9	2187.89	1564.29	1946.13	1440.79	1567.34	1581.84	1674.76
		0.5805	2979.58	2640.34	2410.86	2411.02	2185.21	1832.21	1827.03	2944.3	2423.61	4850.58	2465.92	1959.25	2250	3189.93	2439.41	2307.87	2376.58	2498.36	2337.29	2422.16	2012.73	1546.61	2192.02	1676.19	2038.67	1458.09	1779.02	1517.62	1755.7
		0.645	3388.89	3082.32	2211.01	2590.17	2158.12	2087.86	1830.22	2952.43	2791.83	4746.65	2574.95	2059.08	2454.66	3169.68	2482.32	2326.93	2409.09	2456.97	2340.87	2473.89	2041.64	1492.28	2167.56	1804.82	2139.42	1498.79	1968.47	1526.85	1898.58
		0.7095	3704.85	3355.59	2174.28	2848.65	2158.43	2168.52	1992.42	3130.03	3031.93	4644.81	2845.12	2175.98	2806.78	3405.46	2561.65	2372.81	2406.1	2523.38	2345.39	2540.32	2190.45	1498.88	2192.53	1894.8	2217.43	1542.41	2110.2	1663	1928.56
		0.774	3566.59	3325.98	2370.34	3125.2	2298.35	2265.83	2117.17	3358.32	3017.04	4384.87	3237.65	2363.85	3316.27	3728.54	2740.68	2479.91	2489.87	2554.41	2444.36	2699.35	2400.83	1534.79	2127.52	2066.85	2314.58	1678.81	2242.65	1777.4	1991.38
		0.8385	3186.43	3149.48	2419.42	3112.36	2633.29	2173.1	2246.48	3790.3	2716.74	4011.8	3794.31	2552.94	3917.36	4108.9	2896.06	2546.44	2528.7	2471.25	2635.66	2890.95	2637.37	1545.43	2181.66	2282.36	2378.65	1829.69	2452.63	1896.45	2043.9
		0.903	2749.25	2592.54	2310.33	2973.41	2883.77	1894.65	2449.96	4372.09	2327.45	3584.86	4353.04	2513.97	4477.8	4309.41	3109.62	2616.61	2626.42	2285.36	2693.09	3202.5	2876.58	1632.73	2186.33	2349.16	2324.99	2091.58	2523.5	2058.65	2157.81
		0.9675	2340.92	2074.67	2047.91	2612.35	3042.42	1512.03	2588.45	4713.48	1877.75	3161.85	4619.54	2282.16	4368.56	4185.64	3179.86	2786.99	2791.58	2100.25	2768.64	3402.71	2878.99	1733.76	2253.98	2300.26	2138	2308.62	2458.04	2034.3	2480.46
		1.032	2105.12	1691.28	1711.98	2185.1	3019.28	1132.87	2524.51	4740.51	1538.72	2688.78	4331.72	2025.06	3761.64	3691.5	3107.36	2834.31	2703.98	1824.65	2588.98	3274.44	2703.06	1748.72	2288.02	2043.24	1773.58	2458.51	2266.72	2048.63	2708.61
		1.0965	2010.21	1540.42	1524.99	1850.05	2679.74	907.4	2321.68	4319.98	1343.62	2311.4	3619.48	1547.42	3125.85	3244.23	2974.68	2897.99	2537.74	1630.26	2384.72	2959.18	2431.85	1970.42	2228.36	1811.95	1527.77	2442.25	2005.09	1946.21	2832.5
		1.161	2105.93	1460.94	1405.69	1704.32	2301.23	770.62	2011.22	3788.48	1144.44	2008.9	2914.38	1261.46	2804.51	2931.64	2666.54	2988.68	2337.19	1515.04	2126.07	2672.38	2164.8	2043.92	2161.96	1520.38	1303.68	2217.7	1757.48	1692.63	2618.57
		1.2255	2200.18	1569.04	1300.34	1648.55	1952.16	688.44	1704.36	3328.93	1064.78	1744.42	2389.5	1103.61	2808.4	2788.81	2342.29	3023.41	1960.74	1452.98	1833.5	2374.77	1972.59	1925.29	2087.62	1356.89	1229.73	1838.96	1651.83	1463.65	2166.64
		1.29	2245.84	1690.17	1272.49	1605.61	1737.57	663.53	1468.42	3088.51	998.11	1574.52	2185.21	997.41	2856.4	2817.41	2255.69	3043.56	1649.84	1398.36	1680.74	2206.48	1800.11	1678.79	1984.95	1248.29	1195.47	1428.89	1575.28	1335.88	1658.75
		1.3545	2278.02	1835.11	1308.03	1557.93	1627.32	662.71	1371.78	2888.08	966.04	1499.63	2034.44	1014.58	2653.98	2883.72	2081.24	2923.91	1478	1371.45	1549.54	2132.44	1684.04	1403.95	1756.8	1150.25	1158.39	1189.11	1518.14	1278.76	1343.08
		1.419	2285.94	1877.65	1319.57	1419.88	1723.01	655.77	1302.49	2584.12	952.44	1428.29	1912.44	1028.11	2456.1	2818.46	1986.57	2679.75	1335.01	1366.99	1554.51	2114.13	1573.65	1124.16	1538.09	1173.49	1142.15	1044.18	1437.76	1268.7	1158.05
		1.4835	2167.22	1926.41	1250.83	1236.86	1799.08	633.87	1300.97	2266.5	961.96	1314.26	1806.16	1022.17	2227.81	2626.34	1962.24	2230.52	1266.29	1369.28	1547.07	2084.43	1474.75	975.83	1368.04	1209.17	1175.21	981.96	1406.67	1269.61	1107.5
		1.548	2083.44		1164.91					2052.06		1263.73	1664.12			2443.03	1887.84	1828.55	1248.26	1325.53			1405.4	916.56	1301.93	1138.39	1172.53	946.37	1433.74	1249.79	1063.45
		1.6125																	1228.5									936.12
RAW int Intensity channel 4 - Noise																												891.99
		image name:	N2_dm1_bub1_cls2_NM_20220525_02						N2_dm1_bub1_cls2_NM_20220525_05					N2_dm1_bub1_cls2_NM_20220525_07			N2_dm1_bub1_cls2_NM_20220525_09						N2_dm1_bub1_cls2_NM_20220525_11					N2_dm1_bub1_cls2_NM_20220525_15
		MEASURED SAMPLE # (measurable chromosome)	1	2	3	4	5	6	1	2	3	4	5	1	2	3	1	2	3	4	5	6	1	2	3	4	5	1	2	3	4
		Line Scan coordinates (ROI)	0096-0594-0318	0080-0589-0330	0084-0586-0325	00103-0609-0336	0104-0598-0328	0080-0614-0332	0128-0568-0570	0112-0574-0571	0100-0574-0564	0137-0572-0564	0092-0569-0562	0072-0592-0548	0080-0586-0552	0084-0591-0548	0080-0622-0436	0080-0622-0436	0104-0629-0437	0104-0629-0437	0124-0640-0436	0124-0640-0436	0164-0607-0266	0181-0618-0272	0181-0618-0272	0208-0618-0261	0216-0623-0258	0088-0512-0491	0100-0520-0491	0116-0520-0481	0116-0520-0481
	Relative Distance between measure points (µm)	-1.548		615.129		560.761		632.273	623.488		640.169				707.691						672.306	672.306
		-1.4835		625.568	553.472	524.709	563.719	618.467	613.735	731.842	638.198	760.966	731.194	752.62	745.211	687.822	705.614	705.614		653.474	660.322	660.322		479.289	479.289	503.258	490.888		486.175	499.856	499.856
		-1.419	602.369	637.736	589.318	530.76	549.663	625.594	609.791	696.139	601.657	753.536	745.31	776.51	738.27	753.146	712.318	712.318	653.474	649.016	655.158	655.158	466.809	467.494	467.494	476.217	472.809		502.235	512.694	512.694
		-1.3545	644.598	646.691	662.864	533.786	571.656	638.81	600.135	670.228	617.383	723.184	737.579	775.454	691.731	825.8	717.88	717.88	649.016	667.912	647.432	647.432	450.179	459.704	459.704	505.471	502.126	469.272	512.174	491.592	491.592
		-1.29	647.344	632.241	759.157	531.251	563.532	628.684	639.08	635.953	613.366	686.869	725.268	811.818	685.666	913.36	668.184	668.184	667.912	650.642	645.457	645.457	484.022	451.879	451.879	496.958	499.243	461.765	484.801	521.16	521.16
		-1.2255	664.635	592.499	796.909	547.385	564.939	637.396	653.259	651.402	627.951	668.078	720.622	772.617	669.297	1005.84	693.556	693.556	650.642	635.967	645.066	645.066	484.832	463.989	463.989	516.528	505.344	457.787	499.305	538.317	538.317
		-1.161	646.523	576.261	745.648	575.076	553.656	677.057	657.151	671.783	641.573	675.375	708.768	785.384	683.133	992.998	705.948	705.948	635.967	662.494	609.955	609.955	456.188	467.984	467.984	501.244	502.548	470.321	511.85	527.388	527.388
		-1.0965	613.858	601.836	702.523	591.063	561.322	638.734	665.479	638.132	667.639	662.646	712.201	755.197	703.895	980.417	671.093	671.093	662.494	676.092	615.207	615.207	479.974	455.274	455.274	495.432	480.148	469.476	498.499	537.93	537.93
		-1.032	588.311	603.366	636.504	558.147	563.414	630.663	688.405	616.853	684.733	655.003	699.858	750.674	817.071	879.876	710.72	710.72	676.092	688.983	621.923	621.923	478.523	461.877	461.877	494.692	481.922	477.616	503.614	570.492	570.492
		-0.9675	588.314	662.588	616.406	541.46	571.402	616.598	671.926	610.137	741.283	656.79	728.959	806.582	949.361	809.628	715.495	715.495	688.983	675.157	614.905	614.905	468.025	464.603	464.603	495.44	491.715	483.193	474.844	552.382	552.382
		-0.903	616.79	725.211	601.232	560.837	560.255	592.8	679.231	622.785	753.908	649.966	730.729	858.765	1028.9	770.683	702.638	702.638	675.157	671.495	633.653	633.653	450.399	480.454	480.454	493.445	487.833	489.244	467.919	566.572	566.572
		-0.8385	590.219	785.102	606.532	565.023	554.074	573.208	639.174	598.563	781.379	645.328	710.9	875.835	1033.27	789.267	682.055	682.055	671.495	673.743	637.518	637.518	465.479	480.37	480.37	497.285	485.84	491.703	465.634	569.338	569.338
		-0.774	582	775.175	645.218	589.437	539.32	532.705	638.145	630.57	731.451	653.305	669.476	843.962	964.97	775.04	712.656	712.656	673.743	662.152	638.966	638.966	465.63	491.978	491.978	500.86	479.447	499.451	468.886	546.064	546.064
		-0.7095	600.1	767.333	649.672	596.419	520.548	513.843	629.252	599.368	672.249	651.55	661.868	824.526	870.242	760.266	747.086	747.086	662.152	656.44	613.102	613.102	446.528	498.722	498.722	539.935	493.95	520.54	459.001	501.788	501.788
		-0.645	576.474	683.565	633.945	583.298	542.462	511.854	640.681	578.899	615.338	634.492	710.088	812.904	815.672	746.593	724.726	724.726	656.44	655.328	654.336	654.336	469.246	528.336	528.336	545.235	493.871	534.598	466.652	471.415	471.415
		-0.5805	582.415	653.286	621.986	570.851	556.542	544.372	611.609	583.047	617.37	605.516	742.451	818.126	785.694	726.861	739.275	739.275	655.328	661.876	624.232	624.232	492.569	540.591	540.591	522.273	516.894	544.223	454.234	469.308	469.308
		-0.516	589.535	618.356	616.759	576.042	574.075	546.027	613.429	574.648	620.753	629.5	783.512	827.173	782.087	787.239	730.724	730.724	661.876	687.958	642.108	642.108	497.355	535.61	535.61	508.5	500.466	542.251	459.685	458.074	458.074
		-0.4515	562.658	600.927	645.627	551.199	591.056	529.486	610.313	590.466	614.712	659.918	765.412	870.763	800.733	802.552	690.813	690.813	687.958	674.372	655.786	655.786	518.476	506.116	506.116	489.148	510.144	549.952	496.117	464.415	464.415
		-0.387	553.732	601.087	661.051	536.727	578.534	542.132	591.898	605.053	620.755	654.691	703.611	882.964	782.612	772.951	695.96	695.96	674.372	682.412	674.805	674.805	517.192	503.814	503.814	475.613	503.816	536.95	488.884	470.598	470.598
		-0.3225	571.93	601.557	669.243	535.425	584.985	538.157	620.932	590.821	633.151	643.166	663.867	912.181	736.87	785.31	699.638	699.638	682.412	678.447	663.323	663.323	532.844	520.437	520.437	464.131	481.416	534.048	482.885	473.498	473.498
		-0.258	580.762	594.783	644.04	534.465	566.841	563.865	607.835	566.914	632.554	673.747	646.614	868.357	697.819	786.836	701.671	701.671	678.447	695.608	674.501	674.501	499.997	486.786	486.786	457.865	470.343	523.236	504.568	475.426	475.426
		-0.1935	591.111	564.569	620.942	530.087	569.032	574.244	632.938	580.225	584.094	678.601	640.382	867.2	675.301	775.447	705.917	705.917	695.608	725.575	669.166	669.166	498.191	491.044	491.044	463.944	463.799	508.029	511.151	459.697	459.697
		-0.129	621.499	552.956	634.725	532.784	564.396	557.93	640.894	626.758	583.284	691.124	649.034	859.052	729.096	787.641	710.255	710.255	725.575	733.409	677.586	677.586	520.226	506.292	506.292	455.2	473.255	469.992	474.609	474.628	474.628
		-0.0645	631.953	567.637	670.871	530.91	560.729	581.347	612.097	639.751	581.675	724.983	667.911	813.841	771.163	803.541	716.318	716.318	733.409	732.474	665.125	665.125	545.549	477.878	477.878	456.429	476.435	466.257	480.789	481.824	481.824
		0	702.231	572.144	654.391	555.305	553.612	580.778	637.744	661.996	602.131	717.494	668.997	812.235	798.335	769.93	695.607	695.607	732.474	686.462	655.134	655.134	539.527	485.797	485.797	444.078	477.917	460.477	509.406	521.922	521.922
		0.0645	728.275	592.615	625.713	558.3	576.799	559.178	634.039	662.061	600.888	700.169	662.14	777.577	789.217	774.154	694.184	694.184	686.462	692.82	686.018	686.018	537.443	488.403	488.403	432.273	463.905	444.504	508.346	552.995	552.995
		0.129	734.541	610.025	620.875	592.88	591.893	579.742	640.263	662.911	636.95	645.423	641.715	780.807	824.176	751.617	689.458	689.458	692.82	692.606	654.788	654.788	528.221	474.519	474.519	464.465	463.839	452.307	492.47	546.507	546.507
		0.1935	749.56	594.296	604.74	593.104	580.755	563.297	628.055	642.102	622.8	641.367	631.269	792.315	887.833	750.131	710.163	710.163	692.606	705.237	673.572	673.572	546.047	481.783	481.783	464.885	466.209	438.662	475.95	566.04	566.04
		0.258	748.281	566.131	648.959	568.967	576.729	531.76	642.959	621.933	602.688	643.769	639.761	779.483	922.97	752.179	685.67	685.67	705.237	698.68	736.375	736.375	537.751	495.135	495.135	451.562	475.561	444.404	473.67	529.958	529.958
		0.3225	735.067	575.52	653.498	566.574	564.649	530.994	614.031	593.671	588.735	666.195	647.605	778.169	896.016	758.456	719.765	719.765	698.68	710.647	744.478	744.478	520.24	488.468	488.468	479.201	479.646	447.065	481.948	500.012	500.012
		0.387	758.864	573.313	663.766	567.212	570.007	537.217	623.747	613.917	603.379	651.386	677.165	778.772	844.769	755.246	711.505	711.505	710.647	690.768	715.722	715.722	495.82	465.437	465.437	489.486	464.607	457.103	475.964	489.75	489.75
		0.4515	754.929	584.374	660.114	594.228	571.418	565.515	625.084	582.991	598.125	657.699	688.438	739.58	808.298	746.952	729.832	729.832	690.768	720.654	687.584	687.584	471.656	490.563	490.563	476.433	484.16	463.574	479.098	465.657	465.657
		0.516	743.273	565.695	667.398	657.141	569.719	555.033	629.143	596.186	597.224	642.789	667.888	754.639	784.676	779.269	733.707	733.707	720.654	716.739	686.603	686.603	478.06	505.959	505.959	485.321	518.964	465.572	513.867	471.928	471.928
		0.5805	732.105	509.844	682.197	721.041	569.039	605.836	621.35	593.053	607.749	657.866	653.553	786.929	785.335	833.955	753.968	753.968	716.739	726.366	667.986	667.986	482.214	464.856	464.856	500.538	540.504	478.029	505.83	477.61	477.61
		0.645	698.619	534.918	670.943	756.666	570.014	584.2	631.248	592.719	614.184	661.49	637.61	806.687	783.376	849.213	738.886	738.886	726.366	752.549	675.287	675.287	495.22	484.276	484.276	509.962	554.437	468.217	548.927	470.5	470.5
		0.7095	706.334	536.666	650.836	744.513	564.878	560.52	620.779	594.936	607.783	661.753	652.079	806.471	777.786	854.481	729.197	729.197	752.549	719.575	658.566	658.566	510.484	472.323	472.323	498.73	529.531	461.99	581.498	491.436	491.436
		0.774	695.452	545.429	654.59	720.644	558.034	539.147	598.168	593.524	607.083	644.235	652.669	832.723	806.495	818.59	746.654	746.654	719.575	726.328	677.798	677.798	523.153	487.442	487.442	488.689	568.268	456.404	528.732	487.844	487.844
		0.8385	712.354	565.252	673.32	657.572	565.034	537.003	596.208	566.544	606.878	655.406	655.518	887.155	840.935	831.697	739.159	739.159	726.328	742.475	658.79	658.79	522.468	473.85	473.85	500.258	552.934	463.343	526.912	500.616	500.616
		0.903	702.404	567.471	647.082	596.964	591.898	545.176	589.554	580.647	591.448	647.829	656.371	939.625	850.517	833.442	715.753	715.753	742.475	738.328	677.123	677.123	529.761	487.128	487.128	512.374	550.388	444.918	522.561	544.464	544.464
		0.9675	723.934	577.991	629.96	564.079	602.28	541.48	580.344	612.283	608.882	677.778	713.829	958.415	861.918	842.286	728.638	728.638	738.328	719.518	639.574	639.574	560.48	462.022	462.022	476.137	553.798	463.962	510.967	548.257	548.257
		1.032	742.947	542.506	594.395	565.087	624.295	524.547	557.338	582.633	635.96	683.477	701.062	943.158	803.818	836.888	734.835	734.835	719.518	676.962	644.559	644.559	539.825	513.607	513.607	470.676	558.889	481.075	497.171	524.398	524.398
		1.0965	801.412	565.521	616.952	595.456	617.681	599.857	576.433	612.518	676.203	665.166	684.322	880.33	821.857	889.288	736.589	736.589	676.962	688.85	657.493	657.493	547.557	515.462	515.462	465.453	572.065	473.523	481.822	533.521	533.521
		1.161	757.257	549.276	627.949	591.501	621.165	618.162	556.607	636.828	664.112	650.762	671.152	833.669	837.357	864.511	765.977	765.977	688.85	667.719	654.843	654.843	525.503	509.759	509.759	468.903	552.659	476.25	467.931	543.867	543.867
		1.2255	719.702	551.809	602.529	621.315	658.306	669.439	566.407	614.141	603.112	671.513	677.723	837.791	810.687	812.176	764.046	764.046	667.719	674.736	675.724	675.724	517.528	567.205	567.205	473.477	520.054	520.996	475.843	544.156	544.156
		1.29	696.745	553.848	594.87	642.198	693.839	702.973	624.085	620.755	627.928	684.806	688.485	848.154	778.566	780.193	745.411	745.411	674.736	673.502	671.265	671.265	537.75	560.866	560.866	491.896	495.395	558.231	467.818	556.382	556.382
		1.3545	692.086	556.524	574.307	622.3	685.59	738.088	675.501	633.984	632.615	684.787	698.793	857.688	793.259	795.706	728.578	728.578	673.502	709.693	686.877	686.877	545.702	556.853	556.853	477.106	494.138	551.855	478.73	553.141	553.141
		1.419	684.216	556.366	591.861	581.664	697.008	743.911	691.13	598.385	583.73	639.948	725.895	854.058	762.188	774.847	702.905	702.905	709.693	708.006	731.436	731.436	531.623	525.187	525.187	513.251	480.241	548.792	508.442	524.309	524.309
		1.4835	716.558	574.236	592.506	559.239	653.397	745.373	685.917	617.402	622.593	597.854	716.087	827.203	758.932	732.749	719.293	719.293	708.006	720.971	794.94	794.94	553.783	530.306	530.306	535.488	476.979	530.81	495.875	522.181	522.181
		1.548	708.931		569.598					600.325		606.019	707.68			737.996	726.021	726.021	720.971	737.128			547.624	525.392	525.392	544.754	480.825	499.749	495.61	487.203	487.203
		1.6125																	737.128									485.378
Average Noise Intensity of channel 4			667.941	600.151	640.792	585.039	582.004	589.697	625.771	616.641	630.413	664.486	689.03	825.875	801.981	805.106	716.799	716.799	692.674	692.674	665.093	665.093	506.674	494.44	494.44	488.969	500.837	474.645	492.915	512.273	512.273
Corrected signal Intensity channel 4 Signal/Average noise
		image name:	N2_dm1_bub1_cls2_NM_20220525_02						N2_dm1_bub1_cls2_NM_20220525_05					N2_dm1_bub1_cls2_NM_20220525_07			N2_dm1_bub1_cls2_NM_20220525_09						N2_dm1_bub1_cls2_NM_20220525_11					N2_dm1_bub1_cls2_NM_20220525_15					Average intensity/noise
		MEASURED SAMPLE # (measurable chromosome)	1	2	3	4	5	6	1	2	3	4	5	1	2	3	1	2	3	4	5	6	1	2	3	4	5	1	2	3	4
	Distance relative to ring Max int (µm)	-1.548	0	1.87031	0	3.3665	0	2.96311	2.25475	0	3.80832	0	0	0	1.14324	0	0	0	0	0	1.7842	1.76889	0	0	0	0	0	0	0	0	0		0.65377
		-1.4835	0	1.84095	1.69431	3.74869	1.96212	3.04409	2.35116	3.07279	3.48756	2.21767	1.97269	2.265	1.17776	1.10486	2.53524	2.11402	0	2.55462	1.84887	1.86464	0	2.91932	2.13071	2.81071	2.02537	0	1.55479	2.49904	3.6877		2.01671
		-1.419	1.64488	2.00588	1.73687	3.95825	2.03681	2.94446	2.53446	3.35269	2.97424	2.27481	2.0763	2.51408	1.19448	1.16059	2.63029	2.31528	3.01097	2.73284	2.00972	1.99592	1.77325	3.14513	2.22692	2.83053	2.09937	0	1.60653	2.52092	3.65085		2.30887
		-1.3545	1.58126	2.21083	1.68435	3.86939	2.34124	2.9672	2.5893	4.14017	2.44059	2.3881	2.2194	2.65791	1.28938	1.24745	2.71591	2.58375	3.26922	2.73604	2.08602	2.19876	1.82595	3.34279	2.22678	2.80216	2.16789	2.67501	1.60724	2.74098	3.49934		2.48636
		-1.29	1.55271	2.36492	1.69294	3.7282	2.81077	3.16849	2.97371	4.81525	2.24694	2.58142	2.55352	2.70364	1.41783	1.31157	2.87074	3.02202	3.76212	2.93327	2.35236	2.55746	2.02458	3.70977	2.36106	2.89726	2.36025	2.71182	1.74065	3.01675	3.30293		2.67396
		-1.2255	1.56337	2.58332	1.64406	3.58294	3.44293	3.5299	3.46526	5.3776	2.30966	2.92948	2.91107	2.89712	1.75476	1.41984	2.92623	3.34966	4.31646	3.2214	2.59937	2.93718	2.26653	4.1369	2.53141	3.22736	2.53831	2.77372	2.00702	3.56546	3.29094		2.93446
		-1.161	1.61454	2.81809	1.60249	3.42837	4.02037	4.34889	4.18417	5.54548	2.79956	3.39783	3.34142	3.19557	2.28911	1.54135	2.91623	3.50441	4.71301	3.56715	2.85035	3.28115	2.73243	4.68534	2.98627	3.55452	2.72891	2.84741	2.51963	4.2791	3.47686		3.26793
		-1.0965	1.69806	3.15098	1.84121	3.74146	4.4727	5.14477	5.14031	5.58545	3.58738	3.94762	3.78905	3.62807	2.95207	1.87259	3.15037	3.38315	5.18251	4.0891	3.04682	3.59444	3.33897	5.10705	3.93947	4.0414	2.98115	3.0251	3.06136	4.65246	3.54967		3.67913
		-1.032	1.85711	3.61704	2.35596	4.24789	4.47236	5.2686	5.85959	5.40831	4.75233	4.48267	4.22113	3.96325	3.44215	2.3939	3.4652	3.38594	5.43765	4.62837	3.32937	3.8204	3.78792	5.13628	4.77033	4.47202	3.32581	3.21145	3.70697	4.74349	3.77935		4.0463
		-0.9675	2.13366	4.12453	3.16764	5.1667	4.13284	4.81126	5.91836	4.94362	6.09106	4.97735	4.38196	4.304	3.82918	2.93253	3.88908	3.33561	5.55833	5.03608	3.44845	3.96331	4.06617	5.06205	5.42802	4.67813	3.77327	3.58175	4.02841	4.64721	3.942		4.3225
		-0.903	2.75111	4.53651	3.95027	6.38903	3.87283	4.12055	5.34512	4.70072	6.51779	5.42129	4.18483	4.32166	3.64282	3.3019	4.13988	3.23696	5.42696	5.3138	3.52423	3.9683	4.01268	4.7245	5.64433	4.87354	4.23485	3.91849	3.96397	4.1636	3.97276		4.41984
		-0.8385	3.59036	4.56534	4.21874	7.02172	3.50003	3.53826	4.64828	4.30414	6.09721	5.13043	3.84043	4.20692	3.33323	3.5418	4.26516	3.06602	5.02538	5.25335	3.50028	4.04919	3.77367	4.21546	5.35841	4.78215	4.53699	4.14506	3.74499	3.55238	3.83637		4.29799
		-0.774	4.27191	4.14808	4.05216	6.98766	3.35075	3.03805	4.0502	3.87752	5.37683	4.68642	3.39901	4.00782	3.02986	3.59891	4.19044	3.054	4.66557	4.91646	3.40137	3.85229	3.66538	3.85005	5.00255	4.5408	4.78509	4.35481	3.52509	3.43053	3.6097		4.09377
		-0.7095	4.47457	3.60831	3.76494	6.21612	3.12326	2.88156	3.63289	3.54091	4.57635	4.23019	3.17905	3.98527	2.83517	3.38577	4.01171	2.97759	4.34554	4.59558	3.51557	3.83238	3.76621	3.67976	4.78831	4.20673	4.88033	4.10831	3.27819	3.11652	3.37347		3.85899
		-0.645	4.28508	3.2459	3.50612	5.16029	3.02082	2.76554	3.56643	3.42614	3.88214	3.8719	3.1146	4.10279	2.8288	3.2233	3.88102	3.09403	4.26364	4.33874	3.49202	3.83152	3.71393	3.61108	4.73768	3.77073	4.96152	4.13311	3.0002	2.97498	3.27919		3.69252
		-0.5805	3.87787	3.28984	3.35473	4.34108	3.14555	2.71865	3.53051	3.27036	3.56928	3.58879	3.11627	3.95969	2.94967	3.04825	3.79978	3.22636	4.0729	4.01235	3.48444	3.72417	3.58763	3.61156	4.62533	3.44795	4.51315	4.29218	2.80976	2.76796	3.16966		3.54847
		-0.516	3.37593	3.48697	3.29861	3.7683	3.24436	2.80973	3.58566	3.40433	3.56455	3.59496	3.12233	3.82615	3.00379	2.92322	3.63854	3.35115	3.93068	3.68823	3.50059	3.76236	3.43379	3.58826	4.35191	3.35136	4.03016	4.33204	2.63833	2.58134	2.9431		3.45278
		-0.4515	3.02419	3.61563	3.33222	3.72707	3.4587	2.99835	3.65416	3.48619	3.53302	3.80941	3.21642	3.54142	2.86738	2.86572	3.68918	3.55868	3.99124	3.49287	3.4813	3.87579	3.44107	3.49614	3.81322	3.3821	3.80865	4.32041	2.53657	2.7101	2.84075		3.43338
		-0.387	2.80205	3.78045	3.46829	3.74305	3.61903	3.18148	3.67355	3.6884	3.64595	4.10561	3.16288	3.2687	2.63827	2.85173	3.68208	3.72696	3.99897	3.40501	3.67239	3.80401	3.39729	3.51054	3.58286	3.63991	3.50178	4.01938	2.40455	2.69634	2.60675		3.42339
		-0.3225	2.63989	3.84397	3.5448	3.9214	3.99142	3.37909	4.17918	4.01065	3.61671	4.54521	3.26298	3.21542	2.41751	2.82989	3.70132	3.80716	3.97603	3.26803	3.61635	4.02339	3.30094	3.49638	3.51665	3.5953	3.20819	3.98732	2.38447	2.70188	2.42054		3.46214
		-0.258	2.5952	3.79028	3.68159	4.02744	4.06818	3.39401	4.99047	4.22928	3.68666	4.97472	3.53412	3.23775	2.35056	2.91024	3.50425	3.85923	3.91945	3.18501	3.70559	4.20237	3.08877	3.66202	3.28865	3.77824	3.13459	3.96252	2.36627	2.63613	2.40048		3.5229
		-0.1935	2.54431	3.86251	4.01113	4.14062	4.24837	3.50007	6.24898	4.40893	3.83271	5.24649	3.82023	3.43042	2.52386	3.13522	3.47964	3.98191	3.78399	3.24108	3.87167	4.31418	3.04367	3.61735	3.25305	3.83513	3.00727	4.1609	2.48073	2.60634	2.43433		3.65742
		-0.129	2.58155	3.8431	4.41942	4.36115	4.53526	3.60019	7.34897	4.47273	3.91415	5.34285	3.96555	3.61113	2.74721	3.39892	3.60164	3.86231	3.70649	3.17945	3.92195	4.17528	3.08342	3.78491	3.26936	3.88008	2.93549	4.51729	2.58252	2.71289	2.6465		3.79316
		-0.0645	2.67638	3.85943	4.72204	4.61053	4.85634	3.69139	8.44874	4.53054	3.84022	5.15176	4.17018	3.73866	3.08283	3.5535	3.54814	3.66513	3.48959	3.14709	3.8075	4.13664	3.19136	3.71459	3.41206	3.85021	2.95456	4.40757	2.69984	2.96139	2.89119		3.88998
		0	2.77047	3.79058	4.74022	4.64602	4.98632	3.62986	8.85936	4.67465	3.5713	4.81089	4.2361	3.54198	3.38896	3.6289	3.62071	3.64366	3.37593	3.14644	3.76332	4.17127	3.37175	3.62815	3.51036	3.69519	2.95593	4.38734	2.94706	3.3152	3.06114		3.92652
		0.0645	2.74771	3.72273	4.54625	4.5277	4.61086	3.45031	8.20906	4.67186	3.4302	4.38142	4.27622	3.21165	3.4292	3.49654	3.67996	3.56231	3.35592	3.27643	3.62587	4.16945	3.569	3.46147	3.72646	3.50272	2.93515	4.14817	3.04536	3.75312	3.32354		3.85678
		0.129	2.80233	3.71433	4.23701	4.23728	4.34488	3.16591	7.03992	4.64747	3.4604	4.13457	4.29822	2.75895	3.20488	3.42674	3.71618	3.51337	3.37629	3.32768	3.63023	4.02432	3.7672	3.36967	3.91378	3.23268	2.99062	3.82402	3.02085	3.72762	3.48552		3.73769
		0.1935	2.73429	3.68018	3.77876	3.9476	3.96609	2.96009	5.61859	4.37366	3.52707	4.05259	4.22143	2.4658	2.93678	3.49984	3.66139	3.47438	3.47295	3.36147	3.67751	4.14016	3.70351	3.34682	4.01406	3.11967	3.05485	3.31433	2.91296	3.69742	3.70898		3.6008
		0.258	2.75751	3.58665	3.5709	3.66073	3.79877	2.75048	4.45724	4.27107	3.69081	4.25786	4.0863	2.25328	2.69679	3.35416	3.673	3.39223	3.46177	3.45916	3.60064	3.96105	3.66123	3.35301	4.05681	3.03165	3.07044	3.23062	2.85299	3.32307	3.59412		3.4798
		0.3225	2.78386	3.4395	3.34254	3.6146	3.72472	2.61471	3.61089	4.33672	3.85389	4.73529	3.89458	2.15754	2.5632	3.27594	3.58896	3.37858	3.43769	3.54479	3.62331	3.77439	3.6947	3.35614	4.02526	3.09431	3.20438	3.01394	2.83228	3.23712	3.42788		3.42006
		0.387	2.88208	3.36296	3.48845	3.59347	3.7502	2.52357	3.32741	4.48204	3.73554	5.52731	3.76228	2.19316	2.4146	3.36126	3.62118	3.28013	3.43964	3.5704	3.68452	3.59954	3.61519	3.26569	4.09146	3.04435	3.29932	2.86915	2.83861	3.1288	3.29207		3.41532
		0.4515	3.22111	3.53603	3.77942	3.67695	3.91334	2.53934	3.07443	4.67444	3.63735	6.27759	3.63378	2.2018	2.53956	3.48914	3.46411	3.22627	3.43147	3.5602	3.61951	3.558	3.73157	3.10913	4.25164	3.14198	3.63248	2.93394	2.90973	3.17446	3.19412		3.48734
		0.516	3.76319	3.89532	3.86497	3.81824	3.77693	2.77837	2.932	4.7195	3.65229	6.87897	3.48352	2.26337	2.68211	3.67298	3.37348	3.19846	3.40483	3.56887	3.60277	3.54332	3.87302	3.23376	4.42499	3.19916	3.88576	3.03551	3.17974	3.08788	3.26927		3.58837
		0.5805	4.46085	4.39946	3.76232	4.12113	3.75463	3.10703	2.91965	4.77474	3.84448	7.29975	3.57883	2.37233	2.80555	3.96213	3.4032	3.21969	3.43102	3.60683	3.51423	3.64184	3.97244	3.128	4.43334	3.42801	4.07053	3.07196	3.60919	2.96252	3.42727		3.727
		0.645	5.07364	5.13591	3.45044	4.42735	3.70808	3.54056	2.92474	4.78792	4.42858	7.14334	3.73707	2.49321	3.06075	3.93697	3.46306	3.24628	3.47796	3.54708	3.51961	3.71961	4.0295	3.01812	4.38387	3.69107	4.27169	3.15771	3.99353	2.98054	3.70619		3.86394
		0.7095	5.54668	5.59125	3.39312	4.86917	3.70862	3.67734	3.18394	5.07593	4.80944	6.99008	4.12917	2.63476	3.49981	4.22983	3.57374	3.31029	3.47364	3.64296	3.52641	3.81949	4.32319	3.03147	4.43437	3.87509	4.42745	3.24961	4.28107	3.24632	3.76471		4.04548
		0.774	5.33968	5.54191	3.69908	5.34187	3.94903	3.84236	3.3833	5.44615	4.78582	6.59889	4.69885	2.86224	4.1351	4.63112	3.8235	3.4597	3.59458	3.68775	3.67521	4.0586	4.73841	3.1041	4.30289	4.22696	4.62143	3.53698	4.54977	3.46963	3.88734		4.24111
		0.8385	4.77053	5.24782	3.77567	5.31992	4.52452	3.68511	3.58994	6.14669	4.30946	6.03745	5.50674	3.09119	4.88461	5.10355	4.04027	3.55252	3.65064	3.5677	3.96284	4.34668	5.20526	3.12562	4.41239	4.6677	4.74935	3.85486	4.97577	3.70203	3.98986		4.40678
		0.903	4.11601	4.31982	3.60543	5.08242	4.9549	3.21292	3.91511	7.09017	3.69195	5.39494	6.31764	3.04401	5.58343	5.3526	4.3382	3.65041	3.79171	3.29933	4.04919	4.81511	5.67738	3.30218	4.42183	4.80432	4.64221	4.40662	5.11955	4.01866	4.21223		4.4907
		0.9675	3.50468	3.45692	3.19591	4.46526	5.22749	2.56408	4.13642	7.6438	2.9786	4.75834	6.70441	2.76332	5.44721	5.19887	4.4362	3.88811	4.03015	3.03209	4.16279	5.11614	5.68214	3.50651	4.55865	4.70431	4.26886	4.86389	4.98675	3.97112	4.84207		4.41707
		1.032	3.15166	2.81809	2.67166	3.73497	5.18773	1.9211	4.03424	7.68763	2.44081	4.04641	6.2867	2.45202	4.69044	4.58511	4.33505	3.95412	3.90368	2.63421	3.89266	4.92328	5.33491	3.53677	4.6275	4.17867	3.54123	5.17968	4.59861	3.9991	5.28743		4.12536
		1.0965	3.00956	2.56672	2.37985	3.16227	4.60433	1.53876	3.71011	7.00566	2.13133	3.47848	5.25301	1.87367	3.89766	4.02957	4.14995	4.04296	3.66369	2.35358	3.58554	4.44927	4.79964	3.98516	4.50684	3.70566	3.05043	5.14542	4.06782	3.79916	5.52928		3.77501
		1.161	3.15287	2.43429	2.19368	2.91318	3.95398	1.30681	3.21399	6.14373	1.81538	3.02324	4.22969	1.52742	3.49698	3.64131	3.72007	4.16948	3.37416	2.18723	3.19665	4.01805	4.27257	4.13381	4.37254	3.10936	2.603	4.67233	3.56549	3.30416	5.11167		3.40887
		1.2255	3.29398	2.61441	2.02927	2.81785	3.3542	1.16745	2.72362	5.39849	1.68902	2.62522	3.46792	1.33629	3.50183	3.46391	3.26771	4.21793	2.83068	2.09764	2.75676	3.57058	3.89321	3.89388	4.22219	2.775	2.45535	3.87439	3.35115	2.85717	4.22946		3.09574
		1.29	3.36234	2.81624	1.98581	2.74445	2.98549	1.1252	2.34658	5.0086	1.58326	2.36953	3.17143	1.2077	3.56168	3.49943	3.14689	4.24604	2.38184	2.01879	2.52707	3.31755	3.5528	3.39534	4.01454	2.5529	2.38695	3.01044	3.19585	2.60775	3.23802		2.8745
		1.3545	3.41051	3.05775	2.04127	2.66295	2.79606	1.12381	2.19214	4.68357	1.53239	2.25683	2.95262	1.22849	3.30928	3.58179	2.90352	4.07912	2.13376	1.97994	2.32981	3.20623	3.32372	2.83948	3.55311	2.3524	2.31291	2.50526	3.07993	2.49625	2.6218		2.70851
		1.419	3.42237	3.12863	2.05928	2.42699	2.96048	1.11205	2.08142	4.19064	1.51082	2.14947	2.77556	1.24487	3.06254	3.50073	2.77145	3.7385	1.92733	1.9735	2.33728	3.1787	3.10584	2.2736	3.11077	2.39993	2.28048	2.19992	2.91685	2.47661	2.26061		2.57163
		1.4835	3.24463	3.20988	1.95201	2.11415	3.09118	1.07491	2.07899	3.67556	1.52592	1.97786	2.62131	1.23768	2.77788	3.26211	2.7375	3.11178	1.82812	1.9768	2.3261	3.13404	2.91065	1.97361	2.76685	2.4729	2.34649	2.06883	2.85378	2.47838	2.16193		2.44799
		1.548	3.1192	0	1.81792	0	0	0	0	3.3278	0	1.90182	2.41516	0	0	3.03442	2.63371	2.55099	1.80209	1.91364	0	0	2.77378	1.85373	2.63314	2.32814	2.34114	1.99385	2.9087	2.43969	2.07594		1.58155
		1.6125	0	0	0	0	0	0	0	0	0	0	0	0	0	0	0	0	1.77356	0	0	0	0	0	0	0	0	1.97225	0	0	0		0.129166
VC2773 (bub-3∆)
RAW int INTENSITY channel 4 - CLS-2 signal
		image name:	VC2773_dm1_bub1_cls2_NM_20220525_22			VC2773_dm1_bub1_cls2_NM_20220525_31					VC2773_dm1_bub1_cls2_NM_20220525_33		VC2773_dm1_bub1_cls2_NM_20220602_19					VC2773_dm1_bub1_cls2_NM_20220602_23		VC2773_dm1_bub1_cls2_NM_20220602_24						VC2773_dm1_bub1_cls2_NM_20220602_27
		MEASURED SAMPLE # (measurable chromosome)	1	2	3	1	2	3	4	5	1	2	1	2	3	4	5	1	2	1	2	3	4	5	6	1	2	3	4	5	6
		Line Scan coordinates (ROI)	0047-0755-0394	0071-0764-0414	0089-0757-0400	0067-0486-0419	0093-0461-0423	0096-0482-0427	0105-0501-0425	0120-0484-0427	0093-0608-0532	0120-0616-0521	0053-0563-0555	0069-0558-0565	0098-0301	0085-0526-0560	0100-0557-0571	0087-0616-0517	0093-0598-0520	0045-0499-0539	0068-0475-0528	0065-0485-0534	0076-0496-0540	0096-0504-0539	0101-0486-0529	0067-0572-0540	0080-0555-0556	0088-0579-0529	0088-0562-0545	0104-0575-0539	0116-0563-0549
	Distance relative to ring Max int (µm)	-1.548					529.036				618.229	622.253			875.667	852.853		738.471	741.767
		-1.4835	661.44	677.08	912.448	475.2	518.983	663.169		578.351	603.215	624.665	643.14	913.06	953.218	886.076	842.629	776.482	777.647	657.33	947.401	858.422	775.615	660.415	791.523	942.216		848.261	892.85	799.424	650.4
		-1.419	662.43	686.12	885.992	472.301	527.587	725.432	528.281	577.452	611.599	644.476	620.58	988.76	945.284	939.829	818.376	792.767	851.946	698.41	913.306	875.824	728.553	652.854	779.708	964.096	942.945	818.631	906.523	798.882	740.32
		-1.3545	699.65	715.746	832.106	487.919	516.499	836.361	530.011	571.836	571.5	672.085	608.82	975.09	1042.28	1043.46	832.744	870.083	933.796	796.439	834.564	851.327	745.358	639.837	759.723	932.17	1002.44	846.837	903.93	873.697	819.95
		-1.29	699.86	699.598	838.811	497.862	515.828	974.318	556.268	583.14	545.796	728.931	596.59	984.85	1084.65	1180	848.595	945.452	997.503	941.207	793.331	869.331	768.839	670.904	755.346	935.291	1059.64	875.627	933.108	986.342	860.37
		-1.2255	722.71	684.251	903.305	475.915	529.238	1055.45	586.598	604.314	596.334	800.482	599.8	996.14	1176.74	1363.09	902.032	991.31	1041.12	1130.98	831.279	854.232	863.713	753.619	750.773	1024.87	1093.47	949.798	1049.68	1128.78	978.57
		-1.161	803.07	719.481	1015.4	485.005	552.158	1033.05	578.066	598.861	617.961	861.235	615.1	1071.91	1234.66	1412.03	996.14	991.925	1080.5	1345.92	898.351	897.664	945.282	872.988	757.124	1072.16	1183.1	1067.1	1289.32	1227.32	1164.03
		-1.0965	902.36	830.927	1173.67	497.474	576.484	967.643	572.967	631.316	660.286	893.57	666.36	1107.11	1286.43	1392.7	1117.37	953.516	1113.06	1560.58	958.131	919.905	1051.77	1078.1	781.018	1144.9	1283.56	1167.25	1449.19	1318.87	1313.56
		-1.032	990.28	932.012	1256.71	497.458	579.173	907.206	577.126	665.442	689.256	891.481	689.07	1122.6	1291.97	1233.65	1323.31	960.018	975.292	1551.58	1046.65	977.727	1178.42	1244.08	879.591	1180.81	1464.13	1229.08	1525.95	1341.72	1415.09
		-0.9675	1053.45	1029.95	1285.97	529.686	586.199	807.294	595.095	702.134	733.79	882.804	716.65	1324.46	1268.8	1116.41	1514.04	945.435	938.029	1497.37	1205.12	1074.51	1400.46	1320.65	956.435	1193.55	1608.45	1199.49	1550.94	1311.71	1424.42
		-0.903	1049.49	982.083	1237.15	576.31	584.164	744.262	559.351	730.601	804.466	869.642	770.04	1493.67	1261.69	957.111	1554.73	964.189	919.43	1343.13	1438.74	1240.53	1587.64	1307.79	986.741	1252.49	1621.69	1184.85	1472.96	1319.5	1310.37
		-0.8385	1000.72	921.811	1153.27	577.27	562.127	755.14	588.231	767.941	818.93	841.987	769.3	1652.53	1289.28	902.54	1485.94	910.599	900.274	1177.36	1640.77	1385.88	1717.83	1151.62	1036.03	1239.01	1503.43	1114.34	1430.12	1314.72	1213.56
		-0.774	947.68	957.069	1145.17	626.296	572.277	744.97	612.688	739.084	827.093	828.736	823.79	1594	1213.49	898.371	1379.96	880.597	888.909	1087.31	1602.57	1364.54	1578.3	991.724	1013.69	1236.27	1389.12	1054.09	1304.82	1266.73	1123.84
		-0.7095	851.42	940.38	1101.27	630.998	545.411	755.353	604.085	720.411	843.575	835.028	892.2	1464.67	1194.62	881.094	1257.31	812.831	916.987	1061.44	1484.29	1170.45	1346.89	914.984	965.558	1225.22	1349.81	1032.89	1196.21	1251.69	1149.32
		-0.645	828.05	876.336	1070.36	648.534	550.629	767.533	621.118	686.732	819.158	893.626	931.96	1484.76	1177.71	913.611	1144.53	766.133	894.745	1015.19	1262.65	987.254	1132.71	865.753	878.515	1206.38	1205.07	1008.13	1183	1194.94	1173.56
		-0.5805	855.55	826.064	1045.22	675.542	566.951	767.295	571.252	658.097	788.027	912.293	971.42	1508.42	1130.61	914.727	1014.09	763.174	948.666	970.287	1082.19	876.418	1075.78	850.41	864.317	1198.43	1163.56	1027.59	1085.59	1232.81	1184.06
		-0.516	938.15	810.039	971.062	697.296	537.26	771.745	546.861	672.535	785.75	917.201	969.05	1627.91	1119.91	992.773	1041.81	806.606	1065.87	988.556	997.677	870.912	1016.14	915.143	837.431	1185.36	1059.45	1029.01	1095.81	1178.06	1166.92
		-0.4515	1038.12	790.441	992.291	742.5	555.396	814.298	575.893	669.847	840.497	973.639	1039.06	1682.08	1158.82	1132.45	1120.58	853.041	1102.55	1003.5	935.223	942.331	1004.68	905.346	846.946	1185.51	1042.74	1112.68	1145.68	1231.31	1130.82
		-0.387	1154.87	805.086	1045.12	749.8	576.417	826.291	631.985	700.107	794.351	985.811	1061.98	1694.83	1194.8	1246.26	1194.74	885.77	1031.4	1019.08	945.155	1047.95	998.025	868.516	877.819	1250.85	1030.43	1220.22	1193.66	1238.51	1141.46
		-0.3225	1244.26	825.016	1155.47	745.475	605.294	851.538	613.919	735.039	819.817	1042.62	1079.68	1607.9	1266.52	1363.39	1158.68	896.049	978.6	1038.5	978.791	1111.9	1039.79	860.873	913.193	1346.15	1108.17	1269.58	1183.63	1271.78	1274.32
		-0.258	1282.73	921.461	1280.82	803.201	637.782	815.643	653.62	713.033	802.896	1069.95	1168.04	1564.85	1370.13	1401.33	1169.23	940.764	928.966	1024.85	953.685	1212.9	1101.53	860.55	974.171	1469.23	1281.17	1338.44	1213.1	1230.51	1322.9
		-0.1935	1285.92	1057.42	1445.75	827.37	686.469	825.905	681.162	715.96	802.815	1105.37	1219.02	1684.54	1440.99	1331.01	1224.26	966.222	903.339	1109.92	975.804	1196.67	1186.73	875.154	962.087	1603.1	1471.63	1420.49	1210.18	1220.34	1451.17
		-0.129	1361.91	1236.61	1571.42	941.821	796.761	871.369	737.723	707.544	852.899	1216.88	1266.85	1948.9	1542.85	1293.61	1273.06	1067.12	887.319	1249.7	982.651	1131.5	1229.5	913.74	982.095	1734.98	1602.5	1514.28	1264.47	1245.24	1517.15
		-0.0645	1382.03	1320.63	1613.14	995.816	833.579	877.729	768.852	721.922	895.028	1319.38	1315.43	2118.8	1605.93	1225.45	1357.09	1176.72	927.379	1349.71	978.852	1119.96	1337.85	949.664	1015.49	1791.47	1662.45	1477.27	1330.46	1349.65	1560.71
		0	1395.35	1406.3	1591.09	1034.95	903.332	920.811	762.421	732.585	948.275	1369.5	1438.73	2139.14	1583.22	1140.79	1423.55	1261.51	944.567	1434.53	927.905	1093.08	1335.5	989.538	1047.69	1752.61	1686.92	1381.47	1378.59	1421.72	1626.24
		0.0645	1357.68	1335.7	1507.96	985.649	951.825	1006.28	718.155	739.257	957.559	1349.62	1578.39	1911.02	1502.88	1086.43	1473.71	1239.09	956.411	1446.81	905.135	1068.93	1302.83	1026.62	1063.07	1604.31	1640.25	1301.41	1358.44	1481.43	1650.44
		0.129	1340.22	1205.65	1441.11	993.661	960.333	1090.57	674.182	685.549	912.145	1263.48	1688.49	1550.74	1366.26	1049.69	1415.22	1151.21	982.589	1456.71	879.707	1077.97	1243.82	1039.39	1092	1484.71	1590.08	1214.35	1368.26	1461.2	1539.2
		0.1935	1298.22	1072.34	1317.54	928.237	925.819	1062.46	650.893	679.221	926.265	1164.45	1835.43	1334.41	1201.45	984.231	1431.07	1096.61	980.02	1251.56	822.836	989.297	1209.24	1010.33	1052.34	1447.32	1512.88	1162.35	1371.3	1393.12	1470.58
		0.258	1159.38	959.472	1260.95	840.244	835.505	989.548	624.761	627.079	913.185	1037.62	1963.35	1189.94	1080.91	949.859	1383.98	970.635	1000.9	1133.94	794.864	931.994	1196.56	935.661	1126.38	1360.88	1387.71	1056.41	1364.06	1306.79	1317.28
		0.3225	1048.81	820.867	1201.59	779.847	769.52	899.484	595.711	630.807	888.885	907.2	1927.26	1115.39	1053.57	961.662	1286.07	879.782	960.506	969.724	757.845	880.206	1202.37	875.322	1159.28	1235.19	1281.35	985.304	1343.38	1271.34	1246.44
		0.387	932.84	797.44	1184.04	743.424	741.149	802.474	547.627	626.758	831.702	847.073	1764.2	1124.62	1086.7	970.546	1159.24	794.078	894.925	857.805	709.73	848.321	1156.87	831.967	1230.35	1140.6	1181.8	970.067	1301.73	1206.99	1303.1
		0.4515	943.01	802.157	1239.43	743.661	711.999	752.695	560.809	610.955	819.517	846.65	1549.16	1173.59	1092.72	926.08	1069.67	753.853	844.889	837.307	728.024	854.23	1157.41	866.021	1199.19	1160.62	1080.26	956.353	1315.6	1128.05	1189.99
		0.516	902.98	840.855	1217.5	754.994	686.806	680.881	556.093	640.101	774.653	873.963	1344.35	1144.73	1087.03	910.327	972.804	722.35	818.432	827.31	800.505	864.62	1136.75	830.022	1134.69	1120.26	1079.8	932.14	1308.73	1077.7	1154.91
		0.5805	904.24	907.518	1213.08	811.725	657.549	662.622	583.048	635.497	820.022	865.676	1219.29	1146.73	1111.39	897.059	910.906	776.025	780.189	817.637	905.005	891.86	1132.74	837.573	1124.27	1023.25	1010.2	935.019	1255.05	1066.29	1139.11
		0.645	888.58	1000.76	1145.39	784.009	618.275	658.097	601.194	697.219	883.137	858.213	1219.7	1129.26	1103.32	851.298	889.991	782.018	824.76	841.517	1028.88	914.865	1105.13	838.286	1142.8	987.525	995.054	945.135	1225.86	1045.46	1161.92
		0.7095	943.86	1135.38	1118.86	749.079	590.995	675.442	625.515	649.246	946.646	851.492	1298.77	1139.31	1073.39	855.755	920.565	817.32	849.238	841.793	1158.71	980.774	1152.6	876.843	1126.26	964.844	1080.24	983.965	1228.35	1087.82	1194.42
		0.774	1033.78	1204.43	1183.57	717.826	576.843	677.512	616.055	656.951	984.782	869.838	1342.15	1200.15	1126.14	882.351	960.123	886.872	821.172	895.612	1251.69	1054.92	1266.82	915.551	1128.07	901.974	1118.89	1005.16	1186.66	1215.41	1264.43
		0.8385	1082.24	1217.08	1236.35	701.462	578.102	661.188	618.234	622.817	982.261	833.114	1336.19	1191.41	1223.89	889.966	1109.51	981.941	799.439	897.713	1293.1	1226.01	1388.49	974.681	1111.48	963.787	1184.55	1089.86	1220.87	1359.27	1289.04
		0.903	1327.05	1114.74	1341.86	735.027	586.34	657.389	614.736	561.836	906.666	830.599	1243.07	1193.26	1284.26	895.46	1295.84	1030.77	817.307	962.746	1197.22	1469.15	1507.7	1065.33	1111.57	1022.89	1245.13	1217.96	1261.16	1415.35	1329.97
		0.9675	1471.73	959.441	1393.4	701.906	601.37	652.424	635.455	570.505	851.743	863.522	1062.51	1252.51	1310.2	895.287	1456.92	983.87	811.894	1041.26	1112.55	1585.8	1458.59	1154.93	1064.09	1044.88	1226.03	1238.6	1333.3	1474.55	1314.73
		1.032	1694.55	779.95	1394.09	706.764	591.155	673.863	628.05	535.871	782.182	874.814	957	1270.81	1289.57	847.086	1557.87	959.835	817.519	1161.46	984.04	1626.2	1359.76	1190.59	1045.68	1078.69	1228.85	1207.52	1428.9	1364.66	1213.96
		1.0965	1652.22	695.479	1329.73	675.006	536.563	689.177	591.505	539.489	763.151	826.296	869.13	1188.55	1249.19	820.541	1453.59	877.39	766.266	1179.73	933.472	1510.26	1240.62	1181.84	930.526	970.095	1203.89	1160.96	1584.82	1290.08	1174.16
		1.161	1480.9	641.749	1212.26	668.679	513.899	681.846	571.617	540.011	746.103	846.915	842.06	1140.72	1162.68	766.521	1278.66	797.181	788.989	1092.87	952.924	1298.36	1073.38	1112.02	870.955	896.188	1161.64	1078.83	1635.77	1199.68	1134.69
		1.2255	1273.92	608.417	1106.79	624.773	481.686	643.043	571.438	522.663	734.585	801.115	863.91	1051.88	1028.76	783.301	1141.51	742.914	710.612	978.011	994.267	1081.41	980.425	1047.32	812.975	875.39	1086.67	1039.33	1601.38	1181.1	1039.49
		1.29	1139.94	594.123	976.769	578.455	488.728	632.047	538.081	527.81	739.849	769.295	917.15	934.06	943.819	837.222	1016.95	718.381	701.685	859.197	1008.53	935.845	941.929	906.775	809.175	872.78	1077.77	975.015	1553.72	1078.32	997.02
		1.3545	1048.99	590.147	851.42	591.662	485.487	609.043	519.851	510.389	733.958	755.94	906.24	893.17	849.838	870.866	985.542	665.393	715.341	789.483	991.369	863.362	920.485	805.01	810.335	882.269	1001.8	887.937	1438.97	960.706	951.18
		1.419	1041.74	565.686	761.755	550.997	502.773	569.403	497.205	509.105	726.987	783.881	856.2	924.62	836.806	860.383	999.155	604.637	714.691	741.347	938.885	778.788	915.655	789.923	817.557	861.962	973.081	816.693	1236.44	926.312	956.93
		1.4835	1072.67	580.795	683.781	542.867	493.107	523.926	485.507	494.711	683.589		863.52	896.35	822.934	851.798	978.704	567.079	677.678	692.067	897.56	756.061	886.258	829.394	906.163	903.83	951.435	777.646	1127.75	911.039	963.23
		1.548	997.24	593.208	689.456			528.244	490.934	486.132			895.62	929.85			951.774			705.631	846.52	763.033	883.812	885.482	971.492		956.87
		1.6125
RAW int INTENSITY channel 4 - NOISE
		image name:	VC2773_dm1_bub1_cls2_NM_20220525_22			VC2773_dm1_bub1_cls2_NM_20220525_31					VC2773_dm1_bub1_cls2_NM_20220525_33		VC2773_dm1_bub1_cls2_NM_20220602_19					VC2773_dm1_bub1_cls2_NM_20220602_23		VC2773_dm1_bub1_cls2_NM_20220602_24						VC2773_dm1_bub1_cls2_NM_20220602_27
		MEASURED SAMPLE # (measurable chromosome)	1	2	3	1	2	3	4	5	1	2	1	2	3	4	5	1	2	1	2	3	4	5	6	1	2	3	4	5	6
		Line Scan coordinates (ROI)	0048-0707-0354	0072-0718-0360	0089-0705-0440	0068-0531-0432	0093-0555-0425	0093-0555-0425	0108-0542-0418	0117-0546-0422	0096-0586-0441	0120-0590-0435	0056-0514-0646	0072-0498-0648		0088-0507-0645	0100-0507-0645	0088-0664-0541	0096-0649-0537	0048-0504-0439	0068-0526-0450	0068-0523-0448	0074-0538-0431	0096-0543-0438	0101-0527-0428	0068-0633-0590	0077-0635-0584	0088-0643-0569	0088-0643-0569	0104-0643-0575	0116-0652-0575
	Relative Distance between measure points (µm)	-1.548					468.618				541.718	517.764			655.474	625.227		682.309	582.358
		-1.4835	611.569	517.77	543.703	509.601	486.471	468.618		477.643	559.958	533.523	624.183	694.714	683.797	654.693	618.236	672.49	579.44	675.585	579.763	529.204	537.158	587.284	538.242	618.714		551.449	551.449	523.368	525.496
		-1.419	577.787	520.992	542.069	542.292	502.228	486.471	488.498	467.318	564.169	532.304	609.122	715.742	688.356	671.276	602.786	625.249	594.739	640.982	597.71	545.679	552.985	623.075	547.931	618.049	590.977	561.956	561.956	523.641	536.776
		-1.3545	563.511	516.819	538.167	571.767	463.05	502.228	489.702	456.938	594.308	536.35	626.951	728.085	711.233	682.357	605.792	599.622	568.666	658.184	570.823	539.286	569.171	629.909	574.499	619.756	599.75	563.447	563.447	532.627	562.549
		-1.29	540.305	525.59	536.946	534.05	456.561	463.05	477.487	469.515	626.575	549.134	623.465	743.555	708.411	745.216	611.222	585.97	591.034	691.793	537.939	521.343	590.137	596.575	587.862	587.177	633.87	564.123	564.123	556.244	617.422
		-1.2255	566.466	566.189	545.509	569.981	472.315	456.561	485.991	465.556	607.072	528.344	594.975	776.16	715.803	775.983	644.645	568.363	606.944	711.74	534.407	528.026	580.128	572.761	593.323	545.479	652.397	541.365	541.365	541.03	619.116
		-1.161	539.734	575.737	543.34	574.793	478.052	472.315	467.738	483.326	620.132	548.144	604.437	778.635	732.568	752.07	644.615	602.603	633.671	679.234	514.795	531.6	579.923	551.051	562.078	535.119	633.447	563.011	563.011	557.226	606.134
		-1.0965	526.193	577.96	564.875	569.631	455.887	478.052	487.027	463.971	595.113	553.086	567.65	775.248	687.446	726.759	702.724	625.048	596.475	635.536	519.79	528.494	560.532	546.527	549.066	536.956	597.346	573.523	573.523	573.763	632.399
		-1.032	533.551	588.046	550.49	544.738	461.571	455.887	473.927	475.158	579.15	565.342	593.419	730.878	664.185	673.1	696.463	627.191	596.848	583.707	516.395	532.279	536.339	562.341	557.48	537.357	579.574	587.771	587.771	585.606	631.781
		-0.9675	496.354	547.203	573.572	517.515	469.535	461.571	476.251	490.823	569.479	563.116	616.892	661.612	609.764	652.234	717.962	644.405	592.315	542.422	553.244	538.323	535.465	611.605	533.735	536.031	577.589	556.57	556.57	603.787	629.614
		-0.903	521.43	557.397	564.356	522.216	485.063	469.535	475.998	475.802	553.289	546.895	644.838	639.477	612.16	614.833	696.996	601.581	594.976	517.206	553.353	563.196	540.705	597.365	523.46	582.994	569.237	525.253	525.253	648.242	602.434
		-0.8385	527.135	549.321	543.165	522.861	480.779	485.063	480.758	480.028	550.208	542.191	633	617.145	638.653	595.874	683.356	550.898	569.402	482.134	563.973	580.327	548.038	584.908	505.695	571.794	583.415	538.881	538.881	602.166	549.762
		-0.774	533.08	546.27	543.371	485.377	474.857	480.779	486.387	477.743	524.344	546.014	678.285	617.327	643.173	600.599	651.235	547.055	542.843	509.321	595.962	626.713	579.976	568.7	502.931	563.376	615.965	561.82	561.82	602.664	571.58
		-0.7095	532.453	563.694	535.065	455.92	484.371	474.857	471.957	506.267	510.438	546.106	755.4	605.08	635.252	594.322	635.633	567.386	537.23	484.867	573.052	604.17	619.77	541.195	527.062	590.855	617.862	578.241	578.241	614.368	578.305
		-0.645	557.62	617.847	533.391	461.738	505.593	484.371	481.863	528.461	500.664	517.953	802.789	595.065	630.155	601.962	576.619	575.817	512.536	483.428	598.345	594.099	655.473	550.255	560.147	614.113	646.345	581.108	581.108	585.762	601.209
		-0.5805	558.629	633.878	551.11	457.979	513.302	505.593	465.199	508.89	521.351	501.373	774.145	633.614	643.107	597.542	583.254	595.119	526.435	478.194	575.052	559.135	656.492	523.953	546.752	641.179	629.746	596.885	596.885	594.671	594.931
		-0.516	562.314	670.91	543.47	477.176	505.591	513.302	482.991	524.306	568.176	487.044	690.638	665.475	660.823	620.831	568.909	646.439	529.067	489.573	595.426	554.684	652.42	538.526	554.907	629.875	610.737	587.812	587.812	566.141	588.483
		-0.4515	531.49	698.334	539.515	450.335	493.355	505.591	478.848	481.878	564.37	514.698	636.368	648.354	657.235	618.9	589.27	699.451	555.204	467.426	566.382	547.854	594.386	580.331	547.849	595.458	657.687	602.674	602.674	560.051	609.108
		-0.387	522.856	683.54	535.33	447.243	502.282	493.355	480.27	500.875	565.114	502.674	573.044	689.88	639.102	614.065	580.339	703.894	532.813	505.268	554.096	533.5	564.775	575.681	570.08	582.181	625.157	590.816	590.816	537.146	593.359
		-0.3225	539.746	640.96	542.566	459.049	503.354	502.282	470.037	474.261	556.88	510.686	579.444	669.324	675.806	576.077	574.563	696.892	543.4	525.968	531.768	531.969	582.851	549.302	548.732	598.513	626.54	607.629	607.629	552.076	594.281
		-0.258	530.208	583.488	573.689	445.079	495.279	503.354	493.79	437.04	552.457	507.205	607.657	716.555	626.96	572.35	590.667	676.383	525.208	534.628	550.746	550.821	575.688	537.52	547.441	565.379	645.272	622.811	622.811	570.573	589.453
		-0.1935	538.241	572.895	599.287	450.918	485.547	495.279	492.656	480.207	521.302	523.84	603.832	697.326	622.512	588.677	595.364	668.76	517.097	523.068	528.416	559.379	559.762	552.068	614.433	563.483	614.302	609.002	609.002	590.378	565.274
		-0.129	565.649	574.542	599.433	472.245	512.284	485.547	501.158	464.656	524.206	520.814	642.861	663.266	640.474	599.289	602.763	668.406	537.768	525.093	522.997	531.399	582.971	578.74	674.841	581.909	608.086	607.045	607.045	609.631	569.07
		-0.0645	538.902	585.553	626.902	489.905	508.057	512.284	508.824	463.795	513.882	533.064	622.975	640.635	633.976	614.888	568.227	653.274	523.563	543.144	524.186	546.616	631.484	582.62	745.623	607.754	625.563	597.616	597.616	594.429	594.532
		0	525.073	606.686	625.596	496.414	504.444	508.057	507.585	479.689	521.933	549.942	604.783	623.683	619.895	626.268	565.157	673.828	515.46	525.226	522.057	557.626	661.751	581.267	829.052	613.776	647.568	616.588	616.588	601.396	530.777
		0.0645	525.647	601.247	603.985	480.582	526.691	504.444	509.006	473.605	534.537	558.358	633.216	604.177	662.349	619.999	583.809	641.539	539.053	514.316	545.174	554.052	671.156	557.462	816.055	606.214	659.891	615.352	615.352	598.477	540.193
		0.129	530.446	611.761	586.277	479.535	532.442	526.691	476.13	478.005	539.997	561.705	663.305	615.446	615.235	610.814	610.977	657.488	559.24	516.74	548.289	573.157	675.305	536.146	769.22	619.566	642.531	614.249	614.249	597.527	551.856
		0.1935	526.732	587.389	560.392	499.68	535.559	532.442	451.557	474.426	552.686	535.176	658.966	621.482	609.146	575.26	620.459	690.103	556.947	514.873	601.123	569.881	646.171	546.313	686.107	592.65	590.9	570.394	570.394	616.855	558.821
		0.258	539.109	557.422	566.872	517.877	526.683	535.559	460.462	477.416	543.619	547.273	643.219	680.641	642.948	591.747	605.975	724.306	534.163	513.313	651.808	609.237	647.958	571.444	600.385	594.835	597.95	580.871	580.871	621.039	545.82
		0.3225	546.96	543.699	540.526	545.371	508.111	526.683	457.909	487.577	540.801	553.809	603.115	751.196	662.285	607.627	589.998	657.111	583.594	508.758	702.262	629.792	602.454	646.337	582.066	583.489	597.674	555.003	555.003	639.322	533.633
		0.387	551.538	579.963	542.383	551.526	507.889	508.111	450.842	489.124	526.321	576.558	695.611	858.636	654.575	625.992	597.558	631.329	551.056	517.615	732.864	658.108	585.97	678.383	589.791	551.113	610.137	543.226	543.226	634.662	568.173
		0.4515	570.742	590.044	524.405	535.623	530.351	507.889	449.131	511.159	536.704	618.282	740.838	841.273	649.488	667.307	615.665	597.308	547.12	528.988	795.172	728.02	534.295	669.584	549.54	539.105	628.141	559.8	559.8	610.813	587.793
		0.516	595.597	562.376	538.75	523.057	521.005	530.351	449.127	527.316	539.586	614.365	810.312	746.641	681.597	685.079	633.632	605.367	552.677	536.391	825.02	765.122	525.916	627.858	553.028	538.416	581.669	561.605	561.605	605.166	615.899
		0.5805	623.034	576.352	546.433	501.794	511.016	521.005	448.035	519.935	541.56	625.436	829.369	672.817	675.905	684.502	666.424	622.309	559.355	554.724	865.351	777.208	503.653	594.766	565.964	545.224	589.476	544.51	544.51	593.914	625.562
		0.645	611.283	585.62	564.628	485.804	529.523	511.016	467.503	504.918	548.399	628.145	806.446	634.053	630.121	670.172	698.261	596.007	549.347	584.034	821.616	753.749	533.982	566.525	552.376	539.711	595.416	530.296	530.296	561.824	612.652
		0.7095	627.478	600.736	599.628	464.854	547.672	529.523	466.26	505.184	575.921	651.914	764.6	602.968	640.168	686.33	678.875	594.908	578.006	608.477	739.476	723.698	540.397	537.357	552.65	529.638	598.293	559.341	559.341	561.791	594.237
		0.774	608.944	638.382	609.926	454.741	552.616	547.672	462.911	521.207	571.726	641.159	746.888	640.062	656.916	685.928	665.876	571.134	558.816	651.461	668.923	673.829	536.481	511.962	543.383	561.513	550.456	563.1	563.1	591.189	565.777
		0.8385	559.603	632.695	616.52	451.883	545.042	552.616	473.358	520.586	571.092	616.934	680.107	635.667	687.887	700.303	691.351	554.579	578.668	647.514	692.143	674.992	521.432	532.192	554.95	599.142	571.807	588.118	588.118	548.284	566.175
		0.903	540.282	631.2	609.362	448.203	537.358	545.042	505.971	528.707	555.462	585.449	619.328	652.184	699.062	654.433	703.341	587.77	594.961	636.458	700.015	718.882	548.338	540.294	553.402	653.204	558.451	627.574	627.574	536.041	600.967
		0.9675	542.959	624.737	595.73	464.898	518.458	537.358	504.69	560.069	551.853	555.246	591.123	647.666	694.022	646.389	705.553	616.215	608.522	601.171	719.223	743.251	543.688	570.014	552.444	700.142	588.444	630.155	630.155	570.591	660.813
		1.032	570.86	637.086	601.127	464.935	496.218	518.458	481.209	551.336	552.043	540.183	623.719	649.959	688.456	617.593	697.344	591.142	613.567	605.681	686.094	715.146	543.547	573.212	533.868	705.105	581.682	645.032	645.032	577.805	680.479
		1.0965	568.14	640.079	585.576	477.775	496.732	496.218	488.222	523.428	567.539	550.232	630.242	667.177	637.359	619.957	682.294	601.85	576.354	612.121	680.544	722.692	547.126	573.642	522.638	776.932	628.128	609.704	609.704	567.165	669.064
		1.161	558.062	594.084	575.968	493.108	493.518	496.732	511.229	514.095	571.886	565.862	657.288	708.818	608.26	615.017	694.558	578.515	590.547	636.367	638.038	694.661	561.072	544.286	513.378	761.667	615.86	592.428	592.428	557.357	638.922
		1.2255	552.959	593.886	596.365	483.198	476.748	493.518	516.316	535.589	592.996	587.548	705.79	715.335	599.583	638.832	696.35	570.834	587.01	690.645	630.922	662.381	559.025	541.023	524.133	717.736	590.891	564.743	564.743	567.394	624.92
		1.29	500.536	537.477	582.164	487.257	455.742	476.748	509.798	530.127	571.417	615.142	793.303	727.806	629.71	612.081	662.053	545.365	591.213	708.44	643.042	654.624	561.486	548.248	527.57	675.99	577.943	565.851	565.851	560.136	592.617
		1.3545	512.777	551.167	555.144	495.467	431.963	455.742	504.312	547.03	562.153	634.05	803.574	722.481	596.175	593.032	672.332	535.996	595.899	710.425	594.224	596.162	556.33	545.464	524.314	594.87	592.291	561.883	561.883	569.126	555.161
		1.419	501.136	528.457	558.163	477.073	447.287	431.963	496.632	523.188	581.084	606.068	801.778	760.091	592.051	599.505	628.104	534.403	638.752	688.595	580.722	542.328	564.311	538.172	519.553	551.695	615.476	581.625	581.625	588.123	570.751
		1.4835	497.72	521.485	593.007	468.097	465.948	447.287	463.621	493.514	552.341		749.596	772.636	617.404	578.416	622.242	531.254	608.005	673.526	555.369	535.64	549.013	563.181	538.731	546.013	591.687	592.009	592.009	594.539	578.536
		1.548	533.899	501.173	610.316			465.948	469.32	501.488			688.957	712.746			622.802			621.455	568.474	545.565	534.364	520.831	577.196		574.212
		1.6125
		Average Noise Intensity of channel 4	548.682	584.378	567.887	495.344	497.146	497.146	480.819	496.524	556	558.436	671.913	686.85	651.396	637.119	636.513	616.568	567.883	579.079	613.887	605.373	575.872	569.964	575.958	598.324	606.763	579.665	579.665	580.769	590.057
Corrected signal Intensity channel 4 Signal/Average noise
		image name:	N2_dm1_bub1_cls2_NM_20220525_02						N2_dm1_bub1_cls2_NM_20220525_05					N2_dm1_bub1_cls2_NM_20220525_07			N2_dm1_bub1_cls2_NM_20220525_09						N2_dm1_bub1_cls2_NM_20220525_11					N2_dm1_bub1_cls2_NM_20220525_15					Average intensity/noise
		MEASURED SAMPLE # (measurable chromosome)	1	2	3	4	5	6	1	2	3	4	5	1	2	3	1	2	3	4	5	6	1	2	3	4	5	1	2	3	4
	Distance relative to ring Max int (µm)	-1.548	0	0	0	0	1.06415	0	0	0	1.11192	1.11428	0	0	1.34429	1.33861	0	1.19771	1.3062	0	0	0	0	0	0	0	0	0	0	0	0		0.292316
		-1.4835	1.20551	1.15863	1.60674	0.959334	1.04392	1.33395	0	1.1648	1.08492	1.1186	0.957177	1.32934	1.46335	1.39075	1.32382	1.25936	1.36938	1.13513	1.54328	1.41801	1.34685	1.1587	1.37427	1.57476	0	1.46336	1.54029	1.37649	1.10227		1.2001
		-1.419	1.20731	1.1741	1.56016	0.953481	1.06123	1.45919	1.09871	1.16299	1.1	1.15407	0.923601	1.43956	1.45117	1.47512	1.28572	1.28577	1.50022	1.20607	1.48774	1.44675	1.26513	1.14543	1.35376	1.61133	1.55406	1.41225	1.56387	1.37556	1.25466		1.30928
		-1.3545	1.27515	1.2248	1.46527	0.985011	1.03893	1.68232	1.10231	1.15168	1.02788	1.20351	0.906099	1.41966	1.60007	1.63778	1.30829	1.41117	1.64435	1.37535	1.35948	1.40629	1.29431	1.12259	1.31906	1.55797	1.65212	1.46091	1.5594	1.50438	1.38961		1.34778
		-1.29	1.27553	1.19717	1.47707	1.00508	1.03758	1.95982	1.15692	1.17444	0.981647	1.30531	0.887897	1.43387	1.66512	1.85209	1.33319	1.53341	1.75653	1.62535	1.29231	1.43603	1.33509	1.1771	1.31146	1.56318	1.74639	1.51057	1.60974	1.69834	1.45811		1.40677
		-1.2255	1.31717	1.17091	1.59064	0.960777	1.06455	2.12302	1.22	1.21709	1.07254	1.43344	0.892675	1.4503	1.80648	2.13946	1.41715	1.60779	1.83333	1.95307	1.35412	1.41108	1.49984	1.32222	1.30352	1.7129	1.80214	1.63853	1.81084	1.9436	1.65843		1.50785
		-1.161	1.46363	1.23119	1.78804	0.979128	1.11066	2.07796	1.20225	1.20611	1.11144	1.54223	0.915445	1.56062	1.8954	2.21627	1.565	1.60878	1.90269	2.32424	1.46338	1.48283	1.64148	1.53166	1.31455	1.79194	1.94985	1.84089	2.22425	2.11326	1.97274		1.62165
		-1.0965	1.6446	1.4219	2.06673	1.0043	1.15959	1.9464	1.19165	1.27147	1.18756	1.60013	0.991735	1.61187	1.97488	2.18593	1.75545	1.54649	1.96002	2.69493	1.56076	1.51957	1.82639	1.89153	1.35603	1.91352	2.11543	2.01366	2.50005	2.27091	2.22616		1.73826
		-1.032	1.80483	1.59488	2.21296	1.00427	1.165	1.82483	1.2003	1.3402	1.23967	1.59639	1.02553	1.63442	1.98339	1.93629	2.079	1.55704	1.71742	2.6794	1.70496	1.61508	2.04632	2.18273	1.52718	1.97353	2.41302	2.12033	2.63247	2.31025	2.39823		1.81103
		-0.9675	1.91996	1.76247	2.26449	1.06933	1.17913	1.62386	1.23767	1.4141	1.31977	1.58085	1.06658	1.92831	1.94781	1.75229	2.37865	1.53338	1.6518	2.58578	1.96309	1.77496	2.43189	2.31708	1.6606	1.99482	2.65087	2.06928	2.67558	2.25858	2.41404		1.87679
		-0.903	1.91275	1.68056	2.17852	1.16345	1.17503	1.49707	1.16333	1.47143	1.44688	1.55728	1.14604	2.17467	1.9369	1.50225	2.44257	1.5638	1.61905	2.31943	2.34366	2.04919	2.75693	2.29451	1.71322	2.09333	2.6727	2.04403	2.54106	2.27199	2.22075		1.89491
		-0.8385	1.82386	1.57742	2.03081	1.16539	1.13071	1.51895	1.22339	1.54663	1.4729	1.50776	1.14494	2.40596	1.97926	1.4166	2.3345	1.47688	1.58532	2.03316	2.67275	2.2893	2.98301	2.02052	1.79879	2.07079	2.47779	1.92238	2.46714	2.26375	2.05668		1.87577
		-0.774	1.72719	1.63776	2.01654	1.26437	1.15112	1.49849	1.27426	1.48851	1.48758	1.48403	1.22604	2.32074	1.86291	1.41005	2.168	1.42822	1.5653	1.87765	2.61052	2.25404	2.74071	1.73998	1.76001	2.06622	2.28939	1.81844	2.25099	2.18112	1.90463		1.81051
		-0.7095	1.55175	1.6092	1.93924	1.27386	1.09708	1.51938	1.25637	1.45091	1.51722	1.4953	1.32785	2.13245	1.83394	1.38293	1.9753	1.31832	1.61475	1.83297	2.41786	1.93343	2.33888	1.60534	1.67644	2.04776	2.22461	1.78188	2.06363	2.15524	1.94781		1.73523
		-0.645	1.50916	1.49961	1.88481	1.30926	1.10758	1.54388	1.29179	1.38308	1.47331	1.60023	1.38702	2.1617	1.80799	1.43397	1.79812	1.24258	1.57558	1.75311	2.05681	1.63082	1.96695	1.51896	1.52531	2.01627	1.98607	1.73916	2.04084	2.05752	1.98889		1.66519
		-0.5805	1.55928	1.41358	1.84054	1.36378	1.14041	1.5434	1.18808	1.32541	1.41731	1.63366	1.44575	2.19614	1.73567	1.43572	1.5932	1.23778	1.67053	1.67557	1.76284	1.44773	1.8681	1.49204	1.50066	2.00299	1.91765	1.77273	1.87278	2.12272	2.00669		1.62699
		-0.516	1.70982	1.38616	1.70996	1.4077	1.08069	1.55235	1.13735	1.35449	1.41322	1.64245	1.44222	2.37011	1.71925	1.55822	1.63674	1.30822	1.87692	1.70712	1.62518	1.43864	1.76452	1.60562	1.45398	1.98113	1.74607	1.77517	1.89041	2.02845	1.97764		1.63103
		-0.4515	1.89202	1.35262	1.74734	1.49896	1.11717	1.63794	1.19773	1.34907	1.51168	1.74351	1.54642	2.44898	1.77898	1.77746	1.76049	1.38353	1.9415	1.73293	1.52345	1.55661	1.74463	1.58843	1.4705	1.98138	1.71853	1.91953	1.97645	2.12014	1.91646		1.6874
		-0.387	2.10481	1.37768	1.84036	1.5137	1.15945	1.66207	1.31439	1.41002	1.42869	1.76531	1.58053	2.46754	1.83422	1.95609	1.87701	1.43661	1.81622	1.75983	1.53962	1.73108	1.73307	1.52381	1.5241	2.09058	1.69824	2.10504	2.05922	2.13253	1.93449		1.73711
		-0.3225	2.26772	1.41179	2.03469	1.50496	1.21754	1.71285	1.27682	1.48037	1.47449	1.86703	1.60687	2.34098	1.94432	2.13994	1.82036	1.45328	1.72324	1.79336	1.59442	1.83671	1.8056	1.5104	1.58552	2.24987	1.82637	2.19019	2.04191	2.18983	2.15966		1.79521
		-0.258	2.33784	1.57682	2.25542	1.6215	1.28289	1.64065	1.35939	1.43605	1.44406	1.91598	1.73838	2.2783	2.10337	2.19948	1.83693	1.52581	1.63584	1.7698	1.55352	2.00355	1.9128	1.50983	1.69139	2.45557	2.11148	2.30898	2.09276	2.11876	2.24199		1.86066
		-0.1935	2.34365	1.80949	2.54584	1.67029	1.38082	1.66129	1.41667	1.44194	1.44391	1.9794	1.81425	2.45256	2.21216	2.08911	1.92339	1.5671	1.59071	1.9167	1.58955	1.97675	2.06076	1.53546	1.67041	2.67932	2.42538	2.45054	2.08773	2.10125	2.45937		1.94123
		-0.129	2.48215	2.11611	2.76714	1.90135	1.60267	1.75274	1.5343	1.42499	1.53399	2.17908	1.88544	2.83745	2.36853	2.03041	2.00005	1.73073	1.5625	2.15808	1.6007	1.86909	2.13502	1.60315	1.70515	2.89974	2.64107	2.61233	2.18138	2.14412	2.57119		2.06313
		-0.0645	2.51882	2.2599	2.8406	2.01035	1.67673	1.76553	1.59905	1.45395	1.60976	2.36263	1.95774	3.08481	2.46536	1.92342	2.13206	1.90851	1.63305	2.33079	1.59452	1.85004	2.32318	1.66618	1.76314	2.99414	2.73988	2.54849	2.29521	2.32391	2.64502		2.14747
		0	2.54309	2.40648	2.80177	2.08935	1.81703	1.85219	1.58567	1.47543	1.70553	2.45238	2.14124	3.11442	2.4305	1.79055	2.23648	2.04602	1.66331	2.47727	1.51152	1.80563	2.31909	1.73614	1.81903	2.9292	2.7802	2.38322	2.37825	2.44801	2.75607		2.18949
		0.0645	2.47444	2.28568	2.65539	1.98983	1.91458	2.02411	1.49361	1.48886	1.72223	2.41679	2.3491	2.7823	2.30717	1.70523	2.31529	2.00965	1.68417	2.49847	1.47443	1.76574	2.26236	1.8012	1.84574	2.68134	2.70329	2.24511	2.34349	2.55082	2.79709		2.15819
		0.129	2.44262	2.06313	2.53767	2.006	1.93169	2.19366	1.40215	1.3807	1.64055	2.26253	2.51296	2.25776	2.09743	1.64756	2.22339	1.86712	1.73027	2.51557	1.43301	1.78068	2.15988	1.82361	1.89597	2.48145	2.6206	2.09491	2.36042	2.51598	2.60856		2.08579
		0.1935	2.36607	1.835	2.32008	1.87392	1.86227	2.13713	1.35372	1.36795	1.66594	2.0852	2.73165	1.9428	1.84442	1.54482	2.24829	1.77857	1.72574	2.16129	1.34037	1.63419	2.09984	1.77263	1.82711	2.41895	2.49337	2.00521	2.36568	2.39875	2.49227		1.98942
		0.258	2.11303	1.64187	2.22043	1.69628	1.6806	1.99046	1.29937	1.26294	1.64242	1.85808	2.92203	1.73246	1.65937	1.49087	2.17431	1.57425	1.76252	1.95817	1.29481	1.53954	2.07781	1.64162	1.95567	2.27448	2.28708	1.82245	2.35319	2.2501	2.23246		1.87616
		0.3225	1.91151	1.40469	2.11589	1.57435	1.54787	1.80929	1.23895	1.27044	1.59871	1.62454	2.86832	1.62392	1.6174	1.50939	2.0205	1.4269	1.69138	1.6746	1.2345	1.45399	2.08791	1.53575	2.01279	2.06442	2.11178	1.69978	2.3175	2.18906	2.11241		1.77064
		0.387	1.70015	1.3646	2.08499	1.50082	1.49081	1.61416	1.13895	1.26229	1.49587	1.51687	2.62564	1.63736	1.66826	1.52334	1.82124	1.2879	1.5759	1.48133	1.15613	1.40132	2.00891	1.45968	2.13619	1.90632	1.94772	1.6735	2.24566	2.07826	2.20843		1.69009
		0.4515	1.71868	1.37267	2.18254	1.5013	1.43217	1.51403	1.16636	1.23046	1.47395	1.51611	2.30559	1.70866	1.6775	1.45354	1.68052	1.22266	1.48779	1.44593	1.18593	1.41108	2.00984	1.51943	2.08209	1.93979	1.78036	1.64984	2.26958	1.94235	2.01674		1.65164
		0.516	1.64573	1.43889	2.14391	1.52418	1.3815	1.36958	1.15655	1.28916	1.39326	1.56502	2.00078	1.66664	1.66877	1.42882	1.52833	1.17157	1.4412	1.42866	1.30399	1.42824	1.97396	1.45627	1.97009	1.87233	1.77961	1.60807	2.25774	1.85565	1.95729		1.61054
		0.5805	1.64802	1.55296	2.13612	1.63871	1.32265	1.33285	1.21261	1.27989	1.47486	1.55018	1.81465	1.66955	1.70617	1.40799	1.43109	1.25862	1.37386	1.41196	1.47422	1.47324	1.96701	1.46952	1.952	1.71019	1.66489	1.61303	2.16513	1.836	1.93051		1.60271
		0.645	1.61948	1.71252	2.01694	1.58276	1.24365	1.32375	1.25035	1.4042	1.58838	1.53681	1.81526	1.64411	1.69377	1.33617	1.39823	1.26834	1.45234	1.4532	1.676	1.51124	1.91906	1.47077	1.98417	1.65048	1.63994	1.63048	2.11478	1.80012	1.96917		1.61057
		0.7095	1.72023	1.9429	1.97022	1.51224	1.18878	1.35864	1.30094	1.30758	1.7026	1.52478	1.93294	1.65875	1.64782	1.34316	1.44626	1.3256	1.49545	1.45367	1.8875	1.62012	2.00148	1.53842	1.95545	1.61258	1.78034	1.69747	2.11907	1.87308	2.02425		1.65318
		0.774	1.88411	2.06104	2.08416	1.44915	1.16031	1.3628	1.28126	1.3231	1.77119	1.55763	1.9975	1.74733	1.7288	1.38491	1.50841	1.4384	1.44602	1.54661	2.03896	1.7426	2.19983	1.60633	1.9586	1.5075	1.84403	1.73403	2.04714	2.09277	2.1429		1.71198
		0.8385	1.97244	2.08269	2.17711	1.41611	1.16284	1.32997	1.28579	1.25435	1.76666	1.49187	1.98863	1.7346	1.87887	1.39686	1.74311	1.59259	1.40775	1.55024	2.10641	2.02521	2.4111	1.71008	1.9298	1.61081	1.95224	1.88016	2.10617	2.34047	2.1846		1.7755
		0.903	2.41861	1.90757	2.3629	1.48387	1.17941	1.32233	1.27852	1.13154	1.63069	1.48737	1.85004	1.73729	1.97155	1.40548	2.03584	1.67178	1.43922	1.66255	1.95023	2.42686	2.61812	1.86911	1.92995	1.70959	2.05209	2.10115	2.17568	2.43703	2.25397		1.84484
		0.9675	2.6823	1.64182	2.45365	1.41701	1.20964	1.31234	1.32161	1.149	1.53191	1.54632	1.58132	1.82356	2.01137	1.40521	2.28891	1.59572	1.42969	1.79812	1.8123	2.61954	2.53284	2.02632	1.84752	1.74635	2.02062	2.13675	2.30013	2.53896	2.22814		1.86238
		1.032	3.0884	1.33467	2.45488	1.42681	1.1891	1.35546	1.30621	1.07924	1.4068	1.56654	1.42429	1.8502	1.9797	1.32956	2.4475	1.55674	1.43959	2.0057	1.60297	2.68628	2.36122	2.08889	1.81555	1.80284	2.02526	2.08313	2.46504	2.34974	2.05736		1.84758
		1.0965	3.01125	1.19012	2.34154	1.3627	1.07929	1.38627	1.2302	1.08653	1.37257	1.47966	1.29351	1.73044	1.91772	1.28789	2.28368	1.42302	1.34934	2.03725	1.52059	2.49476	2.15433	2.07354	1.61562	1.62135	1.98412	2.00282	2.73402	2.22134	1.98991		1.76812
		1.161	2.69901	1.09817	2.13468	1.34993	1.0337	1.37152	1.18884	1.08758	1.34191	1.51658	1.25323	1.6608	1.7849	1.20311	2.00886	1.29293	1.38935	1.88725	1.55228	2.14473	1.86393	1.95104	1.51219	1.49783	1.91449	1.86113	2.82191	2.06567	1.92302		1.66933
		1.2255	2.32178	1.04114	1.94896	1.26129	0.968902	1.29347	1.18847	1.05264	1.3212	1.43457	1.28575	1.53146	1.57932	1.22944	1.79338	1.20492	1.25134	1.68891	1.61963	1.78636	1.70251	1.83752	1.41152	1.46307	1.79094	1.79299	2.7626	2.03369	1.76168		1.56412
		1.29	2.0776	1.01668	1.72001	1.16778	0.983067	1.27135	1.11909	1.06301	1.33066	1.37759	1.36498	1.35992	1.44892	1.31407	1.59768	1.16513	1.23562	1.48373	1.64286	1.5459	1.63566	1.59093	1.40492	1.45871	1.77626	1.68203	2.68037	1.85672	1.6897		1.48486
		1.3545	1.91184	1.00987	1.49928	1.19445	0.976548	1.22508	1.08118	1.02792	1.32007	1.35367	1.34875	1.30039	1.30464	1.36688	1.54835	1.07919	1.25966	1.36334	1.61491	1.42617	1.59842	1.41239	1.40694	1.47457	1.65106	1.53181	2.48242	1.6542	1.61201		1.41503
		1.419	1.89862	0.968014	1.34139	1.11235	1.01132	1.14534	1.03408	1.02534	1.30753	1.40371	1.27427	1.34617	1.28463	1.35043	1.56973	0.980649	1.25852	1.28022	1.52941	1.28646	1.59003	1.38592	1.41947	1.44063	1.60373	1.4089	2.13303	1.59498	1.62176		1.36575
		1.4835	1.95499	0.993869	1.20408	1.09594	0.991875	1.05387	1.00975	0.996348	1.22948	0	1.28517	1.30502	1.26334	1.33695	1.5376	0.919735	1.19334	1.19512	1.46209	1.24892	1.53898	1.45517	1.57332	1.5106	1.56805	1.34154	1.94551	1.56868	1.63244		1.29006
		1.548	1.81752	1.01511	1.21407	0	0	1.06255	1.02104	0.97907	0	0	1.33294	1.35379	0	0	1.49529	0	0	1.21854	1.37895	1.26043	1.53474	1.55358	1.68674	0	1.57701	0	0	0	0		0.741427
		1.6125	0	0	0	0	0	0	0	0	0	0	0	0	0	0	0	0	0	0	0	0	0	0	0	0	0	0	0	0	0		0

## Sheet: Analysis
CLS-2 corrected signal intensity at cups Signal/Average Noise Values			Descriptive statistics and test
									AVERAGE SIGNAL REDUCTION RELATIVE TO CONTROL
Control	bub-3∆		Sample size, column A	58 (n=29 chromosomes, 2 measurements per chromosome)						Control	bub-3∆
4.47457	1.91996		Sample size, column B	58 (n=29 chromosomes, 2 measurements per chromosome)					AVERAGE CORRECTED SIGNAL	4.83834	2.01088
4.56534	1.76247								%	100	41.5613
4.21874	2.26449			Control	bub-3∆				% REDUCTION		58.4387
7.02172	1.27386		Number of values	58	58
4.4727	1.15959
5.2686	2.12302		Minimum	3.1	1.1
5.91836	1.23767		25% Percentile	4.1	1.6
5.58545	1.54663		Median	4.7	2
6.51779	1.51722		75% Percentile	5.4	2.4
5.42129	1.60013		Maximum	7.7	3.1
4.38196	1.22604		Range	4.6	1.9
4.32166	2.40596
3.82481	1.98339		10% Percentile	3.8	1.3
3.59254	2.21627		90% Percentile	6	2.7
4.26516	2.44257
3.38594	1.60878		95% CI of median
5.55833	1.96002		Actual confidence level	95%	95%
5.3138	2.69493		Lower confidence limit	4.3	1.9
3.52423	2.67275		Upper confidence limit	5.1	2.1
4.04919	2.2893
4.06617	2.98301		Mean	4.8	2
5.13628	2.31708		Std. Deviation	0.97	0.5
5.64433	1.79879		Std. Error of Mean	0.13	0.065
4.87354	1.99482
4.88033	2.6727		Lower 95% CI of mean	4.6	1.9
4.23785	2.12033		Upper 95% CI of mean	5.1	2.1
4.02841	2.67558
4.74349	2.31025		Coefficient of variation	20%	25%
3.97276	2.41404
5.54668	3.0884		Geometric mean	4.7	1.9
5.59125	2.08269		Geometric SD factor	1.2	1.3
3.77567	2.45488
5.34187	1.51224		Lower 95% CI of geo. mean	4.5	1.8
5.22749	1.20964		Upper 95% CI of geo. mean	5	2.1
3.84236	1.38627
4.13642	1.32161		Sum	281	117
7.68763	1.149
4.80944	1.77119		Unpaired t test
7.29975	1.56654		P value	<0,0001
6.70441	1.9975		P value summary	****
3.09119	1.8502		Significantly different (P < 0.05)?	Yes
5.57706	2.01137		One- or two-tailed P value?	Two-tailed
5.34313	1.40548		t, df	t=19,79, df=114
4.4362	2.4475
4.24604	1.67178		How big is the difference?
4.03015	1.43959		Mean of column A	4.838
3.68775	2.03725		Mean of column B	2.011
4.16279	2.10641		Difference between means (B - A) ± SEM	-2,827 ± 0,1429
5.11614	2.68628		95% confidence interval	-3,110 to -2,544
5.68214	2.61812		R squared (eta squared)	0.7746
4.13381	2.08889
4.6275	1.92995		F test to compare variances
4.80432	1.80284		F, DFn, Dfd	3,798, 57, 57
4.74935	2.05209		P value	<0,0001
5.04057	2.13675		P value summary	****
5.11955	2.82191		Significantly different (P < 0.05)?	Yes
4.01866	2.53896
5.52928	2.25397		Data analyzed
			Sample size, column A	58
			Sample size, column B	58
