# Supplementary material for: Synergistic stabilization of microtubules by BUB-1, HCP-1, and CLS-2 controls microtubule pausing and meiotic spindle assembly
Source: eLife. 2023 Feb 17;12:e82579. doi: 10.7554/eLife.82579 (PMC10005782; doi:10.7554/eLife.82579)
Supplement: Figure 1—figure supplement 1—source data 4. — Quantification of HCP-1 signal at kinetochores in bub-3(ok3437) mutants (bub-3∆) compared to controls. Signals were measured in Fiji from live imaging of GFP::HCP-1. Details of statistical analyses are provided. [file elife-82579-fig1-figsupp1-data4.xlsx]

## Sheet: GFP_HCP-1 signal
		Signal				Noise					SIGNAL/NOISE			Descriptive statistics				Unpaired t-test Results
		Area	Mean	IntDen	RawIntDen	Area	Mean	IntDen	RawIntDen		intden	a.u. Scaling		Number of values	15	10		Table Analyzed	GFP::HCP-1 signal intensity/ Noise				AVERAGE SIGNAL REDUCTION RELATIVE TO CONTROL
Image #	frame																							Control	bub-3∆
SUM_PHX441_ctrl_30x_4Z_2um_15s_NM_20221007_01	12/22	23	2726.4	62636.6	1355037	23	1357.1	31178.7	674498	Control PHX441	2.00895	0.502239		Minimum	1.9	1.2		Column B	bub-3∆ JDU755				AVERAGE CORRECTED SIGNAL	2.34135	1.49282
SUM_PHX441_ctrl_30x_4Z_2um_15s_NM_20221007_02	1/7	19.5	2801.2	54514.3	1179324	19.5	1419.7	27628.8	597703		1.9731	0.493274		25% Percentile	2	1.4		vs.	vs,				%	100	63.7591
SUM_PHX441_ctrl_30x_4Z_2um_15s_NM_20221007_03	15/30	24.5	2912.1	71479.3	1546334	24.5	1356.8	33303.3	720460		2.14631	0.536578		Median	2.2	1.5		Column A	Control PHX441				% REDUCTION		36.2409
SUM_PHX441_ctrl_30x_4Z_2um_15s_NM_20221007_04_TOP	2/15	22.4	3452.2	77394.7	1674303	22.4	1385.3	31057.5	671877		2.49198	0.622995		75% Percentile	2.6	1.7
SUM_PHX441_ctrl_30x_4Z_2um_15s_NM_20221007_04_BOTTOM	3/15	14.9	3129.5	46725.7	1010832	14.9	1465.5	21880.5	473348		2.1355	0.533874		Maximum	3.4	1.8		Unpaired t test
SUM_PHX441_ctrl_30x_4Z_2um_15s_NM_20221007_06	21/36	22.1	2924.2	64611.6	1397763	22.1	1351.4	29860.7	645985		2.16377	0.540942		Range	1.5	0.54		P value	<0,0001
SUM_PHX441_ctrl_30x_4Z_2um_15s_NM_20221007_07	4/11	19.7	3550	69905.9	1512295	19.7	1390.4	27380.5	592330		2.55313	0.638282						P value summary	****
SUM_PHX441_ctrl_30x_4Z_2um_15s_NM_20221007_08	3/9	17.6	3123.2	55005.8	1189957	17.6	1359.4	23940.9	517921		2.29757	0.574392		10% Percentile	1.9	1.2		Significantly different (P < 0.05)?	Yes
SUM_PHX441_ctrl_30x_4Z_2um_15s_NM_20221007_09	5/13	21	3543.4	74362.7	1608711	21	1380.1	28964	626587		2.56742	0.641855		90% Percentile	3.3	1.8		One- or two-tailed P value?	Two-tailed
SUM_PHX441_ctrl_30x_4Z_2um_15s_NM_20221007_12_LEFT	8/12	14.7	3299.9	48659.4	1052663	14.7	1364.2	20115.7	435169		2.41898	0.604744						t, df	t=5,705, df=23
SUM_PHX441_ctrl_30x_4Z_2um_15s_NM_20221007_12_RIGHT	6/12	17.7	4504.5	79748.3	1725219	17.7	1408.1	24929.1	539298		3.199	0.799751		95% CI of median
SUM_PHX441_ctrl_30x_4Z_2um_15s_NM_20221007_15	10/19	20.3	2774.8	56308.1	1218131	20.3	1357.3	27542.8	595841		2.04439	0.511096		Actual confidence level	96%	98%		How big is the difference?
SUM_PHX441_ctrl_30x_4Z_2um_15s_NM_20221007_16	9/22	19.6	2507	49136.1	1062976	19.6	1340.1	26264.7	568192		1.8708	0.467701		Lower confidence limit	2	1.3		Mean of column A	2.341
SUM_PHX441_ctrl_30x_4Z_2um_15s_NM_20221007_17	8/21	23.4	2560	59996	1297913	23.4	1359.3	31855.7	689145		1.88337	0.470842		Upper confidence limit	2.6	1.7		Mean of column B	1.493
SUM_PHX441_ctrl_30x_4Z_2um_15s_NM_20221007_18	3/12	13.4	4666.8	62343.6	1348698	13.4	1386.4	18521.4	400680		3.36603	0.841508						Difference between means (B - A) ± SEM	-0,8485 ± 0,1487
														Mean	2.3	1.5		95% confidence interval	-1,156 to -0,5409
SUM_JDU755_ctrl_30x_4Z_2um_15s_NM_20221011_01	18/42	15.6	1899.4	29588.2	640090	15.6	1365.9	21278	460313	bub-3∆ JDU755	1.39055	0.347638		Std. Deviation	0.45	0.17		R squared (eta squared)	0.5859
SUM_JDU755_ctrl_30x_4Z_2um_15s_NM_20221011_02	3/27	14.5	2002.3	28970.8	626734	14.5	1367.4	19783.8	427990		1.46437	0.366092		Std. Error of Mean	0.12	0.054
SUM_JDU755_ctrl_30x_4Z_2um_15s_NM_20221011_03	19/35	14.1	2309.4	32559.7	704374	14.1	1386.6	19549.5	422920		1.6655	0.416375						F test to compare variances
SUM_JDU755_ctrl_30x_4Z_2um_15s_NM_20221011_04	14/27	10.9	2559.7	27923.6	604079	10.9	1445.5	15769	341135		1.77079	0.442698		Lower 95% CI of mean	2.1	1.4		F, DFn, Dfd	6,814, 14, 9
SUM_JDU755_ctrl_30x_4Z_2um_15s_NM_20221011_06	18/30	12.8	1924.3	24639.2	533028	12.8	1380.4	17675.6	382381		1.39397	0.348492		Upper 95% CI of mean	2.6	1.6		P value	0.0066
SUM_JDU755_ctrl_30x_4Z_2um_15s_NM_20221011_08	21/38	11.1	1665.7	18479.7	399777	11.1	1354	15021.3	324960		1.23023	0.307558						P value summary	**
SUM_JDU755_ctrl_30x_4Z_2um_15s_NM_20221011_09	21/36	13.2	1843.3	24369.2	527187	13.2	1369.8	18108.6	391749		1.34573	0.336431		Coefficient of variation	19%	11%		Significantly different (P < 0.05)?	Yes
SUM_JDU755_ctrl_30x_4Z_2um_15s_NM_20221011_11	16/28	12.4	1924.7	23933.1	517753	12.4	1339.9	16661	360433		1.43647	0.359119
SUM_JDU755_ctrl_30x_4Z_2um_15s_NM_20221011_12	18/37	13	2301.6	29895.9	646747	13	1361.5	17685.5	382595		1.69042	0.422605		Geometric mean	2.3	1.5		Data analyzed
SUM_JDU755_ctrl_30x_4Z_2um_15s_NM_20221011_13	3/18	8.9	2257.9	20039.4	433519	8.9	1466	13010.8	281466		1.54021	0.385053		Geometric SD factor	1.2	1.1		Sample size, column A	15
																		Sample size, column B	10
														Lower 95% CI of geo. mean	2.1	1.4
														Upper 95% CI of geo. mean	2.5	1.6
														Sum	35	15
