# Supplementary material for: Synergistic stabilization of microtubules by BUB-1, HCP-1, and CLS-2 controls microtubule pausing and meiotic spindle assembly
Source: eLife. 2023 Feb 17;12:e82579. doi: 10.7554/eLife.82579 (PMC10005782; doi:10.7554/eLife.82579)
Supplement: Figure 1—source data 1. — Quantification of BUB-1 signal at kinetochores in bub-3(ok3437) mutants (bub-3∆) and in control N2. Integrated intensity measurements corrected by integrated background noise (Integrated signal intensity/Average noise) of immunolocalized BUB-1 at kinetochores in fixed oocytes of bub-3(ok3437) mutants (bub-3∆) compared to N2 wild type controls. Descriptive statistics and details of unpaired t-test for comparison of samples are provided. [file elife-82579-fig1-data1.xlsx]

## Sheet: Raw data
N2 control
RAW int INTENSITY channel 3 - BUB-1 signal
		image name:	N2_dm1_bub1_cls2_NM_20220525_02						N2_dm1_bub1_cls2_NM_20220525_05					N2_dm1_bub1_cls2_NM_20220525_07			N2_dm1_bub1_cls2_NM_20220525_09						N2_dm1_bub1_cls2_NM_20220525_11					N2_dm1_bub1_cls2_NM_20220525_15
		MEASURED SAMPLE # (measurable chromosome)	1	2	3	4	5	6	1	2	3	4	5	1	2	3	1	2	3	4	5	6	1	2	3	4	5	1	2	3	4
		Line Scan coordinates (ROI)	0089-0557-0254	0077-0571-0265	0084-0578-0293	0104-0576-0284	0104-0583-0265	0077-0582-0245	0125-0555)0495	0112-0544-0510	0100-0559-0536	0135-0557-0517	0092-0545-0526	0071-0589-0474	0077-0585-0514	0081-0586-0494	0079-0580-0476	0080-0568-0488	0104-0588-0483	0104-0571-0498	0124-0594-0468	0124-0576-0483	0163-0571-0356	0181-0554-0366	0181-0580-0369	0205-0547-0357	0215-0564-0361	0085-0494-0406	0097-0514-0421	0113-0488-0402	0116-0497-0418
	Distance relative to ring Max int (µm)	-1.548		1043.88		1393.46		1736.38	1082.91		1894.58				702.72						1153.52	1055.33
		-1.4835		1159.67	816.13	1582.11	1012.72	1747.96	1154.57	1284.34	1814.5	1066.49	1073.65	1607.51	719.49	762.15	1821.94	1492.37		1416.69	1175.56	1079.61		938.85	719.88	964.07	693.96		828.99	1420.73	1831.89
		-1.419	1174.99	1302.01	874.91	1737.36	1076.19	1810.9	1229.56	1403.03	1594.09	1127.19	1154.64	1859.8	763.7	735	1785.3	1537.96	1681.84	1534.94	1272.35	1146.47	541.7	941.91	725.39	965.29	694.22		872.83	1427.36	1804.14
		-1.3545	1032.82	1425.24	865.42	1702.29	1174.87	1813.21	1269.15	1602.85	1383.65	1175.75	1381.11	2083.28	829.31	790.78	1785.27	1635.87	1803.63	1539.05	1351.35	1244.67	557.52	1029.01	764.77	1034.44	770.28	1590.46	903.73	1502.52	1801.58
		-1.29	899.61	1609.45	787.76	1611.78	1317.89	1934.24	1359.67	1831.34	1203.8	1221.17	1589.79	2262.24	1030.6	825.9	1840.65	1854.54	2082.62	1617.43	1472.38	1402.29	622.43	1124.66	798.4	1042.63	775.88	1656.51	944.76	1663.45	1804.63
		-1.2255	872.29	1665.41	757.07	1490.81	1503.67	2121.73	1471.84	2133.61	1101.6	1335.4	1747.61	2426.84	1411.39	914.33	1950.8	2080.51	2362.73	1826.61	1646.99	1619.51	691.04	1315.42	856.59	1088.96	771.12	1792.63	1013.32	1974.07	1767.73
		-1.161	812.34	1689.14	745.54	1442.95	1763.16	2353.27	1663.6	2368.94	1089.61	1450.15	1987.47	2838.87	2054.05	997.55	2095.71	2266.77	2589.13	2026.66	1883.31	1916.68	771.87	1543.63	884.83	1121.43	787.38	1915.79	1179.85	2291.5	1840.66
		-1.0965	800.19	1745.35	804.46	1475.86	2110.87	2676.64	1974.2	2537.87	1276.65	1650.59	2231.74	3495.61	2913.85	1196.41	2194.53	2407.26	2877.03	2322.69	2155.41	2229.39	864.88	1732.54	956.9	1232.55	799.75	2130.05	1519.24	2782.28	2092.21
		-1.032	886.28	1874.22	936.78	1632.33	2219.85	3045.04	2301.45	2591.73	1554.99	2033.1	2446.2	4295.2	3598.76	1649.81	2453.5	2477.62	3100.39	2612.41	2309.62	2393.31	1000.34	1907.75	1125.9	1399.24	835.95	2327.87	1915.91	3145.02	2452.93
		-0.9675	948.61	2146.96	1219.99	2085.29	2239.89	3186.95	2633.94	2586.72	2037.51	2353.25	2608.81	4948.2	3893.06	2394.31	2606.08	2404.71	3179.98	2812.92	2567.44	2519.14	1100.54	1864.14	1306.37	1631.27	936.59	2636.96	2263.53	3193.39	2675.29
		-0.903	1192.05	2651.4	1794.15	2620.68	2113.56	2924.57	2694.6	2376.76	2678.05	2763.37	2632.97	5105.79	3629.66	3181.21	2730.18	2315.02	3194.1	3019.71	2650.91	2548.12	1167.8	1695.86	1481.07	1776.03	1095.32	2837.39	2426.58	3052.95	2783.91
		-0.8385	1677.09	2969.39	2488.81	3108.05	2004.27	2449.03	2618.86	2178.16	3088.97	2914.43	2500.09	4585.1	3098.99	3536.85	2798.93	2217.11	3082.8	3149.71	2626.59	2498.31	1189.23	1588.99	1611.29	1788.85	1192.08	3036.47	2343.83	2809.37	2786.89
		-0.774	2326.23	2940.96	2975.66	3447.63	1901.22	2142.08	2327.64	1951.44	3106.61	2728.73	2342.19	4114.6	2607.84	3499.03	2808.47	2137.73	2918.94	3056.25	2522.04	2543.52	1255.51	1426.27	1696.01	1715.07	1409.8	3076.18	2142.87	2655.93	2665.18
		-0.7095	2908.06	2639.65	3063.53	3287.83	1856.81	1958.31	2136.88	1864.12	2793.85	2398.49	2245.19	3836.13	2426.77	3221.77	2670.68	2106.65	2785.3	2849.93	2421.91	2470.37	1280.15	1335.09	1629.89	1578.95	1555.15	2938.16	1893.62	2453.11	2473.02
		-0.645	3191.46	2303.56	2837.76	2950.29	1841.98	1873.48	2024.71	1785.95	2412.68	2100.18	2225.1	3777.56	2444.32	2918.94	2642.84	2065.42	2593.79	2635.63	2384.99	2458.02	1265.38	1340.77	1586.81	1477.8	1648.27	2862.71	1759.42	2298.45	2320.18
		-0.5805	3039.17	2215.92	2472.85	2577.66	1812.89	1970.54	1912.94	1729.9	2135.57	1924.82	2158.93	3746.28	2486.81	2726.19	2517.89	2062.83	2475.1	2490.44	2392.11	2404.4	1231.6	1322.43	1541.86	1365.57	1635.79	2730.4	1722.67	2245.12	2147.36
		-0.516	2685.63	2250.7	2239.1	2314.25	1828.58	1952.67	1910.11	1736.14	2097.48	1843.52	2079.15	3710.23	2522.23	2595.3	2427.06	2068.6	2388.34	2367.1	2387.97	2430.86	1162.3	1284.69	1430.63	1299.13	1443.43	2655.76	1831.16	2215.78	1971.79
		-0.4515	2361.62	2413.4	2178.85	2208.24	1836.23	2005.96	1995.07	1778.16	2110.82	1987.95	2011.16	3583.5	2512.79	2506.77	2432.15	2194.61	2393.65	2268.89	2472.65	2506.68	1135.51	1302.51	1413.52	1332.91	1288.87	2684.41	1887.24	2077.35	1902.9
		-0.387	2139.18	2351.24	2114.1	2135.34	1932.42	2084.88	2067.46	1806.06	2220.77	2088.12	1980.89	3389.38	2408.01	2562.6	2359.72	2353.05	2344.26	2220.74	2583.32	2603.01	1152.75	1388.47	1364.81	1435.76	1219.46	2759.62	1982.5	2039.94	1888.21
		-0.3225	2020.72	2422.4	2045.68	2172.94	2073.03	2144.46	2217.47	2116.34	2413.96	2315.08	2028.62	3294.32	2423.55	2628.26	2400.62	2619.04	2326.55	2248.49	2701.72	2693.42	1211.65	1461.84	1433.26	1460.93	1157.12	2774.11	2084.08	2071.66	1933.92
		-0.258	2145.24	2482.95	2117.22	2259.27	2206.1	2313.8	2425.73	2559.35	2701.21	2549.31	2257.52	3393.48	2784.52	2903.07	2510.58	2942.85	2426.05	2353.95	2953.95	2960.61	1404.81	1560.98	1628.14	1616.62	1236.24	2891.92	2309.58	2352.85	2144.18
		-0.1935	2382.63	2616.56	2341.21	2382.09	2393.79	2644.48	2724.11	3036.09	3255.6	3016.89	2732.89	3664.92	3437.06	3150.63	2687.34	3431.04	2596.58	2585.07	3282.95	3480.47	1632.37	1749.71	1847.18	1744.14	1447.22	3099.62	2632.19	2657.05	2417.48
		-0.129	2743.47	2882.82	2752.34	2679.89	2843.9	3052.36	2985.42	3644.55	3917.07	3590.06	3349.55	4100.4	4457.82	3547.75	2907.2	3852.61	2841.91	2880.5	3735.49	3856.74	1801.55	1836.84	2050.4	1927.12	1783.94	3419.67	3086.62	3045.33	2788.21
		-0.0645	3152.2	3080.09	3216.62	2956.52	3289.1	3255.67	3129.74	4235.48	4499.67	4064.51	4087.17	4543.25	5285.95	3816.46	3234.04	4041.45	3224.53	3211.7	3914.46	4273.27	1910.49	1953.63	2188.01	2108.93	2056.34	3556.33	3423.34	3421.25	3095.8
		0	3566.32	3090.46	3555.65	3051.68	3630.46	3300.33	3174.17	4560.76	4523.82	4153.98	4398.44	4658.11	5531.1	4031.29	3353.06	4084.32	3594.24	3356.98	3930.83	4388.39	1989.29	1978.26	2204.43	2179.39	2141.27	3755.19	3458.2	3549.54	3369.67
		0.0645	3524.98	2831.84	3506.9	2864.57	3520.98	3078.39	2957.57	4435.73	4041.65	3979	4210.08	4283.65	5117.39	3891.76	3234.27	3929.54	3591.24	3232.96	3789.98	4127.46	1975.15	1847.16	2188.24	2139.18	2116.57	3659.35	3302.52	3450.23	3322.1
		0.129	3155.72	2548.47	3136.11	2594.12	3131.1	2710.76	2583.77	4042.44	3362.08	3493.96	3559.59	3721.23	4289.84	3534.61	2972.5	3674.7	3523.58	2943.33	3532.94	3746.2	1818.48	1742.49	1917.46	1963.26	1888.7	3551.28	3010.34	3206.14	3010.41
		0.1935	2663.74	2276.05	2761.36	2369.77	2716.03	2302.25	2215.26	3556.39	2756.74	3032.05	2927.3	3043.53	3368.6	3130.19	2735.94	3256.43	3256.07	2645.08	3132.75	3232.9	1547.87	1546.69	1707.71	1765.56	1706.04	3416.6	2639.63	2774.98	2673.31
		0.258	2318.42	2244.15	2354.84	2203.17	2394.4	2053.98	1995.64	3016.92	2425.05	2647.4	2431.69	2470.92	2698.73	2881.38	2570.08	2918.87	2796.82	2396.39	2827.38	3004.16	1307.39	1430.18	1517.43	1504.19	1506.67	3272.52	2298.46	2358.49	2294.98
		0.3225	2161.25	2244.42	2256.07	2190.47	2254.73	1854.71	1911.5	2512.8	2248.74	2499.41	2189.12	2195.97	2359.18	2815.03	2408.59	2691.47	2417.16	2353.61	2604.93	2744.13	1163.04	1291.14	1375.68	1325.62	1346.12	3024.28	2051.6	2175.72	2092.16
		0.387	2246.61	2317.38	2312.14	2246.8	2220.41	1800.07	1837.1	2222.93	2163.66	2445.57	2011.44	2075.03	2194.01	2791.04	2328.97	2377.2	2150.67	2255.86	2511.63	2635.72	1087.07	1213.91	1337.54	1181.3	1271.55	2755.52	1878.28	2004.43	1944.42
		0.4515	2508.77	2438.74	2390.97	2399.13	2233.22	1826.64	1783.23	2125.64	2008.76	2594.01	1955.96	2111.36	2085.82	2793.75	2399.96	2342.55	2006.65	2202.41	2456.25	2641.52	1128.56	1145.31	1298.89	1165.02	1343.2	2451.31	1767.93	1924.43	1931.68
		0.516	2907.8	2684.86	2313.75	2625.93	2345.29	2026.86	1736.6	2194.17	2000.31	2845.83	1993.93	2235.49	2248.07	2867.03	2429.26	2236.67	1954.66	2302.98	2382.93	2671.41	1176.91	1098.98	1375.65	1216.23	1409.16	2273.54	1775.76	1861.51	1882.27
		0.5805	3476.26	3031.06	2397.63	2870.96	2397.8	2216.59	1749.43	2319.19	2170.21	3031.29	2144.19	2357.42	2452.68	3059.23	2372.64	2127.53	2049.59	2420.36	2385.56	2609.72	1289.9	1094.5	1435.85	1326.6	1451.55	2151.17	1938.29	1849.66	1935.04
		0.645	4070.64	3366.14	2666.6	3189.59	2574.85	2669.71	1799.39	2465.83	2396.88	3143.04	2349.28	2518.32	2802.08	3301.77	2461.28	2097.88	2153.97	2606.41	2378.77	2669.72	1413.91	1131.04	1491.22	1403.36	1571.34	2116.28	2112.89	1982.38	1989.57
		0.7095	4329.96	3567.14	2884.86	3479.47	2727.2	3111.13	1780.78	2527.92	2574.87	3100.27	2631.93	2714.04	3270.07	3805.38	2501.11	2097.77	2182.89	2743.05	2365.72	2791.67	1494.33	1135.71	1579.11	1514.99	1676.4	2168.13	2413.44	2100.05	2124.06
		0.774	4105.74	3322.62	2991.78	3428.09	2965.63	3422.95	1884.94	2668.23	2290.64	2958.72	3041.26	3098.03	3950.82	4492.58	2675.16	2167.14	2183.53	2684.11	2493.38	3014.54	1667.54	1193.81	1692.54	1621.81	1624.16	2352.28	2867.68	2264.34	2263.05
		0.8385	3509.17	2834	2900.51	3207.31	3142.52	3249.88	2044.47	2905.8	1751.28	2688.75	3207.92	3470.72	4796.33	5234.02	2750.88	2289.87	2229.53	2481.6	2510.24	3216.83	1742.91	1225.98	1676.83	1639.38	1471.17	2709.59	3263.32	2423.03	2428.42
		0.903	2960.37	2212.1	2500.43	2840.31	3318.11	2680.12	2296.78	3042.29	1347.4	2411.17	3121.01	3448.81	5309	5369.48	2729.12	2343.76	2303.7	2181.19	2468.41	3339.31	1656.5	1333.75	1728.45	1592.81	1307.42	3139.76	3457.47	2396.04	2726.6
		0.9675	2600.4	1778.71	2053.83	2387.4	3182.75	1874.56	2253.76	3085.21	1030.85	2170.03	2772.59	2881.29	4959.25	4894.12	2556.45	2426.72	2327.5	1867.79	2309.24	3272.06	1508.78	1432.02	1661.63	1393.42	1061.37	3428.86	3175.97	2524.8	3048.07
		1.032	2400.17	1564.3	1758.7	2022.6	2805.89	1256.35	2029.49	2869.92	887.13	2015.61	2269.32	2086.8	3936.59	4118.62	2385.5	2579.18	2339.77	1689.07	2022.28	2886.46	1367.63	1459.26	1612.77	1162.36	897.38	3459.25	2652.03	2375.99	3216.77
		1.0965	2350.34	1423.42	1599.83	1913.97	2344.85	890.53	1752.68	2519.54	845.59	1753.53	1717.48	1427.94	3090.77	3470.83	2134.04	2685.33	2046.25	1514.87	1758.05	2557.6	1254.45	1389.45	1497.22	1007.59	808.71	3021.65	2153.8	2079.97	3042.67
		1.161	2365.56	1384.16	1475.64	1861.61	1978.54	744.06	1365.52	2190.77	760.23	1584.13	1374.03	1023.75	2651.87	3135.77	1920.34	2751.36	1739.65	1464.18	1559.34	2333.56	1175.28	1166.04	1285.26	860.45	759.52	2419.24	1873.29	1692.44	2581.16
		1.2255	2395.47	1455	1423.54	1762.6	1676.77	687.92	1181.19	2034.44	727.71	1367.34	1225.37	927.23	2476.6	3067.54	1721.76	2786.08	1474.51	1356.31	1386.66	2130.18	1185.12	936.43	1122.57	767.04	709.91	1934.29	1790.24	1454.53	1888.78
		1.29	2527.16	1460	1363.54	1634.97	1495.57	626.95	1021.87	2046.05	680.54	1248.86	1170.8	938.9	2558.87	3090.62	1665.73	2723.27	1207.08	1366.38	1346.66	2021.68	1141.25	724.06	1030.38	728.45	716.19	1541.77	1745.25	1368.88	1452.53
		1.3545	2620.71	1567.91	1304.38	1516.91	1407.51	625.5	957.79	1986.79	651.74	1143.77	1145.4	1009.69	2555.22	3115.75	1542.55	2415.74	1116.4	1336.39	1320.13	1942.08	1061.53	611.74	957.49	738.64	706.53	1319.75	1675.04	1300.7	1243.64
		1.419	2592.5	1704.23	1286.78	1321.35	1392.14	607.19	921.22	1889.74	611.23	1046.51	1163.39	1059.6	2618.57	3072.54	1558.2	1995.07	1059.66	1316.05	1258.14	1902.49	990.08	595.05	930.85	727.24	704.02	1171.58	1665.37	1279.29	1169.64
		1.4835	2416.67	1809.33	1307.28	1155.06	1419.56	582.51	952.69	1783.4	576.32	954.22	1092.28	1152.79	2702.24	2867.69	1466.21	1623.4	1003.02	1291.49	1252.32	1782.94	943.22	607.44	894.1	717.3	709.18	1090.72	1579.48	1384.39	1065.8
		1.548	2241.7		1225.51					1695.13		882.32	1083.08			2619.67	1471.4	1275.87	986.6	1266.77			885.16	572.11	934.31	681.86	707.67	1040.78	1579.67	1502.58	1042.57
		1.6125																	991.04									998.56
RAW int Intensity channel 3 - Noise
		image name:	N2_dm1_bub1_cls2_NM_20220525_02						N2_dm1_bub1_cls2_NM_20220525_05					N2_dm1_bub1_cls2_NM_20220525_07			N2_dm1_bub1_cls2_NM_20220525_09						N2_dm1_bub1_cls2_NM_20220525_11					N2_dm1_bub1_cls2_NM_20220525_15
		MEASURED SAMPLE # (measurable chromosome)	1	2	3	4	5	6	1	2	3	4	5	1	2	3	1	2	3	4	5	6	1	2	3	4	5	1	2	3	4
		Line Scan coordinates (ROI)	0096-0594-0318	0080-0589-0330	0084-0586-0325	00103-0609-0336	0104-0598-0328	0080-0614-0332	0128-0568-0570	0112-0574-0571	0100-0574-0564	0137-0572-0564	0092-0569-0562	0072-0592-0548	0080-0586-0552	0084-0591-0548	0080-0622-0436	0080-0622-0436	0104-0629-0437	0104-0629-0437	0124-0640-0436	0124-0640-0436	0164-0607-0266	0181-0618-0272	0181-0618-0272	0208-0618-0261	0216-0623-0258	0088-0512-0491	0100-0520-0491	0116-0520-0481	0116-0520-0481
	Relative Distance between measure points (µm)	-1.548		472.084		439.634		439.725	459.58		445.052				512.281						513.672	513.672
		-1.4835		484.618	426.363	432.531	476.205	424.38	447.06	424.511	427.265	466.449	470.78	580.233	514.134	541.426	535.859	535.859		519.954	515.255	515.255		372.324	372.324	378.824	379.866		439.691	444.337	444.337
		-1.419	471.009	485.089	447.712	423.273	476.145	442.316	437.428	438.62	432.634	478.75	452.291	606.943	504.604	536.011	529.008	529.008	519.954	536.5	509.253	509.253	378.283	381.201	381.201	378.759	375.105		445.863	412.359	412.359
		-1.3545	465.218	496.854	473.854	456.966	466.131	463.809	453.848	428.198	458.046	463.704	458.223	613.741	502.826	540.375	543.963	543.963	536.5	524.622	511.333	511.333	367.23	376.719	376.719	370.349	363.175	437.083	442.264	408.389	408.389
		-1.29	475.024	470.52	467.516	457.233	459.711	459.382	462.95	426.509	460.436	467.783	448.211	622.498	499.211	577.929	549.085	549.085	524.622	541.341	498.743	498.743	370.169	375.435	375.435	367.121	360.816	425.498	429.139	409.486	409.486
		-1.2255	458.423	444.318	477.618	445.945	475.272	469.266	444.098	426.34	451	501.941	438.146	598.455	517.02	579.914	564.911	564.911	541.341	533.503	499.049	499.049	387.481	367.585	367.585	376.206	367.553	433.559	420.294	422.451	422.451
		-1.161	480.714	440.432	456.078	456.245	480.651	487.834	461.813	436.245	456.669	503.832	430.748	589.679	529.75	593.506	557.292	557.292	533.503	518.792	518.807	518.807	383.793	366.995	366.995	382.897	365.328	438.811	421.462	438.367	438.367
		-1.0965	478.229	455.889	446.112	480.418	477.899	454.472	467.579	420.595	488.933	492.937	439.696	555.947	561.425	583.399	542.838	542.838	518.792	525.695	522.306	522.306	360.373	368.931	368.931	374.021	367.169	428.091	423.168	443.522	443.522
		-1.032	496.046	462.261	440.141	447.371	491.95	440.761	469.771	425.372	483.172	512.345	449.1	559.656	600.099	574.184	557.726	557.726	525.695	511.309	511.403	511.403	376.486	361.292	361.292	369.751	357.31	414.397	418.625	438.049	438.049
		-0.9675	508.701	478.445	456.951	450.207	481.874	445.554	469.991	409.991	485.5	505.582	474.642	546.523	603.698	571.46	576.072	576.072	511.309	525.827	522.643	522.643	385.55	379.805	379.805	371.554	366.899	416.822	417.613	421.678	421.678
		-0.903	479.822	475.02	481.767	461.79	472.876	427.034	470.408	431.856	517.597	499.087	488.575	557.659	596.937	561.127	567.923	567.923	525.827	531.639	505.437	505.437	365.441	368.356	368.356	379.714	372.71	406.029	405.917	441.981	441.981
		-0.8385	459.76	483.652	504.919	480.431	494.394	420.073	489.128	433.396	512.304	481.419	494.361	533.547	591.652	602.334	556.931	556.931	531.639	515.399	513.067	513.067	368.979	370.239	370.239	371.586	378.5	433.37	409.708	449.411	449.411
		-0.774	477.148	459.004	502.194	486.567	487.169	416.978	492.37	426.343	484.849	477.007	485.053	557.205	590.929	614.551	554.511	554.511	515.399	506.062	510.237	510.237	371.452	377.405	377.405	370.143	366.696	419.294	427.902	436.66	436.66
		-0.7095	459.577	449.672	491.253	459.726	490.182	410.789	467.462	421.351	482.616	452.819	497.79	551.602	589.716	603.732	552.854	552.854	506.062	528.827	499.993	499.993	367.166	383.171	383.171	377.497	346.686	414.383	413.149	418.342	418.342
		-0.645	459.638	436.125	502.239	441.465	489.457	409.051	467.598	415.346	471.978	469.405	479.732	546.343	572.431	591.418	559.949	559.949	528.827	518.178	520.837	520.837	377.969	375.395	375.395	371.778	369.341	413.514	421.467	413.586	413.586
		-0.5805	459.515	449.02	475.895	454.162	469.239	418.691	478.827	433.661	461.875	469.889	505.657	571.094	586.903	599.372	568.916	568.916	518.178	530.608	552.204	552.204	376.513	381.639	381.639	363.914	367.665	425.303	412.285	418.784	418.784
		-0.516	498.617	469.254	466.925	443.688	474.333	420.901	471.146	420.946	442.348	459.744	502.594	618.128	599.824	574.024	573.338	573.338	530.608	558.564	524.207	524.207	370.325	380.32	380.32	357.513	381.062	425.695	414.478	422.802	422.802
		-0.4515	476.676	454.639	474.805	415.938	485.083	425.89	462.187	436.823	461.985	453.937	489.326	619.751	606.951	562.107	569.668	569.668	558.564	545.765	512.703	512.703	359.702	376.792	376.792	350.872	377.751	450.661	420.11	428.652	428.652
		-0.387	461.049	451.936	468.683	430.593	481.719	408.493	443.839	421.026	470.78	497.567	480.121	626.421	594.022	548.362	563.531	563.531	545.765	548.091	536.23	536.23	381.996	380.697	380.697	356.535	380.69	433.501	429.558	424.618	424.618
		-0.3225	468.796	449.055	456.09	456.536	465.325	411.115	455.546	431.064	452.961	476.666	466.656	602.4	560.084	577.658	555.477	555.477	548.091	537.376	535.66	535.66	387.488	377.61	377.61	369.755	374.762	407.656	426.596	408.041	408.041
		-0.258	506.097	454.328	477.835	441.06	476.511	441.801	441.039	438.913	456.197	473.472	456.354	608.079	552.853	590.703	563.296	563.296	537.376	539.694	521.834	521.834	386.938	379.788	379.788	378.006	369.852	397.227	426.173	414.154	414.154
		-0.1935	546.253	459.889	477.638	418.866	479.626	435.714	450.697	428.62	457.585	455.553	465.234	573.983	539.554	602.442	556.238	556.238	539.694	546.732	515.088	515.088	406.774	364.709	364.709	383.674	357.213	414.921	435.393	396.034	396.034
		-0.129	577.336	461.452	480.336	408.896	479.067	426.04	462.469	450.29	440.849	462.296	470.193	597.62	538.323	612.908	573.743	573.743	546.732	520.749	530.085	530.085	411.57	372.502	372.502	384.373	365.136	410.671	434.676	410.51	410.51
		-0.0645	588.293	465.637	465.098	425.382	474.193	426.343	449.767	441.561	435.925	494.237	448.74	576.933	542.357	601.589	564.573	564.573	520.749	533.013	543.801	543.801	405.588	379.867	379.867	368.651	370.252	406.868	442.819	411.73	411.73
		0	569.9	476.779	473.273	415.246	490.539	423.646	427.935	446.121	444.723	475.971	459.417	568.54	573.511	589.655	546.053	546.053	533.013	519.543	538.168	538.168	395.78	383.772	383.772	375.994	382.079	396.273	418.299	419.913	419.913
		0.0645	552.851	461.951	472.142	435.181	509.194	448.574	441.12	437.157	448.47	496.441	455.102	574.302	597.08	569.627	547.627	547.627	519.543	516.967	545.9	545.9	378.479	384.238	384.238	389.525	376.434	395.756	418.591	411.616	411.616
		0.129	553.632	480.089	492.416	431.603	500.67	440.88	451.639	454.46	446.763	489.978	448.488	594.033	613.111	561.231	531.955	531.955	516.967	533.625	529.329	529.329	374.074	394.284	394.284	380.948	364.055	398.635	413.894	402.421	402.421
		0.1935	549.553	485.37	500.961	433.645	489.372	434.901	466.225	445.876	442.247	476.674	470.728	580.678	610.256	563.672	545.42	545.42	533.625	522.211	538.97	538.97	368.18	386.849	386.849	375.867	364.099	407.144	417.795	414.473	414.473
		0.258	568.929	460.281	495.77	441.654	488.948	436.524	448.743	439.805	447.443	471.48	480.843	599.54	609.965	566.567	548.002	548.002	522.211	520.504	522.638	522.638	382.269	395.362	395.362	381.06	375.275	433.384	407.935	400.22	400.22
		0.3225	588.046	470.767	499.201	418.231	495.897	440.577	450.319	439.212	446.879	482.155	482.509	548.265	586.425	539.829	535.413	535.413	520.504	530.069	534.643	534.643	379.293	378.285	378.285	366.157	372.894	411.844	416.738	410.941	410.941
		0.387	590.439	467.598	507.631	435.547	477.668	433.901	447.804	430.903	470.013	479.181	464.738	549.765	584.122	573.833	552.032	552.032	530.069	494.552	525.597	525.597	376.168	374.616	374.616	368.11	356.606	396.82	399.351	415.547	415.547
		0.4515	594.852	499.685	493.162	445.137	480.981	432.702	453.18	439.831	446.931	470.228	493.715	560.608	559.825	594.441	568.231	568.231	494.552	529.045	523.37	523.37	395.357	383.781	383.781	378.698	381.554	414.907	406.18	409.792	409.792
		0.516	570.517	491.143	489.134	448.666	477.493	456.125	443.961	430.908	424.846	466.206	484.243	556.352	544.776	557.918	555.986	555.986	529.045	530.662	538.012	538.012	382.657	379.192	379.192	364.379	376.72	421.346	412.411	428.587	428.587
		0.5805	552.738	473.907	502.658	454.776	476.571	467.294	434.398	428.877	431.556	470.923	481.456	590.23	535.127	559.203	544.686	544.686	530.662	533.85	540.848	540.848	379.113	385.531	385.531	360.059	365.597	420.547	399.843	431.579	431.579
		0.645	578.987	466.24	489.116	441.642	460.162	465.285	411.864	432.97	423.009	471.279	491.635	607.663	545.661	571.985	540.652	540.652	533.85	540.559	522.761	522.761	388.661	388.028	388.028	382.521	386.143	430.005	404.066	428.452	428.452
		0.7095	565.799	479.236	503.135	432.101	483.055	464.845	414.909	417.396	417.934	472.321	475.117	614.313	558.015	591.199	549.899	549.899	540.559	532.564	529.047	529.047	379.039	374.777	374.777	384.594	379.161	425.467	406.523	424.33	424.33
		0.774	560.262	472.426	465.098	439.376	476.389	464.792	426.538	409.919	438.492	473.127	454.613	639.189	539.947	621.665	569.974	569.974	532.564	541.154	537.331	537.331	387.538	378.167	378.167	382.473	378.675	447.382	418.36	415.419	415.419
		0.8385	585.875	462.237	467.798	457.361	459.052	473.99	437.402	408.828	428.069	465.045	460.67	647.862	545.665	634.777	551.796	551.796	541.154	553.586	551.286	551.286	382.915	376.509	376.509	358.978	374.047	444.484	409.835	408.538	408.538
		0.903	581.596	473.73	470.358	438.425	470.829	471.239	436.862	415.662	429.071	473.023	452.826	624.708	576.578	627.931	548.831	548.831	553.586	535.871	545.393	545.393	383.504	378.805	378.805	366.817	375.099	420.132	415.412	417.725	417.725
		0.9675	562.883	457.953	464.545	451.05	461.94	463.829	425.871	418.958	409.476	431.594	451.591	610.242	580.179	631.491	559.568	559.568	535.871	534.344	529.892	529.892	383.278	381.016	381.016	371.352	372.876	420.962	416.804	415.659	415.659
		1.032	543.934	465.176	469.421	431.394	457.999	459.806	412.145	436.916	442.746	438.255	464.874	602.209	603.031	612.377	551.889	551.889	534.344	542.062	528.551	528.551	387.553	387.482	387.482	362.847	375.81	435.094	396.43	422.24	422.24
		1.0965	568.163	480.425	472.089	428.287	455.391	463.669	426.076	455.248	463.33	458.397	467.32	625.518	602.004	597.031	567.407	567.407	542.062	542.197	502.426	502.426	384.055	389.412	389.412	365.159	368.635	451.185	415.098	424	424
		1.161	544.376	474.576	479.565	444.11	500.073	497.76	402.403	432.269	460.18	462.498	463.26	626.718	609.34	581.451	581.09	581.09	542.197	532.669	521.453	521.453	383.666	395.367	395.367	369.969	361.012	482.884	419.324	447.087	447.087
		1.2255	560.859	467.228	510.036	416.363	506.493	521.22	405.668	416.708	475.389	483.02	474.396	636.529	629.682	599.627	593.851	593.851	532.669	536.872	518.282	518.282	386.776	390.145	390.145	368.742	363.667	490.432	397.824	453.442	453.442
		1.29	564.165	457.755	515.032	411.106	480.046	522.852	411.468	412.967	454.96	450.428	465.315	670.45	584.568	615.507	561.685	561.685	536.872	543.92	513.031	513.031	378.311	378.99	378.99	375.066	362.12	475.62	396.442	453.773	453.773
		1.3545	568.067	457.476	516.582	428.388	476.592	533.396	413.861	428.52	455.526	448.352	485.747	694.191	582.722	600.837	542.964	542.964	543.92	563.826	524.449	524.449	391.8	378.016	378.016	376.62	364.816	470.326	395.357	460.158	460.158
		1.419	552.086	466.432	521.555	411.82	472.176	484.86	425.065	429.353	443.744	445.115	469.057	665.309	595.136	580.771	549.398	549.398	563.826	574.072	504.881	504.881	396.657	373.46	373.46	378.59	374.509	457.924	420.095	454.013	454.013
		1.4835	560.024	472.176	492.531	424.085	476.278	505.921	431.931	417.787	443.409	462.632	468.423	640.445	578.523	573.302	549.69	549.69	574.072	556.13	509.471	509.471	396.664	387.307	387.307	385.704	382.283	447.119	423.638	427.375	427.375
		1.548	553.361		497.701					413.231		449.783	470.955			626.282	560.632	560.632	556.13	561.635			404.369	367.646	367.646	390.951	378.695	446.632	398.317	436.633	436.633
		1.6125																	561.635									436.894
Average Noise Intensity of channel 3			529.656	467.288	480.811	440.211	479.337	450.729	446.333	429.322	453.62	472.511	469.36	596.64	569.851	585.057	556.092	556.092	533.765	533.765	523.325	523.325	382.413	378.955	378.955	373.222	370.717	428.352	417.144	424.331	424.331
Corrected signal Intensity channel 3 Signal/Average noise
		image name:	N2_dm1_bub1_cls2_NM_20220525_02						N2_dm1_bub1_cls2_NM_20220525_05					N2_dm1_bub1_cls2_NM_20220525_07			N2_dm1_bub1_cls2_NM_20220525_09						N2_dm1_bub1_cls2_NM_20220525_11					N2_dm1_bub1_cls2_NM_20220525_15					Average intensity/noise
		MEASURED SAMPLE # (measurable chromosome)	1	2	3	4	5	6	1	2	3	4	5	1	2	3	1	2	3	4	5	6	1	2	3	4	5	1	2	3	4
	Distance relative to ring Max int (µm)	-1.548	0	2.23391	0	3.16544	0	3.85238	2.42624	0	4.17658	0	0	0	1.23317	0	0	0	0	0	2.20422	2.01659	0	0	0	0	0	0	0	0	0		0.734776
		-1.4835	0	2.4817	1.6974	3.59398	2.11275	3.87807	2.58679	2.99155	4.00004	2.25707	2.28748	2.69427	1.26259	1.30269	3.27633	2.68367	0	2.65414	2.24633	2.06298	0	2.47747	1.89965	2.5831	1.87194	0	1.9873	3.34817	4.31713		2.22602
		-1.419	2.2184	2.78631	1.81965	3.94665	2.24517	4.01771	2.7548	3.26801	3.51415	2.38553	2.46003	3.11712	1.34018	1.25629	3.21044	2.76566	3.1509	2.87568	2.43128	2.19074	1.41653	2.48555	1.91419	2.58637	1.87264	0	2.09239	3.36379	4.25173		2.54269
		-1.3545	1.94998	3.05002	1.79992	3.86699	2.45103	4.02284	2.8435	3.73344	3.05024	2.4883	2.94254	3.49168	1.45531	1.35163	3.21038	2.94172	3.37907	2.88338	2.58224	2.37839	1.4579	2.71539	2.01811	2.77164	2.07781	3.71297	2.16647	3.54092	4.2457		2.7786
		-1.29	1.69848	3.44423	1.6384	3.66138	2.7494	4.29136	3.04631	4.26566	2.65376	2.58443	3.38715	3.79163	1.80854	1.41166	3.30997	3.33495	3.90175	3.03023	2.81351	2.67958	1.62764	2.9678	2.10685	2.79359	2.09292	3.86717	2.26483	3.92017	4.25289		2.9447
		-1.2255	1.6469	3.56399	1.57457	3.38658	3.13698	4.70733	3.29763	4.96972	2.42846	2.82618	3.72339	4.06751	2.47677	1.5628	3.50805	3.7413	4.42653	3.42212	3.14717	3.09466	1.80705	3.47118	2.2604	2.91772	2.08008	4.18494	2.42919	4.6522	4.16593		3.19577
		-1.161	1.53371	3.61477	1.55059	3.27786	3.67833	5.22103	3.72726	5.51786	2.40203	3.06903	4.23443	4.75809	3.60454	1.70505	3.76864	4.07625	4.85069	3.79691	3.59874	3.66251	2.01842	4.07339	2.33492	3.00472	2.12394	4.47246	2.8284	5.40027	4.3378		3.52561
		-1.0965	1.51077	3.73506	1.67313	3.35262	4.40373	5.93847	4.42315	5.91134	2.81436	3.49323	4.75486	5.85882	5.11336	2.04495	3.94634	4.32889	5.39007	4.35152	4.11869	4.26005	2.26164	4.57189	2.52511	3.30245	2.15731	4.97266	3.642	6.55687	4.93061		4.01186
		-1.032	1.67331	4.01084	1.94833	3.70806	4.63109	6.75581	5.15635	6.0368	3.42796	4.30276	5.21178	7.19898	6.31527	2.81991	4.41204	4.45541	5.80853	4.89431	4.41336	4.57328	2.61586	5.03425	2.97107	3.74908	2.25496	5.43448	4.59292	7.41172	5.7807		4.5379
		-0.9675	1.79099	4.59451	2.53736	4.73703	4.6729	7.07065	5.90129	6.02513	4.49167	4.98031	5.55823	8.29344	6.83172	4.09244	4.68642	4.3243	5.95764	5.26996	4.90602	4.81372	2.87788	4.91917	3.4473	4.37077	2.52643	6.15606	5.42626	7.52571	6.30473		5.0031
		-0.903	2.25061	5.67402	3.73151	5.95324	4.40934	6.48853	6.0372	5.53608	5.90373	5.84827	5.60971	8.55757	6.36949	5.43744	4.90958	4.16301	5.98409	5.65738	5.06552	4.8691	3.05376	4.4751	3.90831	4.75864	2.9546	6.62397	5.81713	7.19474	6.56071		5.30353
		-0.8385	3.16638	6.35452	5.17627	7.06037	4.18134	5.43348	5.8675	5.07349	6.8096	6.16796	5.3266	7.68486	5.43825	6.04531	5.03321	3.98695	5.77557	5.90093	5.01905	4.77392	3.1098	4.19309	4.25194	4.79299	3.21561	7.08872	5.61876	6.62071	6.56773		5.37017
		-0.774	4.39196	6.29368	6.18883	7.83177	3.96636	4.75248	5.21503	4.5454	6.84848	5.77496	4.99018	6.89628	4.57636	5.98066	5.05037	3.8442	5.46858	5.72583	4.81927	4.86031	3.28312	3.7637	4.4755	4.5953	3.8029	7.18143	5.137	6.2591	6.2809		5.26896
		-0.7095	5.49047	5.64887	6.37159	7.46876	3.87371	4.34476	4.78764	4.34201	6.15901	5.07605	4.78352	6.42955	4.25861	5.50676	4.80258	3.78831	5.21821	5.3393	4.62793	4.72053	3.34756	3.52309	4.30102	4.23059	4.19498	6.85922	4.53949	5.78113	5.82805		5.02218
		-0.645	6.02553	4.92964	5.90203	6.70199	3.84277	4.15655	4.53632	4.15993	5.31872	4.44472	4.74071	6.33138	4.2894	4.98915	4.75252	3.71417	4.85942	4.93781	4.55738	4.69693	3.30893	3.53808	4.18734	3.95957	4.44617	6.68308	4.21778	5.41665	5.46786		4.79698
		-0.5805	5.73801	4.74209	5.14308	5.85551	3.78208	4.37189	4.2859	4.02938	4.70784	4.0736	4.59974	6.27896	4.36397	4.6597	4.52783	3.70951	4.63706	4.6658	4.57099	4.59447	3.2206	3.48968	4.06872	3.65886	4.41251	6.37419	4.12968	5.29097	5.06058		4.5877
		-0.516	5.07052	4.81651	4.65692	5.25714	3.81481	4.33225	4.27956	4.04391	4.62387	3.90154	4.42976	6.21854	4.42612	4.43598	4.36449	3.71989	4.47451	4.43472	4.56308	4.64503	3.03938	3.39009	3.7752	3.48085	3.89362	6.19995	4.38976	5.22182	4.64682		4.43264
		-0.4515	4.45878	5.16469	4.53161	5.01632	3.83077	4.45048	4.46991	4.14179	4.65328	4.2072	4.2849	6.00613	4.40956	4.28466	4.37364	3.94648	4.48446	4.25073	4.72489	4.78991	2.96933	3.43711	3.73005	3.57136	3.4767	6.26683	4.52419	4.89559	4.48447		4.40813
		-0.387	4.03881	5.03167	4.39695	4.85072	4.03145	4.62557	4.6321	4.20677	4.89566	4.4192	4.22041	5.68078	4.22569	4.38009	4.2434	4.2314	4.39193	4.16052	4.93636	4.97399	3.01441	3.66395	3.60151	3.84693	3.28947	6.44241	4.75256	4.80743	4.44985		4.42903
		-0.3225	3.81516	5.18395	4.25464	4.93614	4.32479	4.75776	4.9682	4.92949	5.32155	4.89953	4.3221	5.52145	4.25296	4.49231	4.31694	4.70972	4.35875	4.21251	5.16261	5.14675	3.16843	3.85756	3.78214	3.91437	3.12131	6.47624	4.99607	4.88218	4.55758		4.5739
		-0.258	4.05025	5.31353	4.40343	5.13225	4.6024	5.13346	5.4348	5.96138	5.95479	5.39524	4.80979	5.68765	4.8864	4.96203	4.51468	5.29202	4.54516	4.41009	5.64459	5.65731	3.67354	4.11918	4.2964	4.33152	3.33473	6.75127	5.53665	5.54485	5.05309		4.98043
		-0.1935	4.49845	5.59946	4.86929	5.41125	4.99396	5.86712	6.10331	7.07183	7.17693	6.3848	5.82259	6.14259	6.03151	5.38517	4.83254	6.16991	4.86465	4.84308	6.27326	6.65069	4.2686	4.6172	4.87441	4.67319	3.90384	7.23615	6.31003	6.26174	5.69716		5.61499
		-0.129	5.17972	6.16926	5.72437	6.08774	5.93299	6.77205	6.68877	8.48908	8.63513	7.59784	7.13643	6.87248	7.82279	6.06394	5.22791	6.928	5.32427	5.39657	7.138	7.36969	4.711	4.84713	5.41068	5.16346	4.81214	7.98331	7.39941	7.17678	6.57084		6.43558
		-0.0645	5.95141	6.59142	6.68999	6.71615	6.86178	7.22312	7.01212	9.86551	9.91947	8.60194	8.70797	7.61472	9.27603	6.52323	5.81565	7.26759	6.0411	6.01707	7.47999	8.16562	4.99588	5.15532	5.77381	5.6506	5.54693	8.30235	8.20661	8.0627	7.29572		7.14937
		0	6.73328	6.61361	7.39511	6.93232	7.57393	7.3222	7.11166	10.6232	9.97271	8.79129	9.37115	7.80723	9.70623	6.89042	6.02968	7.34468	6.73375	6.28924	7.51127	8.3856	5.20194	5.22031	5.81714	5.83939	5.77603	8.7666	8.29018	8.36503	7.94114		7.46056
		0.0645	6.65522	6.06016	7.29372	6.50727	7.34553	6.8298	6.62637	10.3319	8.90977	8.42097	8.96984	7.17962	8.98023	6.65193	5.81607	7.06634	6.72813	6.0569	7.24212	7.887	5.16496	4.87436	5.77441	5.73165	5.7094	8.54285	7.91698	8.13099	7.82903		7.14599
		0.129	5.95806	5.45374	6.52254	5.8929	6.53215	6.01417	5.78888	9.41587	7.41167	7.39445	7.58393	6.23697	7.52801	6.04148	5.34533	6.60807	6.60137	5.51428	6.75095	7.15846	4.75528	4.59815	5.05987	5.2603	5.09473	8.29056	7.21655	7.55576	7.09449		6.43721
		0.1935	5.02919	4.87076	5.74313	5.38326	5.66623	5.10783	4.96324	8.28374	6.0772	6.41689	6.2368	5.10111	5.91137	5.35023	4.91994	5.85592	6.10019	4.95551	5.98625	6.17762	4.04764	4.08147	4.50637	4.73058	4.60201	7.97615	6.32786	6.53966	6.30006		5.62925
		0.258	4.37722	4.8025	4.89764	5.00481	4.99524	4.55702	4.47119	7.02717	5.34599	5.60283	5.18087	4.14139	4.73585	4.92496	4.62168	5.24889	5.23979	4.4896	5.40273	5.74053	3.41879	3.77402	4.00425	4.03028	4.06421	7.63979	5.50999	5.55814	5.40847		4.97296
		0.3225	4.08048	4.80308	4.69222	4.97596	4.70386	4.11491	4.28268	5.85295	4.95732	5.28963	4.66406	3.68056	4.14	4.81155	4.33128	4.83997	4.52851	4.40945	4.97766	5.24365	3.04132	3.40711	3.6302	3.55182	3.63113	7.06027	4.91821	5.12742	4.93049		4.57509
		0.387	4.24164	4.95921	4.80883	5.10392	4.63226	3.99368	4.11598	5.17777	4.76976	5.17569	4.2855	3.47786	3.85015	4.77054	4.1881	4.27483	4.02924	4.22632	4.79937	5.03649	2.84266	3.20331	3.52955	3.16514	3.42998	6.43284	4.50271	4.72374	4.58232		4.35619
		0.4515	4.7366	5.21892	4.97279	5.44996	4.65898	4.05263	3.99529	4.95116	4.42829	5.48984	4.16729	3.53875	3.66029	4.77518	4.31576	4.21252	3.75942	4.12618	4.69355	5.04758	2.95115	3.02229	3.42756	3.12152	3.62325	5.72265	4.23818	4.53521	4.5523		4.32569
		0.516	5.48998	5.74562	4.81218	5.96516	4.89278	4.49685	3.89082	5.11078	4.40966	6.02278	4.24819	3.7468	3.94502	4.90043	4.36845	4.02212	3.66202	4.31459	4.55345	5.10469	3.07759	2.90003	3.63012	3.25873	3.80118	5.30764	4.25695	4.38693	4.43586		4.43991
		0.5805	6.56324	6.48649	4.98664	6.52178	5.00233	4.91779	3.91956	5.40198	4.7842	6.41528	4.56833	3.95116	4.30407	5.22894	4.26663	3.82586	3.83987	4.5345	4.55847	4.98681	3.37305	2.88821	3.78898	3.55445	3.91552	5.02197	4.64657	4.35901	4.56022		4.6611
		0.645	7.68544	7.20356	5.54605	7.2456	5.3717	5.92309	4.0315	5.74354	5.28389	6.65178	5.00529	4.22083	4.91722	5.6435	4.42603	3.77254	4.03543	4.88306	4.5455	5.10146	3.69734	2.98463	3.93509	3.76012	4.23866	4.94051	5.06513	4.67178	4.68872		5.00755
		0.7095	8.17504	7.63371	5.99999	7.9041	5.68953	6.90244	3.9898	5.88817	5.67627	6.56127	5.60749	4.54887	5.73847	6.50429	4.49765	3.77234	4.08961	5.13906	4.52056	5.33449	3.90763	2.99696	4.16702	4.05922	4.52205	5.06156	5.78563	4.94909	5.00567		5.332
		0.774	7.75171	7.11043	6.22236	7.78738	6.18695	7.59425	4.22317	6.21499	5.04969	6.2617	6.47959	5.19246	6.93308	7.67887	4.81064	3.89709	4.09081	5.02863	4.7645	5.76036	4.36057	3.15027	4.46634	4.34543	4.38114	5.49146	6.87456	5.33626	5.33322		5.61303
		0.8385	6.62537	6.06478	6.03254	7.28585	6.55598	7.21027	4.58059	6.76835	3.86068	5.69034	6.83467	5.81711	8.41682	8.94617	4.9468	4.11779	4.17699	4.64924	4.79672	6.14691	4.55766	3.23516	4.42488	4.3925	3.96845	6.32561	7.82301	5.71024	5.72294		5.71326
		0.903	5.58923	4.73391	5.20044	6.45216	6.9223	5.94619	5.14589	7.08627	2.97033	5.10289	6.64951	5.78038	9.31648	9.1777	4.90767	4.2147	4.31594	4.08642	4.71679	6.38095	4.3317	3.51955	4.5611	4.26772	3.52674	7.32986	8.28843	5.64663	6.42565		5.60667
		0.9675	4.9096	3.80645	4.27159	5.42331	6.63991	4.15895	5.0495	7.18624	2.2725	4.59255	5.90718	4.82919	8.70272	8.3652	4.59717	4.36388	4.36053	3.49927	4.41263	6.25245	3.94542	3.77887	4.38477	3.73348	2.86302	8.00477	7.61361	5.95008	7.18324		5.2089
		1.032	4.53156	3.34761	3.65778	4.59462	5.85369	2.78737	4.54703	6.68477	1.95567	4.26574	4.83493	3.49758	6.90811	7.03969	4.28975	4.63804	4.38352	3.16444	3.86429	5.51562	3.57631	3.85075	4.25584	3.11439	2.42066	8.07572	6.35759	5.59938	7.58081		4.66184
		1.0965	4.43748	3.04613	3.32736	4.34785	4.89187	1.97575	3.92684	5.86865	1.86409	3.71109	3.6592	2.3933	5.42382	5.93246	3.83756	4.82893	3.83361	2.83808	3.35939	4.88722	3.28035	3.66654	3.95092	2.6997	2.18148	7.05413	5.16321	4.90177	7.17052		4.0848
		1.161	4.46622	2.96211	3.06906	4.22891	4.12766	1.65079	3.05942	5.10286	1.67592	3.35258	2.92746	1.71586	4.65362	5.35977	3.45328	4.94767	3.2592	2.74312	2.97968	4.45911	3.07332	3.07699	3.39159	2.30546	2.04879	5.64778	4.49075	3.98849	6.0829		3.59656
		1.2255	4.52269	3.11371	2.96071	4.00399	3.49811	1.52624	2.64643	4.73873	1.60423	2.89377	2.61073	1.55409	4.34605	5.24315	3.09618	5.0101	2.76247	2.54102	2.64971	4.07048	3.09906	2.47109	2.96228	2.05518	1.91497	4.51565	4.29166	3.42782	4.4512		3.26143
		1.29	4.77132	3.12441	2.83592	3.71406	3.12008	1.39097	2.28948	4.76577	1.50024	2.64303	2.49446	1.57364	4.49042	5.2826	2.99542	4.89715	2.26144	2.55989	2.57328	3.86315	2.98434	1.91068	2.71901	1.95179	1.93191	3.5993	4.18381	3.22597	3.42311		3.07161
		1.3545	4.94795	3.35534	2.71287	3.44587	2.93637	1.38775	2.14591	4.62774	1.43675	2.42062	2.44035	1.69229	4.48402	5.32555	2.77391	4.34413	2.09156	2.5037	2.52258	3.71104	2.77587	1.61428	2.52666	1.97909	1.90585	3.08099	4.0155	3.0653	2.93083		2.93795
		1.419	4.89469	3.64706	2.67627	3.00163	2.90431	1.34713	2.06397	4.40168	1.34745	2.21478	2.47868	1.77594	4.59519	5.25169	2.80205	3.58766	1.98526	2.4656	2.40413	3.63539	2.58903	1.57024	2.45636	1.94854	1.89908	2.73509	3.99231	3.01484	2.75643		2.84284
		1.4835	4.56272	3.87198	2.71891	2.62388	2.96151	1.29237	2.13448	4.15399	1.27049	2.01947	2.32717	1.93214	4.74201	4.90156	2.63663	2.9193	1.87914	2.41958	2.39301	3.40695	2.46649	1.60294	2.35939	1.92191	1.913	2.54632	3.78641	3.26253	2.51172		2.74269
		1.548	4.23237	0	2.54884	0	0	0	0	3.94839	0	1.8673	2.30757	0	0	4.47763	2.64596	2.29435	1.84838	2.37327	0	0	2.31467	1.50971	2.46549	1.82695	1.90892	2.42973	3.78687	3.54106	2.45698		1.75119
		1.6125	0	0	0	0	0	0	0	0	0	0	0	0	0	0	0	0	1.8567	0	0	0	0	0	0	0	0	2.33117	0	0	0		0.144409
VC2773 (bub-3∆)
RAW int INTENSITY channel 3 - BUB-1 signal
		image name:	VC2773_dm1_bub1_cls2_NM_20220525_22			VC2773_dm1_bub1_cls2_NM_20220525_31					VC2773_dm1_bub1_cls2_NM_20220525_33		VC2773_dm1_bub1_cls2_NM_20220602_19					VC2773_dm1_bub1_cls2_NM_20220602_23		VC2773_dm1_bub1_cls2_NM_20220602_24						VC2773_dm1_bub1_cls2_NM_20220602_27
		MEASURED SAMPLE # (measurable chromosome)	1	2	3	1	2	3	4	5	1	2	1	2	3	4	5	1	2	1	2	3	4	5	6	1	2	3	4	5	6
		Line Scan coordinates (ROI)	0047-0755-0394	0071-0764-0414	0089-0757-0400	0067-0486-0419	0093-0461-0423	0096-0482-0427	0105-0501-0425	0120-0484-0427	0093-0608-0532	0120-0616-0521	0053-0563-0555	0069-0558-0565	0098-0301	0085-0526-0560	0100-0557-0571	0087-0616-0517	0093-0598-0520	0045-0499-0539	0068-0475-0528	0065-0485-0534	0076-0496-0540	0096-0504-0539	0101-0486-0529	0067-0572-0540	0080-0555-0556	0088-0579-0529	0088-0562-0545	0104-0575-0539	0116-0563-0549
	Distance relative to ring Max int (µm)	-1.548					506.89				378.51	433.95			516.62	612.5		693.2	519.49
		-1.4835	412.08	432.55	585.41	408.17	526.43	673.65		499.67	393	458.68	395.33	642.27	532.52	621.76	491.09	685.2	539.87	431.19	867.841	578.87	521.29	469.76	503.43	505.93		595.43	461.17	510.69	490.66
		-1.419	432	419.52	558.74	422.97	546.53	781.25	421.06	513.427	390.53	491.33	383.34	683.34	526.68	632.46	498.32	673.8	577.06	451.79	822.2	576.85	521.3	493.17	487.8	536.9	623.34	577.11	483.96	535.62	520.64
		-1.3545	456.45	421.63	559.06	412.74	594.58	874.36	431.147	549.341	398.79	526.19	415.05	707.41	537.83	699.12	495.84	717.9	630.08	492.18	784.648	557.33	537.97	509.35	510.04	562.45	617.59	599.41	492.53	561.15	532.61
		-1.29	481.4	452.73	575.03	434.87	669.57	935.11	417.029	557.42	412.83	620.17	397.47	754.97	555.48	797.17	523.69	719.96	665.25	524.8	798.291	541.76	573.28	527.77	561.7	658.74	614.89	625.86	510.31	615.74	541.08
		-1.2255	571.35	488.44	574.53	412.04	756.88	954.15	450.142	605.342	421.25	668.36	407.74	758.03	626.84	912.95	523.27	755.51	712.47	578.39	781.932	573.43	636.86	579.72	578.42	711.36	634.38	709.17	578.8	626.53	576.07
		-1.161	693.79	586.22	617.37	399.31	762.95	885.66	432.734	621.417	462.41	743.67	440.85	752.44	715.92	974.83	550.97	794.22	753.12	681.13	802.16	601.44	665.14	639.66	641.44	825.78	642.23	800.49	656.25	694.87	660.83
		-1.0965	851.26	688.16	708.64	415.78	745.38	774.7	484.307	661.5	544.68	804.38	506.16	748	874.27	976.58	662.77	875.67	774.46	765.22	816.998	666.12	761.69	782.68	710.46	911.95	716.93	879.82	766.1	765.02	772.58
		-1.032	1008.72	845.02	857.99	434.97	725.46	717.55	552.993	710.401	580.39	780.99	574.85	764.67	983.03	883.68	802.91	925.62	788.25	877.78	866.172	750.32	862.62	942.36	847.25	984.21	863.24	919.1	823.84	920.92	884.94
		-0.9675	1098.54	922.51	918.74	500.38	672.24	690.92	634.257	734.538	688.7	760.01	672.75	837.93	1002.29	783.98	1001.68	891.69	782.08	972.58	993.357	906.07	979.29	1006.17	975.59	1024.42	1088.51	884.24	824.51	1002.31	931.46
		-0.903	1058.1	1000.38	952.58	552.26	607.66	696.64	653.025	743.852	800.29	729.22	816.97	927.5	992.99	695.17	1134.63	896.24	775.99	953.27	1247.8	1002.12	1125.35	976.91	1057.19	989.51	1176.7	876.06	833.05	1051.8	922.84
		-0.8385	932.35	969.19	885.79	623.66	572.42	721.6	657.983	730.588	843.91	708.91	953	1049.36	983.84	663.25	1178.03	866.18	742.42	953.16	1457.06	1049	1185.54	893.21	1035.64	925.9	1268.37	833.81	825.52	1039.14	875.92
		-0.774	795.98	930.85	878.02	609.91	564.72	744.97	634.192	728.892	867.15	739.4	1039.91	1110.15	921.95	681.14	1086.24	829.91	723.78	969.76	1546.6	1057.26	1150.58	824.7	941.47	853.25	1178.58	800.73	838.3	1003.92	789.71
		-0.7095	736.77	868.56	820.15	643.39	547.48	769.18	601.811	702.38	855.39	745.9	998.59	1080.1	916.32	639.61	1038.86	817.95	751.81	948.91	1416.31	1067.63	1012.23	789.51	842.07	823.62	1058.66	736.67	816.08	965.79	744.03
		-0.645	737.76	782.21	819.15	619.32	541.19	818.46	574.912	669.566	829.03	762.97	900.08	1070.11	898.1	664.41	1009.38	824.33	774.06	913.64	1208.71	1022.66	937.52	722.77	850.98	765.99	901.78	732.02	842.47	936.4	745.71
		-0.5805	729.63	793.1	831.95	592.92	556.08	869.53	553.125	670.115	805.47	771.83	841.34	1034.8	939.6	741.14	1000.7	812.4	836.02	867.88	1002.96	946.24	914.64	727.54	830.39	781.99	824.87	740.27	778.84	900.84	744.64
		-0.516	735.14	813.02	843.58	566.62	582.34	877.4	548.479	677.1	773.77	830.59	810.37	1087.01	976.34	867.9	1028.58	805.28	832.79	861.03	879.034	907.18	838.14	689.92	845.98	764.22	774.75	743.53	768.33	893.96	794.99
		-0.4515	777.64	799.83	880.21	605.46	571.23	876.96	542.575	693.965	709.96	905.9	808.77	1085.81	1073.9	990.2	1070.17	769.08	875.19	812.57	846.246	891.28	800.77	699.02	864.28	784.51	754.14	750.47	845.15	960.27	799.43
		-0.387	898.56	866.69	897.19	610.7	593.03	913.16	590.276	716.215	670.33	1000.36	864	1106.53	1157.15	1179.75	1139.87	766.18	969.17	746.37	814.79	928.39	827.35	722.25	879.32	851.26	779.17	794.86	932.44	1040.56	866.65
		-0.3225	995.96	980.49	961.91	647.29	687.36	960.21	616.073	691.405	741.89	1106.55	953.74	1115.44	1337.88	1409.25	1255.56	840.29	1105.89	760.94	833.8	1008	873.11	803.46	896.27	959.82	848.56	901.13	1038.07	1133.22	967.39
		-0.258	1262.89	1179.66	1129.71	749.74	884.02	1034.59	724.753	737.334	884	1309.31	1111.37	1129.64	1627.28	1695.99	1382.02	989.75	1266.98	874.7	901.216	1161.09	948.36	940.25	1019.47	1241.76	1011.36	1085.61	1157.3	1205.03	1111.09
		-0.1935	1610.9	1468.37	1387.21	932.43	1182.89	1208.99	834.004	832.02	1261.92	1451.36	1465.18	1308.41	2077.25	2077.81	1728.27	1275.6	1420.05	1144.66	1033.52	1425.34	1122.25	1177.49	1259.07	1675.41	1271.19	1376.11	1315.88	1523.58	1357.17
		-0.129	1965.63	1850.25	1711.86	1109.89	1437.92	1389.01	970.808	987.154	1726.49	1595.68	1944.21	1591.77	2610.95	2429.43	2153.6	1637.47	1570.01	1565.01	1282.19	1868.85	1393.84	1582.14	1672.32	2103.4	1587.55	1742.54	1540.73	1799.22	1625.1
		-0.0645	2218.72	2209.66	2031.57	1364.39	1615.51	1539.19	1181.46	1230.01	2137.33	1759.28	2336.99	1896.36	2957.12	2778.91	2464.05	1925.74	1615.29	1969.79	1509.12	2211.01	1740.22	2068.22	2162.7	2350.53	1968.38	1939.85	1755.59	2048.56	1869.48
		0	2277.22	2313.58	2139.59	1504.99	1620.08	1641.65	1276.91	1261.99	2268.41	1839.35	2485.3	2017.66	2989.56	2836.3	2649.82	1941.61	1632.32	2373.85	1579.28	2332.45	1993.71	2406.39	2391.69	2386.4	2251.89	1942.97	1906.35	2057.76	1955.36
		0.0645	2169.98	2149.35	2033.93	1454.53	1417.1	1605.51	1269.3	1226.21	2213.5	1674.89	2246.04	1830.86	2467.19	2579.23	2586.05	1698.89	1516.99	2210.48	1486.68	2192.84	1968.07	2365.88	2246.31	2119.13	2207.96	1832.3	1766.67	1765.53	1790.89
		0.129	1850.48	1873.88	1699.37	1266.55	1178.1	1418.5	1140.12	1065.48	1799.71	1449.27	1792.21	1544.6	1760.31	2105.37	2269.81	1316.05	1381.35	1770.98	1230.14	1849.19	1717.43	1961.23	1895.11	1688.38	1980.03	1581.88	1550.67	1399.7	1506.5
		0.1935	1572.14	1450.45	1402.75	1046.43	919.22	1191.59	929.788	829.384	1260.03	1180.18	1420.28	1315.78	1183.14	1572.35	1876.12	999.99	1236.82	1352.15	1016.69	1366.63	1326.12	1465.74	1463.84	1269.2	1587.56	1284.97	1329.44	1033.83	1297.78
		0.258	1308.2	1124.03	1183.33	881.91	689.71	1008.3	791.79	686.333	949.12	971.67	1142.23	1099.25	944.37	1192.86	1472.2	781.93	998.57	1111.07	852.382	1077.86	1100.59	1119.77	1117.1	996.53	1277.02	1099.68	1170.93	876.38	1112.29
		0.3225	1091.76	958.98	1098.97	754.77	615.04	837.04	626.018	582.267	773.55	853.38	1024.78	961.61	860.83	895.42	1150.71	654.39	810.94	928.4	805.17	911.29	944.51	911.64	947.01	810.42	990.16	941.63	1083.48	793.72	959.56
		0.387	953.39	914.26	1036.22	738.21	599.03	748.73	602.182	572.291	734.93	772.25	956.94	946.89	810.66	751.67	959.3	603.84	704.63	815.87	786.072	862.97	870.84	850.98	854.88	708.56	831.44	831.63	1001.3	785.9	846.42
		0.4515	909.52	889.14	981.72	733.34	605.2	723.06	560.145	580.342	707.07	709.38	921.83	922.39	835.29	620.23	876.03	575.75	623.24	740.37	763.569	778.52	863.19	782.5	796.57	682.98	794.9	766.45	925.6	771.67	801.45
		0.516	872.12	904.75	997.75	770.9	565.85	692.37	565.94	554.967	700.05	736.22	914.92	869.87	837.63	594.59	808.45	579.27	658.96	717.26	833.916	792.83	893.23	788.3	798.06	677.1	761.37	712.39	891.85	788.43	787.63
		0.5805	845.6	994.9	1026.89	790.05	546.31	658.76	573.419	527.963	720.73	741.39	942.79	865.79	876.34	575.59	797.25	588.46	664.06	715	981.949	821.21	953.44	809.02	828.15	683.25	769.46	725.41	843.57	817.03	785.82
		0.645	855.62	1098.56	1032.81	821.53	550.75	651.19	598.875	538.418	730.8	743.95	1000.75	840.97	859.82	574.14	809.02	647.72	657.28	704.01	1211.14	842.22	991.99	826.14	895.62	704.19	797.16	740.91	810.86	841.49	807.66
		0.7095	854.88	1141.29	1076.07	828.28	620.68	658.8	598.368	627.991	716.98	749.46	1109.28	936.03	913.75	625.44	850.98	671.62	683.21	680.92	1392.26	913.58	1099.46	833.07	981.87	772.1	843.2	779.08	804.61	933.34	809.65
		0.774	900.23	1122.91	1157.63	803.6	612.62	664.29	620.093	629.788	722.44	698	1127.15	997.79	925.29	649.4	1022.52	749.38	673.82	734.1	1513.8	1082.72	1124.85	865.12	1058.41	873.41	925	902.28	820.24	1009.87	829.06
		0.8385	971.97	1007.01	1259.54	752.17	689.8	693.35	624.959	605.117	683.48	715.43	1073.14	1003.6	912.21	676.55	1146.51	841.78	660.49	875.11	1503.03	1276.59	1082.29	936.93	1053.36	880.84	1015.28	1013.06	910.21	1142.98	844.13
		0.903	1089.4	880.29	1354.49	654.91	721.32	682.33	624.945	655.147	659.29	702.83	940.12	897.32	833.41	754.4	1182.81	844.05	668.98	1024.74	1284.47	1285.67	945.02	1042.17	950.36	852.25	1093.82	1001.38	983.25	1107.49	937.82
		0.9675	1170.7	667.06	1374.17	600.29	681.16	689.79	619.002	617.151	607.19	734	779.62	748.19	715.79	883.86	1107.99	806.2	665.33	1082.52	1036.91	1238.32	786.09	1106.06	789.58	746.22	1170.94	948.79	1016.92	982.11	986.65
		1.032	1183.98	559.08	1244.29	569.98	589.32	689.41	582.143	551.465	571.69	775.92	687.65	612.88	638.99	988.3	1041.25	704.35	614.56	986.03	873.043	1031.42	666.33	1088.31	694.05	653.05	1111.8	826.02	1067.95	822.27	898.39
		1.0965	1122.42	513.06	981.98	514.36	536.03	688.18	538.739	531.716	573.49	775.9	635.77	557.79	543.49	965.29	984.01	606.97	565.35	821.77	801.137	826.27	648.13	955.42	619.65	588.52	998.36	705.87	1094.17	774.08	820.37
		1.161	1016.69	448.11	818.64	498.41	466.42	648.33	462.379	480.623	552.49	730.88	653.2	547.04	513.92	834.05	953.83	530.23	493.66	688.78	841.229	761.46	621.19	780.67	548.26	553.99	860.17	642.55	1089.81	702.86	688.4
		1.2255	918.06	450.23	685.74	500.29	436.58	601.67	443.475	462.734	558.54	679.78	694.27	552.08	519.3	698.62	921.78	461.42	469.64	566.95	936.685	708.54	692.52	675.85	521.52	517.45	722.13	604.09	1075.29	667.63	606.46
		1.29	864.83	437.25	578.83	477.9	417.34	552.27	427.858	436.509	551.28	614.25	679.86	593.44	513.38	588.24	971	417.91	433.29	501.05	1002.29	629.7	716.45	616.12	530.98	524.46	677.3	603.49	957.18	614.72	542.09
		1.3545	885.2	456.22	523.23	477.44	393.13	489.48	408.548	427.613	524.98	554.91	690.92	602.33	516.87	566.34	1023.24	412.68	432.15	461.18	1104.6	569.12	783.02	623.31	514.04	500.88	647.25	624.34	880.16	595.26	540.46
		1.419	865.49	460.54	498.83	458.86	407.56	458.86	389.614	421.807	539.6	543.39	693.37	588.54	548.99	529.52	1014.55	394.28	443.34	447.67	1113.61	507.34	867.73	598.47	512.47	495.73	628.08	645.99	805.68	596.46	535.33
		1.4835	859.74	444.85	505.89	451.86	392.77	440.28	413.009	398.055	539.96		670.85	614.12	544.07	452.74	931.58	386.06	425.57	456.2	1047.99	484.63	991.41	626.56	533.69	505.75	618.63	641.92	761.94	564.72	559.96
		1.548	875.11	435.03	470.05			428.25	392.827	402.92			657.54	612.35			851.15			468.91	929.734	494.94	1030.09	616.6	534.29		619.48
		1.6125
Corrected signal Intensity channel 3 Signal/Average noise
		image name:	VC2773_dm1_bub1_cls2_NM_20220525_22			VC2773_dm1_bub1_cls2_NM_20220525_31					VC2773_dm1_bub1_cls2_NM_20220525_33		VC2773_dm1_bub1_cls2_NM_20220602_19					VC2773_dm1_bub1_cls2_NM_20220602_23		VC2773_dm1_bub1_cls2_NM_20220602_24						VC2773_dm1_bub1_cls2_NM_20220602_27
		MEASURED SAMPLE # (measurable chromosome)	1	2	3	1	2	3	4	5	1	2	1	2	3	4	5	1	2	1	2	3	4	5	6	1	2	3	4	5	6
		Line Scan coordinates (ROI)	0048-0707-0354	0072-0718-0360	0089-0705-0440	0068-0531-0432	0093-0555-0425	0093-0555-0425	0108-0542-0418	0117-0546-0422	0096-0586-0441	0120-0590-0435	0056-0514-0646	0072-0498-0648		0088-0507-0645	0100-0507-0645	0088-0664-0541	0096-0649-0537	0048-0504-0439	0068-0526-0450	0068-0523-0448	0074-0538-0431	0096-0543-0438	0101-0527-0428
	Relative Distance between measure points (µm)	-1.548					388.901				373.672	374.774			380.44	391.913		373.425	380.754
		-1.4835	397.25	348.416	0	376.208	400.465	388.901		373.419	371.291	383.166	399.012	363.508	385.536	390.57	383.491	380.496	363.965	362.103	384.493	374.124	362.045	358.48	352.336	376.255		370.597	370.597	358.024	392.408
		-1.419	362.875	359.1	0.0645	371.325	385.419	400.465	364.18	372.76	357.971	395.812	393.447	368.576	385.149	395.103	399.08	369.724	361.286	357.98	384.167	375.488	367.365	361.64	348.738	371.872	372.209	371.811	371.811	357.463	384.015
		-1.3545	359.485	363.97	0.129	375.321	374.901	385.419	373.625	364.043	366.014	385.923	397.995	367.384	389.431	370.95	375.657	382.182	358.179	362.422	381.576	369.74	355.717	361.364	358.95	379.395	391.647	370.224	370.224	361.086	388.306
		-1.29	370.175	361.114	0.1935	388.124	377.075	374.901	372.916	358.409	363.839	393.067	387.32	373.439	394.161	384.487	391.994	388.686	348.872	362.503	377.012	380.066	351.611	371.13	346.849	381.384	376.486	369.145	369.145	362.101	393.329
		-1.2255	368.361	359.278	0.258	403.259	371.028	377.075	371.262	360.437	388.265	388.884	402.739	382.033	411.334	372.272	388.075	376.684	376.117	369.542	359.892	366.487	358.147	371.198	358.148	378.067	360.98	366.78	366.78	351.236	393.689
		-1.161	358.749	355.457	0.3225	380.695	371.693	371.028	368.912	369.454	379.247	370.683	384.454	385.193	376.371	371.47	387.351	381.586	382.339	368.083	357.832	364.849	357.827	365.032	366.811	373.842	364.192	366.803	366.803	361.049	407.246
		-1.0965	358.439	362.788	0.387	389.565	375.592	371.693	380.656	374.537	369.114	387.241	390.999	382.585	379.259	376.173	389.102	365.52	363.885	382.351	358.281	383.563	374.089	374.268	362.158	359.557	353.065	384.921	384.921	355.271	387.997
		-1.032	353.563	372.78	0.4515	386.733	378.01	375.592	384.462	367.338	373.426	379.392	402.859	380.231	389.818	378.099	392.97	359.298	364.56	368.264	366.48	374.909	365.792	372.239	358.032	355.863	364.202	352.768	352.768	358.224	368.723
		-0.9675	351.967	369.319	0.516	386.295	391.117	378.01	366.415	372.664	376.459	401.56	406.827	382.737	383.619	379.77	370.207	370.803	377.202	376.371	370.182	380.529	367.785	371.397	364.836	366.736	381.47	352.429	352.429	362.259	363.207
		-0.903	353.569	358.299	0.5805	365.678	382.846	391.117	377.262	373.689	375.776	396.503	389.941	377.264	402.342	372.433	367.189	366.755	376.548	385.195	360.358	379.354	362.002	350.151	378.018	372.542	375.37	366.409	366.409	360.21	384.411
		-0.8385	353.603	368.137	0.645	364.563	370.209	382.846	369.342	375.406	380.2	392.756	381.738	390.978	386.004	384.25	365.174	364.019	382.603	382.46	358.877	366.427	364.67	355.722	374.148	370.193	384.825	364.564	364.564	372.478	364.331
		-0.774	349.439	369.23	0.7095	370.696	363.159	370.209	386.248	374.145	390.686	412.507	390.297	381.335	378.421	385.901	370.764	377.45	376.492	382.195	364.938	362.93	367.436	358.934	367.871	356.608	381.889	360.185	360.185	371.232	370.016
		-0.7095	356.002	374.4	0.774	358.607	354.604	363.159	377.418	380.771	382.811	398.484	395.684	388.147	380.401	366.556	370.683	363.298	363.42	403.329	369.84	366.712	369.669	371.09	358.71	357.666	368.518	358.922	358.922	378.311	371.425
		-0.645	359.413	370.436	0.8385	360.527	367.799	354.604	365.357	382.354	388.686	390.198	398.436	387.142	386.993	382.271	370.963	361.633	375.423	404.639	381.398	384.378	378.165	397.795	359.388	363.439	366.503	364.921	364.921	387.306	383.943
		-0.5805	379.624	372.496	0.903	389.382	373.83	367.799	366.27	363.745	398.52	376.972	399.113	378.972	396.622	366.918	373.321	360.376	354.003	395.697	373.774	373.901	377.726	388.623	367.382	375.476	370.212	376.882	376.882	377.977	389.767
		-0.516	381.75	375.306	0.9675	377.125	366.625	373.83	367.35	377.865	390.825	384.383	390.407	381.193	385.083	377.502	371.092	353.191	360.623	375.455	376.653	372.851	373.2	371.607	378.625	354.104	376.321	378.538	378.538	380.8	382.742
		-0.4515	379.87	395.261	1.032	378.404	370.558	366.625	359.527	362.643	385.768	396.693	397.977	390.412	376.481	382.588	386.257	340.837	358.31	365.96	357.198	362.534	366.234	362.716	374.416	359.162	370.794	370.531	370.531	371.6	366.798
		-0.387	373.389	382.52	1.0965	369.654	379.425	370.558	366.969	369.5	364.659	391.89	389.22	370.719	388.35	378.475	399.691	353.498	370.627	363.946	371.543	350.835	362.349	374.338	366.063	372.663	375.889	364.234	364.234	365.307	379.96
		-0.3225	377.601	400.377	1.161	395.005	380.914	379.425	372.139	374.982	368	393.325	397.253	383.26	383.658	387.286	385.106	373.967	373.976	361.942	365.821	359.667	349.989	368.739	373.67	366.122	374.127	368.156	368.156	375.277	356.798
		-0.258	361.314	398.479	1.2255	383.743	375.82	380.914	379.421	376.67	388.671	393.269	398.913	392.313	363.853	396.815	397.044	367.665	357.565	363.876	366.32	363.72	360.969	358.532	367.51	365.522	380.531	373.292	373.292	385.576	339.21
		-0.1935	366.481	377.575	1.29	386.447	375.234	375.82	385.353	378.904	371.134	393.435	371.761	388.456	364.803	386.811	370.931	365.348	361.039	371.74	353.471	369.136	377.296	353.298	366.946	371.486	379.352	361.834	361.834	369.926	359.113
		-0.129	384.734	381.939	1.3545	391.382	367.249	375.234	385.484	391.984	371.104	387.492	367.085	375.21	364.787	373.906	360.24	357.69	372.291	375.381	369.754	366.699	400.15	346.156	378.591	374.527	377.527	377.294	377.294	363.807	370.656
		-0.0645	365.238	373.813	1.419	381.425	368.906	367.249	391.81	384.651	365.45	369.231	376.791	374.662	379.68	371.084	359.375	365.407	369.455	383.892	366.329	370.089	377.26	356.163	362.711	373.079	397.087	365.781	365.781	360.415	379.02
		0	355.505	368.048	1.4835	371.717	385.668	368.906	375.764	383.239	372.176	386.921	385.212	386.397	397.584	373.897	371.595	369.236	359.161	374.473	374.796	357.962	357.358	360.524	370.302	357.728	382.07	361.784	361.784	378.159	368.18
		0.0645	370.114	375.747	1.548	372.178	385.084	385.668	391.242	377.926	368.201	378.545	380.27	400.523	386.119	381.429	382.766	361.063	373.004	377.28	367.382	366.827	370.509	359.741	383.808	365.238	367.471	369.642	369.642	370.337	380.78
		0.129	370.572	390.157	1.6125	403.646	367.528	385.084	386.53	375.942	362.765	359.225	367.258	383.487	385.861	377.44	379.407	378.042	366.29	371.594	350.451	344.52	369.164	356.281	362.462	365.968	375.482	364.863	364.863	368.419	380.825
		0.1935	365.536	385.648	1.677	401.648	366.866	367.528	371.775	372.108	356.084	373.756	376.218	377.33	380.281	370.867	372.612	371.579	355.872	373	358.12	359.257	358.871	354.774	363.178	371.128	367.652	365.671	365.671	362.42	376.26
		0.258	360.229	356.78	1.7415	383.41	369.619	366.866	372.166	377.566	371.624	385.488	382.227	390.181	388.688	385.235	397.496	373.089	359.676	357.164	360.719	361.36	356.132	355.866	357.164	366.393	377.734	363.831	363.831	365.867	382.37
		0.3225	355.443	380.724	1.806	396.139	369.859	369.619	370.424	380.913	384.785	384.134	361.235	385.995	375.299	394.051	396.625	359.833	364.619	364.631	365.964	361.346	353.034	356.349	367.374	369.337	363.202	367.592	367.592	374.599	358.983
		0.387	383.169	376.222	1.8705	403.543	360.787	369.859	375.674	366.685	380.451	373.561	383.316	378.899	374.651	380.575	393.179	379.975	345.613	358.165	362.054	354.56	355.474	364.012	370.736	368.893	368.703	348.507	348.507	365.558	387.753
		0.4515	386.592	364.695	1.935	386.443	360.902	360.787	387.75	377.066	377.019	379.02	379.652	383.786	394.036	364.914	373.254	347.432	347.832	361.774	363.299	346.296	364.15	366.59	367.407	374.177	354.43	378.474	378.474	354.841	374.678
		0.516	381.639	360.317	1.9995	371.466	361.055	360.902	376.363	380.932	382.335	373.44	374.763	388.173	400.646	382.187	375.324	364.707	357.377	352.412	359.354	360.203	363.321	364.47	364.973	378.543	359.579	363.891	363.891	374.286	386.185
		0.5805	379.335	360.04	2.064	364.136	363.605	361.055	371.791	390.527	383.21	377.147	374.208	393.556	398.34	377.657	382.301	360.841	361.837	365.534	358.148	360.943	369.387	363.658	359.415	390.008	370.086	367.006	367.006	377.087	378.313
		0.645	375.298	376.931	2.1285	361.255	371.25	363.605	384.202	380.91	392.388	392.128	370.688	383.372	388.897	380.365	389	354.106	362.35	376.905	365.32	377.173	357.239	368.193	348.747	365.825	366.921	361.021	361.021	384.438	377.447
		0.7095	395.19	363.211	2.193	377.4	385.691	371.25	374.338	367.286	404.996	386.71	370.118	359.409	391.9	377.644	371.048	365.458	355.027	383.259	359.819	372.462	346.59	352.68	358.185	369.788	354.56	361.65	361.65	371.109	363.53
		0.774	383.379	362.104	2.2575	374.355	385.295	385.691	359.182	383.935	381.858	375.183	357.445	371.241	402.147	392.961	372.082	370.163	372.936	382.161	365.348	362.206	357.277	357.23	346.568	366.419	365.361	354.799	354.799	359.375	361.488
		0.8385	355.123	380.912	2.322	359.733	375.796	385.295	383.406	391.462	381.383	363.189	354.515	373.717	382.27	386.338	371.937	358.04	361.685	372.625	360.069	362.689	357.492	338.911	373.433	365.51	365.352	349.492	349.492	359.131	374.043
		0.903	372.632	372.453	2.3865	370.055	367.106	375.796	372.747	383.278	383.279	369.411	376.623	369.247	365.422	383.082	371.799	361.113	377.532	377.075	369.993	366.674	361.154	352.237	369.802	376.96	353.842	355.693	355.693	368.722	381.569
		0.9675	366.043	374.039	2.451	359.519	360.614	367.106	386.666	374.32	387.255	379.223	372.679	370.858	372.109	382.469	375.512	362.332	377.257	370.506	381.878	385.444	359.639	359.457	362.158	365.785	356.512	364.634	364.634	369.091	391.12
		1.032	359.371	405.984	2.5155	370.705	358.531	360.614	380.417	369.081	385.437	383.744	368.717	375.474	374.068	376.715	375.528	358.091	378.214	367.313	382.017	401.076	349.677	355.804	361.229	358.988	353.328	377.874	377.874	357.238	398.459
		1.0965	365.612	405.257	2.58	360.841	356.461	358.531	383.355	362.934	389.174	367.998	359.719	383.042	373.763	383.718	359.331	358.6	378.748	377.491	392.022	408.991	350.622	355.263	354.454	362.037	357.662	384.04	384.04	361.884	386.048
		1.161	368.712	381.395	2.6445	358.895	354.974	356.461	382.546	363.814	376.707	381.16	381.386	381.809	373.368	373.892	377.372	361.928	375.627	365.799	391.021	396.668	367.402	372.737	360.424	366.645	358.629	381.414	381.414	368.365	374.245
		1.2255	366.227	387.989	2.709	359.551	376.92	354.974	391.458	369.097	391.317	389.636	361.497	382.737	380.029	375.159	358.701	358.845	368.085	385.937	386.626	385.438	371.695	361.903	366.147	362.485	360.067	384.228	384.228	352.734	370.105
		1.29	352.526	402.684	2.7735	379.87	381.18	376.92	398.682	356.381	403.611	390.392	371.576	386.757	372.416	388.379	355.319	362.722	369.731	371.342	368.649	368.924	360.45	371.024	367.043	375.28	362.331	362.099	362.099	362.774	378.97
		1.3545	366.611	415.809	2.838	376.209	386.888	381.18	390.468	351.177	405.332	395.652	366.717	393.252	379.858	372.402	356.567	363.01	367.051	353.026	371.547	371.118	366.353	352.776	361.754	364.104	377.492	379.971	379.971	356.852	392.838
		1.419	372.016	383.07	2.9025	373.307	367.817	386.888	384.278	356.511	423.033	397.533	366.803	384.628	373.337	382.37	365.385	359.583	377.183	374.776	379.836	378.459	378.678	363.059	358.532	373.909	370.473	367.327	367.327	375.75	390.442
		1.4835	363.252	373.536	2.967	359.332	359.507	367.817	378.616	354.108	422.665		378.858	400.295	372.352	363.677	379.757	373.64	379.19	387.95	392.169	388.243	364.499	357.8	370.334	362.938	359.302	359.295	359.295	372.092	391.035
		1.548	371.341	387.06	3.0315			359.507	362.733	360.091			378.445	381.619			386.907			376.965	368.862	380.827	372.033	367.938	350.073		356.725
		1.6125
		Average Noise Intensity of channel 3	368.008	375.86	1.51575	377.139	372.716	372.716	377.127	372.66	381.431	384.699	381.467	381.49	383.251	379.813	377.428	365.687	367.113	373.01	369.409	370.805	364.285	362.706	363.888	368.503	369.11	367.06	367.06	367.193	378.357
Corrected signal Intensity channel 3 Signal/Average noise
		image name:	N2_dm1_bub1_cls2_NM_20220525_02						N2_dm1_bub1_cls2_NM_20220525_05					N2_dm1_bub1_cls2_NM_20220525_07			N2_dm1_bub1_cls2_NM_20220525_09						N2_dm1_bub1_cls2_NM_20220525_11					N2_dm1_bub1_cls2_NM_20220525_15					Average intensity/noise
		MEASURED SAMPLE # (measurable chromosome)	1	2	3	4	5	6	1	2	3	4	5	1	2	3	1	2	3	4	5	6	1	2	3	4	5	1	2	3	4
	Distance relative to ring Max int (µm)	-1.548	0	0	0	0	1.35999	0	0	0	0.992343	1.12803	0	0	1.34799	1.61264	0	1.89561	1.41507	0	0	0	0	0	0	0	0	0	0	0	0		0.336264
		-1.4835	1.11976	1.15083	386.218	1.08228	1.41241	1.80741	0	1.34082	1.03033	1.19231	1.03634	1.68358	1.38948	1.63702	1.30115	1.87373	1.47058	1.15597	2.34927	1.56112	1.43099	1.29515	1.38348	1.37293	0	1.62216	1.25639	1.3908	1.29682		14.5814
		-1.419	1.17389	1.11616	368.623	1.12152	1.46634	2.0961	1.1165	1.37774	1.02386	1.27718	1.00491	1.79124	1.37424	1.66519	1.3203	1.84256	1.57189	1.2112	2.22571	1.55567	1.43102	1.3597	1.34052	1.45698	1.68877	1.57225	1.31848	1.45869	1.37606		14.102
		-1.3545	1.24033	1.12177	368.834	1.0944	1.59526	2.34591	1.14324	1.47411	1.04551	1.3678	1.08804	1.85433	1.40334	1.84069	1.31373	1.96316	1.71631	1.31948	2.12406	1.50303	1.47678	1.40431	1.40164	1.52631	1.67319	1.633	1.34182	1.52822	1.40769		14.1649
		-1.29	1.30813	1.20452	379.37	1.15308	1.79646	2.50891	1.10581	1.49579	1.08232	1.61209	1.04195	1.979	1.44939	2.09885	1.38752	1.96879	1.81211	1.40693	2.16099	1.46104	1.57371	1.45509	1.54361	1.78761	1.66587	1.70506	1.39026	1.67688	1.43008		14.608
		-1.2255	1.55255	1.29952	379.04	1.09254	2.03071	2.55999	1.19361	1.62438	1.10439	1.73736	1.06887	1.98702	1.63559	2.40368	1.38641	2.066	1.94074	1.5506	2.11671	1.54645	1.74825	1.59832	1.58956	1.9304	1.71868	1.93203	1.57685	1.70627	1.52256		14.6986
		-1.161	1.88526	1.55967	407.303	1.05879	2.047	2.37623	1.14745	1.66752	1.2123	1.93312	1.15567	1.97237	1.86802	2.5666	1.4598	2.17186	2.05147	1.82604	2.17147	1.62198	1.82588	1.76358	1.76274	2.2409	1.73994	2.18081	1.78785	1.89238	1.74658		15.793
		-1.0965	2.31316	1.83089	467.518	1.10246	1.99986	2.07852	1.2842	1.77508	1.42799	2.09094	1.32688	1.96073	2.2812	2.57121	1.75602	2.39459	2.10959	2.05147	2.21163	1.79641	2.09092	2.15789	1.95242	2.47474	1.94232	2.39694	2.08712	2.08343	2.04193		18.0382
		-1.032	2.74103	2.24823	566.05	1.15334	1.94641	1.92519	1.46633	1.9063	1.52161	2.03013	1.50695	2.00443	2.56498	2.32662	2.12732	2.53118	2.14716	2.35323	2.34475	2.02349	2.36798	2.59814	2.32833	2.67083	2.33871	2.50395	2.24443	2.508	2.3389		21.6144
		-0.9675	2.9851	2.45439	606.129	1.32678	1.80362	1.85374	1.68181	1.97107	1.80557	1.9756	1.76359	2.19646	2.61523	2.06412	2.65396	2.4384	2.13035	2.60738	2.68904	2.44352	2.68825	2.77407	2.68102	2.77995	2.94901	2.40898	2.24625	2.72966	2.46186		23.1485
		-0.903	2.87521	2.66157	628.455	1.46434	1.63036	1.86909	1.73158	1.99606	2.09813	1.89556	2.14165	2.43125	2.59097	1.8303	3.00621	2.45084	2.11376	2.55561	3.37782	2.70255	3.0892	2.69339	2.90526	2.68521	3.18794	2.38669	2.26952	2.86444	2.43907		24.0137
		-0.8385	2.53351	2.57859	584.391	1.65366	1.53581	1.93606	1.74473	1.96047	2.21249	1.84277	2.49825	2.75069	2.56709	1.74625	3.1212	2.36864	2.02232	2.55532	3.94429	2.82898	3.25443	2.46263	2.84604	2.5126	3.43629	2.27159	2.24901	2.82996	2.31506		22.5162
		-0.774	2.16294	2.47658	579.264	1.6172	1.51515	1.99876	1.68164	1.95592	2.27341	1.92202	2.72608	2.91003	2.40561	1.79336	2.878	2.26946	1.97154	2.59982	4.18669	2.85125	3.15846	2.27374	2.58725	2.31545	3.19303	2.18147	2.28382	2.73404	2.08721		22.2853
		-0.7095	2.00205	2.31086	541.085	1.70598	1.46889	2.06371	1.59578	1.88478	2.24258	1.93892	2.61776	2.83126	2.39092	1.68401	2.75247	2.23675	2.0479	2.54393	3.83398	2.87922	2.77867	2.17672	2.31409	2.23504	2.86814	2.00695	2.22329	2.6302	1.96648		20.873
		-0.645	2.00474	2.08112	540.426	1.64216	1.45202	2.19593	1.52445	1.79672	2.17348	1.98329	2.35952	2.80508	2.34337	1.74931	2.67436	2.2542	2.1085	2.44937	3.272	2.75794	2.57359	1.99272	2.33858	2.07865	2.44312	1.99428	2.29518	2.55016	1.97092		20.7686
		-0.5805	1.98265	2.11009	548.87	1.57215	1.49197	2.33295	1.46668	1.7982	2.11171	2.00632	2.20554	2.71252	2.45166	1.95133	2.65136	2.22157	2.27728	2.32669	2.71504	2.55185	2.51078	2.00587	2.282	2.12207	2.23475	2.01675	2.12183	2.45332	1.96809		21.018
		-0.516	1.99762	2.16309	556.543	1.50242	1.56242	2.35407	1.45436	1.81694	2.0286	2.15907	2.12435	2.84938	2.54752	2.28507	2.72523	2.2021	2.26848	2.30833	2.37957	2.44651	2.30078	1.90215	2.32484	2.07385	2.09897	2.02564	2.0932	2.43458	2.10116		21.2784
		-0.4515	2.11311	2.128	580.709	1.6054	1.53261	2.35289	1.43871	1.8622	1.86131	2.35483	2.12016	2.84623	2.80208	2.60707	2.83543	2.10311	2.38398	2.17841	2.29081	2.40363	2.19819	1.92724	2.37513	2.12891	2.04313	2.04454	2.30248	2.61517	2.1129		22.1475
		-0.387	2.44169	2.30588	591.912	1.6193	1.5911	2.45001	1.56519	1.9219	1.75741	2.60037	2.26494	2.90055	3.0193	3.10613	3.0201	2.09518	2.63998	2.00094	2.20566	2.50371	2.27116	1.99128	2.41646	2.31005	2.11094	2.16548	2.54029	2.83382	2.29056		22.65
		-0.3225	2.70636	2.60865	634.61	1.71632	1.84419	2.57625	1.6336	1.85533	1.94502	2.87641	2.50019	2.9239	3.49087	3.71038	3.32662	2.29784	3.0124	2.04	2.25712	2.71841	2.39678	2.21518	2.46304	2.60465	2.29894	2.45499	2.82807	3.08617	2.55682		24.3295
		-0.258	3.4317	3.13856	745.314	1.98797	2.37183	2.77581	1.92178	1.97857	2.31759	3.40347	2.91341	2.96112	4.24599	4.46533	3.66168	2.70655	3.4512	2.34498	2.43961	3.13127	2.60334	2.59232	2.80161	3.36974	2.74	2.95758	3.15289	3.28174	2.93662		28.531
		-0.1935	4.37736	3.90669	915.197	2.47238	3.1737	3.24373	2.21147	2.23265	3.30839	3.77272	3.84091	3.42973	5.42008	5.47061	4.57907	3.48823	3.86815	3.06871	2.79777	3.8439	3.08069	3.2464	3.46005	4.54653	3.44393	3.74901	3.58492	4.14926	3.58701		35.0535
		-0.129	5.34128	4.9227	1129.38	2.94292	3.85795	3.72672	2.57422	2.64894	4.52635	4.14787	5.09667	4.1725	6.81264	6.39638	5.70598	4.47779	4.27664	4.19562	3.47091	5.03998	3.82623	4.36205	4.5957	5.70796	4.30102	4.74729	4.19749	4.89993	4.29515		43.2637
		-0.0645	6.02901	5.87894	1340.31	3.61774	4.33442	4.12966	3.1328	3.30063	5.60346	4.57314	6.12632	4.97093	7.71589	7.31652	6.52852	5.26609	4.39998	5.2808	4.08522	5.96273	4.77708	5.70219	5.94332	6.37859	5.33278	5.28483	4.78284	5.57898	4.94105		51.2856
		0	6.18797	6.15542	1411.57	3.99055	4.34668	4.40456	3.38588	3.38645	5.94711	4.78128	6.51511	5.28889	7.80053	7.46762	7.02072	5.30949	4.44637	6.36404	4.27516	6.29023	5.47294	6.63455	6.57261	6.47593	6.10087	5.29333	5.19356	5.60403	5.16803		54.0501
		0.0645	5.89656	5.71848	1341.86	3.85675	3.80209	4.30759	3.3657	3.29044	5.80315	4.35377	5.8879	4.79923	6.43754	6.79079	6.85176	4.64575	4.13221	5.92606	4.02449	5.91372	5.40255	6.52286	6.17309	5.75064	5.98185	4.99183	4.81303	4.80818	4.73333		51.2705
		0.129	5.02838	4.98557	1121.14	3.35831	3.16085	3.80584	3.02316	2.85912	4.71832	3.76729	4.6982	4.04886	4.5931	5.54317	6.01388	3.59884	3.76274	4.74781	3.33003	4.98696	4.71452	5.40722	5.20795	4.58172	5.36434	4.30959	4.22457	3.81189	3.98169		42.8543
		0.1935	4.27203	3.85901	925.449	2.77466	2.46627	3.19704	2.46545	2.22558	3.30343	3.0678	3.72321	3.44905	3.08712	4.1398	4.9708	2.73455	3.36904	3.62497	2.7522	3.68557	3.64033	4.04112	4.02278	3.4442	4.30105	3.50071	3.62186	2.8155	3.43004		35.2219
		0.258	3.55482	2.99055	780.689	2.33842	1.8505	2.70527	2.09953	1.84172	2.48832	2.5258	2.99431	2.88146	2.4641	3.14065	3.90061	2.13825	2.72006	2.97866	2.30742	2.90681	3.02123	3.08727	3.0699	2.70426	3.45973	2.99591	3.19002	2.3867	2.93979		29.599
		0.3225	2.96668	2.55143	725.034	2.00131	1.65016	2.24578	1.65997	1.56246	2.02802	2.21831	2.68642	2.52067	2.24613	2.35753	3.04882	1.78948	2.20896	2.48894	2.17961	2.4576	2.59278	2.51344	2.60248	2.19922	2.68256	2.56533	2.95178	2.16159	2.53612		27.2658
		0.387	2.59068	2.43245	683.635	1.9574	1.6072	2.00885	1.59676	1.53569	1.92677	2.00742	2.50858	2.48208	2.11522	1.97905	2.54167	1.65125	1.91938	2.18726	2.12792	2.32729	2.39054	2.3462	2.3493	1.92281	2.25255	2.26565	2.72789	2.14029	2.23709		25.6473
		0.4515	2.47147	2.36561	647.679	1.94448	1.62376	1.93997	1.4853	1.5573	1.85373	1.84399	2.41654	2.41786	2.17949	1.63299	2.32105	1.57443	1.69768	1.98485	2.067	2.09954	2.36954	2.1574	2.18905	1.85339	2.15356	2.08808	2.52166	2.10154	2.11824		24.3003
		0.516	2.36984	2.40714	658.255	2.04408	1.51818	1.85763	1.50066	1.48921	1.83533	1.91376	2.39843	2.28019	2.18559	1.56548	2.142	1.58406	1.79498	1.9229	2.25743	2.13813	2.45201	2.17339	2.19315	1.83743	2.06272	1.9408	2.42971	2.14718	2.08171		24.6475
		0.5805	2.29778	2.64699	677.48	2.09485	1.46575	1.76746	1.52049	1.41674	1.88954	1.9272	2.47149	2.26949	2.2866	1.51546	2.11232	1.60919	1.80887	1.91684	2.65816	2.21467	2.61729	2.23051	2.27584	1.85412	2.08464	1.97627	2.29818	2.22507	2.07693		25.3451
		0.645	2.32501	2.92279	681.385	2.17832	1.47767	1.74715	1.58799	1.4448	1.91594	1.93385	2.62343	2.20443	2.24349	1.51164	2.14351	1.77124	1.7904	1.88738	3.27859	2.27133	2.72311	2.27771	2.46125	1.91095	2.15968	2.0185	2.20907	2.29168	2.13465		25.5459
		0.7095	2.323	3.03647	709.926	2.19622	1.66529	1.76756	1.58665	1.68516	1.87971	1.94817	2.90793	2.45361	2.38421	1.6467	2.25468	1.8366	1.86103	1.82547	3.76887	2.46377	3.01813	2.29682	2.69828	2.09523	2.28441	2.12249	2.19204	2.54183	2.13991		26.6485
		0.774	2.44623	2.98757	763.734	2.13078	1.64366	1.78229	1.64426	1.68998	1.89403	1.81441	2.95478	2.61551	2.41432	1.70979	2.70918	2.04924	1.83546	1.96804	4.09788	2.91992	3.08783	2.38518	2.90862	2.37016	2.50603	2.45813	2.23462	2.75024	2.19121		28.6184
		0.8385	2.64117	2.67921	830.968	1.99441	1.85074	1.86026	1.65716	1.62378	1.79189	1.85972	2.81319	2.63074	2.38019	1.78127	3.03769	2.30192	1.79915	2.34608	4.06872	3.44275	2.971	2.58317	2.89474	2.39032	2.75062	2.75993	2.47973	3.11275	2.23104		31.0242
		0.903	2.96027	2.34207	893.61	1.73652	1.93531	1.8307	1.65712	1.75803	1.72847	1.82696	2.46449	2.35214	2.17458	1.98624	3.13387	2.30812	1.82227	2.74722	3.47709	3.46724	2.59418	2.87332	2.61169	2.31273	2.9634	2.72811	2.67872	3.0161	2.47866		33.1578
		0.9675	3.18119	1.77475	906.594	1.5917	1.82756	1.85071	1.64136	1.65607	1.59188	1.90799	2.04374	1.96123	1.86768	2.32709	2.93563	2.20462	1.81233	2.90212	2.80695	3.33954	2.1579	3.04947	2.16985	2.025	3.17233	2.58484	2.77045	2.67464	2.60772		33.4838
		1.032	3.21727	1.48747	820.907	1.51133	1.58115	1.84969	1.54363	1.47981	1.4988	2.01696	1.80265	1.60654	1.66729	2.60207	2.7588	1.9261	1.67403	2.64344	2.36335	2.78157	1.82914	3.00053	1.90732	1.77217	3.01211	2.25037	2.90947	2.23934	2.37445		30.3522
		1.0965	3.04999	1.36503	647.851	1.36385	1.43817	1.84639	1.42854	1.42681	1.50352	2.0169	1.66664	1.46213	1.41811	2.54149	2.60714	1.65981	1.53999	2.20308	2.1687	2.22831	1.77918	2.63414	1.70286	1.59706	2.70478	1.92304	2.9809	2.1081	2.16824		24.2201
		1.161	2.76269	1.19222	540.089	1.32156	1.25141	1.73947	1.22606	1.28971	1.44847	1.89988	1.71234	1.43396	1.34095	2.19595	2.52718	1.44996	1.34471	1.84655	2.27723	2.05353	1.70523	2.15235	1.50667	1.50335	2.33039	1.75053	2.96902	1.91414	1.81945		20.3467
		1.2255	2.49468	1.19786	452.41	1.32654	1.17135	1.61428	1.17593	1.24171	1.46433	1.76705	1.82	1.44717	1.35499	1.83938	2.44227	1.26179	1.27928	1.51993	2.53563	1.91081	1.90104	1.86336	1.43319	1.40419	1.95641	1.64575	2.92947	1.8182	1.60288		17.2355
		1.29	2.35003	1.16333	381.877	1.26717	1.11973	1.48174	1.13452	1.17133	1.4453	1.5967	1.78223	1.55558	1.33954	1.54876	2.57267	1.14281	1.18026	1.34326	2.71322	1.6982	1.96673	1.69868	1.45919	1.42322	1.83496	1.64412	2.60769	1.67411	1.43275		14.7319
		1.3545	2.40539	1.2138	345.195	1.26595	1.05477	1.31328	1.08332	1.14746	1.37634	1.44245	1.81122	1.57889	1.34865	1.4911	2.71108	1.12851	1.17716	1.23637	2.99019	1.53482	2.14947	1.7185	1.41263	1.35923	1.75354	1.70092	2.39786	1.62111	1.42844		13.4499
		1.419	2.35183	1.2253	329.098	1.21669	1.09349	1.23112	1.03311	1.13188	1.41467	1.41251	1.81764	1.54274	1.43246	1.39416	2.68806	1.07819	1.20764	1.20016	3.01456	1.36821	2.38201	1.65001	1.40832	1.34525	1.70161	1.7599	2.19495	1.62438	1.41488		12.877
		1.4835	2.3362	1.18355	333.756	1.19813	1.0538	1.18127	1.09515	1.06815	1.41562	0	1.75861	1.60979	1.41962	1.19201	2.46823	1.05571	1.15923	1.22302	2.83694	1.30697	2.72152	1.72746	1.46663	1.37244	1.67601	1.74881	2.07579	1.53794	1.47998		12.9698
		1.548	2.37797	1.15742	310.111	0	0	1.149	1.04163	1.0812	0	0	1.72371	1.60515	0	0	2.25513	0	0	1.2571	2.51681	1.33477	2.8277	1.7	1.46828	0	1.67831	0	0	0	0		11.5615
		1.6125	0	0	0	0	0	0	0	0	0	0	0	0	0	0	0	0	0	0	0	0	0	0	0	0	0	0	0	0	0		0

## Sheet: Analysis
BUB-1 corrected signal intensity at cups Signal/Average Noise Values			Descriptive statistics and test
									AVERAGE SIGNAL REDUCTION RELATIVE TO CONTROL
Control	bub-3∆		Sample size, column A	58 (n=29 chromosomes, 2 measurements per chromosome)						Control	bub-3∆
6.02	2.98		Sample size, column B	58 (n=29 chromosomes, 2 measurements per chromosome)					AVERAGE CORRECTED SIGNAL	6.09638	2.63397
6.35	2.66								%	100	43.2054
6.37	2.47		Mean of column A	6.096					% REDUCTION		56.7946
7.83	1.71		Mean of column B	2.634
4.67	2.05		Difference between means (B - A) ± SEM	-3,462 ± 0,1973
7.07	2.56		95% confidence interval	-3,853 to -3,072
6.04	1.74		R squared (eta squared)	0.7299
6.04	1.2
6.85	2.27		Unpaired t test
6.17	2.09		P value	<0,0001
5.61	2.73		P value summary	****
8.56	2.91		Significantly different (P < 0.05)?	Yes
6.83	2.62		One- or two-tailed P value?	Two-tailed
6.05	2.57		t, df	t=17,55, df=114
5.05	3.12
4.46	2.53		F test to compare variances
5.98	2.15		F, DFn, Dfd	5,566, 57, 57
5.9	2.61		P value	<0,0001
5.07	4.19		P value summary	****
4.87	2.88		Significantly different (P < 0.05)?	Yes
3.35	3.25			Control	bub-3∆
5.03	2.77		Number of values	58	58
4.48	2.91
4.79	2.78		Minimum	3	1
4.45	3.44		25% Percentile	5	2
7.18	2.4		Median	6	3
5.82	2.28		75% Percentile	7	3
7.53	2.86		Maximum	9	4
6.57	2.46		Range	6	3
8.18	3.22
7.63	3.04		95% CI of median
6.22	3.57		Actual confidence level	95%	95%
7.79	2.2		Lower confidence limit	6	2
6.92	1.94		Upper confidence limit	6	3
7.59	1.86
5.15	1.66		Mean	6	3
7.19	1.76		Std. Deviation	1	0.6
5.68	1.92		Std. Error of Mean	0.2	0.08
6.65	2.02
6.83	2.95		Lower 95% CI of mean	6	2
5.82	2.63		Upper 95% CI of mean	6	3
9.32	2.41
9.19	2.6		Coefficient of variation	23%	22%
4.95	3.13
5.01	2.31		Geometric mean	6	3
4.38	1.82		Geometric SD factor	1	1
5.14	2.9
4.8	4.1		Lower 95% CI of geo. mean	6	2
6.38	3.47		Upper 95% CI of geo. mean	6	3
4.56	3.09
3.85	3.05		Sum	354	153
4.56	2.91
4.39	2.39
4.52	3.17
8.08	2.76
8.29	2.98
5.95	3.11
7.58	2.61
