# Supplementary material for: Synergistic stabilization of microtubules by BUB-1, HCP-1, and CLS-2 controls microtubule pausing and meiotic spindle assembly
Source: eLife. 2023 Feb 17;12:e82579. doi: 10.7554/eLife.82579 (PMC10005782; doi:10.7554/eLife.82579)
Supplement: Figure 2—figure supplement 1—source data 1. — Embryonic viability assay of hcp-2(ijm6) mutant worms carrying gfp::hcp-1 transgene variants, when endogenous hcp-1 is not depleted. [file elife-82579-fig2-figsupp1-data1.xlsx]

## Sheet: Feuil1
	Treatment	No RNAi								hcp-1(RNAi)
	Strain	JDU302	JDU411	JDU414	JDU447	JDU657	JDU430	JDU760	JDU429	JDU430
Genetic background	gfp::hcp-1 transgene	No transgene	FULL LENGTH	∆1-110	∆111-340 (∆CBD)	∆341-1153	∆1154-1386	∆1311-1386 (KTD)	∆1387-1471	∆1154-1386
hcp-2∆	% Viable	99.3	98.2	99.8	99.5	94.6	97.5	95.5	98.8	1.5
	% Embryonic lethal	0.7	1.8	0.2	0.5	5.4	2.5	4.5	1.2	98.5
	Brood size	1188	1136	1889	1245	1736	813	1104	1430	1917
	n parents	12	11	14	13	15	11	10	11	34
