# Supplementary material for: Synergistic stabilization of microtubules by BUB-1, HCP-1, and CLS-2 controls microtubule pausing and meiotic spindle assembly
Source: eLife. 2023 Feb 17;12:e82579. doi: 10.7554/eLife.82579 (PMC10005782; doi:10.7554/eLife.82579)
Supplement: Figure 2—source data 1. — Embryonic viability assay of hcp-2(ijm6) mutant worms carrying gfp::hcp-1 transgene variants, upon depletion of endogenous hcp-1. [file elife-82579-fig2-data1.xlsx]

## Sheet: Feuil1
	Treatment	hcp-1(RNAi)
	Strain	JDU302	JDU411	JDU414	JDU447	JDU657	JDU760	JDU429
Genetic background	gfp::hcp-1 transgene	No transgene	FULL LENGTH	∆1-110	∆111-340 (∆CBD)	∆341-1153	∆1311-1386 (∆KTD)	∆1387-1471
hcp-2∆	% Viable	2	97.7	99.1	0.6	97.3	0	97
	% Embryonic lethal	98	2.3	0.9	99.4	2.7	100	3
	Brood size	745	1366	888	2836	1148	442	953
	n parents	10	17	9	34	14	5	10
