# Supplementary material for: Synergistic stabilization of microtubules by BUB-1, HCP-1, and CLS-2 controls microtubule pausing and meiotic spindle assembly
Source: eLife. 2023 Feb 17;12:e82579. doi: 10.7554/eLife.82579 (PMC10005782; doi:10.7554/eLife.82579)
Supplement: Figure 3—figure supplement 1—source data 1. — Quantifications of the meiotic defects in indicated conditions. [file elife-82579-fig3-figsupp1-data1.xlsx]

## Sheet: Feuil1
mCherry transgene	knl-1	bub-1
Strain	JDU321	JDU266
Treatment	knl-1(RNAi)	bub-1(RNAi)
total samples (n)	11	11
Non-bipolar spindle	0	0
Absence of segregation	0	0
Abnormal segregation	0	0
1st polar body extrusion failure	0	0
No defect	11	11
