# Supplementary material for: Synergistic stabilization of microtubules by BUB-1, HCP-1, and CLS-2 controls microtubule pausing and meiotic spindle assembly
Source: eLife. 2023 Feb 17;12:e82579. doi: 10.7554/eLife.82579 (PMC10005782; doi:10.7554/eLife.82579)
Supplement: Figure 3—figure supplement 1—source data 2. — Time measurement between anaphase I and anaphase II in indicated conditions (details of statistical tests are provided), and quantifications of meiotic defects observed. [file elife-82579-fig3-figsupp1-data2.xlsx]

## Sheet: Time AI-AII
	Time between Anaphase I and anaphase II onsets (seconds)									Kruskal-Wallis test								Mann Whitney test			Mann Whitney test
	Control	Control_bub-1(RNAi)	Control_mdf-2(RNAi)	Control_bub-1(RNAi)+mdf-2(RNAi)	bub-1∆KD_bub-1(RNAi)	bub-1∆KD_bub-1(RNAi)+mdf-2(RNAi)	hcp-2∆_hcp-1(RNAi)	hcp-2∆_hcp-1(RNAi)+mdf-2(RNAi)		P value	0.0175							Column F	bub-1∆KD_bub-1(RNAi)+mdf-2(RNAi)		Column H	hcp-2∆_hcp-1(RNAi)+mdf-2(RNAi)
	675	1020	945	945	740	780	960	990		Exact or approximate P value?	Approximate							vs.	vs,		vs.	vs,
	870	990	930	975	740	960	1020	870		P value summary	*							Column E	bub-1∆KD_bub-1(RNAi)		Column G	hcp-2∆_hcp-1(RNAi)
	675	705	1020	885	880	870	885	840		Do the medians vary signif. (P < 0.05)?	Yes
	675	795	720	885	660	975	825	855		Number of groups	8
	690	810	900	690	940	915	825	855		Kruskal-Wallis statistic	16.99							P value	0.8591		P value	0.9136
	675	735	810	960	700	795	780	780										Exact or approximate P value?	Exact		Exact or approximate P value?	Exact
	705	840	780	780	1095	765	750	810		Data summary								P value summary	ns		P value summary	ns
	720	855	900	750	1110	885	720	765		Number of treatments (columns)	8							Significantly different (P < 0.05)?	No		Significantly different (P < 0.05)?	No
	705	780	810		840	705		795		Number of values (total)	77							One- or two-tailed P value?	Two-tailed		One- or two-tailed P value?	Two-tailed
	705	825			825	600		735										Sum of ranks in column E,F	135 , 118		Sum of ranks in column G,H	77,50 , 93,50
					825					Number of families	1							Mann-Whitney U	57		Mann-Whitney U	38.5
					735					Number of comparisons per family	7
Descriptive statistics										Alpha	0.05							Difference between medians			Difference between medians
Number of values	10	10	9	8	12	10	8	10										Median of column E	825,0, n=12		Median of column G	825,0, n=8
										Dunn's multiple comparisons test	Mean rank diff,	Significant?	Summary	Adjusted P Value	B-?			Median of column F	832,5, n=10		Median of column H	825,0, n=10
Minimum	675	705	720	690	660	600	720	735		Control vs. Control_bub-1(RNAi)	-28.5	Yes	*	0.0305	C			Difference: Actual	7.5		Difference: Actual	0
25% Percentile	675	769	795	758	736	750	758	776		Control vs. Control_mdf-2(RNAi)	-35.94	Yes	**	0.0033	D			Difference: Hodges-Lehmann	22.5		Difference: Hodges-Lehmann	-15
Median	698	818	900	885	825	833	825	825		Control vs. Column D	-33.86	Yes	**	0.0098	E
75% Percentile	709	889	938	956	925	926	941	859		Control vs. bub-1∆KD_bub-1(RNAi)	-26.47	Yes	*	0.0398	F
Maximum	870	1020	1020	975	1110	975	1020	990		Control vs. Column F	-27.85	Yes	*	0.0373	G
Range	195	315	300	285	450	375	300	255		Control vs. ∆hcp-2_hcp-1(RNAi)	-30.86	Yes	*	0.0252	H
										Control vs. ∆hcp-2_hcp-1(RNAi)+mdf-2(RNAi)	-28.35	Yes	*	0.0319	I
10% Percentile	675	708	720	690	672	611	720	738
90% Percentile	855	1017	1020	975	1106	974	1020	978		Test details	Mean rank 1	Mean rank 2	Mean rank diff,	n1	n2	Z
										Control vs. Control_bub-1(RNAi)	12.95	41.45	-28.5	10	10	2.851
95% CI of median										Control vs. Control_mdf-2(RNAi)	12.95	48.89	-35.94	10	9	3.5
Actual confidence level	98%	98%	96%	99%	96%	98%	99%	98%		Control vs. Column D	12.95	46.81	-33.86	10	8	3.194
Lower confidence limit	675	735	780	690	735	705	720	765		Control vs. bub-1∆KD_bub-1(RNAi)	12.95	39.42	-26.47	10	12	2.766
Upper confidence limit	720	990	945	975	940	960	1020	870		Control vs. Column F	12.95	40.8	-27.85	10	10	2.786
										Control vs. ∆hcp-2_hcp-1(RNAi)	12.95	43.81	-30.86	10	8	2.911
Mean	710	836	868	859	841	825	846	830		Control vs. ∆hcp-2_hcp-1(RNAi)+mdf-2(RNAi)	12.95	41.3	-28.35	10	10	2.836
Std. Deviation	59	101	94	106	146	118	104	71
Std. Error of Mean	19	32	31	38	42	37	37	23
Lower 95% CI of mean	667	764	796	770	748	740	759	778
Upper 95% CI of mean	752	907	941	948	933	910	932	881
Coefficient of variation	8,3%	12%	11%	12%	17%	14%	12%	8,6%
Geometric mean	708	830	864	853	830	817	840	827
Geometric SD factor	1.1	1.1	1.1	1.1	1.2	1.2	1.1	1.1
Lower 95% CI of geo. mean	670	764	794	766	747	733	760	779
Upper 95% CI of geo. mean	747	903	940	949	922	910	929	878
Sum	7095	8355	7815	6870	10090	8250	6765	8295

## Sheet: Meiotic defects
		% observed events
		No defects	Disorganized spindle	Segregation defects	1st PB extrusion failure
	Control	90	0	10	0
	Control_mdf-2(RNAi)	100	0	0	0
	Control_bub-1(RNAi)	10	90	80	20
	Control_bub-1(RNAi)+mdf-2(RNAi)	0	100	75	0
	bub-1∆KD_bub-1(RNAi)	0	100	92	17
	bub-1∆KD_bub-1(RNAi)+mdf-2(RNAi)	0	100	80	10
	hcp-2∆_hcp-1(RNAi)	25	75	75	10
	hcp-2∆_hcp-1(RNAi)+mdf-2(RNAi)	0	100	90	40
		# observed events
		No defects	Disorganized spindle	Segregation defects	1st PB extrusion failure	n oocytes
	Control	9	0	1	0	10
	Control_mdf-2(RNAi)	0	0	0	0	9
	Control_bub-1(RNAi)	1	9	8	2	10
	Control_bub-1(RNAi)+mdf-2(RNAi)	0	8	6	0	8
	bub-1∆KD_bub-1(RNAi)	0	12	11	2	12
	bub-1∆KD_bub-1(RNAi)+mdf-2(RNAi)	0	10	8	1	10
	hcp-2∆_hcp-1(RNAi)	2	6	6	1	8
	hcp-2∆_hcp-1(RNAi)+mdf-2(RNAi)	0	10	9	4	10
