# Supplementary material for: Synergistic stabilization of microtubules by BUB-1, HCP-1, and CLS-2 controls microtubule pausing and meiotic spindle assembly
Source: eLife. 2023 Feb 17;12:e82579. doi: 10.7554/eLife.82579 (PMC10005782; doi:10.7554/eLife.82579)
Supplement: Figure 3—source data 1. — Quantifications of the meiotic defects observed in indicated conditions. [file elife-82579-fig3-data1.xlsx]

## Sheet: Feuil1
mCherry transgene	No transgene			knl-1∆85-505
Strain	JDU233			JDU323
Treatment	No RNAi	knl-1(RNAi)	bub-1(RNAi)	No RNAi	knl-1(RNAi)	gei-17(RNAi)	gei-17(RNAi) bub-RNAi)
total samples (n)	37	22	14	24	21	18	21
Non-bipolar spindle	0	6	10	0	0	0	16
Absence of segregation	0	0	0	0	0	0	2
Abnormal segregation	0	16	9	0	1	0	10
1st polar body extrusion failure	0	2	1	0	1	0	2
No defect	37	6	4	24	18	18	5
