# Supplementary material for: Synergistic stabilization of microtubules by BUB-1, HCP-1, and CLS-2 controls microtubule pausing and meiotic spindle assembly
Source: eLife. 2023 Feb 17;12:e82579. doi: 10.7554/eLife.82579 (PMC10005782; doi:10.7554/eLife.82579)
Supplement: Figure 3—source data 2. — Quantifications of spindle density and spindle size during meiosis I in indicated conditions. Raw quantifications and corrected intensities of GFP::TBA-2α-tubulin signal (GFP Integrated Intensity/Background Noise). Details of statistical analyses are provided. [file elife-82579-fig3-data2.xlsx]

## Sheet: RAW data
movie ID	frame # corresponding to 45 sec before anaphase I onset	GFP::TBA-2(α-tubulin)				Background
		AREA (µm^2)	MEAN	INTDEN	RAWINTDEN	AREA	MEAN	INTDEN	RAWINTDEN		INTDEN SPINDLE/BCKGRND
JDU233_ctrl_30x_4Z_2um_15s_NM_20220329_01 LEFT	2	28.6	3258.3	93078.8	2013603	28.6	1942.4	55489.2	1200416		1.67742
JDU233_ctrl_30x_4Z_2um_15s_NM_20220329_01 RIGHT	9	30.8	4447.1	137113	2966213	30.8	2019.7	62270.4	1347115		2.2019
JDU233_ctrl_30x_4Z_2um_15s_NM_20220329_02	1	28.9	3891.1	112418	2431966	28.6	2004	57342.3	1240504		1.96047
JDU233_ctrl_30x_4Z_2um_15s_NM_20220329_03	22	27	2866.6	77516.4	1676937	27	1827.3	49412.4	1068954		1.56876
JDU233_ctrl_30x_4Z_2um_15s_NM_20220329_05	2	23.3	2715	63253.2	1368377	23.3	1914.1	44593.3	964701		1.41845
JDU233_ctrl_30x_4Z_2um_15s_NM_20220329_06	4	26.2	3142.2	82355.3	1781617	26.2	1872.6	49079.2	1061746		1.67801
JDU233_ctrl_30x_4Z_2um_15s_NM_20220329_07	1	26.3	2751.5	72497.4	1568358	26.1	1838.5	48015.7	1038738		1.50987
JDU233_30X_4Z_2um_15sec_KL_151117_02	7	35.9	3434.3	123347	2668413	35.9	1856.7	66686.8	1442657		1.84965
JDU233_30X_4Z_2um_15sec-KL_151120_02	1	38.3	3236.4	124019	2682939	38.3	1741.1	66721	1443397		1.85877
JDU233_30X_4Z_2um_15sec-KL_151120_05	6	24.8	3734.6	92702.5	2005461	24.8	1912.5	47474.8	1027038		1.95267
JDU233_30X_4Z_2um_15sec-KL_151120_06	2	29.4	2606.1	76618.1	1657504	29.4	1728.5	50737.1	1097612		1.5101
JDU233_30X_4Z_2um_15sec-KL_151120_07	2	32.6	2671.3	87054.7	1883281	32.6	1610.8	52493.3	1135603		1.6584
JDU233_30X_4Z_2um_15sec-KL_151123_01	6	24.6	4034.1	99390.8	2150151	24.6	1871.4	46108.5	997479		2.15559
JDU233_R75_30x_4Z_2um_15s_20210319-03	16	25.3	3791.8	95876.9	2074135	25.3	2415.2	61067.4	1321090		1.57002
JDU233_R75_30x_4Z_2um_15s_190521_02	12	26.3	4101.1	108058	2337644	26.2	2191.2	57431	1242422		1.88152
JDU233_R75_30x_4Z_2um_15s_190521_03	14	15.2	3754.4	56923.2	1231437	15.2	2165.9	32838.7	710409		1.73342
JDU233_R75_30x_4Z_2um_15s_190521_04	3	15.8	4512.2	71333.7	1543185	15.7	2586.5	40530.4	876808		1.76
JDU233_R75_30x_4Z_2um_15s_190521_06	2	20.2	3453.5	69761.8	1509178	20.2	2312	46704	1010363		1.4937
JDU233_R75_30x_4Z_2um_15s_190521_07	1	21.6	2926.8	63181.1	1366817	21.6	2188.7	47246.9	1022107		1.33725
JDU233_R75_4Z_2um_20sec_60X_KL_161229_02	14	17.6	1588.2	27880	2412548	17.6	1380.8	24238.2	2097412		1.15025
JDU233_R75_4Z_2um_20sec_60X_KL_161229_04	3	33.9	1686.9	57178.1	4947807	33.9	1443.3	48920	4233204		1.16881
JDU233_R75_4Z_2um_20sec_60X_KL_161229_06	3	10.4	1910.8	19961.8	1727360	10.4	1504.5	15717.5	1360085		1.27004
JDU233_R75_4Z_2um_20sec_60X_KL_161229_07	5	27.7	1613	44698.7	3867923	27.7	1470.8	40758.8	3526996		1.09666
JDU233_R75_4Z_2um_20sec_60X_KL_161229_08 TOP	6	20.3	1671.6	33901.2	2933583	20.3	1482.1	30059.2	2601121		1.12781
JDU233_R75_4Z_2um_20sec_60X_KL_161229_08 BOTTOM	12	14.2	1713	24309.1	2103549	14.2	1466.4	20809.9	1800746		1.16815
JDU233_R75_4Z_2um_20sec_60X_KL_161229_09	4	25.9	1761.6	45539.9	3940718	25.9	1407.7	36391.8	3149103		1.25138
JDU233_R75_4Z_2um_20sec_60X_KL_161229_10	2	23.8	1999.8	47629.4	4121524	23.8	1275.3	30375.5	2628491		1.56802
JDU233_R75_4Z_2um_20sec_60X_KL_161229_12	1	20.5	1826	37497.8	3244804	20.5	1437.9	29528.5	2555201		1.26989
JDU233_R78_30x_4Z_2um_15s_06052021_01	46	20.2	2834.1	57380.1	1241321	20.2	2244.3	45439.8	983013		1.26277
JDU233_R78_30x_4Z_2um_15s_06052021_03 TOP	11	12.5	3312.7	41498.4	897747	12.5	2452.3	30719.7	664568		1.35087
JDU233_R78_30x_4Z_2um_15s_06052021_03 BOTTOM	7	20.2	3215.2	64799.6	1401830	20.2	2482.3	50028	1082271		1.29527
JDU233_R78_30x_4Z_2um_15s_06052021_06	2	18	2653.3	47833.4	1034795	18	2291.7	41314.6	893771		1.15778
SUM_JDU233_R78_4Z_2um_15sec_30X_KL_170510_02 RIGHT	10	16.2	3331.2	54047.9	1169235	16.2	2466.5	40019.1	865746		1.35055
SUM_JDU233_R78_4Z_2um_15sec_30X_KL_170510_02 LEFT	2	12.4	2803.2	34726.6	751251	12.2	2458.8	29891.6	646655		1.16175
SUM_JDU233_R78_4Z_2um_15sec_30X_KL_170510_03	13	22	2660.3	58534.2	1266289	22	2193.4	48260.8	1044041		1.21287
SUM_JDU233_R78_4Z_2um_15sec_30X_KL_170510_04	2	19.6	2836.7	55728.1	1205584	19.6	2130.6	41856.8	905502		1.3314
SUM_JDU233_R78_4Z_2um_15sec_30X_KL_170510_05 LEFT	1	15.3	3046.7	46756.9	1011507	15.3	2212.8	33959.3	734653		1.37685
SUM_JDU233_R78_4Z_2um_15sec_30X_KL_170510_05 RIGHT	1	21	2796.2	58681.5	1269476	21	2027.2	42544	920368		1.37931
JDU233_R78_30x_4Z_2um_15s_NM_20220511_01	2	20.5	2737.8	56190.6	1215589	20.5	2020.1	41461	896939		1.35526
JDU323_ctrl_30x_4Z_2um_15s_NM_20220603_02	15	28.1	5683.6	159474	3449962	28.1	1980.2	55562.2	1201994		2.8702
JDU323_ctrl_30x_4Z_2um_15s_NM_20220603_04	7	33.8	5450.4	184172	3984257	33.8	1904	64337.4	1391831		2.8626
JDU323_ctrl_30x_4Z_2um_15s_NM_20220603_07	3	21.6	5078.8	109872	2376901	21.6	2032.1	43961.7	951036		2.49927
JDU323_ctrl_30x_4Z_2um_15s_NM_20220603_08	7	29.8	4015	119522	2585653	29.8	1819.2	54156.1	1171576		2.20699
JDU323_ctrl_30x_4Z_2um_15s_NM_20220603_09	12	27.4	4063.5	111199	2405611	27.4	1760.8	48183.8	1042375		2.30782
JDU323_ctrl_30x_4Z_2um_15s_NM_20220603_10	1	25.8	4728.4	122180	2643151	25.8	1925.1	49743.2	1076109		2.45621
JDU323_ctrl_30x_4Z_2um_15s_NM_20220607_02	10	28.5	3001.4	85601.7	1851847	28.5	1721.8	49107.7	1062362		1.74314
JDU323_ctrl_30x_4Z_2um_15s_NM_20220607_04	4	23.9	3643	87060.5	1883406	23.9	1776.1	42444.7	918220		2.05115
JDU323_ctrl_30x_4Z_2um_15s_NM_20220607_05	16	32.4	3067.2	99532.1	2153208	32.4	1692.8	54930.2	1188322		1.81197
JDU323_R75_30x_4Z_2um_15s_20210319-07	12	16.8	3247	54633.7	1181907	16.8	2047	34442.1	745097		1.58625
JDU323_R75_30x_4Z_2um_15s_20210319-09	10	14.7	1940.1	28608.5	618897	14.6	1182.1	17267.6	373555		1.65677
JDU323_R75_30x_4Z_2um_15s_22042021_03	5	26.7	1697.2	45347.1	981008	26.7	1188.2	31745.9	686769		1.42844
JDU323_R75_4Z_2um_20sec_30X_KL_170323_03	23	22.7	4133.6	93818.2	2029598	22.5	2191.4	49331.3	1067199		1.9018
JDU323_R75_4Z_2um_20sec_30X_KL_170405_01	6	19.8	1965.9	38916.3	3367552	19.8	1440.3	28511.5	2467193		1.36493
JDU323_R75_4Z_2um_20sec_30X_KL_170928_03	9	23.9	3178.2	75952.9	1643113	23.9	1918.1	45838.5	991638		1.65697
JDU323_R75_4Z_2um_20sec_30X_KL_170928_05	4	19.8	3434.9	67956.8	1470130	19.8	1725.8	34143.1	738629		1.99035
JDU323_R75_30x_4Z_2um_15s_NM_20220511_01	5	27.6	3314.6	91318.1	1975512	27.6	1848.4	50922.7	1101626		1.79327
JDU323_R75_30x_4Z_2um_15s_NM_20220511_03	5	22.4	5232.4	117306	2537711	22.4	2039.4	45721.9	989117		2.56563
JDU323_R75_30x_4Z_2um_15s_NM_20220511_04	1	21.3	3490.9	74229.6	1605832	21.3	1782.3	37898.3	819866		1.95865
SUM_JDU323_R113_30x_4Z_2um_15s_NM_20220112_01	2	30.4	4798.9	145741	3152858	30.4	2083.6	63278.9	1368932		2.30315
SUM_JDU323_R113_30x_4Z_2um_15s_NM_20220112_02	2	27.7	3940.2	109282	2364131	27.7	1895.6	52573.5	1137339		2.07865
SUM_JDU323_R113_30x_4Z_2um_15s_NM_20220112_03	3	24	5698.4	136972	2963165	24	2048.9	49250.2	1065444		2.78115
SUM_JDU323_R113_30x_4Z_2um_15s_NM_20220112_06	1	26.7	4757.1	126879	2744819	26.7	1891.3	50445.5	1091302		2.51518
SUM_JDU323_R113_30x_4Z_2um_15s_NM_20220112_11	8	28.1	3705.1	103961	2249024	28.1	1766.5	49566.8	1072294		2.0974
JDU323_R113_30x_4Z_2um_15s_NM_20220512_01	5	30	4539.9	135988	2941865	29.9	1823.2	54527	1179599		2.49395
JDU323_R113_30x_4Z_2um_15s_NM_20220512_02 BOTTOM		24.6	1608.1	39620.2	857115	24.6	1181	29098.6	629499		1.36158
JDU323_R113_30x_4Z_2um_15s_NM_20220512_03		27.2	3647.5	99309.6	2148395	27.2	1765.8	48077.6	1040078		2.06561
JDU323_R113_30x_4Z_2um_15s_NM_20220512_05	1	22.7	2989.6	67992.2	1470896	22.7	1712.7	38952.2	842664		1.74553
JDU323_R75_R113_30x_4Z_2um_15s_NM_20211215_03	4	9.5	4955.9	46962.9	1015963	9.5	2327	22050.5	477025		2.12979
JDU323_R75_R113_30x_4Z_2um_15s_NM_20211215_06	2	23.9	4176.8	99819.5	2159427	23.2	2003.1	46389.4	1003556		2.15177
JDU323_R75_R113_30x_4Z_2um_15s_NM_20211215_09	10	16.7	4783.5	80045.3	1731645	16.7	2104.3	35212.9	761772		2.27318
JDU323_R75_R113l_30x_4Z_2um_15s_NM_20220112_01	12	22.2	3854.7	85528.1	1850256	22.2	1918.2	42560.8	920731		2.00955
JDU323_R75_R113l_30x_4Z_2um_15s_NM_20220112_03	1	13	3240	42235.3	913689	13	1937.4	25255.2	546353		1.67234
JDU323_R75_R113l_30x_4Z_2um_15s_NM_20220112_05	6	25.3	2744.2	69386.4	1501057	25.3	1772.5	44818.7	969577		1.54816
JDU323_R75_R113l_30x_4Z_2um_15s_NM_20220112_07	2	25.2	4513.2	113699	2459695	25.2	1864.2	46964.2	1015991		2.42098
JDU323_R75_R113l_30x_4Z_2um_15s_NM_20220112_08	6	25.5	2381.5	60657.1	1312214	25.5	1766.9	45003.4	973572		1.34783
JDU323_R75_R113_30x_4Z_2um_15s_NM_20220119_06	1	13.5	2911.6	39299.6	850181	13.2	1934	25568.3	553126		1.53704
JDU323_R75_R113_30x_4Z_2um_15s_NM_20220119_09	4	15.4	3632.6	56084.3	1213289	15.3	2112.5	32322.7	699248		1.73514
JDU323_R75_R113_30x_4Z_2um_15s_NM_20220126_02	15	22.7	2678.1	60659.7	1312270	22.7	1761.3	39894.6	863052		1.5205
JDU323_R75_R113_30x_4Z_2um_15s_NM_20220126_05	1	17.6	3020.3	53193	1150741	17.6	1930.5	33999.8	735528		1.56451

## Sheet: Figure 3B_Microtubule density
Dataset of Figure 3B: Microtubule density (GFP signal/Noise)(a.u.)
Group	Group 1 : No transgene			Group 2 : KNL-1∆85-505::mCherry
Condition	No RNAi	knl-1(RNAi)	bub-1(RNAi)	No RNAi	knl-1(RNAi)	gei-17(RNAi)	knl-1(RNAi- gei-17(RNAi)		Descriptive statistics for Group 1										Descriptive statistics for Group 2
Sample	JDU233_CTRL	JDU233_R75	JDU233_R78	JDU323_CTRL	JDU323_R75	JDU323_R113	JDU323_R75_R113		Number of families	1									Number of families	1
	1.67742	1.57002	1.26277	2.8702	1.58625	2.30315	2.12979		Number of comparisons per family	3									Number of comparisons per family	6
	2.2019	1.88152	1.35087	2.8626	1.65677	2.07865	2.15177		Alpha	0.05									Alpha	0.05
	1.96047	1.73342	1.29527	2.49927	1.42844	2.78115	2.27318
	1.56876	1.76	1.15778	2.20699	1.9018	2.51518	2.00955		Tukey's multiple comparisons test	Mean Diff,	95,00% CI of diff,	Significant?	Summary	Adjusted P Value					Tukey's multiple comparisons test	Mean Diff,	95,00% CI of diff,	Significant?	Summary	Adjusted P Value
	1.41845	1.4937	1.35055	2.30782	1.36493	2.0974	1.67234		JDU233_CTRL vs. JDU233_R75	0.3794	0,1752 to 0,5836	Yes	***	0.0002	A-B				JDU323_CTRL vs. JDU323_R75	0.5218	0,04991 to 0,9938	Yes	*	0.0254	D-E
	1.67801	1.33725	1.16175	2.45621	1.65697	2.49395	1.54816		JDU233_CTRL vs. JDU233_R78	0.4752	0,2544 to 0,6959	Yes	****	<0,0001	A-C				JDU323_CTRL vs. JDU323_R113	0.1519	-0,3323 to 0,6361	No	ns	0.8326	D-F
	1.50987	1.15025	1.21287	1.74314	1.99035	1.36158	2.42098		JDU233_R75 vs. JDU233_R78	0.09573	-0,1182 to 0,3096	No	ns	0.524	B-C				JDU323_CTRL vs. JDU323_R75_R113	0.4863	0,03333 to 0,9392	Yes	*	0.0314	D-G
	1.84965	1.16881	1.3314	2.05115	1.79327	2.06561	1.34783												JDU323_R75 vs. JDU323_R113	-0.3699	-0,8419 to 0,1020	No	ns	0.1689	E-F
	1.85877	1.27004	1.37685	1.81197	2.56563	1.74553	1.53704		Test details	Mean 1	Mean 2	Mean Diff,	SE of diff,	n1	n2	q	DF		JDU323_R75 vs. JDU323_R75_R113	-0.03559	-0,4754 to 0,4042	No	ns	0.9963	E-G
	1.95267	1.09666	1.37931		1.95865		1.73514		JDU233_CTRL vs. JDU233_R75	1.769	1.39	0.3794	0.08354	13	15	6.423	36		JDU323_R113 vs. JDU323_R75_R113	0.3343	-0,1186 to 0,7873	No	ns	0.2113	F-G
	1.5101	1.12781	1.35526				1.5205		JDU233_CTRL vs. JDU233_R78	1.769	1.294	0.4752	0.09032	13	11	7.44	36
	1.6584	1.16815					1.56451		JDU233_R75 vs. JDU233_R78	1.39	1.294	0.09573	0.08751	15	11	1.547	36		Test details	Mean 1	Mean 2	Mean Diff,	SE of diff,	n1	n2	q	DF
	2.15559	1.25138																	JDU323_CTRL vs. JDU323_R75	2.312	1.79	0.5218	0.1752	9	10	4.212	36
		1.56802							Kruskal-Wallis test										JDU323_CTRL vs. JDU323_R113	2.312	2.16	0.1519	0.1798	9	9	1.195	36
		1.26989							P value	0.0002									JDU323_CTRL vs. JDU323_R75_R113	2.312	1.826	0.4863	0.1682	9	12	4.089	36
Test for normal distribution									Exact or approximate P value?	Approximate									JDU323_R75 vs. JDU323_R113	1.79	2.16	-0.3699	0.1752	10	9	2.986	36
Anderson-Darling test									P value summary	***									JDU323_R75 vs. JDU323_R75_R113	1.79	1.826	-0.03559	0.1633	10	12	0.3083	36
A2*	0.3044	0.6474	0.6282	0.2122	0.3595	0.2321	0.5136		Do the medians vary signif. (P < 0.05)?	Yes									JDU323_R113 vs. JDU323_R75_R113	2.16	1.826	0.3343	0.1682	9	12	2.812	36
P value	0.5211	0.0732	0.0746	0.7899	0.3734	0.7184	0.1534		Number of groups	4
Passed normality test (alpha=0.05)?	Yes	Yes	Yes	Yes	Yes	Yes	Yes		Kruskal-Wallis statistic	19.91									ANOVA summary
P value summary	ns	ns	ns	ns	ns	ns	ns												F	4.38
									Data summary										P value	0.01
D'Agostino & Pearson test									Number of treatments (columns)	4									P value summary	**
K2	1.023	2.227	2.017	0.5176	4.992	0.7158	2.262		Number of values (total)	41									Significant diff. among means (P < 0.05)?	Yes
P value	0.5996	0.3284	0.3647	0.772	0.0824	0.6991	0.3227												R squared	0.2674
Passed normality test (alpha=0.05)?	Yes	Yes	Yes	Yes	Yes	Yes	Yes
P value summary	ns	ns	ns	ns	ns	ns	ns												Brown-Forsythe test
																			F (DFn, DFd)	0,1678 (3, 36)
Shapiro-Wilk test																			P value	0.9174
W	0.9435	0.8928	0.8589	0.9423	0.9134	0.9639	0.9121												P value summary	ns
P value	0.5043	0.074	0.0558	0.6061	0.305	0.8385	0.2268												Are SDs significantly different (P < 0.05)?	No
Passed normality test (alpha=0.05)?	Yes	Yes	Yes	Yes	Yes	Yes	Yes
P value summary	ns	ns	ns	ns	ns	ns	ns												Bartlett's test
																			Bartlett's statistic (corrected)	0.5789
Kolmogorov-Smirnov test																			P value	0.9012
KS distance	0.1811	0.212	0.2185	0.1343	0.181	0.1905	0.1873												P value summary	ns
P value	>0,1000	0.0682	>0,1000	>0,1000	>0,1000	>0,1000	>0,1000												Are SDs significantly different (P < 0.05)?	No
Passed normality test (alpha=0.05)?	Yes	Yes	Yes	Yes	Yes	Yes	Yes
P value summary	ns	ns	ns	ns	ns	ns	ns												ANOVA table	SS	DF	MS	F (DFn, DFd)	P value
																			Treatment (between columns)	1.911	3	0.6371	F (3, 36) = 4,380	P=0,0100
Number of values	13	15	11	9	10	9	12												Residual (within columns)	5.236	36	0.1454
																			Total	7.147	39
Descriptive statistics																			Data summary
Minimum	1	1	1	2	1	1	1												Number of treatments (columns)	4
25% Percentile	2	1	1	2	2	2	2												Number of values (total)	40
Median	2	1	1	2	2	2	2
75% Percentile	2	2	1	3	2	3	2
Maximum	2	2	1	3	3	3	2
Range	0.8	0.8	0.2	1	1	1	1
95% CI of median
Actual confidence level	98%	96%	99%	96%	98%	96%	96%
Lower confidence limit	2	1	1	2	1	2	2
Upper confidence limit	2	2	1	3	2	3	2
Mean	2	1	1	2	2	2	2
Std. Deviation	0.2	0.3	0.08	0.4	0.3	0.4	0.4
Std. Error of Mean	0.07	0.07	0.03	0.1	0.1	0.1	0.1
Lower 95% CI of mean	2	1	1	2	2	2	2
Upper 95% CI of mean	2	2	1	3	2	2	2
Coefficient of variation	14%	19%	6%	18%	19%	20%	19%
Geometric mean	2	1	1	2	2	2	2
Geometric SD factor	1	1	1	1	1	1	1
Lower 95% CI of geo. mean	2	1	1	2	2	2	2
Upper 95% CI of geo. mean	2	2	1	3	2	3	2
Sum	23	21	14	21	18	19	22

## Sheet: Figure 3B_Spindle area
Dataset of Figure 3B: Spindle area (µm2)
Group	Group 1 : No transgene			Group 2 : KNL-1∆85-505::mCherry
Condition	No RNAi	knl-1(RNAi)	bub-1(RNAi)	No RNAi	knl-1(RNAi)	gei-17(RNAi)	knl-1(RNAi- gei-17(RNAi)		Descriptive statistics for Group 1										Descriptive statistics for Group 2
Sample	JDU233_CTRL	JDU233_R75	JDU233_R78	JDU323_CTRL	JDU323_R75	JDU323_R113	JDU323_R75_R113		Number of families	1									Number of families	1
	28.6	25.3	20.2	28.1	16.8	30.4	9.5		Number of comparisons per family	3									Number of comparisons per family	6
	30.8	26.3	12.5	33.8	14.7	27.7	23.9		Alpha	0.05									Alpha	0.05
	28.9	15.2	20.2	21.6	26.7	24	16.7
	27	15.8	18	29.8	22.7	26.7	22.2		Tukey's multiple comparisons test	Mean Diff,	95,00% CI of diff,	Significant?	Summary	Adjusted P Value					Tukey's multiple comparisons test	Mean Diff,	95,00% CI of diff,	Significant?	Summary	Adjusted P Value
	23.3	20.2	16.2	27.4	19.8	28.1	13		JDU233_CTRL vs. JDU233_R75	7.73	3,161 to 12,30	Yes	***	0.0006	A-B				JDU323_CTRL vs. JDU323_R75	6.55	1,437 to 11,66	Yes	**	0.0075	D-E
	26.2	21.6	12.4	25.8	23.9	29.9	25.3		JDU233_CTRL vs. JDU233_R78	10.99	6,046 to 15,93	Yes	****	<0,0001	A-C				JDU323_CTRL vs. JDU323_R113	1.309	-3,944 to 6,562	No	ns	0.9077	D-F
	26.3	17.6	22	29.9	19.8	24.6	25.2		JDU233_R75 vs. JDU233_R78	3.256	-1,531 to 8,043	No	ns	0.2334	B-C				JDU323_CTRL vs. JDU323_R75_R113	8.912	4,016 to 13,81	Yes	***	0.0001	D-G
	35.9	33.9	19.6	28.5	27.6	27.2	25.5												JDU323_R75 vs. JDU323_R113	-5.241	-10,49 to 0,01216	No	ns	0.0507	E-F
	38.3	10.4	15.3	23.9	22.4	22.7	13.5		Test details	Mean 1	Mean 2	Mean Diff,	SE of diff,	n1	n2	q	DF		JDU323_R75 vs. JDU323_R75_R113	2.362	-2,534 to 7,257	No	ns	0.5702	E-G
	24.8	27.7	21	32.4	21.3		15.4		JDU233_CTRL vs. JDU233_R75	28.98	21.25	7.73	1.87	13	15	5.848	36		JDU323_R113 vs. JDU323_R75_R113	7.603	2,561 to 12,64	Yes	**	0.0014	F-G
	29.4	20.3	20.5				22.7		JDU233_CTRL vs. JDU233_R78	28.98	17.99	10.99	2.021	13	11	7.687	36
	32.6	14.2					17.6		JDU233_R75 vs. JDU233_R78	21.25	17.99	3.256	1.958	15	11	2.351	36		Test details	Mean 1	Mean 2	Mean Diff,	SE of diff,	n1	n2	q	DF
	24.6	25.9																	JDU323_CTRL vs. JDU323_R75	28.12	21.57	6.55	1.901	10	10	4.873	37
		23.8							ANOVA summary										JDU323_CTRL vs. JDU323_R113	28.12	26.81	1.309	1.953	10	9	0.9478	37
		20.5							F	16.15									JDU323_CTRL vs. JDU323_R75_R113	28.12	19.21	8.912	1.82	10	12	6.925	37
Test for normal distribution									P value	<0,0001									JDU323_R75 vs. JDU323_R113	21.57	26.81	-5.241	1.953	10	9	3.795	37
Anderson-Darling test									P value summary	****									JDU323_R75 vs. JDU323_R75_R113	21.57	19.21	2.362	1.82	10	12	1.835	37
A2*	0.3756	0.1653	0.5594	0.1493	0.1646	0.2138	0.4729		Significant diff. among means (P < 0.05)?	Yes									JDU323_R113 vs. JDU323_R75_R113	26.81	19.21	7.603	1.874	9	12	5.736	37
P value	0.3581	0.9245	0.1142	0.9433	0.9152	0.7845	0.1973		R squared	0.4729
Passed normality test (alpha=0.05)?	Yes	Yes	Yes	Yes	Yes	Yes	Yes												ANOVA summary
P value summary	ns	ns	ns	ns	ns	ns	ns		Brown-Forsythe test										F	10.51
									F (DFn, DFd)	1,446 (2, 36)									P value	<0,0001
D'Agostino & Pearson test									P value	0.2489									P value summary	****
K2	2.316	0.1794	1.725	0.1509	0.06995	0.5096	2.267		P value summary	ns									Significant diff. among means (P < 0.05)?	Yes
P value	0.3141	0.9142	0.4221	0.9273	0.9656	0.7751	0.3219		Are SDs significantly different (P < 0.05)?	No									R squared	0.4601
Passed normality test (alpha=0.05)?	Yes	Yes	Yes	Yes	Yes	Yes	Yes
P value summary	ns	ns	ns	ns	ns	ns	ns		Bartlett's test										Brown-Forsythe test
									Bartlett's statistic (corrected)	3.743									F (DFn, DFd)	3,471 (3, 37)
Shapiro-Wilk test									P value	0.1539									P value	0.0256
W	0.9286	0.9837	0.8815	0.9816	0.9735	0.9564	0.903		P value summary	ns									P value summary	*
P value	0.3263	0.9887	0.1087	0.9731	0.9215	0.7595	0.1736		Are SDs significantly different (P < 0.05)?	No									Are SDs significantly different (P < 0.05)?	Yes
Passed normality test (alpha=0.05)?	Yes	Yes	Yes	Yes	Yes	Yes	Yes
P value summary	ns	ns	ns	ns	ns	ns	ns		ANOVA table	SS	DF	MS	F (DFn, DFd)	P value					Bartlett's test
									Treatment (between columns)	786.2	2	393.1	F (2, 36) = 16,15	P<0,0001					Bartlett's statistic (corrected)	4.958
Kolmogorov-Smirnov test									Residual (within columns)	876.3	36	24.34							P value	0.1749
KS distance	0.1546	0.09858	0.2274	0.1228	0.1304	0.1497	0.2035		Total	1662	38								P value summary	ns
P value	>0,1000	>0,1000	>0,1000	>0,1000	>0,1000	>0,1000	>0,1000												Are SDs significantly different (P < 0.05)?	No
Passed normality test (alpha=0.05)?	Yes	Yes	Yes	Yes	Yes	Yes	Yes		Data summary
P value summary	ns	ns	ns	ns	ns	ns	ns		Number of treatments (columns)	3									ANOVA table	SS	DF	MS	F (DFn, DFd)	P value
									Number of values (total)	39									Treatment (between columns)	569.7	3	189.9	F (3, 37) = 10,51	P<0,0001
Number of values	13	15	11	10	10	9	12												Residual (within columns)	668.5	37	18.07
																			Total	1238	40
Descriptive statistics
Minimum	23	10	12	22	15	23	10												Data summary
25% Percentile	26	16	15	25	19	24	14												Number of treatments (columns)	4
Median	29	21	20	28	22	27	20												Number of values (total)	41
75% Percentile	32	26	21	31	25	29	25
Maximum	38	34	22	34	28	30	26
Range	15	24	10	12	13	8	16
95% CI of median
Actual confidence level	98%	96%	99%	98%	98%	96%	96%
Lower confidence limit	25	16	13	24	17	24	14
Upper confidence limit	33	26	21	32	27	30	25
Mean	29	21	18	28	22	27	19
Std. Deviation	4	6	3	4	4	3	6
Std. Error of Mean	1	2	1	1	1	0.9	2
Lower 95% CI of mean	26	18	16	25	19	25	16
Upper 95% CI of mean	32	25	20	31	24	29	23
Coefficient of variation	15%	29%	19%	13%	19%	10%	29%
Geometric mean	29	20	18	28	21	27	18
Geometric SD factor	1	1	1	1	1	1	1
Lower 95% CI of geo. mean	26	17	15	25	18	25	15
Upper 95% CI of geo. mean	31	24	20	31	24	29	23
Sum	377	319	198	281	216	241	231
