# Supplementary material for: Synergistic stabilization of microtubules by BUB-1, HCP-1, and CLS-2 controls microtubule pausing and meiotic spindle assembly
Source: eLife. 2023 Feb 17;12:e82579. doi: 10.7554/eLife.82579 (PMC10005782; doi:10.7554/eLife.82579)
Supplement: Figure 4—figure supplement 1—source data 1. — Quantifications of the meiotic defects in bub-1∆KD::mCherry transgenic worms. [file elife-82579-fig4-figsupp1-data1.xlsx]

## Sheet: Feuil1
transgene	BUB-1(∆KD)::mCherry
Strain	JDU527
Treatment	No RNAi
total samples (n)	10
Non-bipolar spindle	0
Absence of segregation	0
Abnormal segregation	0
1st polar body extrusion failure	0
No defect	10
