# Supplementary material for: Synergistic stabilization of microtubules by BUB-1, HCP-1, and CLS-2 controls microtubule pausing and meiotic spindle assembly
Source: eLife. 2023 Feb 17;12:e82579. doi: 10.7554/eLife.82579 (PMC10005782; doi:10.7554/eLife.82579)
Supplement: Figure 4—figure supplement 1—source data 2. — Quantifications of the meiotic defects observed in hcp-2(ijm6) mutant, cls-2∆CTD::gfp::hcp-111541154-1386 transgenic worms upon depletion of cls-2 or both hcp-1 and cls-2. [file elife-82579-fig4-figsupp1-data2.xlsx]

## Sheet: Feuil1
transgene	CLS-2(∆CTD)::GFP::HCP-1(1154-1386)
Strain	JDU720
Treatment	No RNAi	cls-2(RNAi)	cls-2(RNAi) hcp-1(RNAi)
total samples (n)	10	12	9
Non-bipolar spindle	0	3	7
Absence of segregation	0	0	0
Abnormal segregation	0	0	1
1st polar body extrusion failure	0	4	4
No defect	10	7	2
