# Supplementary material for: Synergistic stabilization of microtubules by BUB-1, HCP-1, and CLS-2 controls microtubule pausing and meiotic spindle assembly
Source: eLife. 2023 Feb 17;12:e82579. doi: 10.7554/eLife.82579 (PMC10005782; doi:10.7554/eLife.82579)
Supplement: Figure 4—source data 1. — Quantifications of the meiotic defects observed in indicated conditions. [file elife-82579-fig4-data1.xlsx]

## Sheet: Feuil1
transgene	bub-1(∆KD)::mCherry	No transgene	gfp::hcp-1(FL)	gfp::hcp-1(∆CBD)	gfp::hcp-1(∆KTD)
Strain	JDU527	JDU605	JDU631	JDU633	JDU763
Treatment	bub-1(RNAi)	hcp-1(RNAi)	hcp-1(RNAi)	hcp-1(RNAi)	hcp-1(RNAi)
total samples (n)	13	10	9	10	8
Non-bipolar spindle	11	8	0	9	8
Absence of segregation	1	2	0	0	0
Abnormal segregation	12	5	0	5	7
1st polar body extrusion failure	1	3	0	0	2
No defect	0	2	9	1	0
