# Supplementary material for: Synergistic stabilization of microtubules by BUB-1, HCP-1, and CLS-2 controls microtubule pausing and meiotic spindle assembly
Source: eLife. 2023 Feb 17;12:e82579. doi: 10.7554/eLife.82579 (PMC10005782; doi:10.7554/eLife.82579)
Supplement: Figure 4—source data 2. — Quantifications of spindle density and spindle size during meiosis I in indicated hcp-2(ijm6) mutants upon depletion of endogenous hcp-1. Raw quantifications and corrected intensities of GFP::TBA-2α-tubulin signal (GFP Integrated Intensity/Background Noise). Details of statistical analyses are provided. [file elife-82579-fig4-data2.xlsx]

## Sheet: RAW data
movie ID	frame # corresponding to 45 sec before anaphase I onset	GFP::TBA-2(α-tubulin)				Background
		AREA (µm^2)	MEAN	INTDEN	RAWINTDEN	AREA	MEAN	INTDEN	RAWINTDEN		INTDEN SPINDLE/BCKGRND
JDU605_R76_30x_4Z_2um_15s_20210623_02	1	27.7	3068.7	85111.6	1841245	27.7	2426	67286.4	1455627		1.26492
JDU605_R76_30x_4Z_2um_15s_20210623_06	12	21.3	2842.9	60580.8	1310563	21.3	2159.8	46023.8	995648		1.31629
JDU605_R76_30x_4Z_2um_15s_20210623_07	1	15.1	2985.1	44983.2	973136	15.1	2405.1	36243.6	784069		1.24113
JDU605_R76_30x_4Z_2um_15s_20210623_08	13	17	3215.9	54555.7	1180220	17	2331.1	39545.9	855509		1.37955
JDU605_R76_30x_4Z_2um_15s_20210623_10	3	16.4	2740.2	44966	972763	16.4	2256.4	37027.5	801028		1.21439
JDU605_R76_30x_4Z_2um_15s_20210624_02	1	16.7	2709.4	45212.6	978098	16.7	2481.1	41403.3	895691		1.092
JDU605_R76_30x_4Z_2um_15s_20210624_03	4	25.5	3837.8	97748.6	2114625	25.5	2628.5	66948.9	1448327		1.46005
JDU605_R76_30x_4Z_2um_15s_20210624_04 TOP	1	15.7	3021.6	47348.9	1024314	15.7	2597.3	40700.8	880493		1.16334
JDU605_R76_30x_4Z_2um_15s_20210624_07	1	22.8	4893.3	111739	2417291	22.8	3230.2	73612.4	1592479		1.51794
JDU631_76_30x_4Z_2um_15s-24032021-02	2	27.7	6998.7	193785	4192206	27.5	2396.2	65793.2	1423325		2.94536
JDU631_76_30x_4Z_2um_15s-24032021-04	2	26.7	7766.6	207148	4481305	26.7	2514.3	67061.3	1450757		3.08894
JDU631_76_30x_4Z_2um_15s-24032021-07	3	20.8	5387.4	112064	2424308	20.8	2388.8	49690.6	1074971		2.25523
JDU631_76_30x_4Z_2um_15s-24032021-08	1	27.4	4743.9	130038	2813157	27.4	2124.9	58246.9	1260073		2.23253
JDU631_R76_30x_4Z_2um_15s_22042021_05	1	28.3	6160.8	174288	3770422	28.3	2507.3	70931.1	1534474		2.45714
JDU631_R76_30x_4Z_2um_15s_22042021_06	1	20.3	5165.2	104817	2267540	20.3	2885.2	58548.1	1266588		1.79027
JDU631_R76_30x_4Z_2um_15s_22042021_07	4	29.1	3244.3	94480.7	2043929	29.1	2126.1	61916.5	1339459		1.52594
JDU633_76_30x_4Z_2um_15s_08	2	24.6	5072	124729	2698304	24.6	2409.3	59249.1	1281755		2.10516
JDU633_76_30x_4Z_2um_15s_12	5	21.4	3729.5	79991.2	1730475	21.4	2194.5	47068	1018237		1.69948
JDU633_76_30x_4Z_2um_15s_16	1	15.7	7677.4	120307	2602643	15.7	2571	40288.7	871577		2.98613
JDU633_R76_30x_4Z_2um_15s_05052021_03 BOTTOM	1	25.2	3354.8	84515.7	1828354	25.2	2069.8	52142.5	1128014		1.62086
JDU633_R76_30x_4Z_2um_15s_05052021_03 TOP	8	33.1	4017.9	132982	2876833	33.1	2220.9	73505.6	1590170		1.80914
JDU633_R76_30x_4Z_2um_15s_05052021_04	3	26.3	4401.1	115554	2499812	26.3	2371.9	62276.3	1347242		1.8555
JDU633_R76_30x_4Z_2um_15s_05052021_05 TOP	1	22.8	5098.2	116418	2518513	22.7	2322.4	52603.6	1137990		2.21312
JDU633_R76_30x_4Z_2um_15s_05052021_05 LEFT	11	22.4	3858.6	86327.2	1867543	22.2	2258.5	50217	1086359		1.71908
JDU633_R76_30x_4Z_2um_15s_05052021_06	13	24.2	5607.2	135817	2938177	24.2	2410.9	58396.2	1263302		2.32579
JDU633_R76_30x_4Z_2um_15s_05052021_07	1	25.1	6325.6	158482	3428484	25.1	2613.1	65469.1	1416313		2.42071
SUM_JDU763_R76_30x_4Z_2um_15s_NM_20221118_02	2	32.3	3071.3	99096.2	2143779	32.3	2169.7	70004.3	1514424		1.41557
SUM_JDU763_R76_30x_4Z_2um_15s_NM_20221118_03	12	24.9	3321.9	82765.7	1790496	24.9	2128.3	53027.7	1147165		1.5608
SUM_JDU763_R76_30x_4Z_2um_15s_NM_20221118_04	1	20.8	2023.2	41990.7	908397	20.8	1744	36197	783060		1.16006
SUM_JDU763_R76_30x_4Z_2um_15s_NM_20221118_05	11	19	2916.2	55404	1198572	19	2060.1	39138.4	846692		1.41559
SUM_JDU763_R76_30x_4Z_2um_15s_NM_20221118_06	20	19.3	2668.6	51563.8	1115495	19.3	2088.6	40355.7	873027		1.27773
SUM_JDU763_R76_30x_4Z_2um_15s_NM_20221118_07	1	16.9	3577.6	60361.2	1305813	16.9	2317	39092.1	845692		1.54408
SUM_JDU763_R76_30x_4Z_2um_15s_NM_20221118_08	2	14.5	2919.5	42375.4	916719	14.5	2198	31903.3	690174		1.32825

## Sheet: Figure 4C_Microtubule density
Dataset of figure 4C: Microtubule density (GFP Signal/noise) (a.u.)
Group	hcp-2∆ + hcp-1(RNAi)					Test statistics
GFP transgene	No transgene	HCP-1(FL)	HCP-1(∆CBD)	HCP-1(∆KTD)		Number of families	1
Sample	JDU605_R76	JDU631_R76	JDU633_R76	JDU763_R76		Number of comparisons per family	3
	1.26492	2.94536	2.10516	1.41557		Alpha	0.05
	1.31629	3.08894	1.69948	1.5608
	1.24113	2.25523	2.98613	1.16006		Dunn's multiple comparisons test	Mean rank diff,	Significant?	Summary	Adjusted P Value	A-?
	1.37955	2.23253	1.62086	1.41559		JDU605_R76 vs. JDU631_R76	-19.03	Yes	***	0.0003	B	JDU631_R76
	1.21439	2.45714	1.80914	1.27773		JDU605_R76 vs. JDU633_R76	-16.89	Yes	***	0.0004	C	JDU633_R76
	1.092	1.79027	1.8555	1.54408		JDU605_R76 vs. JDU763_R76	-3.46	No	ns	>0,9999	D	JDU763_R76
	1.46005	1.52594	2.21312	1.32825
	1.16334		1.71908			Test details	Mean rank 1	Mean rank 2	Mean rank diff,	n1	n2	Z
	1.51794		2.32579			JDU605_R76 vs. JDU631_R76	7.111	26.14	-19.03	9	7	3.906
			2.42071			JDU605_R76 vs. JDU633_R76	7.111	24	-16.89	9	10	3.801
Test for normal distribution						JDU605_R76 vs. JDU763_R76	7.111	10.57	-3.46	9	7	0.7101
Anderson-Darling test
A2*	0.1557	N too small	0.3989	N too small
P value	0.9282		0.2951
Passed normality test (alpha=0.05)?	Yes		Yes			Kruskal-Wallis test
P value summary	ns		ns			P value	<0,0001
						Exact or approximate P value?	Approximate
D'Agostino & Pearson test						P value summary	****
K2	0.3483	N too small	3.225	N too small		Do the medians vary signif. (P < 0.05)?	Yes
P value	0.8402		0.1993			Number of groups	4
Passed normality test (alpha=0.05)?	Yes		Yes			Kruskal-Wallis statistic	24.01
P value summary	ns		ns
						Data summary
Shapiro-Wilk test						Number of treatments (columns)	4
W	0.9755	0.9553	0.9011	0.9519		Number of values (total)	33
P value	0.9375	0.7776	0.2252	0.7474
Passed normality test (alpha=0.05)?	Yes	Yes	Yes	Yes
P value summary	ns	ns	ns	ns
Kolmogorov-Smirnov test
KS distance	0.1399	0.148	0.1977	0.1531
P value	>0,1000	>0,1000	>0,1000	>0,1000
Passed normality test (alpha=0.05)?	Yes	Yes	Yes	Yes
P value summary	ns	ns	ns	ns
Number of values	9	7	10	7
Descriptive statistics
Number of values	9	7	10	7
Minimum	1.1	1.5	1.6	1.2
25% Percentile	1.2	1.8	1.7	1.3
Median	1.3	2.3	2	1.4
75% Percentile	1.4	2.9	2.3	1.5
Maximum	1.5	3.1	3	1.6
Range	0.43	1.6	1.4	0.4
10% Percentile	1.1	1.5	1.6	1.2
90% Percentile	1.5	3.1	2.9	1.6
95% CI of median
Actual confidence level	96%	98%	98%	98%
Lower confidence limit	1.2	1.5	1.7	1.2
Upper confidence limit	1.5	3.1	2.4	1.6
Mean	1.3	2.3	2.1	1.4
Std. Deviation	0.14	0.57	0.42	0.14
Std. Error of Mean	0.046	0.21	0.13	0.054
Lower 95% CI of mean	1.2	1.8	1.8	1.3
Upper 95% CI of mean	1.4	2.9	2.4	1.5
Coefficient of variation	11%	24%	20%	10%
Geometric mean	1.3	2.3	2	1.4
Geometric SD factor	1.1	1.3	1.2	1.1
Lower 95% CI of geo. mean	1.2	1.8	1.8	1.3
Upper 95% CI of geo. mean	1.4	2.9	2.3	1.5
Sum	12	16	21	9.7

## Sheet: Figure 4C_Spindle area
Dataset of figure 4C: spindle area (µm2)
Group	hcp-2∆ + hcp-1(RNAi)
GFP transgene	No transgene	HCP-1(FL)	HCP-1(∆CBD)	HCP-1(∆KTD)		Test statistics
Sample	JDU605_R76	JDU631_R76	JDU633_R76	JDU763_R76		Number of families	1
	27.7	27.5	24.6	32.3		Number of comparisons per family	3
	21.3	26.7	21.4	24.9		Alpha	0.05
	15.1	20.8	15.7	20.8
	17	27.4	25.2	19		Dunn's multiple comparisons test	Mean rank diff,	Significant?	Summary	Adjusted P Value	A-?
	16.4	28.3	33.1	19.3		JDU605_R76 vs. JDU631_R76	-11.53	Yes	*	0.0464	B	JDU631_R76
	16.7	20.3	26.3	16.9		JDU605_R76 vs. JDU633_R76	-7.289	No	ns	0.3024	C	JDU633_R76
	25.5	29.1	22.8	14.5		JDU605_R76 vs. JDU763_R76	-1.103	No	ns	>0,9999	D	JDU763_R76
	15.7		22.4
	22.8		24.2			Test details	Mean rank 1	Mean rank 2	Mean rank diff,	n1	n2	Z
			25.1			JDU605_R76 vs. JDU631_R76	12.11	23.64	-11.53	9	7	2.367
						JDU605_R76 vs. JDU633_R76	12.11	19.4	-7.289	9	10	1.641
						JDU605_R76 vs. JDU763_R76	12.11	13.21	-1.103	9	7	0.2264
Test for normal distribution
Anderson-Darling test
A2*	0.5461	N too small	0.5166	N too small		Kruskal-Wallis test
P value	0.1149		0.142			P value	0.063
Passed normality test (alpha=0.05)?	Yes		Yes			Exact or approximate P value?	Approximate
P value summary	ns		ns			P value summary	ns
						Do the medians vary signif. (P < 0.05)?	No
D'Agostino & Pearson test						Number of groups	4
K2	1.679	N too small	3.155	N too small		Kruskal-Wallis statistic	7.297
P value	0.4319		0.2065
Passed normality test (alpha=0.05)?	Yes		Yes			Data summary
P value summary	ns		ns			Number of treatments (columns)	4
						Number of values (total)	33
Shapiro-Wilk test
W	0.8693	0.7876	0.9142	0.908
P value	0.1209	0.0308	0.3108	0.3819
Passed normality test (alpha=0.05)?	Yes	No	Yes	Yes
P value summary	ns	*	ns	ns
Kolmogorov-Smirnov test
KS distance	0.2814	0.3201	0.2051	0.2346
P value	0.0384	0.029	>0,1000	>0,1000
Passed normality test (alpha=0.05)?	No	No	Yes	Yes
P value summary	*	*	ns	ns
Number of values	9	7	10	7
Descriptive statistics
Number of values	9	7	10	7
Minimum	15	20	16	15
25% Percentile	16	21	22	17
Median	17	27	24	19
75% Percentile	24	28	25	25
Maximum	28	29	33	32
Range	13	8.8	17	18
10% Percentile	15	20	16	15
90% Percentile	28	29	32	32
95% CI of median
Actual confidence level	96%	98%	98%	98%
Lower confidence limit	16	20	21	15
Upper confidence limit	26	29	26	32
Mean	20	26	24	21
Std. Deviation	4.7	3.6	4.4	5.9
Std. Error of Mean	1.6	1.4	1.4	2.2
Lower 95% CI of mean	16	22	21	16
Upper 95% CI of mean	23	29	27	27
Coefficient of variation	24%	14%	18%	28%
Geometric mean	19	25	24	20
Geometric SD factor	1.3	1.2	1.2	1.3
Lower 95% CI of geo. mean	16	22	21	16
Upper 95% CI of geo. mean	23	29	27	26
Sum	178	180	241	148
