# Supplementary material for: Synergistic stabilization of microtubules by BUB-1, HCP-1, and CLS-2 controls microtubule pausing and meiotic spindle assembly
Source: eLife. 2023 Feb 17;12:e82579. doi: 10.7554/eLife.82579 (PMC10005782; doi:10.7554/eLife.82579)
Supplement: Figure 4—source data 3. — Embryonic viability assay of hcp-2(ijm6) mutant, cls-2FL::gfp::hcp-111541154-1386 transgenic worms upon depletion of hcp-1 and/or cls-2. [file elife-82579-fig4-data3.xlsx]

## Sheet: Feuil1
Strain	JDU572
Treatment	No RNAi	cls-2(RNAi)	hcp-1(RNAi)	hcp-1(RNAi) cls-2(RNAi)
% Viable	96.2	92.3	6	0
% Embryonic lethal	3.8	7.7	94	100
Brood size	1486	1107	1435	749
n parents	12	10	15	9
