# Supplementary material for: Synergistic stabilization of microtubules by BUB-1, HCP-1, and CLS-2 controls microtubule pausing and meiotic spindle assembly
Source: eLife. 2023 Feb 17;12:e82579. doi: 10.7554/eLife.82579 (PMC10005782; doi:10.7554/eLife.82579)
Supplement: Figure 4—source data 4. — Quantifications of the meiotic defects in hcp-2(ijm6) mutant, cls-2FL::gfp::hcp-111541154-1386 transgenic worms upon depletion of hcp-1 and/or cls-2. [file elife-82579-fig4-data4.xlsx]

## Sheet: Feuil1
transgene	CLS-2FL::GFP::HCP-1(1154-1386)
Strain	JDU572
Treatment	No RNAi	cls-2(RNAi)	hcp-1(RNAi)	cls-2(RNAi) hcp-1(RNAi)
total samples (n)	10	10	10	14
Non-bipolar spindle	0	0	8	12
Absence of segregation	0	0	0	0
Abnormal segregation	0	0	4	5
1st polar body extrusion failure	0	0	0	3
No defect	10	10	2	2
