# Supplementary material for: Synergistic stabilization of microtubules by BUB-1, HCP-1, and CLS-2 controls microtubule pausing and meiotic spindle assembly
Source: eLife. 2023 Feb 17;12:e82579. doi: 10.7554/eLife.82579 (PMC10005782; doi:10.7554/eLife.82579)
Supplement: Figure 5—source data 1. — Embryonic viability assay of cls-2::gfp transgenic variants upon depletion of endogenous cls-2. [file elife-82579-fig5-data1.xlsx]

## Sheet: Feuil1
Treatment	Strain	N2	JDU26	JDU15	JDU193	JDU13	JDU22	JDU43	JDU114	JDU135	JDU44
	cls-2::gfp transgene	No transgene	FULL LENGTH	∆TOGL2	TOGL2-WKR/A	∆SR-RICH	∆TOGL3	∆LINKER	∆CTD	R970A	∆TAIL
No RNAi	% Viable	98.7	99.15	99.6	98.3	96.3	93.3	98.6	93.75	93.1	93.1
	% Embryonic lethal	1.3	0.85	0.4	1.7	3.7	6.7	1.4	6.25	6.9	6.9
	Brood size	156	234	838	241	485	358	573	528	943	829
	n parents	11	11	11	15	13	11	12	12	13	13
cls-2(RNAi)	% Viable	0.2	100	0	1	0	91.7	96.4	0.9	0.9	92.5
	% Embryonic lethal	99.8	0	100	99	100	8.3	3.6	99.1	99.1	7.5
	Brood size	511	463	590	397	348	398	615	462	806	604
	n parents	10	11	11	15	11	11	12	14	13	15
