# Supplementary material for: Synergistic stabilization of microtubules by BUB-1, HCP-1, and CLS-2 controls microtubule pausing and meiotic spindle assembly
Source: eLife. 2023 Feb 17;12:e82579. doi: 10.7554/eLife.82579 (PMC10005782; doi:10.7554/eLife.82579)
Supplement: Figure 5—source data 2. — Quantifications of the meiotic defects in cls-2::gfp transgenic variants upon depletion of endogenous cls-2. [file elife-82579-fig5-data2.xlsx]

## Sheet: Feuil1
GFP transgene	No transgene	CLS-2(FL)	CLS-2(TOGL2-WKR/A)	CLS-2(∆SR-rich)	CLS-2(∆CTD)	CLS-2(R970A)
Strain	JDU233	JDU243	JDU282	JDU336	JDU264	JDU263
Treatment	cls-2(RNAi)
total samples (n)	29	16	10	12	11	12
Non-bipolar spindle	24	0	10	12	11	12
Absence of segregation	22	0	7	11	2	6
Abnormal segregation	4	0	3	1	7	4
1st polar body extrusion failure	23	0	8	12	4	6
No defect	3	16	0	0	0	0
