# Supplementary material for: Synergistic stabilization of microtubules by BUB-1, HCP-1, and CLS-2 controls microtubule pausing and meiotic spindle assembly
Source: eLife. 2023 Feb 17;12:e82579. doi: 10.7554/eLife.82579 (PMC10005782; doi:10.7554/eLife.82579)
Supplement: Figure 6—figure supplement 1—source data 3. — Embryonic viability assay of worms carrying a cls-2::gfp transgene with mutations in the S/R-rich domain, upon depletion of cls-2 compared to non-depleted controls. [file elife-82579-fig6-figsupp1-data3.xlsx]

## Sheet: Feuil1
Treatment	Strain	JDU132	JDU143	JDU148	JDU134	JDU142	JDU145	JDU187
	cls-2::gfp transgene	SR-rich∆AB	SR-rich∆BC	SR-rich∆CD	SR-rich∆DE	SR-rich∆AC	SR-rich∆BD	SR-rich∆CE
No RNAi	% Viable	97.2973	84.1386	79.3911	97.7041	75.7971	63.5052	95.102
	% Embryonic lethal	2.7027	15.8614	20.6089	2.29592	24.2029	36.4948	4.89796
	Brood size	999	1097	854	392	690	485	490
	n parents	10	13	11	9	10	14	15
cls-2(RNAi)	% Viable	98.4962	88.8191	99.5943	97.8365	91.5638	98.7919	99.7835
	% Embryonic lethal	1.50376	11.1809	0.40568	2.16346	8.43621	1.20805	0.21645
	Brood size	665	796	493	416	486	745	462
	n parents	10	11	7	10	8	13	10
