# Supplementary material for: Synergistic stabilization of microtubules by BUB-1, HCP-1, and CLS-2 controls microtubule pausing and meiotic spindle assembly
Source: eLife. 2023 Feb 17;12:e82579. doi: 10.7554/eLife.82579 (PMC10005782; doi:10.7554/eLife.82579)
Supplement: Figure 6—source data 1. — Raw measurements and calculations for quantification of microtubule dynamics. Parameters were extracted from kymographs using the ImageJ software (https://imagej.nih.gov/ij/index.html). Each sheet corresponds to an experiment. The first sheet (read me) provides details about data extraction. [file elife-82579-fig6-data1.xlsx]

## Sheet: README
											3.14159	s	µm	µm/s	s	µm	s	s	Event/min	Event/min	%			Growth rate			Shrink rate			Catastrophe			Rescue
angle raw	length raw		angle pol	angle depol	angle pause	length pol	length depol	length pause	N of Cata	N of rescue	G rate	G duration	G distance	S rate	S duration	S distance	Pause dur.	Time G+S	Freq Cata	Freq Rescue	% in pause			mean	SD	N	mean	SD	N	mean	SD	N	mean	SD	N
-77.255	258.366		-77.255	-170.218	0	258.366	58.856	0	1	0	0.00814266	756.001	6.15586	0.208809	29.9989	6.26403	0	786	0.079365	0	0		second	0.00814266	#DIV/0!	1	0.208809	#DIV/0!	1	0.00132275	#DIV/0!	1	0.0333346	#DIV/0!	1
-170.218	58.856																						minute	0.488559	#DIV/0!	1	12.5285	#DIV/0!	1	0.079365	#DIV/0!	1	2.00007	#DIV/0!	1
0.000	0.000
…	…																							Growth duration			Shrink duration
																								mean	SD	N	mean	SD	N		TOTAL G+S	G dur	S dur.
We reported here, catastrophe and rescue frequencies and the time spent in pause for each microtubule within its total lifetime.																							sec	756.001	#DIV/0!	1	29.9989	#DIV/0!	1	sec	786	756.001	29.9989
																							min	12.6	#DIV/0!	1	0.499981	#DIV/0!	1	min	13.1	12.6	0.499981
Microtubule lifetime refers here to period from the time at which microtubule first emanates from the seed to the time it disapears
independently of intermediate events (pause, catastrophe, rescue).																								G	C	S	R				TOTAL L G+S	G length	S length
																								0.00814266	0.00132275	0.208809	0.0333346			µm	12.4199	6.15586	6.26403
Data were extracted from kymographs generated by tracking individual microtubules nucleated from GMPCPP seeds.																								Mean	SD	N
																							AVG Cata	0.079365	#DIV/0!	1
Duration of events were extracted from slopes on kymographs.																							AVG Rescue	0	#DIV/0!	1
A and B columns correspond to raw data.																							AVG %pause	0	#DIV/0!	1			<L>	J
																													356.475	-0.000137623
angle > -90° correspond to growth event																							Total pause duration		0		EVENTs
-90° > angle > -180° correspond to depolymerization events																							number of pause		0		Cat/min	Rescue/min	Pause/min		Cat/µm	Rescue/µm	Pause/µm
Events are then sorted from columns D to I																											0.079365	0	0		0.162447	0	0
Number of catastrophe and rescue were manually counted within each microtubule lifetime																							pause dur./GS duration		0	min/min
Catastrophe frequency corresponds to the number of events divided by growth duration (G duration) within individual microtubule lifetime.																							N pause / GS duration		0	event/min	0	by count	0	by count			0	by count
Rescue frequency corresponds to the number of events divided by shrinkage duration (S duration) within individual microtubule lifetime.
% of time spent in pause corresponds to the time in pause for each microtubule lifetime.																							Counting
																							Catastrophe	Rescue	Pause	N of kymos	Frames ?
*note that here in this data, growth duration can include time in pause as microtubule can pause during growth excursions,																							1	0	0		401
the growth rate calculated here does not represent individual growth events plotted in the Figure 6C
For Growth rate please report to Figure 6 - Source Data 1 - Panel C source data

## Sheet: 210207_seeds_CTRL
											3.14159	s	µm	µm/s	s	µm	s	s	Event/min	Event/min	%			Growth rate			Shrink rate			Catastrophe			Rescue
angle raw	length raw		angle pol	angle depol	angle pause	length pol	length depol	length pause	N of Cata	N of rescue	G rate	G duration	G distance	S rate	S duration	S distance	Pause dur.	Time G+S	Freq Cata	Freq Rescue	% in pause			mean	SD	N	mean	SD	N	mean	SD	N	mean	SD	N
-77.255	258.366		-77.255	-170.218	0	258.366	58.856	0	1	0	0.00814266	756.001	6.15586	0.208809	29.9989	6.26403	0	786	0.079365	0	0		second	0.00880191	0.00204711	95	0.288618	0.151442	95	0.00311129	0.00187556	95	0.0747553	0.0471866	95
-170.218	58.856		-84.963	-163.811	0	148.072	16.14	0	1	0	0.00317302	442.501	1.40406	0.124002	13.4998	1.674	0	456	0.135593	0	0		minute	0.528114	0.122827	95	17.3171	9.08651	95	0.186677	0.112534	95	4.48532	2.8312	95
0.000	0.000		-74.407	-173.29	0	44.643	17.117	0	1	0	0.0100466	129	1.29601	0.305992	6.00006	1.83597	0	135	0.465117	0	0
-84.963	148.072		-70.787	-165.964	0	69.893	24.739	0	1	0	0.0125457	198	2.48405	0.144002	18	2.59204	0	216	0.30303	0	0			Growth duration			Shrink duration
-163.811	16.140		-78.354	-173.418	0	133.754	26.173	0	1	0	0.00741986	393.001	2.91602	0.311997	9.00025	2.80805	0	402.002	0.152671	0	0			mean	SD	N	mean	SD	N		TOTAL G+S	G dur	S dur.
0.000	0.000		-70.769	-171.027	0	45.541	19.235	0	1	0	0.0125584	128.999	1.62002	0.22799	9.00019	2.05196	0	137.999	0.465119	0	0		sec	321.411	193.754	95	13.377	8.44374	95	sec	31804.8	30534	1270.81
-74.407	44.643		-69.444	-167.005	0	42.72	13.342	0	1	0	0.0135	120	1.62	0.155995	9.00049	1.40403	0	129	0.5	0	0		min	5.35684	3.22924	95	0.22295	0.140729	95	min	530.08	508.9	21.1802
-173.290	17.117		-71.917	-171.027	0	51.546	19.235	0	1	0	0.0117548	147	1.72796	0.22799	9.00019	2.05196	0	156	0.408163	0	0
0.000	0.000		-77.407	-170.134	0	192.634	46.69	0	1	0	0.00804233	564	4.53587	0.206996	24.0002	4.96795	0	588	0.106383	0	0			G	C	S	R				TOTAL L G+S	G length	S length
-70.787	69.893		-76.494	-170.87	-90	209.802	56.719	16	1	0	0.00864681	612	5.29186	0.224004	26.9997	6.04805	48	639	0.0980392	0	7.51174			0.00880191	0.00311129	0.288618	0.0747553			µm	570.737	260.874	309.863
-165.964	24.739		-77.612	-173.211	0	177.124	42.297	0	1	0	0.0079072	519	4.10384	0.302399	15.0002	4.53605	0	534	0.115607	0	0			mean	SD	N
0.000	0.000		-73.233	-168.69	0	162.926	50.99	0	1	0	0.0108464	467.998	5.0761	0.179999	30.0001	5.39998	0	497.998	0.128206	0	0		AVG Cata	0.294992	0.264706	95
-78.354	133.754		-78.97	-174.094	0	120.221	29.155	0	1	0	0.00701725	354.001	2.48411	0.348008	8.99986	3.13203	0	363	0.169491	0	0		AVG Rescue	0	0	95
-173.418	26.173		-80.811	-166.43	0	137.768	29.833	0	1	0	0.00582363	408	2.37604	0.149148	20.9994	3.13202	0	428.999	0.147059	0	0		AVG %pause	0.627964	4.46564	95			<L>	J
0.000	0.000		-79.16	-172.875	0	47.854	32.249	0	1	0	0.00689341	141	0.971974	0.288	12	3.456	0	153	0.425531	0	0								10.5856	-0.003082
-70.769	45.541		-70.346	-174.56	0	44.598	21.095	0	1	0	0.0128573	125.999	1.62001	0.378023	5.99963	2.268	0	131.999	0.476193	0	0		Total pause duration		2.1		EVENTs
-171.027	19.235		-72.474	-176.634	0	39.85	17.029	0	1	0	0.0113687	114.001	1.29604	0.612083	2.99952	1.83596	0	117	0.526313	0	0		number of pause		4		Cat/min	Rescue/min	Pause/min		Cat/µm	Rescue/µm	Pause/µm
0.000	0.000		-76.866	-177.125	0	30.806	16.125	0	1	0	0.00839998	90.0005	0.756003	0.71684	2.42635	1.73931	0	92.4268	0.666663	0	0						0.178817	0	0.00754603		0.348828	0	0.00700848
-69.444	42.720		-76.908	-168.111	0	44.147	19.416	0	1	0	0.00837216	128.999	1.08	0.170995	12	2.05195	0	140.999	0.465122	0	0
-167.005	13.342		-75.593	-168.232	0	112.539	49.031	0	1	0	0.00924791	327	3.02407	0.172804	29.9995	5.18405	0	356.999	0.183486	0	0		pause dur./GS duration		0.00396166	min/min
0.000	0.000		-75.964	-173.66	0	86.585	27.166	0	1	0	0.00899983	252	2.26796	0.32401	8.99968	2.91598	0	260.999	0.238096	0	0		N pause / GS duration		0.00754603	event/min	0.00754603	by count	0.00754603	by count			0.00700848	by count
-71.917	51.546		-71.707	-169.16	0	127.44	47.854	0	1	0	0.011901	362.999	4.32004	0.188005	26.9993	5.07601	0	389.998	0.16529	0	0
-171.027	19.235		-75.793	-171.529	0	81.492	23.759	0	1	0	0.00911407	236.999	2.16003	0.241718	10.4997	2.53798	0	247.499	0.253166	0	0		Counting
0.000	0.000		-76.608	-170.272	0	86.348	35.511	0	1	0	0.00857109	252	2.15992	0.209991	18.001	3.78004	0	270.001	0.238095	0	0		Catastrophe	Rescue	Pause	N of kymos	Frames ?
-77.407	192.634		-77.005	-169.046	0	80.05	31.575	0	1	0	0.00830794	234	1.94406	0.186001	17.9997	3.34797	0	251.999	0.256411	0	0		91	0	4		401
-170.134	46.690		-76.464	-167.661	0	111.086	32.757	0	1	0	0.00866675	324.001	2.80804	0.164572	21.0001	3.45604	0	345.001	0.185185	0	0
0.000	0.000		-74.018	-171.724	0	214.283	55.579	0	1	0	0.0103106	618.002	6.37197	0.247497	24.0004	5.94002	0	642.002	0.0970871	0	0
-76.494	209.802		-77.784	-175.601	0	99.247	26.077	0	1	0	0.00779399	290.999	2.26805	0.467968	6.00044	2.80802	0	297	0.206186	0	0
-170.870	56.719		-76.608	-167.471	0	21.587	9.22	0	1	0	0.00857109	63	0.539979	0.161997	6.00039	0.972047	0	69.0004	0.95238	0	0
-90.000	16.000		-74.055	-171.384	0	36.401	33.377	0	1	0	0.0102854	105.002	1.07999	0.23759	15.0008	3.56404	0	120.002	0.57142	0	0
-77.612	177.124		-74.578	-167.735	0	60.166	23.537	0	1	0	0.00993092	173.999	1.72797	0.165597	15.0001	2.48398	0	188.999	0.34483	0	0
-173.211	42.297		-79.531	-174.094	0	93.557	29.155	0	1	0	0.00665205	275.999	1.83596	0.348008	8.99986	3.13203	0	284.999	0.217392	0	0
0.000	0.000		-71.565	-173.29	0	88.544	34.234	0	1	0	0.012	252.001	3.02402	0.305992	12.0001	3.67195	0	264.001	0.238095	0	0
-73.233	162.926		-75.851	-171.119	0	245.447	64.777	0	1	0	0.0090753	714.003	6.4798	0.230391	30.0014	6.91204	0	744.004	0.0840333	0	0
-168.690	50.990		-78.93	-173.991	0	46.872	19.105	0	1	0	0.00704334	138	0.971979	0.342	6	2.052	0	144	0.434784	0	0
0.000	0.000		-74.258	-171.529	0	154.806	47.518	0	1	0	0.0101476	446.999	4.53598	0.241718	20.9995	5.07596	0	467.999	0.134228	0	0
-78.970	120.221		-73.54	-173.991	0	45.88	19.105	0	1	0	0.0106363	131.999	1.40399	0.342	6	2.052	0	137.999	0.454548	0	0
-174.094	29.155		-74.939	-175.101	0	284.782	70.257	0	1	0	0.00968725	824.999	7.99198	0.420008	17.9997	7.56004	0	842.999	0.0727274	0	0
0.000	0.000		-78.755	-174.094	0	174.347	29.155	0	1	0	0.00715757	513	3.67184	0.348008	8.99986	3.13203	0	522	0.116959	0	0
-80.811	137.768		-74.338	-170.538	0	111.126	30.414	0	1	0	0.0100934	321	3.23998	0.216007	14.9996	3.24002	0	336	0.186916	0	0
-166.430	29.833		-76.264	-172.235	0	92.65	22.204	0	1	0	0.00879981	270.001	2.37596	0.264005	8.99997	2.37604	0	279.001	0.222222	0	0
0.000	0.000		-77.125	-176.987	0	71.805	19.026	0	1	0	0.00822856	209.999	1.72799	0.683951	3.00016	2.05197	0	212.999	0.285715	0	0
-79.160	47.854		-76.732	-168.906	0	235.281	51.971	0	1	0	0.0084888	687.002	5.83183	0.183595	30.0007	5.50798	0	717.003	0.087336	0	0
-172.875	32.249		-72.646	-172.235	0	67.052	22.204	0	1	0	0.01125	191.999	2.15999	0.264005	8.99997	2.37604	0	200.999	0.312501	0	0
0.000	0.000		-75.107	-170.538	0	97.268	24.331	0	1	0	0.00957414	282.002	2.69993	0.216007	11.9996	2.592	0	294.001	0.212765	0	0
-70.346	44.598		-78.93		0	93.744	0	0	0	0	0.00704334	275.999	1.94396		0	0	0	275.999	0		0
-174.560	21.095		-73.496	-170.134	0	28.16	23.345	0	1	0	0.0106664	80.9994	0.863974	0.206996	12.0001	2.48397	0	92.9995	0.740746	0	0
0.000	0.000		-77.062	-170.538	0	151.855	36.497	0	1	0	0.00827022	444	3.67198	0.216007	17.9996	3.88805	0	461.999	0.135135	0	0
-72.474	39.850		-74.358	-172.648	0	103.846	31.257	0	1	0	0.0100798	300	3.02395	0.279014	11.9994	3.348	0	312	0.2	0	0
-176.634	17.029		-75.225	-173.157	0	188.223	50.359	0	1	0	0.0094948	545.998	5.18415	0.29999	18.0007	5.40003	0	563.999	0.10989	0	0
0.000	0.000		-77.293		0	104.561	0	0	0	0	0.00811756	306	2.48398		0	0	0	306	0		0
-76.866	30.806		-79.509	-171.87	0	82.377	21.213	0	1	0	0.00666635	243	1.61992	0.252003	8.9998	2.26798	0	252	0.246914	0	0
7.125	16.125		-80.018	-174.806	0	126.921	22.091	0	1	0	0.0063361	374.999	2.37604	0.396032	5.99958	2.37603	0	380.999	0.16	0	0
0.000	0.000		-78.465	-169.695	0	150.03	33.541	0	1	0	0.00734718	440.999	3.24011	0.197997	18.0003	3.564	0	459	0.136055	0	0
-76.908	44.147		-78.381	-169.046	0	109.238	31.575	0	1	0	0.00740217	320.999	2.37609	0.186001	17.9997	3.34797	0	338.998	0.186917	0	0
-168.111	19.416		-78.374	-171.995	0	106.689	32.315	0	1	0	0.00740676	313.5	2.32202	0.255991	13.5005	3.45601	0	327.001	0.191387	0	0
0.000	0.000		-77.093	-174.289	0	98.489	30.15	0	1	0	0.00824972	288.002	2.37594	0.359974	9.00075	3.24004	0	297.002	0.208332	0	0
-75.593	112.539		-77.067	-172.504	-90	138.514	38.328	11	1	0	0.00826692	405.001	3.34811	0.273594	15.0005	4.10405	33	420.001	0.148148	0	7.85712
-168.232	49.031		-76.759	-171.674	0	69.857	41.437	0	1	0	0.0084709	204	1.72806	0.245989	18.0009	4.42803	0	222	0.294118	0	0
0.000	0.000		-74.644	-170.538	-90	200.145	54.745	4	1	0	0.0098863	578.999	5.72417	0.216007	26.9992	5.83202	12	605.998	0.103627	0	1.9802
-75.964	86.585		-77.55	-171.87	0	78.854	21.213	0	1	0	0.00794805	230.999	1.83599	0.252003	8.9998	2.26798	0	239.999	0.259741	0	0
-173.660	27.166		-74.745	-174.56	0	22.804	21.095	0	1	0	0.00981809	66.0015	0.648009	0.378023	5.99963	2.268	0	72.0011	0.909071	0	0
0.000	0.000		-73.909	-173.991	0	54.12	19.105	0	1	0	0.0103847	155.999	1.62001	0.342	6	2.052	0	161.999	0.384617	0	0
-71.707	127.440		-77.005	-173.157	0	80.05	25.179	0	1	0	0.00830794	234	1.94406	0.29999	9.00017	2.69996	0	243	0.256411	0	0
-169.160	47.854		-81.536	-172.405	0	169.85	30.265	0	1	0	0.00535711	504	2.69999	0.269987	12.0004	3.23994	0	516.001	0.119048	0	0
0.000	0.000		-75.432	0	0	182.88	0	0	0	0	0.00935582	531.001	4.96796		0	0	0	531.001	0		0
-75.793	81.492		-75.414	0	0	277.959	0	0	0	0	0.0093679	807.002	7.55992		0	0	0	807.002	0		0
-171.529	23.759		-72.35	-172.147	-90	23.087	29.275	11	1	0	0.0114544	66.0006	0.756002	0.26101	11.9997	3.13205	33	78.0003	0.909082	0	42.3075
0.000	0.000		-75.05	-167.905	0	197.692	57.271	0	1	0	0.0096125	573.001	5.50798	0.167996	36.0005	6.04796	0	609.002	0.104712	0	0
-76.608	86.348		-77.196	-170.69	0	180.488	61.814	0	1	0	0.00818163	528	4.31991	0.219598	30.0001	6.58797	0	558	0.113636	0	0
-170.272	35.511		-77.764	-175.764	0	84.929	27.074	0	1	0	0.00780715	248.999	1.94397	0.486045	5.99945	2.916	0	254.998	0.240965	0	0
0.000	0.000		-77.905	-173.089	0	28.636	33.242	0	1	0	0.00771444	84.001	0.648021	0.29701	11.9998	3.56405	0	96.0007	0.714277	0	0
-77.005	80.050		-63.435	-171.469	0	22.361	20.224	0	1	0	0.0179999	60.0009	1.08001	0.239993	9.00036	2.16003	0	69.0012	0.999985	0	0
-169.046	31.575		-76.214	-171.87	0	222.407	56.569	0	1	0	0.00883311	648	5.72386	0.252003	23.9999	6.04805	0	672	0.0925926	0	0
0.000	0.000		-75.579	-173.29	0	72.277	34.234	0	1	0	0.00925729	209.999	1.94402	0.305992	12.0001	3.67195	0	221.999	0.285716	0	0
-76.464	111.086		-79.38	-172.694	0	146.509	39.319	0	1	0	0.00675022	431.998	2.91609	0.28079	15.0004	4.21198	0	446.999	0.138889	0	0
-167.661	32.757		-76.727	-172.747	0	200.352	55.444	0	1	0	0.00849212	585	4.9679	0.282865	20.9996	5.94004	0	606	0.102564	0	0
0.000	0.000		-80.272	-172.875	0	106.532	24.187	0	1	0	0.00617169	315.001	1.94409	0.288	9.00006	2.59202	0	324.001	0.190476	0	0
-74.018	214.283		-74.548	-174.144	0	127.613	39.205	0	1	0	0.0099512	369.001	3.67201	0.351	12.0001	4.21204	0	381.001	0.162601	0	0
-171.724	55.579		-80.889	-176.82	0	107.355	18.028	0	1	0	0.00577335	318.002	1.83594	0.647965	3.0002	1.94403	0	321.002	0.188678	0	0
0.000	0.000		-80.972	-177.274	0	108.342	21.024	0	1	0	0.00571987	321	1.83608	0.756086	2.99969	2.26802	0	323.999	0.186916	0	0
-77.784	99.247		-75.256	-171.119	0	39.294	32.388	0	1	0	0.00947397	114	1.08004	0.230391	15.0004	3.45597	0	129.001	0.526314	0	0
-175.601	26.077		-77.471	-174.289	0	110.635	30.15	0	1	0	0.00800012	324.001	2.59205	0.359974	9.00075	3.24004	0	333.002	0.185185	0	0
0.000	0.000		-78.69	-177.89	0	30.594	8	0	1	0	0.00720004	89.9996	0.648001	0.977115	0.883635	0.863414	0	90.8833	0.666669	0	0
-76.608	21.587		-78.69	-172.093	0	152.971	36.346	0	1	0	0.00720004	450.001	3.24003	0.259205	14.9999	3.88805	0	465.001	0.133333	0	0
-167.471	9.220		-73.61	-168.69	0	53.16	20.396	0	1	0	0.0105885	152.999	1.62004	0.179999	12	2.15999	0	164.999	0.392159	0	0
0.000	0.000		-75.635	-168.69	0	84.646	20.396	0	1	0	0.00921978	245.999	2.26806	0.179999	12	2.15999	0	257.999	0.243904	0	0
-74.055	36.401		-78.69	-171.254	0	35.693	13.153	0	1	0	0.00720004	105	0.756002	0.234004	5.99991	1.40401	0	110.999	0.571431	0	0
-171.384	33.377		-75.964	-161.565	0	12.369	6.325	0	1	0	0.00899983	35.9991	0.323986	0.108	6.00044	0.648045	0	41.9996	1.66671	0	0
0.000	0.000		-78.996	-171.87	0	36.674	7.071	0	1	0	0.00700029	107.999	0.756026	0.252003	2.99993	0.755993	0	110.999	0.55556	0	0
-74.578	60.166		-81.254	-171.87	0	26.306	21.213	0	1	0	0.00553835	78.0004	0.431994	0.252003	8.9998	2.26798	0	87.0002	0.769227	0	0
-167.735	23.537		-78.203	-170.074	0	161.409	40.608	0	1	0	0.00751882	473.999	3.56392	0.205719	20.9995	4.32002	0	494.999	0.126582	0	0
0.000	0.000		-79.011	-174.644	0	104.924	32.14	0	1	0	0.00699051	309	2.16007	0.383987	9.0002	3.45596	0	318	0.194175	0	0
-79.531	93.557		-76.581	-169.114	180	202.529	52.953	0	1	0	0.00858902	590.999	5.07611	0.187191	30.0014	5.61601	0	621.001	0.101523	0	0
-174.094	29.155		-76.192	-171.254	0	243.023	65.765	0	1	0	0.00884777	708	6.26422	0.234004	29.9996	7.02003	0	737.999	0.0847458	0	0
0.000	0.000
-71.565	88.544
-173.290	34.234
0.000	0.000
-75.851	245.447
-171.119	64.777
0.000	0.000
-78.930	46.872
-173.991	19.105
0.000	0.000
-74.258	154.806
-171.529	47.518
0.000	0.000
-73.540	45.880
-173.991	19.105
0.000	0.000
-74.939	284.782
-175.101	70.257
0.000	0.000
-78.755	174.347
-174.094	29.155
0.000	0.000
-74.338	111.126
-170.538	30.414
0.000	0.000
-76.264	92.650
-172.235	22.204
0.000	0.000
-77.125	71.805
-176.987	19.026
0.000	0.000
-76.732	235.281
-168.906	51.971
0.000	0.000
-72.646	67.052
-172.235	22.204
0.000	0.000
-75.107	97.268
-170.538	24.331
0.000	0.000
-78.930	93.744
0.000	0.000
0.000	0.000
-73.496	28.160
-170.134	23.345
0.000	0.000
-77.062	151.855
-170.538	36.497
0.000	0.000
-74.358	103.846
-172.648	31.257
0.000	0.000
-75.225	188.223
-173.157	50.359
0.000	0.000
-77.293	104.561
0.000	0.000
0.000	0.000
-79.509	82.377
-171.870	21.213
0.000	0.000
-80.018	126.921
-174.806	22.091
0.000	0.000
-78.465	150.030
-169.695	33.541
0.000	0.000
-78.381	109.238
-169.046	31.575
0.000	0.000
-78.374	106.689
-171.995	32.315
0.000	0.000
-77.093	98.489
-174.289	30.150
0.000	0.000
-77.067	138.514
-172.504	38.328
-90.000	11.000
-76.759	69.857
-171.674	41.437
0.000	0.000
-74.644	200.145
-170.538	54.745
-90.000	4.000
-77.550	78.854
-171.870	21.213
0.000	0.000
-74.745	22.804
-174.560	21.095
0.000	0.000
-73.909	54.120
-173.991	19.105
0.000	0.000
-77.005	80.050
-173.157	25.179
0.000	0.000
-81.536	169.850
-172.405	30.265
0.000	0.000
-75.432	182.880
0.000	0.000
0.000	0.000
-75.414	277.959
0.000	0.000
0.000	0.000
-72.350	23.087
-172.147	29.275
-90.000	11.000
-75.050	197.692
-167.905	57.271
0.000	0.000
-77.196	180.488
-170.690	61.814
0.000	0.000
-77.764	84.929
-175.764	27.074
0.000	0.000
-77.905	28.636
-173.089	33.242
0.000	0.000
-63.435	22.361
-171.469	20.224
0.000	0.000
-76.214	222.407
-171.870	56.569
0.000	0.000
-75.579	72.277
-173.290	34.234
0.000	0.000
-79.380	146.509
-172.694	39.319
0.000	0.000
-76.727	200.352
-172.747	55.444
0.000	0.000
-80.272	106.532
-172.875	24.187
0.000	0.000
-74.548	127.613
-174.144	39.205
0.000	0.000
-80.889	107.355
-176.820	18.028
0.000	0.000
-80.972	108.342
-177.274	21.024
0.000	0.000
-75.256	39.294
-171.119	32.388
0.000	0.000
-77.471	110.635
-174.289	30.150
0.000	0.000
-78.690	30.594
180.000	8.000
0.000	0.000
-78.690	152.971
-172.093	36.346
0.000	0.000
-73.610	53.160
-168.690	20.396
0.000	0.000
-75.635	84.646
-168.690	20.396
0.000	0.000
-78.690	35.693
-171.254	13.153
0.000	0.000
-75.964	12.369
-161.565	6.325
0.000	0.000
-78.996	36.674
-171.870	7.071
0.000	0.000
-81.254	26.306
-171.870	21.213
0.000	0.000
-78.203	161.409
-170.074	40.608
0.000	0.000
-79.011	104.924
-174.644	32.140
0.000	0.000
-76.581	202.529
-169.114	52.953
180.000	1.000
-76.192	243.023
-171.254	65.765
0.000	0.000

## Sheet: 210215_ctrl_001
											3.14159	s	µm	µm/s	s	µm	s	s	Event/min	Event/min	%			Growth rate			Shrink rate			Catastrophe			Rescue
angle raw	length raw		angle pol	angle depol	angle pause	length pol	length depol	length pause	N of Cata	N of rescue	G rate	G duration	G distance	S rate	S duration	S distance	Pause dur.	Time G+S	Freq Cata	Freq Rescue	% in pause			mean	SD	N	mean	SD	N	mean	SD	N	mean	SD	N
-75.324	173.666		-75.324	0	0	173.666	0	0	1	0	0.0094283	504	4.75187		0	0	0	504	0.119048		0		second	0.0097094	0.00204236	191	0.324163	0.192158	191	0.00274893	0.00148134	191	0.0871461	0.0694728	191
0.000	0.000		-71.288	-173.157	0	65.46	25.179	0	1	0	0.0121937	186	2.26803	0.29999	9.00017	2.69996	0	195	0.322581	0	0		minute	0.582564	0.122542	191	19.4498	11.5295	191	0.164936	0.0888802	191	5.22876	4.16837	191
0.000	0.000		-74.416	0	0	305.221	0	0	1	0	0.0100405	882.001	8.85577		0	0	0	882.001	0.0680271		0
-71.288	65.460		-76.578	-172.147	-90	90.471	29.275	29	1	0	0.00859101	264	2.26803	0.26101	11.9997	3.13205	87	276	0.227273	0	31.5218			Growth duration			Shrink duration
-173.157	25.179		-78.457	-169.287	0	144.931	37.656	0	1	0	0.00735242	425.999	3.13213	0.190288	20.9996	3.99597	0	446.999	0.140845	0	0			mean	SD	N	mean	SD	N		TOTAL G+S	G dur	S dur.
0.000	0.000		-80.538	-173.418	0	121.655	26.173	0	1	0	0.00599979	360	2.15992	0.311997	9.00025	2.80805	0	369	0.166667	0	0		sec	363.778	196.031	191	11.475	9.14786	191	sec	71673.2	69481.5	2191.72
-74.416	305.221		-70.852	-173.089	0	76.217	33.242	0	1	0	0.0124999	216.001	2.69999	0.29701	11.9998	3.56405	0	228.001	0.277777	0	0		min	6.06296	3.26719	191	0.19125	0.152464	191	min	1194.55	1158.03	36.5287
0.000	0.000		-72.956	-174.92	0	143.293	45.177	0	1	0	0.0110365	410.999	4.536	0.404968	12.0008	4.85995	0	423	0.145986	0	0
0.000	0.000		-77.159	-173.991	90	139.488	38.21	38	1	0	0.00820609	407.998	3.34807	0.342	12	4.10401	114	419.998	0.147059	0	27.143			G	C	S	R				TOTAL L G+S	G length	S length
-76.578	90.471		-73.775	0	0	196.84	0	0	0	0	0.010476	567.001	5.9399		0	0	0	567.001	0		0			0.0097094	0.00274893	0.324163	0.0871461			µm	1282.76	674.548	608.21
-172.147	29.275		-73.74	-174.289	0	25	10.05	0	1	0	0.0104998	72.0001	0.755991	0.359974	3.00025	1.08001	0	75.0003	0.833332	0	0			mean	SD	N
-90.000	29.000		-74.427	-171.254	0	126.649	39.459	0	1	0	0.0100331	365.999	3.6721	0.234004	17.9997	4.21202	0	383.999	0.163935	0	0		AVG Cata	0.232635	0.216847	191
-78.457	144.931		-73.402	-171.469	90	325.566	101.119	101	1	0	0.0107307	936.001	10.0439	0.239993	45.0013	10.8	303	981.003	0.0641025	0	30.8868		AVG Rescue	0.0355691	0.300727	191
-169.287	37.656		-76.967	-173.418	0	110.856	26.173	0	1	0	0.00833309	324.001	2.69993	0.311997	9.00025	2.80805	0	333.001	0.185185	0	0		AVG %pause	0.539065	3.8448	191			<L>	J
0.000	0.000		-73.443	-176.82	0	38.601	18.028	0	1	0	0.0107026	111.001	1.18801	0.647965	3.0002	1.94403	0	114.002	0.540534	0	0								69.9967	-0.000500198
-80.538	121.655		-69.677	-172.875	0	28.792	16.125	0	1	0	0.0133332	80.9991	1.07998	0.288	6.00017	1.72805	0	86.9992	0.740749	0	0		Total pause duration		10.15		EVENTs
-173.418	26.173		-71.162	0	0	89.811	0	0	0	0	0.012282	255.001	3.13193		0	0	0	255.001	0		0		number of pause		5		Cat/min	Rescue/min	Pause/min		Cat/µm	Rescue/µm	Pause/µm
0.000	0.000		-73.301	-174.806	0	31.321	11.045	0	1	0	0.0107998	90.0003	0.971989	0.396032	2.99965	1.18796	0	93	0.666664	0	0						0.145938	0.0547515	0.00418566		0.250538	0.00328834	0.00389785
-70.852	76.217		-80.838	-175.236	0	62.801	12.042	0	1	0	0.00580622	185.999	1.07995	0.431967	3.00033	1.29604	0	189	0.322582	0	0
-173.089	33.242		-78.996	-175.236	0	36.674	12.042	0	1	0	0.00700029	107.999	0.756026	0.431967	3.00033	1.29604	0	110.999	0.55556	0	0		pause dur./GS duration		0.0084969	min/min
0.000	0.000		-70.953	0	0	88.865	0	0	0	0	0.0124288	251.999	3.13206		0	0	0	251.999	0		0		N pause / GS duration		0.00418566	event/min	0.00418566	by count	0.00418566	by count			0.00389785	by count
-72.956	143.293		-78.232	0	0	294.184	0	0	0	0	0.0074998	864.002	6.47985		0	0	0	864.002	0		0
-174.920	45.177		-68.199	-169.875	0	64.622	28.443	0	1	0	0.0143997	180.001	2.59195	0.201593	15.0005	3.024	0	195.001	0.333332	0	0		Counting
0.000	0.000		-81.347	-165.964	0	46.53	12.369	0	1	0	0.00547855	138.001	0.756047	0.144002	8.99962	1.29597	0	147.001	0.434779	0	0		Catastrophe	Rescue	Pause	N of kymos	Frames ?
-77.159	139.488		-73.764	0	0	189.56	0	0	0	0	0.0104835	546	5.72399		0	0	0	546	0		0		169	2	5		401
-173.991	38.210		-77.02	0	0	302.736	0	0	0	0	0.00829801	885.002	7.34376		0	0	0	885.002	0		0
-173.991	38.210		-70.278	-172.235	0	56.303	22.204	0	1	0	0.0129055	159.001	2.05198	0.264005	8.99997	2.37604	0	168.001	0.377356	0	0
-73.775	196.840		-76.39	-170.91	0	97.745	25.318	0	1	0	0.00871596	285.001	2.48406	0.225007	11.9996	2.7	0	297.001	0.210526	0	0
0.000	0.000		-74.792	0	0	213.476	0	0	0	0	0.00978637	618	6.04798		0	0	0	618	0		0
0.000	0.000		-71.87	-171.469	0	118.903	40.447	0	1	0	0.0117875	338.999	3.99595	0.239993	18.0003	4.31994	0	357	0.176991	0	0
-73.740	25.000		-75.027	-176.055	0	89.022	29.069	0	1	0	0.00962798	257.998	2.48401	0.522024	5.99974	3.13201	0	263.998	0.232559	0	0
-174.289	10.050		-78.69	-169.695	0	56.089	11.18	0	1	0	0.00720004	164.999	1.188	0.197997	5.99991	1.18796	0	170.999	0.363638	0	0
0.000	0.000		-82.057	0	0	173.666	0	0	0	0	0.00502295	516	2.59184		0	0	0	516	0		0
-74.427	126.649		-75.964	-169.38	0	49.477	16.279	0	1	0	0.00899983	143.999	1.29597	0.191993	9.00039	1.72802	0	153	0.416668	0	0
-171.254	39.459		-71.565	-169.216	0	104.355	42.755	0	1	0	0.012	296.999	3.564	0.189005	23.9993	4.53599	0	320.999	0.202021	0	0
0.000	0.000		-75.379	-174.56	0	47.539	21.095	0	1	0	0.00939138	137.999	1.296	0.378023	5.99963	2.268	0	143.998	0.434787	0	0
-73.402	325.566		-75.411	-175.03	0	75.432	23.087	0	1	0	0.00936991	219	2.05201	0.413978	6.00037	2.48402	0	225	0.273973	0	0
-171.469	101.119		-73.811	-172.405	0	96.84	30.265	0	1	0	0.0104515	279	2.91596	0.269987	12.0004	3.23994	0	291	0.215054	0	0
-171.469	101.119		-72.734	0	0	154.984	0	0	1	0	0.0111893	444	4.96806		0	0	0	444	0.135135		0
-76.967	110.856		-76.278	-172.569	0	88.527	23.195	0	1	0	0.00879049	258.001	2.26796	0.276015	8.99958	2.48402	0	267	0.232557	0	0
-173.418	26.173		-75.141	-171.254	0	152.086	39.459	0	1	0	0.00955127	441.001	4.21212	0.234004	17.9997	4.21202	0	459	0.136054	0	0
0.000	0.000		-74.416	0	0	152.611	0	0	0	0	0.0100405	441.002	4.4279		0	0	0	441.002	0		0
-73.443	38.601		-73.358	-172.278	0	192.044	59.54	0	1	0	0.0107608	551.999	5.93996	0.265494	24.0006	6.37201	0	576	0.108696	0	0
-176.820	18.028		-77.005	-164.055	0	26.683	14.56	0	1	0	0.00830794	77.9989	0.648011	0.126003	11.9995	1.51198	0	89.9984	0.769241	0	0
0.000	0.000		-75.964	-173.29	0	49.477	17.117	0	1	0	0.00899983	143.999	1.29597	0.305992	6.00006	1.83597	0	149.999	0.416668	0	0
-69.677	28.792		-74.055	-176.987	0	50.961	19.026	0	1	0	0.0102854	147.001	1.51197	0.683951	3.00016	2.05197	0	150.001	0.408161	0	0
-172.875	16.125		-74.168	-169.824	0	139.284	39.623	0	1	0	0.0102087	402.001	4.10391	0.200561	21.0009	4.21197	0	423.002	0.149253	0	0
0.000	0.000		-73.96	-173.541	0	166.481	53.339	0	1	0	0.01035	479.999	4.96801	0.317991	18.0007	5.72405	0	498	0.125	0	0
-71.162	89.811		-73.821	-173.29	0	168.68	51.352	0	1	0	0.0104446	485.999	5.07609	0.305992	18.0005	5.50803	0	503.999	0.123457	0	0
0.000	0.000		-73.217	-170.789	0	131.605	37.483	0	1	1	0.0108574	377.998	4.10407	0.222	17.9998	3.99597	0	395.998	0.158731	3.33337	0
0.000	0.000		-79.629	0	0	155.541	0	0	0	0	0.0065884	459	3.02407		0	0	0	459	0		0
-73.301	31.321		-73.877	-168.93	0	133.24	46.872	0	1	0	0.0104065	383.998	3.99609	0.184003	26.9994	4.96799	0	410.998	0.156251	0	0
-174.806	11.045		-75.114	-171.87	0	163.487	49.497	0	1	0	0.00956943	474.001	4.53592	0.252003	20.9995	5.29195	0	495	0.126582	0	0
0.000	0.000		-71.565	-171.085	0	142.302	51.624	0	1	1	0.012	404.998	4.86	0.229498	24.0004	5.50804	0	428.999	0.148149	2.49996	0
-80.838	62.801		-77.033	-170.538	0	155.978	54.745	0	1	0	0.00828941	456.001	3.77999	0.216007	26.9992	5.83202	0	483.001	0.131579	0	0
-175.236	12.042		-75.141	-168.232	0	50.695	24.515	0	1	0	0.00955127	146.999	1.40403	0.172804	14.9995	2.59197	0	161.999	0.408165	0	0
0.000	0.000		-72.144	-167.093	0	156.541	49.244	0	1	0	0.0115971	447.001	5.18395	0.157096	32.9988	5.18398	0	480	0.134228	0	0
-78.996	36.674		-77.196	-167.471	0	22.561	9.22	0	1	0	0.00818163	66	0.539988	0.161997	6.00039	0.972047	0	72.0004	0.909091	0	0
-175.236	12.042		-75.964	-156.038	0	12.369	9.849	0	1	0	0.00899983	35.9991	0.323986	0.0810018	11.9999	0.972018	0	47.9991	1.66671	0	0
0.000	0.000		-81.573	-170.538	0	27.295	12.166	0	1	0	0.00533335	81.0009	0.432007	0.216007	6.00003	1.29605	0	87.001	0.740732	0	0
-70.953	88.865		-73.899	-173.089	0	201.921	66.483	0	1	0	0.0103915	582.002	6.0479	0.29701	23.9992	7.12799	0	606.001	0.103093	0	0
0.000	0.000		-70.545	-171.254	0	106.586	32.882	0	1	0	0.0127164	301.501	3.83402	0.234004	14.9996	3.50996	0	316.5	0.199004	0	0
0.000	0.000		-70.442	-170.362	0	161.307	53.759	0	1	0	0.0127893	456	5.83192	0.211989	27.0014	5.72402	0	483.002	0.131579	0	0
-78.232	294.184		-72.312	-171.995	0	194.18	64.63	0	1	0	0.0114807	555.001	6.37183	0.255991	27.001	6.91203	0	582.002	0.108108	0	0
0.000	0.000		-71.966	-169.216	0	45.222	21.378	0	1	0	0.0117207	129.001	1.51199	0.189005	11.9999	2.26805	0	141.001	0.465112	0	0
0.000	0.000		-67.964	-169.992	0	45.31	17.263	0	1	0	0.0145712	126	1.83598	0.203999	9.00019	1.83603	0	135	0.47619	0	0
-68.199	64.622		-71.884	-173.991	0	170.449	57.315	0	1	0	0.0117777	485.999	5.72397	0.342	18	6.15601	0	503.999	0.123457	0	0
-169.875	28.443		-71.847	8.746	0	64.195	26.306	0	1	0	0.0118035	183	2.16003	0.234004	-11.9998	-2.80801	0	171	0.327869	0	0
0.000	0.000		-70.017	-165.964	0	35.114	12.369	0	1	0	0.0130908	98.9998	1.29599	0.144002	8.99962	1.29597	0	107.999	0.606062	0	0
-81.347	46.530		-68.962	-175.601	0	27.857	13.038	0	1	0	0.0138465	78.0004	1.08003	0.467968	3.00011	1.40396	0	81.0005	0.769227	0	0
-165.964	12.369		-73.095	-172.147	0	106.607	29.275	0	1	0	0.0109411	306.001	3.34798	0.26101	11.9997	3.13205	0	318.001	0.196078	0	0
0.000	0.000		-64.058	-170.538	0	41.146	18.248	0	1	0	0.0175133	111	1.94398	0.216007	8.99955	1.94397	0	120	0.54054	0	0
-73.764	189.560		-72.719	-170.538	0	47.127	18.248	0	1	0	0.0111996	134.999	1.51194	0.216007	8.99955	1.94397	0	143.999	0.444448	0	0
0.000	0.000		-78.024	-169.112	0	33.734	10	0	1	0	0.00763627	98.9993	0.755986	0.187156	5.66669	1.06056	0	104.666	0.606065	0	0
0.000	0.000		-69.677	-172.875	0	57.585	16.125	0	1	0	0.0133332	162.001	2.16	0.288	6.00017	1.72805	0	168.001	0.370368	0	0
-77.020	302.736		-72.504	-173.089	0	96.462	33.242	0	1	0	0.011348	275.998	3.13203	0.29701	11.9998	3.56405	0	287.998	0.217393	0	0
0.000	0.000		-74.152	-172.304	0	161.124	37.336	0	1	0	0.0102195	464.999	4.75208	0.266402	14.9998	3.99597	0	479.999	0.129033	0	0
0.000	0.000		-73.25	-172.2	0	215.128	73.682	0	1	0	0.0108348	618.001	6.6959	0.262806	29.9994	7.88403	0	648.001	0.0970872	0	0
-70.278	56.303		-77.692	-167.905	0	56.294	14.318	0	1	0	0.00785453	165	1.296	0.167996	9.00029	1.51202	0	174.001	0.363636	0	0
-172.235	22.204		-77.749	-173.928	0	179.078	47.265	0	1	0	0.00781702	525	4.10394	0.338425	14.9988	5.07598	0	539.999	0.114286	0	0
0.000	0.000		-73.244	-172.875	0	97.124	32.249	0	1	0	0.0108389	279.001	3.02406	0.288	12	3.456	0	291.001	0.215053	0	0
-76.390	97.745		-72.007	-174.289	0	246.033	70.349	0	1	0	0.0116922	702.002	8.20798	0.359974	21.0015	7.55998	0	723.003	0.0854699	0	0
-170.910	25.318		-76.701	-177.274	0	56.515	21.024	0	1	0	0.00850937	164.998	1.40403	0.756086	2.99969	2.26802	0	167.998	0.36364	0	0
0.000	0.000		-72.759	-171.027	0	60.729	19.235	0	1	0	0.0111721	174.001	1.94395	0.22799	9.00019	2.05196	0	183.001	0.344826	0	0
-74.792	213.476		-71.297	0	0	202.704	0	0	0	0	0.0121874	576	7.01996		0	0	0	576	0		0
0.000	0.000		-75.489	-171.87	0	87.801	35.355	0	1	0	0.0093176	255	2.37599	0.252003	14.9997	3.77996	0	270	0.235294	0	0
0.000	0.000		-85.135	-169.695	0	47.17	11.18	0	1	0	0.00306413	141	0.432044	0.197997	5.99991	1.18796	0	147	0.425531	0	0
-71.870	118.903		-76.409	0	0	187.243	0	0	0	0	0.00870332	545.999	4.75201		0	0	0	545.999	0		0
-171.469	40.447		-75.225	-173.884	0	94.112	28.16	0	1	0	0.0094948	273	2.59209	0.335972	9.00065	3.02397	0	282.001	0.21978	0	0
0.000	0.000		-76.293	-171.573	0	84.404	27.295	0	1	0	0.0087805	246.001	2.16001	0.242999	12.0002	2.91603	0	258.001	0.243902	0	0
-75.027	89.022		-75.021	-171.973	0	309.517	78.772	0	1	0	0.00963202	896.999	8.63993	0.25528	32.9991	8.42402	0	929.999	0.0668897	0	0
-176.055	29.069		-71.445	-173.774	0	150.841	55.326	0	1	0	0.0120839	429	5.18398	0.329991	18.0004	5.93997	0	447.001	0.13986	0	0
0.000	0.000		-75.964	-176.634	0	41.231	17.029	0	1	0	0.00899983	120	1.07998	0.612083	2.99952	1.83596	0	122.999	0.5	0	0
-78.690	56.089		-79.38	-167.905	0	32.558	14.318	0	1	0	0.00675022	96.0009	0.648028	0.167996	9.00029	1.51202	0	105.001	0.624994	0	0
-169.695	11.180		-77.137	-178.025	0	130.269	29.017	0	1	0	0.00822063	381	3.13206	1.04396	3.00008	3.13197	0	384	0.15748	0	0
0.000	0.000		-75.635	-176.634	0	169.293	34.059	0	1	0	0.00921978	492	4.53614	0.612083	5.99922	3.67203	0	497.999	0.121951	0	0
-82.057	173.666		-76.126	-174.226	0	143.177	29.818	0	1	0	0.00889176	417	3.70786	0.35602	8.9995	3.20401	0	425.999	0.143885	0	0
0.000	0.000		-74.338	-172.093	0	111.126	36.346	0	1	0	0.0100934	321	3.23998	0.259205	14.9999	3.88805	0	336	0.186916	0	0
0.000	0.000		-75.426	-170.134	0	154.987	46.69	0	1	0	0.00935985	450	4.21194	0.206996	24.0002	4.96795	0	474	0.133333	0	0
-75.964	49.477		-75.677	-176.73	0	97.015	35.057	0	1	0	0.00919167	281.998	2.59204	0.630094	5.99909	3.77999	0	287.997	0.212767	0	0
-169.380	16.279		-74.463	-174.207	0	231.458	69.354	0	1	0	0.0100087	669	6.69584	0.354844	21.0007	7.45198	0	690.001	0.0896861	0	0
0.000	0.000		-75.561	-171.87	0	172.447	49.497	0	1	0	0.00926934	501	4.64395	0.252003	20.9995	5.29195	0	522	0.11976	0	0
-71.565	104.355		-75.518	0	0	155.955	0	0	0	0	0.00929816	452.999	4.21206		0	0	0	452.999	0		0
-169.216	42.755		-76.564	-173.019	0	185.065	49.366	0	1	0	0.00860031	539.999	4.64417	0.294002	17.9999	5.292	0	557.999	0.111111	0	0
0.000	0.000		-75.838	-171.254	0	110.354	26.306	0	1	0	0.00908399	321	2.91597	0.234004	11.9998	2.80801	0	333	0.186916	0	0
-75.379	47.539		-75.353	-170.538	0	90.956	30.414	0	1	0	0.00940883	264	2.48394	0.216007	14.9996	3.24002	0	279	0.227272	0	0
-174.560	21.095		-73.496	-173.211	0	140.801	42.297	0	1	0	0.0106664	405	4.3199	0.302399	15.0002	4.53605	0	420	0.148148	0	0
0.000	0.000		-76.866	-169.38	0	61.612	16.279	0	1	0	0.00839998	180.001	1.51201	0.191993	9.00039	1.72802	0	189.001	0.333332	0	0
-75.411	75.432		-73.163	-176.906	0	79.404	37.054	0	1	0	0.0108944	228	2.48393	0.666012	5.99989	3.996	0	234	0.263157	0	0
-175.030	23.087		-73.926	-172.093	0	122.801	36.346	0	1	0	0.0103732	354	3.67211	0.259205	14.9999	3.88805	0	369	0.169491	0	0
0.000	0.000		-76.399	-172.235	0	63.789	22.204	0	1	0	0.00870997	186	1.62006	0.264005	8.99997	2.37604	0	195	0.32258	0	0
-73.811	96.840		-75.619	-171.254	0	40.262	13.153	0	1	0	0.0092305	117.001	1.07998	0.234004	5.99991	1.40401	0	123.001	0.512815	0	0
-172.405	30.265		-72.784	-176.987	0	74.33	19.026	0	1	0	0.0111549	212.999	2.37598	0.683951	3.00016	2.05197	0	215.999	0.281691	0	0
0.000	0.000		-76.135	0	0	162.742	0	0	0	0	0.00888576	474.001	4.21186		0	0	0	474.001	0		0
-72.734	154.984		-77.125	-172.147	0	107.708	29.275	0	1	0	0.00822856	315	2.592	0.26101	11.9997	3.13205	0	327	0.190476	0	0
0.000	0.000		-76.809	-170.784	0	65.734	21.378	0	1	0	0.00843775	191.999	1.62004	0.221878	10.2715	2.27902	0	202.27	0.312502	0	0
0.000	0.000		-73.163	0	0	158.808	0	0	0	0	0.0108944	456.001	4.96786		0	0	0	456.001	0		0
-76.278	88.527		-73.334	-173.66	0	163.884	45.277	0	1	0	0.0107772	470.999	5.07607	0.32401	14.9996	4.86001	0	485.999	0.127389	0	0
-172.569	23.195		-79.76	-176.309	0	157.509	31.064	0	1	0	0.00650337	465	3.02407	0.558058	5.99929	3.34795	0	471	0.129032	0	0
0.000	0.000		-76.037	-172.875	0	190.633	40.311	0	1	0	0.00895111	555	4.96787	0.288	14.9999	4.31997	0	570	0.108108	0	0
-75.141	152.086		-84.611	-167.471	0	53.235	9.22	0	1	0	0.00339603	158.999	0.539966	0.161997	6.00039	0.972047	0	164.999	0.377361	0	0
-171.254	39.459		-81.158	-175.601	0	45.541	13.038	0	1	0	0.00560011	134.999	0.756013	0.467968	3.00011	1.40396	0	137.999	0.444447	0	0
0.000	0.000		-74.134	-176.309	0	98.762	31.064	0	1	0	0.0102318	284.999	2.91604	0.558058	5.99929	3.34795	0	290.998	0.210527	0	0
-74.416	152.611		-74.055	-168.69	180	94.641	30.594	1	1	0	0.0102854	272.999	2.80792	0.179999	18	3.23999	3.67394e-16	290.999	0.219781	0	1.26253e-16
0.000	0.000		-70.463	-171.254	0	32.894	13.153	0	1	0	0.0127744	93.0005	1.18803	0.234004	5.99991	1.40401	0	99.0004	0.645158	0	0
0.000	0.000		-72.3	-178.01	0	98.671	22	0	1	0	0.0114891	282	3.23992	1.03609	2.29185	2.37457	0	284.292	0.212766	0	0
-73.358	192.044		-74.442	-172.569	0	182.694	46.39	0	1	0	0.0100229	528	5.29211	0.276015	17.9992	4.96804	0	545.999	0.113636	0	0
-172.278	59.540		-83.517	-174.289	0	88.566	10.05	0	1	0	0.00409086	263.999	1.07998	0.359974	3.00025	1.08001	0	266.999	0.227274	0	0
0.000	0.000		-81.621	-176.055	0	130.392	29.069	0	1	0	0.00530253	387.001	2.05208	0.522024	5.99974	3.13201	0	393	0.155039	0	0
-77.005	26.683		-71.565	-173.29	0	31.623	17.117	0	1	0	0.012	90.0006	1.08001	0.305992	6.00006	1.83597	0	96.0007	0.666662	0	0
-164.055	14.560		-74.358	-169.695	0	25.962	11.18	0	1	0	0.0100798	75.0015	0.756003	0.197997	5.99991	1.18796	0	81.0014	0.799984	0	0
0.000	0.000		-75.466	-174.472	0	111.571	31.145	0	1	0	0.00933302	324.002	3.02392	0.371968	9.0008	3.34802	0	333.003	0.185184	0	0
-75.964	49.477		-74.917	-176.186	0	146.031	30.067	0	1	0	0.00970208	423.001	4.10399	0.54001	5.99996	3.24004	0	429.001	0.141844	0	0
-173.290	17.117		-70.583	0	-90	276.74	0	35	0	0	0.0126896	783	9.93597		0	0	105	783	0		13.41
0.000	0.000		-79.909	-165.174	0	119.854	35.171	0	1	0	0.00640674	354	2.26799	0.136004	26.9991	3.67201	0	380.999	0.169492	0	0
-74.055	50.961		-74.268	0	0	147.526	0	0	0	0	0.0101408	425.999	4.31999		0	0	0	425.999	0		0
-176.987	19.026		-73.241	-172.875	0	183.807	48.374	0	1	0	0.0108409	528	5.72401	0.288	18.0001	5.18405	0	546	0.113636	0	0
0.000	0.000		-77.605	-178.152	0	93.172	31.016	0	1	0	0.00791181	273.001	2.15993	1.11576	3.00062	3.34799	0	276.001	0.21978	0	0
-74.168	139.284		-75.735	-174.094	0	121.754	29.155	0	1	0	0.00915286	354	3.24011	0.348008	8.99986	3.13203	0	363	0.169492	0	0
-169.824	39.623		-75.069	-171.87	0	93.145	28.284	0	1	0	0.00959971	270	2.59193	0.252003	11.9997	3.02397	0	282	0.222222	0	0
0.000	0.000		-77.851	-173.541	0	294.598	53.339	0	1	0	0.00774993	864	6.69595	0.317991	18.0007	5.72405	0	882.001	0.0694444	0	0
-73.960	166.481		-72.874	-173.884	0	179.981	56.321	0	1	0	0.0110929	516.002	5.72397	0.335972	18.0016	6.04805	0	534.003	0.116279	0	0
-173.541	53.339		-75.28	-172.875	0	122.004	32.249	0	1	0	0.00945785	353.999	3.34807	0.288	12	3.456	0	365.999	0.169492	0	0
0.000	0.000		-75.426	-174.611	0	206.649	53.235	0	1	0	0.00935985	599.999	5.61591	0.381622	14.999	5.72397	0	614.998	0.1	0	0
-73.821	168.680		-73.951	-171.87	0	75.961	28.284	0	1	0	0.0103562	219.001	2.26801	0.252003	11.9997	3.02397	0	231.001	0.273971	0	0
-173.290	51.352		-72.646	-176.634	0	150.867	51.088	0	1	0	0.01125	431.999	4.85998	0.612083	8.99874	5.50799	0	440.997	0.138889	0	0
0.000	0.000		-70.183	-175.101	0	117.987	35.128	0	1	0	0.0129729	333	4.31996	0.420008	8.99974	3.77996	0	341.999	0.18018	0	0
-73.217	131.605		-74.713	0	0	155.502	0	0	0	0	0.0098397	450	4.42787		0	0	0	450	0		0
-170.789	37.483		-74.291	-176.634	0	33.242	17.029	0	1	0	0.0101252	96.0012	0.972035	0.612083	2.99952	1.83596	0	99.0007	0.624992	0	0
0.000	0.000		-74.01	-173.541	0	177.882	53.339	0	1	0	0.010316	512.999	5.29212	0.317991	18.0007	5.72405	0	531	0.116959	0	0
-79.629	155.541		-76.149	-177.51	0	75.186	23.022	0	1	0	0.00887642	218.999	1.94393	0.82785	3.00057	2.48403	0	222	0.273974	0	0
0.000	0.000		-77.471	-174.289	0	101.415	30.15	0	1	0	0.00800012	297	2.37604	0.359974	9.00075	3.24004	0	306.001	0.20202	0	0
0.000	0.000		-81.254	-175.03	0	52.612	23.087	0	1	0	0.00553835	156.001	0.863988	0.413978	6.00037	2.48402	0	162.001	0.384614	0	0
-73.877	133.240		-75.743	0	0	251.754	0	0	1	0	0.00914751	732.001	6.69599		0	0	0	732.001	0.0819672		0
-168.930	46.872		-73.496	-174.289	0	112.641	40.2	0	1	0	0.0106664	324.001	3.45593	0.359974	12.001	4.32005	0	336.002	0.185185	0	0
0.000	0.000		-75.181	-171.18	0	230.673	58.694	0	1	0	0.00952437	669.001	6.37183	0.23201	26.9988	6.26399	0	696	0.0896859	0	0
-75.114	163.487		-73.706	-171.87	0	203.16	77.782	0	1	0	0.010523	585	6.15598	0.252003	32.9997	8.31603	0	618	0.102564	0	0
-171.870	49.497		-70.313	-172.057	0	115.767	43.417	0	1	0	0.0128806	327	4.21198	0.258015	17.9991	4.64405	0	344.999	0.183486	0	0
0.000	0.000		-77.171	-172.648	0	103.586	31.257	0	1	0	0.00819816	303.001	2.48405	0.279014	11.9994	3.348	0	315	0.198019	0	0
-71.565	142.302		-74.766	-170.91	0	243.559	75.954	0	1	0	0.00980392	705.002	6.91178	0.225007	35.9989	8.10001	0	741	0.0851062	0	0
-171.085	51.624		-73.217	-174.207	0	197.408	69.354	0	1	0	0.0108574	566.998	6.15612	0.354844	21.0007	7.45198	0	587.999	0.10582	0	0
0.000	0.000		-75.476	-166.464	0	199.372	55.543	0	1	0	0.00932631	579.002	5.39996	0.149537	39.0006	5.83202	0	618.002	0.103627	0	0
-77.033	155.978		-77.8	-175.601	0	75.71	26.077	0	1	0	0.00778347	222	1.72794	0.467968	6.00044	2.80802	0	228.001	0.27027	0	0
-170.538	54.745		-77.593	-172.725	0	153.587	47.381	0	1	0	0.00791972	450	3.56388	0.282	17.9998	5.07595	0	468	0.133333	0	0
0.000	0.000		-77.502	-173.234	0	198.708	59.414	0	1	0	0.00797968	581.998	4.64416	0.303436	20.9995	6.37202	0	602.998	0.103093	0	0
-75.141	50.695		-76.218	-172.333	0	163.713	52.469	0	1	0	0.00883045	476.999	4.21212	0.267421	21.0005	5.61599	0	497.999	0.125787	0	0
-168.232	24.515		-78.759	-168.996	0	164.149	36.674	0	1	0	0.00715496	483	3.45585	0.185135	21.0007	3.88797	0	504.001	0.124224	0	0
0.000	0.000		-75.809	-170.538	0	89.739	24.331	0	1	0	0.00910337	261.002	2.376	0.216007	11.9996	2.592	0	273.001	0.229884	0	0
-72.144	156.541		-75.677	-173.517	0	145.523	44.283	0	1	0	0.00919167	422.999	3.88807	0.316803	14.9998	4.75198	0	437.999	0.141844	0	0
-167.093	49.244		-77.082	-177.207	0	111.83	41.049	0	1	0	0.008257	326.999	2.70003	0.73792	6.00068	4.42803	0	333	0.183487	0	0
0.000	0.000		-71.467	0	0	185.626	0	0	0	0	0.0120685	527.999	6.37215		0	0	0	527.999	0		0
-77.196	22.561		-75.225	-171.87	0	188.223	42.426	1	1	0	0.0094948	545.998	5.18415	0.252003	17.9996	4.53596	0	563.998	0.10989	0	0
-167.471	9.220		-76.588	-173.66	0	133.645	45.277	0	1	0	0.00858437	390	3.34791	0.32401	14.9996	4.86001	0	405	0.153846	0	0
0.000	0.000		-75.719	0	0	227.015	0	0	0	0	0.00916356	659.999	6.04795		0	0	0	659.999	0		0
-75.964	12.369		-74.962	-173.991	0	69.376	19.105	0	1	0	0.00967176	201	1.94403	0.342	6	2.052	0	207	0.298507	0	0
-156.038	9.849		-77.093	0	0	98.489	0	0	1	0	0.00824972	288.002	2.37594		0	0	0	288.002	0.208332		0
0.000	0.000		-74.687	-172.875	0	174.184	48.374	0	1	0	0.00985726	504	4.96806	0.288	18.0001	5.18405	0	522	0.119048	0	0
-81.573	27.295		-73.811	-173.211	0	129.12	42.297	0	1	0	0.0104515	372	3.88795	0.302399	15.0002	4.53605	0	387	0.16129	0	0
-170.538	12.166		-73.151	-173.089	0	182.85	66.483	0	1	0	0.0109026	525.002	5.72391	0.29701	23.9992	7.12799	0	549.001	0.114285	0	0
0.000	0.000		-78.311	-171.87	0	29.614	7.071	0	1	0	0.00744803	86.9996	0.647976	0.252003	2.99993	0.755993	0	89.9995	0.689659	0	0
-73.899	201.921		-71.301	-172.875	0	137.244	40.311	0	1	0	0.0121846	389.999	4.75199	0.288	14.9999	4.31997	0	404.999	0.153847	0	0
-173.089	66.483		-75.6	-171.87	0	152.801	49.497	0	1	0	0.00924322	444.001	4.10401	0.252003	20.9995	5.29195	0	465.001	0.135135	0	0
0.000	0.000		-73.233	-173.66	0	162.926	54.332	0	1	0	0.0108464	467.998	5.0761	0.32401	17.9994	5.83197	0	485.997	0.128206	0	0
-70.545	106.586		-74.097	-171.573	0	186.124	54.589	0	1	0	0.0102569	537.001	5.50797	0.242999	23.9999	5.83196	0	561.001	0.111732	0	0
-171.254	32.882		-76.015	0	0	273.095	0	0	0	0	0.00896579	795.001	7.12781		0	0	0	795.001	0		0
0.000	0.000		-75.588	-171.529	0	184.816	47.518	0	1	0	0.00925126	537	4.96793	0.241718	20.9995	5.07596	0	558	0.111732	0	0
-70.442	161.307		-76.12	-172.321	0	266.79	89.805	0	1	0	0.00889576	776.999	6.912	0.266998	36	9.61196	0	812.999	0.0772201	0	0
-170.362	53.759		-74.476	-173.83	0	112.089	37.216	0	1	0	0.00999991	323.999	3.23997	0.333009	11.9998	3.99605	0	335.999	0.185185	0	0
0.000	0.000		-72.031	0	0	77.795	0	0	0	0	0.0116756	222.001	2.59199		0	0	0	222.001	0		0
-72.312	194.180		-75.489	-174.447	0	131.701	36.17	0	1	0	0.0093176	382.499	3.56398	0.370283	10.5001	3.88803	0	392.999	0.156863	0	0
-171.995	64.630		-76.759	-172.962	0	148.446	40.807	0	1	0	0.0084709	433.499	3.67213	0.291597	15	4.37395	0	448.499	0.138409	0	0
0.000	0.000
-71.966	45.222
-169.216	21.378
0.000	0.000
-67.964	45.310
-169.992	17.263
0.000	0.000
-71.884	170.449
-173.991	57.315
0.000	0.000
-71.847	64.195
8.746	26.306
0.000	0.000
-70.017	35.114
-165.964	12.369
0.000	0.000
-68.962	27.857
-175.601	13.038
0.000	0.000
-73.095	106.607
-172.147	29.275
0.000	0.000
-64.058	41.146
-170.538	18.248
0.000	0.000
-72.719	47.127
-170.538	18.248
0.000	0.000
-78.024	33.734
180.000	10.000
0.000	0.000
-69.677	57.585
-172.875	16.125
0.000	0.000
-72.504	96.462
-173.089	33.242
0.000	0.000
-74.152	161.124
-172.304	37.336
0.000	0.000
-73.250	215.128
-172.200	73.682
0.000	0.000
-77.692	56.294
-167.905	14.318
0.000	0.000
-77.749	179.078
-173.928	47.265
0.000	0.000
-73.244	97.124
-172.875	32.249
0.000	0.000
-72.007	246.033
-174.289	70.349
0.000	0.000
-76.701	56.515
-177.274	21.024
0.000	0.000
-72.759	60.729
-171.027	19.235
0.000	0.000
-71.297	202.704
0.000	0.000
0.000	0.000
-75.489	87.801
-171.870	35.355
0.000	0.000
-85.135	47.170
-169.695	11.180
0.000	0.000
-76.409	187.243
0.000	0.000
0.000	0.000
-75.225	94.112
-173.884	28.160
0.000	0.000
-76.293	84.404
-171.573	27.295
0.000	0.000
-75.021	309.517
-171.973	78.772
0.000	0.000
-71.445	150.841
-173.774	55.326
0.000	0.000
-75.964	41.231
-176.634	17.029
0.000	0.000
-79.380	32.558
-167.905	14.318
0.000	0.000
-77.137	130.269
-178.025	29.017
0.000	0.000
-75.635	169.293
-176.634	34.059
0.000	0.000
-76.126	143.177
-174.226	29.818
0.000	0.000
-74.338	111.126
-172.093	36.346
0.000	0.000
-75.426	154.987
-170.134	46.690
0.000	0.000
-75.677	97.015
-176.730	35.057
0.000	0.000
-74.463	231.458
-174.207	69.354
0.000	0.000
-75.561	172.447
-171.870	49.497
0.000	0.000
-75.518	155.955
0.000	0.000
0.000	0.000
-76.564	185.065
-173.019	49.366
0.000	0.000
-75.838	110.354
-171.254	26.306
0.000	0.000
-75.353	90.956
-170.538	30.414
0.000	0.000
-73.496	140.801
-173.211	42.297
0.000	0.000
-76.866	61.612
-169.380	16.279
0.000	0.000
-73.163	79.404
-176.906	37.054
0.000	0.000
-73.926	122.801
-172.093	36.346
0.000	0.000
-76.399	63.789
-172.235	22.204
0.000	0.000
-75.619	40.262
-171.254	13.153
0.000	0.000
-72.784	74.330
-176.987	19.026
0.000	0.000
-76.135	162.742
0.000	0.000
0.000	0.000
-77.125	107.708
-172.147	29.275
0.000	0.000
-76.809	65.734
10.784	21.378
0.000	0.000
-73.163	158.808
0.000	0.000
0.000	0.000
-73.334	163.884
-173.660	45.277
0.000	0.000
-79.760	157.509
-176.309	31.064
0.000	0.000
-76.037	190.633
-172.875	40.311
0.000	0.000
-84.611	53.235
-167.471	9.220
0.000	0.000
-81.158	45.541
-175.601	13.038
0.000	0.000
-74.134	98.762
-176.309	31.064
0.000	0.000
-74.055	94.641
-168.690	30.594
180.000	1.000
-70.463	32.894
-171.254	13.153
0.000	0.000
-72.300	98.671
180.000	22.000
0.000	0.000
-74.442	182.694
-172.569	46.390
0.000	0.000
-83.517	88.566
-174.289	10.050
0.000	0.000
-81.621	130.392
-176.055	29.069
0.000	0.000
-71.565	31.623
-173.290	17.117
0.000	0.000
-74.358	25.962
-169.695	11.180
0.000	0.000
-75.466	111.571
-174.472	31.145
0.000	0.000
-74.917	146.031
-176.186	30.067
0.000	0.000
-70.583	276.740
0.000	0.000
-90.000	35.000
-79.909	119.854
-165.174	35.171
0.000	0.000
-74.268	147.526
0.000	0.000
0.000	0.000
-73.241	183.807
-172.875	48.374
0.000	0.000
-77.605	93.172
-178.152	31.016
0.000	0.000
-75.735	121.754
-174.094	29.155
0.000	0.000
-75.069	93.145
-171.870	28.284
0.000	0.000
-77.851	294.598
-173.541	53.339
0.000	0.000
-72.874	179.981
-173.884	56.321
0.000	0.000
-75.280	122.004
-172.875	32.249
0.000	0.000
-75.426	206.649
-174.611	53.235
0.000	0.000
-73.951	75.961
-171.870	28.284
0.000	0.000
-72.646	150.867
-176.634	51.088
0.000	0.000
-70.183	117.987
-175.101	35.128
0.000	0.000
-74.713	155.502
0.000	0.000
0.000	0.000
-74.291	33.242
-176.634	17.029
0.000	0.000
-74.010	177.882
-173.541	53.339
0.000	0.000
-76.149	75.186
-177.510	23.022
0.000	0.000
-77.471	101.415
-174.289	30.150
0.000	0.000
-81.254	52.612
-175.030	23.087
0.000	0.000
-75.743	251.754
0.000	0.000
0.000	0.000
-73.496	112.641
-174.289	40.200
0.000	0.000
-75.181	230.673
-171.180	58.694
0.000	0.000
-73.706	203.160
-171.870	77.782
0.000	0.000
-70.313	115.767
-172.057	43.417
0.000	0.000
-77.171	103.586
-172.648	31.257
0.000	0.000
-74.766	243.559
-170.910	75.954
0.000	0.000
-73.217	197.408
-174.207	69.354
0.000	0.000
-75.476	199.372
-166.464	55.543
0.000	0.000
-77.800	75.710
-175.601	26.077
0.000	0.000
-77.593	153.587
-172.725	47.381
0.000	0.000
-77.502	198.708
-173.234	59.414
0.000	0.000
-76.218	163.713
-172.333	52.469
0.000	0.000
-78.759	164.149
-168.996	36.674
0.000	0.000
-75.809	89.739
-170.538	24.331
0.000	0.000
-75.677	145.523
-173.517	44.283
0.000	0.000
-77.082	111.830
-177.207	41.049
0.000	0.000
-71.467	185.626
0.000	0.000
0.000	0.000
-75.225	188.223
-171.870	42.426
0.000	1.000
-76.588	133.645
-173.660	45.277
0.000	0.000
-75.719	227.015
0.000	0.000
0.000	0.000
-74.962	69.376
-173.991	19.105
0.000	0.000
-77.093	98.489
0.000	0.000
0.000	0.000
-74.687	174.184
-172.875	48.374
0.000	0.000
-73.811	129.120
-173.211	42.297
0.000	0.000
-73.151	182.850
-173.089	66.483
0.000	0.000
-78.311	29.614
-171.870	7.071
0.000	0.000
-71.301	137.244
-172.875	40.311
0.000	0.000
-75.600	152.801
-171.870	49.497
0.000	0.000
-73.233	162.926
-173.660	54.332
0.000	0.000
-74.097	186.124
-171.573	54.589
0.000	0.000
-76.015	273.095
0.000	0.000
0.000	0.000
-75.588	184.816
-171.529	47.518
0.000	0.000
-76.120	266.790
-172.321	89.805
0.000	0.000
-74.476	112.089
-173.830	37.216
0.000	0.000
-72.031	77.795
0.000	0.000
0.000	0.000
-75.489	131.701
-174.447	36.170
0.000	0.000
-76.759	148.446
-172.962	40.807
0.000	0.000

## Sheet: 210215_ctrl_002
											3.14159	s	µm	µm/s	s	µm	s	s	Event/min	Event/min	%			Growth rate			Shrink rate			Catastrophe			Rescue
angle raw	length raw		angle pol	angle depol	angle pause	length pol	length depol	length pause	N of Cata	N of rescue	G rate	G duration	G distance	S rate	S duration	S distance	Pause dur.	Time G+S	Freq Cata	Freq Rescue	% in pause			mean	SD	N	mean	SD	N	mean	SD	N	mean	SD	N
-71.565	72.732		-71.565	-169.992	0	72.732	34.525	0	1	0	0.012	206.999	2.48399	0.203999	17.9999	3.67196	0	224.999	0.289857	0	0		second	0.00949353	0.0023744	170	0.294088	0.141697	170	0.00311678	0.00183133	170	0.0917962	0.0850468	170
-169.992	34.525		-78.44	-175.236	0	44.911	12.042	0	1	0	0.00736354	132	0.971989	0.431967	3.00033	1.29604	0	135	0.454545	0	0		minute	0.569612	0.142464	170	17.6453	8.50184	170	0.187007	0.10988	170	5.50777	5.10281	170
0.000	0.000		-81.933	-171.87	0	128.269	21.213	0	1	0	0.0051024	380.999	1.94401	0.252003	8.9998	2.26798	0	389.999	0.157481	0	0
-78.440	44.911		-78.69	-176.424	0	40.792	16.031	0	1	0	0.00720004	120	0.864002	0.576053	2.99968	1.72798	0	122.999	0.500002	0	0			Growth duration			Shrink duration
-175.236	12.042		-79.695	-172.223	0	22.361	6	0	1	0	0.00654555	66.0009	0.432013	0.263593	2.43572	0.64204	0	68.4366	0.909078	0	0			mean	SD	N	mean	SD	N		TOTAL G+S	G dur	S dur.
0.000	0.000		-76.209	-171.634	0	113.265	34.366	0	1	0	0.00883644	329.999	2.91602	0.244796	15.0003	3.67203	0	345	0.181819	0	0		sec	320.844	188.519	170	10.8937	10.0927	170	sec	56395.4	54543.5	1851.93
-81.933	128.269		-75.16	-173.418	0	121.037	26.173	0	1	0	0.00953849	350.999	3.34801	0.311997	9.00025	2.80805	0	360	0.17094	0	0		min	5.3474	3.14198	170	0.181562	0.168212	170	min	939.924	909.058	30.8655
-171.870	21.213		-78.44	-175.914	0	44.911	14.036	0	1	0	0.00736354	132	0.971989	0.503952	3.00035	1.51203	0	135	0.454545	0	0
0.000	0.000		-77.293	-173.089	0	104.561	33.242	0	1	0	0.00811756	306	2.48398	0.29701	11.9998	3.56405	0	318	0.196078	0	0			G	C	S	R				TOTAL L G+S	G length	S length
-78.690	40.792		-75.489	-172.875	0	87.801	32.249	0	1	0	0.0093176	255	2.37599	0.288	12	3.456	0	267	0.235294	0	0			0.00949353	0.00311678	0.294088	0.0917962			µm	1012.92	530.116	482.808
-176.424	16.031		-78.44	-171.027	0	44.911	19.235	0	1	0	0.00736354	132	0.971989	0.22799	9.00019	2.05196	0	141	0.454545	0	0			mean	SD	N
0.000	0.000		-75.231	0	0	113.759	0	0	0	0	0.00949077	330.002	3.13197		0	0	0	330.002	0		0		AVG Cata	0.245534	0.194783	170
-79.695	22.361		-65.056	-174.685	0	94.847	43.186	0	1	0	0.0167442	257.999	4.32	0.386966	12.0011	4.64403	0	270	0.232559	0	0		AVG Rescue	0.101909	0.509266	170
180.000	6.000		-70.396	-171.634	0	77.492	34.366	0	1	0	0.0128218	219	2.80799	0.244796	15.0003	3.67203	0	234.001	0.273972	0	0		AVG %pause	0.424379	2.93884	170			<L>	J
0.000	0.000		-72.956	-172.057	-90	143.293	43.417	1	1	0	0.0110365	410.999	4.536	0.258015	17.9991	4.64405	3	428.998	0.145986	0	0.699304								61.8535	-0.000475571
-76.209	113.265		-83.157	-172.875	0	75.538	8.062	0	1	0	0.00432014	225	0.972031	0.288	2.9999	0.863972	0	228	0.266667	0	0		Total pause duration		4.65		EVENTs
-171.634	34.366		-72.708	-173.29	0	111.018	34.234	0	1	0	0.0112072	318.001	3.56391	0.305992	12.0001	3.67195	0	330.001	0.188679	0	0		number of pause		5		Cat/min	Rescue/min	Pause/min		Cat/µm	Rescue/µm	Pause/µm
0.000	0.000		-72.35	-173.884	0	69.26	28.16	0	1	0	0.0114544	197.999	2.26797	0.335972	9.00065	3.02397	0	207	0.303032	0	0						0.162806	0.194392	0.00531958		0.279184	0.0124273	0.0049362
-75.160	121.037		-75.192	-169.875	0	44.994	14.221	0	1	0	0.00951698	130.499	1.24196	0.201593	7.5	1.51195	0	137.999	0.459774	0	0
-173.418	26.173		-72.53	-173.066	0	103.263	37.273	0	1	0	0.01133	295.5	3.34802	0.296015	13.4995	3.99604	0	308.999	0.203046	0	0		pause dur./GS duration		0.00494721	min/min
0.000	0.000		-81.634	-167.005	0	34.366	6.671	0	1	0	0.00529419	102.001	0.540012	0.155995	4.50024	0.702017	0	106.501	0.58823	0	0		N pause / GS duration		0.00531958	event/min	0.00531958	by count	0.00531958	by count			0.0049362	by count
-78.440	44.911		-75.546	-167.276	0	166.263	31.78	0	1	0	0.00927939	483.002	4.48197	0.159433	20.9991	3.34795	0	504.001	0.124223	0	0
-175.914	14.036		-74.501	-171.87	0	61.745	21.213	0	1	0	0.009983	178.499	1.78196	0.252003	8.9998	2.26798	0	187.499	0.336136	0	0		Counting
0.000	0.000		-69.944	-173.66	0	134.134	54.332	0	1	0	0.0131428	377.999	4.96797	0.32401	17.9994	5.83197	0	395.999	0.15873	0	0		Catastrophe	Rescue	Pause	N of kymos	Frames ?
-77.293	104.561		-81.754	-173.29	0	69.721	17.117	0	1	0	0.00521718	207.001	1.07996	0.305992	6.00006	1.83597	0	213.001	0.289854	0	0		148	6	5		401
-173.089	33.242		-74.197	-172.875	0	55.082	20.156	0	1	0	0.010189	159	1.62006	0.288	7.50012	2.16004	0	166.5	0.377358	0	0
0.000	0.000		-79.992	-162.474	0	34.525	9.962	0	1	0	0.00635295	101.999	0.647995	0.113997	8.99983	1.02595	0	110.999	0.588241	0	0
-75.489	87.801		-80.437	-170.134	0	93.297	11.673	0	1	0	0.00606503	276.002	1.67396	0.206996	6.00031	1.24204	0	282.002	0.21739	0	0
-172.875	32.249		-72.474	-173.418	0	59.775	26.173	0	1	0	0.0113687	171.001	1.94406	0.311997	9.00025	2.80805	0	180.001	0.350876	0	0
0.000	0.000		-74.208	-168.69	0	102.883	30.594	0	1	0	0.0101815	296.999	3.02391	0.179999	18	3.23999	0	314.999	0.202021	0	0
-78.440	44.911		-72.121	-173.66	0	32.573	9.055	0	1	0	0.0116131	92.9999	1.08002	0.32401	2.99978	0.971959	0	95.9996	0.645162	0	0
-171.027	19.235		-73.101	-170.838	0	82.565	31.401	0	1	0	0.0109369	236.999	2.59205	0.223208	14.9996	3.34804	0	251.999	0.253165	0	0
0.000	0.000		-78.009	-172.333	-90	231.041	52.469	19	1	0	0.00764612	677.999	5.18407	0.267421	21.0005	5.61599	57	699	0.0884957	0	8.15451
-75.231	113.759		-68.587	-172.405	0	109.563	45.398	0	1	0	0.0141177	306.001	4.32002	0.269987	18.0007	4.85997	0	324.001	0.196078	0	0
0.000	0.000		-77.196	-176.424	0	67.683	16.031	0	1	0	0.00818163	198	1.61996	0.576053	2.99968	1.72798	0	201	0.30303	0	0
0.000	0.000		-78.25	-175.236	0	127.675	36.125	0	1	0	0.007488	374.999	2.808	0.431967	9.00073	3.88802	0	384	0.16	0	0
-65.056	94.847		-77.905	-172.405	0	42.953	15.133	0	1	0	0.00771444	125.999	0.972009	0.269987	6.00038	1.62003	0	131.999	0.476196	0	0
-174.685	43.186		-77.661	0	0	163.783	0	0	0	0	0.00787493	479.999	3.77996		0	0	0	479.999	0		0
0.000	0.000		-74.827	-173.29	0	122.262	34.234	0	1	0	0.00976276	354	3.45602	0.305992	12.0001	3.67195	0	366	0.169492	0	0
-70.396	77.492		-66.801	-175.914	0	91.389	28.071	0	1	0	0.0154289	251.998	3.88805	0.503952	6.00049	3.02396	0	257.999	0.238097	0	0
-171.634	34.366		-76.759	-173.66	0	34.928	9.055	0	1	0	0.0084709	101.998	0.864018	0.32401	2.99978	0.971959	0	104.998	0.588245	0	0
0.000	0.000		-83.82	-173.418	0	157.918	26.173	0	1	0	0.00389813	471.001	1.83603	0.311997	9.00025	2.80805	0	480.001	0.127388	0	0
-72.956	143.293		-77.811	-171.384	0	42.628	16.688	0	1	0	0.00777623	125.001	0.972038	0.23759	7.50016	1.78196	0	132.501	0.479996	0	0
-172.057	43.417		-83.66	-171.87	0	22.638	10.607	0	1	0	0.00399987	67.4986	0.269986	0.252003	4.50011	1.13404	0	71.9988	0.888907	0	0
180.000	1.000		-73.926	-171.87	0	92.1	28.284	0	1	0	0.0103732	265.498	2.75406	0.252003	11.9997	3.02397	0	277.498	0.22599	0	0
-83.157	75.538		-74.932	-174.289	0	80.777	30.15	0	1	0	0.00969197	233.999	2.26791	0.359974	9.00075	3.24004	0	243	0.256411	0	0
-172.875	8.062		-79.461	0	0	131.214	0	0	0	0	0.00669755	387.002	2.59196		0	0	0	387.002	0		0
0.000	0.000		-76.399	-173.367	0	191.366	43.29	0	1	0	0.00870997	557.999	4.86016	0.309577	15.0012	4.64403	0	573	0.107527	0	0
-72.708	111.018		-75.964	-173.66	0	74.216	18.111	0	1	0	0.00899983	216.001	1.94397	0.32401	5.9999	1.94403	0	222	0.277777	0	0
-173.290	34.234		-74.96	-175.601	0	186.902	45.634	0	1	0	0.0096731	541.499	5.23798	0.467968	10.5006	4.91395	0	552	0.110804	0	0
0.000	0.000		-76.853	-174.428	0	70.344	20.597	0	1	0	0.00840859	205.501	1.72797	0.369013	5.99969	2.21397	0	211.5	0.29197	0	0
-72.350	69.260		-74.055	-173.29	0	43.681	17.117	0	1	0	0.0102854	126.001	1.29598	0.305992	6.00006	1.83597	0	132.001	0.476186	0	0
-173.884	28.160		-74.268	-174.644	0	73.763	32.14	0	1	0	0.0101408	213	2.16	0.383987	9.0002	3.45596	0	222	0.281691	0	0
0.000	0.000		-72.897	0	0	136.015	0	0	1	0	0.0110771	390	4.32008		0	0	0	390	0.153846		0
-75.192	44.994		-74.45	-174.958	0	119.369	34.132	0	1	0	0.0100175	344.999	3.45604	0.408036	8.99917	3.67199	0	353.998	0.173913	0	0
-169.875	14.221		-78.69	-172.405	0	76.485	15.133	0	1	0	0.00720004	224.999	1.62	0.269987	6.00038	1.62003	0	230.999	0.266668	0	0
0.000	0.000		-73.334	0	0	163.884	0	0	0	0	0.0107772	470.999	5.07607		0	0	0	470.999	0		0
-72.530	103.263		-72.277	-173.66	0	101.833	27.166	0	1	0	0.011505	291	3.34795	0.32401	8.99968	2.91598	0	299.999	0.206186	0	0
-173.066	37.273		-77.196	-176.424	0	45.122	16.031	0	1	0	0.00818163	132	1.07998	0.576053	2.99968	1.72798	0	135	0.454546	0	0
0.000	0.000		-76.459	-175.711	0	196.461	40.112	0	1	0	0.00867008	573	4.96796	0.480017	8.9996	4.31996	0	581.999	0.104712	0	0
-81.634	34.366		-74.441	-171.787	0	346.706	98.005	0	1	0	0.0100236	1002	10.0437	0.249422	42.0011	10.476	0	1044	0.0598801	0	0
-167.005	6.671		-73.882	0	0	273.761	0	0	0	0	0.0104031	789	8.20806		0	0	0	789	0		0
0.000	0.000		-80.074	-172.875	0	81.216	32.249	0	1	0	0.00629983	240.001	1.51197	0.288	12	3.456	0	252.001	0.249999	0	0
-75.546	166.263		-75.816	-173.66	0	93.862	27.166	0	1	0	0.0090987	273.002	2.48396	0.32401	8.99968	2.91598	0	282.001	0.219779	0	0
-167.276	31.780		-71.342	-168.311	0	81.271	29.614	0	1	0	0.0121559	230.999	2.80801	0.174005	17.9993	3.13198	0	248.999	0.259741	0	0
0.000	0.000		-75.964	-175.03	-90	78.339	23.087	18	1	0	0.00899983	228	2.05196	0.413978	6.00037	2.48402	54	234.001	0.263158	0	23.0769
-74.501	61.745		-77.963	0	0	139.058	0	0	0	0	0.00767633	408.002	3.13196		0	0	0	408.002	0		0
-171.870	21.213		-73.856	-176.186	0	39.56	15.033	0	1	0	0.0104208	114	1.18797	0.54001	2.99988	1.61997	0	117	0.526316	0	0
0.000	0.000		-78.44	-168.69	0	44.911	15.297	0	1	0	0.00736354	132	0.971989	0.179999	9.00002	1.61999	0	141	0.454545	0	0
-69.944	134.134		-70.821	0	0	170.461	0	0	1	0	0.0125217	483	6.04799		0	0	0	483	0.124224		0
-173.660	54.332		-68.934	-169.114	0	144.669	52.953	0	1	1	0.0138667	405.001	5.61603	0.187191	30.0014	5.61601	0	435.002	0.148148	1.99991	0
0.000	0.000		-81.573	-173.66	0	27.295	9.055	0	1	0	0.00533335	81.0009	0.432007	0.32401	2.99978	0.971959	0	84.0007	0.740732	0	0
-81.754	69.721		-73.856	-165.964	0	39.56	16.492	0	1	0	0.0104208	114	1.18797	0.144002	11.9995	1.72796	0	125.999	0.526316	0	0
-173.290	17.117		-78.559	-172.648	0	171.406	31.257	0	1	0	0.00728568	504	3.67199	0.279014	11.9994	3.348	0	516	0.119048	0	0
0.000	0.000		-74.592	-169.563	0	263.469	77.279	0	1	0	0.00992145	761.998	7.56014	0.195437	41.9983	8.20804	0	803.997	0.0787403	0	0
-74.197	55.082		-69.291	-174.958	0	87.664	34.132	0	1	0	0.0136097	246	3.34799	0.408036	8.99917	3.67199	0	254.999	0.243903	0	0
-172.875	20.156		-75.861	-172.875	0	135.093	32.249	0	1	0	0.00906862	393.001	3.56398	0.288	12	3.456	0	405.001	0.152671	0	0
0.000	0.000		-78.111	0	0	77.666	0	0	0	0	0.00757916	228	1.72805		0	0	0	228	0		0
-79.992	34.525		-72.474	-172.875	0	19.925	8.062	0	1	0	0.0113687	57.0003	0.64802	0.288	2.9999	0.863972	0	60.0002	1.05263	0	0
-162.474	9.962		-72.922	-170.707	0	173.658	55.731	0	1	1	0.0110599	498.002	5.50786	0.220007	26.9989	5.93995	0	525.001	0.120481	2.22232	0
0.000	0.000		-70.382	0	0	214.448	0	0	0	0	0.0128318	605.999	7.77604		0	0	0	605.999	0		0
-80.437	93.297		-71.565	-170.838	0	104.355	31.401	0	1	0	0.012	296.999	3.564	0.223208	14.9996	3.34804	0	311.999	0.202021	0	0
-170.134	11.673		-75.719	-173.66	0	56.754	18.111	0	1	0	0.00916356	165	1.51199	0.32401	5.9999	1.94403	0	171	0.363635	0	0
0.000	0.000		-72.204	-171.384	0	85.071	33.377	0	1	0	0.0115556	243.001	2.80802	0.23759	15.0008	3.56404	0	258.002	0.246912	0	0
-72.474	59.775		-79.891	-173.991	0	131.034	19.105	0	1	0	0.0064184	386.999	2.48392	0.342	6	2.052	0	392.999	0.155039	0	0
-173.418	26.173		-72.474	-174.56	0	39.85	21.095	0	1	0	0.0113687	114.001	1.29604	0.378023	5.99963	2.268	0	120	0.526313	0	0
0.000	0.000		-81.254	-174.289	0	105.224	30.15	0	1	0	0.00553835	312.001	1.72798	0.359974	9.00075	3.24004	0	321.002	0.192307	0	0
-74.208	102.883		-75.964	-174.289	0	53.6	20.1	0	1	0	0.00899983	155.999	1.40397	0.359974	6.0005	2.16003	0	162	0.384618	0	0
-168.690	30.594		-73.034	0	0	123.369	0	0	0	0	0.0109829	353.999	3.88796		0	0	0	353.999	0		0
0.000	0.000		-78.887	-173.29	0	57.07	17.117	0	1	0	0.0070714	168	1.18799	0.305992	6.00006	1.83597	0	174	0.357144	0	0
-72.121	32.573		-73.566	-170.074	-90	144.921	40.608	20	1	0	0.0106186	417.001	4.42797	0.205719	20.9995	4.32002	60	438.001	0.143884	0	13.6986
-173.660	9.055		-78.69	-169.695	0	40.792	11.18	0	1	0	0.00720004	120	0.864002	0.197997	5.99991	1.18796	0	125.999	0.500002	0	0
0.000	0.000		-71.764	-170.218	0	182.148	58.856	0	1	0	0.0118613	518.999	6.15599	0.208809	29.9989	6.26403	0	548.998	0.115607	0	0
-73.101	82.565		-74.539	-173.66	0	48.765	18.111	0	1	0	0.00995729	141.001	1.40399	0.32401	5.9999	1.94403	0	147.001	0.425529	0	0
-170.838	31.401		-71.565	0	0	148.627	0	0	0	0	0.012	423	5.07601		0	0	0	423	0		0
0.000	0.000		-69.624	-172.405	0	74.673	30.265	0	1	0	0.0133711	210.002	2.80796	0.269987	12.0004	3.23994	0	222.002	0.285712	0	0
-78.009	231.041		-76.49	0	0	158.382	0	0	0	0	0.00864947	461.998	3.99605		0	0	0	461.998	0		0
-172.333	52.469		-76.578	-171.87	0	90.471	21.213	0	1	0	0.00859101	264	2.26803	0.252003	8.9998	2.26798	0	273	0.227273	0	0
-90.000	19.000		-75.564	-174.094	0	104.293	29.155	0	1	0	0.00926733	303	2.80801	0.348008	8.99986	3.13203	0	312	0.19802	0	0
-68.587	109.563		-78.207	-172.011	0	185.925	57.559	0	1	0	0.00751619	546.002	4.10386	0.25651	23.9992	6.15604	0	570.001	0.10989	0	0
-172.405	45.398		-71.102	-170.961	0	117.324	44.553	0	1	0	0.0123241	333	4.10394	0.226298	20.9987	4.75197	0	353.998	0.18018	0	0
0.000	0.000		-72.181	-172.875	0	88.233	32.249	0	1	0	0.0115715	252.001	2.91603	0.288	12	3.456	0	264.001	0.238094	0	0
-77.196	67.683		-80.38	-175.236	0	59.841	12.042	0	1	0	0.00610186	176.999	1.08002	0.431967	3.00033	1.29604	0	179.999	0.338986	0	0
-176.424	16.031		-68.325	-173.29	0	83.934	34.234	0	1	0	0.0143079	233.998	3.34803	0.305992	12.0001	3.67195	0	245.998	0.256412	0	0
0.000	0.000		-81.741	-176.186	0	62.65	15.033	0	1	0	0.00522552	186.001	0.971952	0.54001	2.99988	1.61997	0	189.001	0.322579	0	0
-78.250	127.675		-76.477	-169.479	0	243.758	71.197	0	1	0	0.00865811	711	6.15593	0.193842	39.0008	7.56	0	750.001	0.0843882	0	0
-175.236	36.125		-82.235	-173.66	0	66.611	18.111	0	1	0	0.00490898	198.001	0.971982	0.32401	5.9999	1.94403	0	204.001	0.303029	0	0
0.000	0.000		-72.784	-168.887	0	148.661	57.07	0	1	0	0.0111549	426.001	4.75199	0.183273	32.9998	6.04799	0	459.001	0.140845	0	0
-77.905	42.953		-78.589	0	0	111.198	0	0	0	0	0.00726606	327	2.376		0	0	0	327	0		0
-172.405	15.133		-70.244	-172.011	0	150.881	57.559	0	1	0	0.0129296	426.001	5.50801	0.25651	23.9992	6.15604	0	450	0.140845	0	0
0.000	0.000		-75.677	-172.504	0	145.523	38.328	0	1	0	0.00919167	422.999	3.88807	0.273594	15.0005	4.10405	0	437.999	0.141844	0	0
-77.661	163.783		-72.874	0	0	179.981	0	0	1	0	0.0110929	516.002	5.72397		0	0	0	516.002	0.116279		0
0.000	0.000		-71.565	-172.093	0	72.732	36.346	0	1	0	0.012	206.999	2.48399	0.259205	14.9999	3.88805	0	221.999	0.289857	0	0
0.000	0.000		-75.256	-176.82	0	39.294	18.028	0	1	0	0.00947397	114	1.08004	0.647965	3.0002	1.94403	0	117.001	0.526314	0	0
-74.827	122.262		-72.597	-170.789	0	140.428	37.483	0	1	0	0.0112838	402	4.53608	0.222	17.9998	3.99597	0	419.999	0.149254	0	0
-173.290	34.234		-76.759	0	0	69.857	0	0	0	0	0.0084709	204	1.72806		0	0	0	204	0		0
0.000	0.000		-75.231	-175.236	0	113.759	36.125	0	1	0	0.00949077	330.002	3.13197	0.431967	9.00073	3.88802	0	339.002	0.181817	0	0
-66.801	91.389		-71.884	-170.248	0	170.449	64.938	0	1	0	0.0117777	485.999	5.72397	0.209464	32.9984	6.91196	0	518.997	0.123457	0	0
-175.914	28.071		-82.875	-167.905	0	48.374	14.318	0	1	0	0.00449999	144.001	0.648005	0.167996	9.00029	1.51202	0	153.002	0.416663	0	0
0.000	0.000		-70.974	-173.367	0	122.703	43.29	0	1	0	0.0124141	347.999	4.32009	0.309577	15.0012	4.64403	0	363.001	0.172414	0	0
-76.759	34.928		-79.963	-173.884	0	114.756	28.16	0	1	0	0.00637174	338.999	2.16002	0.335972	9.00065	3.02397	0	348	0.176992	0	0
-173.660	9.055		-71.811	-173.454	0	221.045	61.4	0	1	0	0.0118285	629.999	7.45197	0.313728	20.999	6.58797	0	650.998	0.0952382	0	0
0.000	0.000		-75.426	-171.87	0	51.662	21.213	0	1	0	0.00935985	149.999	1.40397	0.252003	8.9998	2.26798	0	158.999	0.400002	0	0
-83.820	157.918		-78.636	-172.614	0	208.079	54.452	0	1	0	0.00723533	611.999	4.42802	0.277716	20.9999	5.83202	0	632.999	0.0980394	0	0
-173.418	26.173		-73.093	0	0	237.255	0	0	0	0	0.0109424	681.001	7.45181		0	0	0	681.001	0		0
0.000	0.000		-73.179	-171.573	0	179.689	54.589	0	1	0	0.0108834	516.002	5.61588	0.242999	23.9999	5.83196	0	540.002	0.116279	0	0
-77.811	42.628		-69.864	0	0	95.859	0	0	0	0	0.0131998	270	3.56394		0	0	0	270	0		0
-171.384	16.688		-75.174	-170.538	0	35.171	6.083	0	1	0	0.00952908	102	0.971969	0.216007	3.00002	0.648026	0	105	0.588234	0	0
0.000	0.000		-76.849	0	0	219.764	0	0	0	0	0.00841124	642.001	5.40003		0	0	0	642.001	0		0
-83.660	22.638		-72.731	-169.472	0	404.223	114.935	0	1	1	0.0111914	1158	12.9597	0.19371	63.0014	12.204	0	1221.01	0.0518133	0.95236	0
-171.870	10.607		-74.055	-173.991	0	65.521	19.105	0	1	0	0.0102854	189	1.94395	0.342	6	2.052	0	195	0.31746	0	0
0.000	0.000		-76.675	-176.424	0	39.051	16.031	0	1	0	0.00852662	113.999	0.972027	0.576053	2.99968	1.72798	0	116.999	0.52632	0	0
-73.926	92.100		-72.15	-169.695	0	61.984	22.361	0	1	0	0.011593	177.001	2.05197	0.197997	12.0003	2.37603	0	189.001	0.338982	0	0
-171.870	28.284		-75.606	-170.272	0	116.662	35.511	0	1	0	0.0092392	339	3.13209	0.209991	18.001	3.78004	0	357.001	0.176991	0	0
0.000	0.000		-72.824	-168.69	0	57.567	25.495	0	1	0	0.0111273	164.999	1.836	0.179999	15	2.69999	0	179.999	0.363639	0	0
-74.932	80.777		-71.222	-168.69	0	52.811	20.396	0	1	0	0.01224	150	1.836	0.179999	12	2.15999	0	162	0.4	0	0
-174.289	30.150		-78.326	-172.405	0	123.556	30.265	10	1	0	0.0074382	363.001	2.70007	0.269987	12.0004	3.23994	0	375.001	0.165289	0	0
0.000	0.000		-71.977	-172.2	0	352.287	73.682	0	1	1	0.0117131	1005	11.7717	0.262806	29.9994	7.88403	0	1035	0.0597013	2.00004	0
-79.461	131.214		-72.031	-171.87	0	38.897	14.142	0	1	0	0.0116756	110.999	1.29598	0.252003	5.99987	1.51199	0	116.999	0.540544	0	0
0.000	0.000		-81.254	-172.875	0	144.682	24.187	0	1	0	0.00553835	428.999	2.37595	0.288	9.00006	2.59202	0	437.999	0.13986	0	0
0.000	0.000		-72.734	-172.147	0	77.492	29.275	0	1	1	0.0111893	222	2.48403	0.26101	11.9997	3.13205	0	234	0.27027	5.00012	0
-76.399	191.366		-73.94	0	-90	137.361	0	35	0	0	0.0103636	396	4.10401		0	0	105	396	0		26.5151
-173.367	43.290		-74.65	-172.304	0	105.773	37.336	0	1	0	0.00988225	305.999	3.02396	0.266402	14.9998	3.99597	0	320.999	0.196079	0	0
0.000	0.000		-76.464	-176.186	0	55.543	15.033	0	1	0	0.00866675	162.001	1.40402	0.54001	2.99988	1.61997	0	165	0.370369	0	0
-75.964	74.216		-77.506	0	0	180.269	0	0	0	0	0.00797704	528	4.21188		0	0	0	528	0		0
-173.660	18.111		-79.028	-174.094	0	99.825	29.155	0	1	0	0.00697943	294.001	2.05196	0.348008	8.99986	3.13203	0	303.001	0.204081	0	0
0.000	0.000		-74.745	0	0	45.607	0	0	1	0	0.00981809	132	1.29599		0	0	0	132	0.454545		0
-74.960	186.902		-72.607	0	0	86.977	0	0	0	0	0.0112769	249	2.80795		0	0	0	249	0		0
-175.601	45.634		-73.301	-170.91	0	177.485	50.636	0	1	0	0.0107998	510	5.50792	0.225007	23.9993	5.40001	0	533.999	0.117647	0	0
0.000	0.000		-74.745	-162.897	0	22.804	13.601	0	1	0	0.00981809	66.0015	0.648009	0.116998	11.9998	1.40395	0	78.0012	0.909071	0	0
-76.853	70.344		-70.821	-171.529	0	121.758	47.518	0	1	0	0.0125217	345	4.32	0.241718	20.9995	5.07596	0	366	0.173913	0	0
-174.428	20.597		-73.61	-169.216	0	70.88	21.378	0	1	0	0.0105885	203.999	2.16005	0.189005	11.9999	2.26805	0	215.999	0.294119	0	0
0.000	0.000		-76.373	0	0	169.779	0	0	0	0	0.00872727	494.999	4.31999		0	0	0	494.999	0		0
-74.055	43.681		-80.218	-172.235	0	88.284	22.204	0	1	0	0.00620663	261.001	1.61994	0.264005	8.99997	2.37604	0	270.001	0.229884	0	0
-173.290	17.117		-73.996	0	0	134.201	0	0	0	0	0.0103255	386.999	3.99598		0	0	0	386.999	0		0
0.000	0.000		-75.964	-169.875	0	37.108	28.443	0	1	0	0.00899983	108	0.971985	0.201593	15.0005	3.024	0	123.001	0.555554	0	0
-74.268	73.763		-75.579	-170.538	0	108.416	36.497	0	1	0	0.00925729	315	2.91605	0.216007	17.9996	3.88805	0	333	0.190476	0	0
-174.644	32.140		-74.1	-172.03	0	171.563	50.488	0	1	0	0.0102549	494.998	5.07614	0.25713	21.0012	5.40004	0	515.999	0.121213	0	0
0.000	0.000		-71.169	-169.778	0	182.784	61.984	0	1	0	0.0122771	519.001	6.37185	0.19964	32.9995	6.58802	0	552.001	0.115607	0	0
-72.897	136.015		-75.899	-175.156	0	213.431	59.211	0	1	0	0.00904323	621	5.61585	0.4248	14.9999	6.37195	0	635.999	0.0966184	0	0
0.000	0.000		-75.01	-172.147	0	189.447	58.549	0	1	1	0.00963943	549.001	5.29206	0.26101	23.999	6.26399	0	573	0.109289	2.5001	0
0.000	0.000		-78.541	-171.87	0	75.505	21.213	0	1	0	0.00729745	222	1.62004	0.252003	8.9998	2.26798	0	231	0.27027	0	0
-74.450	119.369		-72.759	-170.218	0	182.187	58.856	0	1	0	0.0111721	522.002	5.83186	0.208809	29.9989	6.26403	0	552.001	0.114942	0	0
-174.958	34.132		-79.261	-171.254	0	118.068	26.306	0	1	0	0.00682765	348.001	2.37603	0.234004	11.9998	2.80801	0	360	0.172414	0	0
0.000	0.000		-74.346	-170.981	0	189.011	63.789	0	1	0	0.010088	546.001	5.50804	0.226808	29.9991	6.80404	0	576	0.10989	0	0
-78.690	76.485		-75.362	0	0	138.495	0	0	0	0	0.00940279	401.999	3.77992		0	0	0	401.999	0		0
-172.405	15.133		-81.027	-174.289	0	76.942	20.1	0	1	0	0.00568445	228.001	1.29606	0.359974	6.0005	2.16003	0	234.002	0.263157	0	0
0.000	0.000		-80.248	13.392	0	64.938	21.587	0	1	0	0.00618722	191.999	1.18794	0.151206	-14.9994	-2.268	0	177	0.312502	0	0
-73.334	163.884		-75.256	-174.56	0	117.881	42.19	0	1	0	0.00947397	341.998	3.24009	0.378023	11.9993	4.536	0	353.998	0.175439	0	0
0.000	0.000		-71.313	-170.707	0	143.569	55.731	0	1	0	0.0121762	408.001	4.96792	0.220007	26.9989	5.93995	0	435	0.147058	0	0
0.000	0.000
-72.277	101.833
-173.660	27.166
0.000	0.000
-77.196	45.122
-176.424	16.031
0.000	0.000
-76.459	196.461
-175.711	40.112
0.000	0.000
-74.441	346.706
-171.787	98.005
0.000	0.000
-73.882	273.761
0.000	0.000
0.000	0.000
-80.074	81.216
-172.875	32.249
0.000	0.000
-75.816	93.862
-173.660	27.166
0.000	0.000
-71.342	81.271
-168.311	29.614
0.000	0.000
-75.964	78.339
-175.030	23.087
-90.000	18.000
-77.963	139.058
0.000	0.000
0.000	0.000
-73.856	39.560
-176.186	15.033
0.000	0.000
-78.440	44.911
-168.690	15.297
0.000	0.000
-70.821	170.461
0.000	0.000
0.000	0.000
-68.934	144.669
-169.114	52.953
0.000	0.000
-81.573	27.295
-173.660	9.055
0.000	0.000
-73.856	39.560
-165.964	16.492
0.000	0.000
-78.559	171.406
-172.648	31.257
0.000	0.000
-74.592	263.469
-169.563	77.279
0.000	0.000
-69.291	87.664
-174.958	34.132
0.000	0.000
-75.861	135.093
-172.875	32.249
0.000	0.000
-78.111	77.666
0.000	0.000
0.000	0.000
-72.474	19.925
-172.875	8.062
0.000	0.000
-72.922	173.658
-170.707	55.731
0.000	0.000
-70.382	214.448
0.000	0.000
0.000	0.000
-71.565	104.355
-170.838	31.401
0.000	0.000
-75.719	56.754
-173.660	18.111
0.000	0.000
-72.204	85.071
-171.384	33.377
0.000	0.000
-79.891	131.034
-173.991	19.105
0.000	0.000
-72.474	39.850
-174.560	21.095
0.000	0.000
-81.254	105.224
-174.289	30.150
0.000	0.000
-75.964	53.600
-174.289	20.100
0.000	0.000
-73.034	123.369
0.000	0.000
0.000	0.000
-78.887	57.070
-173.290	17.117
0.000	0.000
-73.566	144.921
-170.074	40.608
-90.000	20.000
-78.690	40.792
-169.695	11.180
0.000	0.000
-71.764	182.148
-170.218	58.856
0.000	0.000
-74.539	48.765
-173.660	18.111
0.000	0.000
-71.565	148.627
0.000	0.000
0.000	0.000
-69.624	74.673
-172.405	30.265
0.000	0.000
-76.490	158.382
0.000	0.000
0.000	0.000
-76.578	90.471
-171.870	21.213
0.000	0.000
-75.564	104.293
-174.094	29.155
0.000	0.000
-78.207	185.925
-172.011	57.559
0.000	0.000
-71.102	117.324
-170.961	44.553
0.000	0.000
-72.181	88.233
-172.875	32.249
0.000	0.000
-80.380	59.841
-175.236	12.042
0.000	0.000
-68.325	83.934
-173.290	34.234
0.000	0.000
-81.741	62.650
-176.186	15.033
0.000	0.000
-76.477	243.758
-169.479	71.197
0.000	0.000
-82.235	66.611
-173.660	18.111
0.000	0.000
-72.784	148.661
-168.887	57.070
0.000	0.000
-78.589	111.198
0.000	0.000
0.000	0.000
-70.244	150.881
-172.011	57.559
0.000	0.000
-75.677	145.523
-172.504	38.328
0.000	0.000
-72.874	179.981
0.000	0.000
0.000	0.000
-71.565	72.732
-172.093	36.346
0.000	0.000
-75.256	39.294
-176.820	18.028
0.000	0.000
-72.597	140.428
-170.789	37.483
0.000	0.000
-76.759	69.857
0.000	0.000
0.000	0.000
-75.231	113.759
-175.236	36.125
0.000	0.000
-71.884	170.449
-170.248	64.938
0.000	0.000
-82.875	48.374
-167.905	14.318
0.000	0.000
-70.974	122.703
-173.367	43.290
0.000	0.000
-79.963	114.756
-173.884	28.160
0.000	0.000
-71.811	221.045
-173.454	61.400
0.000	0.000
-75.426	51.662
-171.870	21.213
0.000	0.000
-78.636	208.079
-172.614	54.452
0.000	0.000
-73.093	237.255
0.000	0.000
0.000	0.000
-73.179	179.689
-171.573	54.589
0.000	0.000
-69.864	95.859
0.000	0.000
0.000	0.000
-75.174	35.171
-170.538	6.083
0.000	0.000
-76.849	219.764
0.000	0.000
0.000	0.000
-72.731	404.223
-169.472	114.935
0.000	0.000
-74.055	65.521
-173.991	19.105
0.000	0.000
-76.675	39.051
-176.424	16.031
0.000	0.000
-72.150	61.984
-169.695	22.361
0.000	0.000
-75.606	116.662
-170.272	35.511
0.000	0.000
-72.824	57.567
-168.690	25.495
0.000	0.000
-71.222	52.811
-168.690	20.396
0.000	0.000
-78.326	123.556
-172.405	30.265
-165.964	28.862
-71.977	352.287
-172.200	73.682
0.000	0.000
-72.031	38.897
-171.870	14.142
0.000	0.000
-81.254	144.682
-172.875	24.187
0.000	0.000
-72.734	77.492
-172.147	29.275
0.000	0.000
-73.940	137.361
0.000	0.000
-90.000	35.000
-74.650	105.773
-172.304	37.336
0.000	0.000
-76.464	55.543
-176.186	15.033
0.000	0.000
-77.506	180.269
0.000	0.000
0.000	0.000
-79.028	99.825
-174.094	29.155
0.000	0.000
-74.745	45.607
0.000	0.000
-171.870	21.213
-72.607	86.977
0.000	0.000
0.000	0.000
-73.301	177.485
-170.910	50.636
0.000	0.000
-74.745	22.804
-162.897	13.601
0.000	0.000
-70.821	121.758
-171.529	47.518
0.000	0.000
-73.610	70.880
-169.216	21.378
0.000	0.000
-76.373	169.779
0.000	0.000
0.000	0.000
-80.218	88.284
-172.235	22.204
0.000	0.000
-73.996	134.201
0.000	0.000
0.000	0.000
-75.964	37.108
-169.875	28.443
0.000	0.000
-75.579	108.416
-170.538	36.497
0.000	0.000
-74.100	171.563
-172.030	50.488
0.000	0.000
-71.169	182.784
-169.778	61.984
0.000	0.000
-75.899	213.431
-175.156	59.211
0.000	0.000
-75.010	189.447
-172.147	58.549
0.000	0.000
-78.541	75.505
-171.870	21.213
0.000	0.000
-72.759	182.187
-170.218	58.856
0.000	0.000
-79.261	118.068
-171.254	26.306
0.000	0.000
-74.346	189.011
-170.981	63.789
0.000	0.000
-75.362	138.495
0.000	0.000
0.000	0.000
-81.027	76.942
-174.289	20.100
0.000	0.000
-80.248	64.938
13.392	21.587
0.000	0.000
-75.256	117.881
-174.560	42.190
0.000	0.000
-71.313	143.569
-170.707	55.731
0.000	0.000

## Sheet: 210302_CTRL_12uM_3s_001
											3.14159	s	µm	µm/s	s	µm	s	s	Event/min	Event/min	%			Growth rate			Shrink rate			Catastrophe			Rescue
angle raw	length raw		angle pol	angle depol	angle pause	length pol	length depol	length pause	N of Cata	N of rescue	G rate	G duration	G distance	S rate	S duration	S distance	Pause dur.	Time G+S	Freq Cata	Freq Rescue	% in pause			mean	SD	N	mean	SD	N	mean	SD	N	mean	SD	N
-73.413	49.041		-73.413	-170.134	0	49.041	23.345	0	1	0	0.0107232	141.001	1.51198	0.206996	12.0001	2.48397	0	153.001	0.425529	0	0		second	0.00859159	0.0023872	314	0.3034	0.164089	314	0.00316132	0.00218005	314	0.0835647	0.0762396	314
-170.134	23.345		-77.184	-173.346	0	216.391	60.407	0	1	0	0.00818956	633	5.184	0.308591	20.9987	6.48001	0	653.999	0.0947867	0	0		minute	0.515495	0.143232	314	18.204	9.84531	314	0.189679	0.130803	314	5.01388	4.57438	314
0.000	0.000		-81.027	-173.157	0	96.177	25.179	0	1	0	0.00568445	285	1.62007	0.29999	9.00017	2.69996	0	294	0.210526	0	0
-77.184	216.391		-77.005	-168.69	0	26.683	10.198	0	1	0	0.00830794	77.9989	0.648011	0.179999	6.00001	1.08	0	83.9989	0.769241	0	0			Growth duration			Shrink duration
-173.346	60.407		-75.964	-172.057	0	164.924	43.417	0	1	0	0.00899983	480	4.31992	0.258015	17.9991	4.64405	0	497.999	0.125	0	0			mean	SD	N	mean	SD	N		TOTAL G+S	G dur	S dur.
0.000	0.000		-75.489	-174.144	0	43.9	19.602	0	1	0	0.0093176	127.499	1.18798	0.351	5.9999	2.10597	0	133.499	0.470593	0	0		sec	316.323	218.136	314	11.9668	10.9178	314	sec	103083	99325.5	3757.57
-81.027	96.177		-75.964	-170.789	0	55.662	18.742	0	1	0	0.00899983	162	1.45798	0.222	9.00014	1.99804	0	171.001	0.370369	0	0		min	5.27205	3.63561	314	0.199446	0.181963	314	min	1718.05	1655.42	62.6261
-173.157	25.179		-82.235	-171.87	0	99.916	21.213	0	1	0	0.00490898	296.999	1.45797	0.252003	8.9998	2.26798	0	305.999	0.202021	0	0
0.000	0.000		-78.964	0	0	143.657	0	0	0	0	0.00702116	423.001	2.96996		0	0	0	423.001	0		0			G	C	S	R				TOTAL L G+S	G length	S length
-77.005	26.683		-75.754	-170.838	0	99.562	31.401	0	1	0	0.00914015	289.501	2.64608	0.223208	14.9996	3.34804	0	304.5	0.207253	0	0			0.00859159	0.00316132	0.3034	0.0835647			µm	1840.16	872.261	967.897
-168.690	10.198		-76.633	-172.093	0	51.906	18.173	0	1	0	0.00855449	151.499	1.296	0.259205	7.49994	1.94402	0	158.999	0.396041	0	0			mean	SD	N
0.000	0.000		-74.846	-173.157	0	24.865	12.59	0	1	0	0.00974994	72.0011	0.702007	0.29999	4.50026	1.35003	0	76.5013	0.833321	0	0		AVG Cata	0.30406	0.300107	314
-75.964	164.924		-82.321	-170.218	0	44.903	14.714	0	1	0	0.00485395	133.501	0.648008	0.208809	7.49972	1.56601	0	141.001	0.449435	0	0		AVG Rescue	0.289545	1.91222	314
-172.057	43.417		-80.242	0	0	79.652	0	0	0	0	0.0061911	235.499	1.458		0	0	0	235.499	0		0		AVG %pause	0.281014	2.48695	314			<L>	J
0.000	0.000		-76.407	-167.386	0	251.032	73.268	0	1	0	0.00870465	732.002	6.37183	0.16087	48.0012	7.72195	0	780.003	0.081967	0	0								10.8076	-0.00278107
-75.489	43.900		-70.942	0	0	116.379	0	0	0	0	0.0124366	330	4.10407		0	0	0	330	0		0		Total pause duration		5.6939		EVENTs
-174.144	19.602		-79.778	-169.563	-90	30.992	19.32	1	1	0	0.00649169	91.5002	0.593992	0.195437	10.4997	2.05204	3	102	0.655736	0	2.94118		number of pause		8		Cat/min	Rescue/min	Pause/min		Cat/µm	Rescue/µm	Pause/µm
0.000	0.000		-80.478	-174.726	0	157.166	32.638	0	1	0	0.00603854	465.002	2.80793	0.389992	9.00013	3.50998	0	474.002	0.129032	0	0						0.166725	0.14371	0.00465644		0.316419	0.00929851	0.00434745
-75.964	55.662		-81.769	0	0	160.655	0	0	0	0	0.00520756	477	2.48401		0	0	0	477	0		0
-170.789	18.742		-74.249	-169.992	-90	40.522	17.263	0	1	0	0.0101537	117.001	1.188	0.203999	9.00019	1.83603	0	126.001	0.512815	0	0		pause dur./GS duration		0.00331416	min/min
0.000	0.000		-69.274	-167.471	0	39.56	18.439	0	1	0	0.0136219	110.999	1.51203	0.161997	12.0001	1.94399	0	123	0.540543	0	0		N pause / GS duration		0.00465644	event/min	0.00465644	by count	0.00465644	by count			0.00434745	by count
-82.235	99.916		-80.134	-167.005	0	23.345	13.342	0	1	0	0.00626099	68.9993	0.432004	0.155995	9.00049	1.40403	0	77.9998	0.869574	0	0
-171.870	21.213		-71.4	-175.333	0	109.731	49.163	0	1	0	0.0121153	311.999	3.77997	0.440986	12.0004	5.292	0	323.999	0.192308	0	0		Counting
0.000	0.000		-72.759	-173.224	0	106.276	50.855	0	1	0	0.0111721	304.502	3.40193	0.302984	18.0008	5.45398	0	322.503	0.197043	0	0		Catastrophe	Rescue	Pause	N of kymos	Frames ?
-78.964	143.657		-74.989	-172.569	0	92.662	34.792	0	1	1	0.00965357	268.5	2.59199	0.276015	13.4992	3.72598	0	281.999	0.223464	4.44472	0		276	9	8		401
0.000	0.000		-71.565	-172.875	0	50.596	36.28	0	1	0	0.012	143.999	1.72799	0.288	13.4999	3.88798	0	157.499	0.41667	0	0
0.000	0.000		-78.44	-175.236	0	22.456	12.042	0	1	0	0.00736354	66.0015	0.486005	0.431967	3.00033	1.29604	0	69.0018	0.909071	0	0
-75.754	99.562		-73.217	-174.094	0	32.901	14.577	0	1	0	0.0108574	94.4988	1.02601	0.348008	4.49978	1.56596	0	98.9985	0.634929	0	0
-170.838	31.401		-75.964	-174.56	0	53.6	21.095	0	1	0	0.00899983	155.999	1.40397	0.378023	5.99963	2.268	0	161.999	0.384618	0	0
0.000	0.000		-73.821	-168.056	90	168.68	53.151	0	1	0	0.0104446	485.999	5.07609	0.170184	32.9997	5.61603	0	518.998	0.123457	0	0
-76.633	51.906		-74.624	-171.027	0	82.97	19.235	0	1	0	0.00989982	240.001	2.37597	0.22799	9.00019	2.05196	0	249.001	0.249999	0	0
-172.093	18.173		-70.684	-169.38	0	154.179	56.976	0	1	0	0.0126183	436.5	5.50789	0.191993	31.5011	6.04801	0	468.001	0.137457	0	0
0.000	0.000		-73.97	-172.126	0	139.421	47.447	0	1	0	0.0103432	402	4.15798	0.260305	19.5	5.07596	0	421.5	0.149254	0	0
-74.846	24.865		-83.868	-170.218	0	60.848	14.714	0	1	0	0.00386762	181.5	0.701973	0.208809	7.49972	1.56601	0	188.999	0.330579	0	0
-173.157	12.590		-78.301	-171.416	0	101.1	26.8	0	1	0	0.00745458	296.999	2.21401	0.238489	12.0004	2.86198	0	309	0.202021	0	0
0.000	0.000		-73.828	-175.101	0	52.06	17.564	0	1	0	0.0104399	150	1.56598	0.420008	4.49987	1.88998	0	154.5	0.4	0	0
-82.321	44.903		-73.502	0	0	149.661	0	0	0	0	0.0106623	430.498	4.59011		0	0	0	430.498	0		0
-170.218	14.714		-83.946	-171.87	0	33.185	3.536	0	1	0	0.00381806	98.9998	0.377987	0.252003	1.50018	0.37805	0	100.5	0.606062	0	0
0.000	0.000		-78.043	-173.367	0	86.885	21.645	0	1	0	0.00762379	255	1.94407	0.309577	7.50059	2.32201	0	262.5	0.235294	0	0
-80.242	79.652		-79.234	-176.987	0	72.272	19.026	0	1	0	0.00684522	213	1.45803	0.683951	3.00016	2.05197	0	216	0.281691	0	0
0.000	0.000		-80.43	-169.461	0	174.428	43.738	0	1	0	0.00606955	516.002	3.1319	0.193503	23.9997	4.64402	0	540.001	0.116279	0	0
0.000	0.000		-73.171	0	0	169.248	0	0	0	0	0.0108889	485.999	5.29201		0	0	0	485.999	0		0
-76.407	251.032		-74.65	-176.309	0	105.773	31.064	0	1	0	0.00988225	305.999	3.02396	0.558058	5.99929	3.34795	0	311.998	0.196079	0	0
-167.386	73.268		-78.21	-173.991	0	163.959	38.21	0	1	0	0.00751423	481.5	3.6181	0.342	12	4.10401	0	493.5	0.124611	0	0
0.000	0.000		-75.192	-174.898	0	89.989	28.111	0	1	0	0.00951698	261.001	2.48394	0.403213	7.49965	3.02396	0	268.5	0.229884	0	0
-70.942	116.379		-79.563	-169.216	0	19.32	10.689	0	1	1	0.00663126	57.001	0.377989	0.189005	5.99996	1.13402	0	63.001	1.05261	10.0001	0
0.000	0.000		-78.366	-172.569	0	34.713	11.597	0	1	0	0.007412	102	0.756021	0.276015	4.49959	1.24196	0	106.499	0.588238	0	0
0.000	0.000		-77.747	-173.454	0	101.308	30.7	0	1	0	0.00781833	297.001	2.32205	0.313728	10.4995	3.29398	0	307.5	0.20202	0	0
-79.778	30.992		-78.749	-172.747	0	94.822	27.722	0	1	0	0.00716149	278.999	1.99805	0.282865	10.4998	2.97002	0	289.499	0.215054	0	0
-169.563	19.320		-72.387	-173.089	0	33.049	16.621	0	1	0	0.0114289	94.4992	1.08002	0.29701	5.99989	1.78203	0	100.499	0.634926	0	0
-90.000	0.500		-75.624	-175.061	0	122.846	40.651	0	1	0	0.00922715	356.998	3.29408	0.416589	10.4996	4.37401	0	367.498	0.168068	0	0
-80.478	157.166		-75.155	-174.472	90	42.933	15.572	0	1	0	0.00954186	124.5	1.18796	0.371968	4.50025	1.67395	0	129	0.481928	0	0
-174.726	32.638		-80.054	-172.801	0	107.11	47.877	0	1	0	0.00631279	316.501	1.998	0.285009	17.9993	5.12995	0	334.5	0.189573	0	0
0.000	0.000		-77.045	-171.87	0	269.869	60.104	0	1	0	0.00828147	789	6.53408	0.252003	25.4996	6.42599	0	814.499	0.0760457	0	0
-81.769	160.655		-80.074	-172.648	0	60.912	15.628	0	1	0	0.00629983	180.001	1.13398	0.279014	5.9995	1.67395	0	186	0.333332	0	0
0.000	0.000		-65.933	0	0	138.544	0	0	0	0	0.0160787	379.501	6.10188		0	0	0	379.501	0		0
0.000	0.000		-74.811	-172.171	0	114.5	40.376	0	1	0	0.00977355	331.5	3.23994	0.261821	16.4997	4.31996	0	348	0.180995	0	0
-74.249	40.522		-75.411	-172.235	0	75.432	22.204	0	1	0	0.00936991	219	2.05201	0.264005	8.99997	2.37604	0	228	0.273973	0	0
-169.992	17.263		-70.828	-172.147	0	159.866	58.549	0	1	0	0.0125168	452.998	5.67009	0.26101	23.999	6.26399	0	476.997	0.132451	0	0
-90.000	1.000		-76.264	-173.66	0	46.325	18.111	0	1	0	0.00879981	135	1.18798	0.32401	5.9999	1.94403	0	141	0.444443	0	0
-69.274	39.560		-78.015	-172.405	0	182.989	45.398	0	1	0	0.00764218	537.001	4.10386	0.269987	18.0007	4.85997	0	555.001	0.111732	0	0
-167.471	18.439		-73.301	0	0	62.642	0	0	0	0	0.0107998	180.001	1.94398		0	0	0	180.001	0		0
0.000	0.000		-74.401	-168.887	0	204.534	57.07	0	1	0	0.0100507	591.001	5.93998	0.183273	32.9998	6.04799	0	624.001	0.101523	0	0
-80.134	23.345		-77.661	-172.093	0	98.27	36.346	0	1	0	0.00787493	288	2.26798	0.259205	14.9999	3.88805	0	303	0.208333	0	0
-167.005	13.342		-73.773	-172.875	0	139.56	48.374	0	1	0	0.0104774	402.001	4.21191	0.288	18.0001	5.18405	0	420.001	0.149253	0	0
0.000	0.000		-77.196	-171.573	0	90.244	27.295	0	1	0	0.00818163	264	2.15995	0.242999	12.0002	2.91603	0	276	0.227273	0	0
-71.400	109.731		-74.311	-167.33	0	214.491	66.11	0	1	0	0.0101117	619.5	6.26419	0.160135	43.5008	6.96602	0	663	0.0968524	0	0
-175.333	49.163		-78.69	-171.254	0	30.594	13.153	0	1	0	0.00720004	89.9996	0.648001	0.234004	5.99991	1.40401	0	95.9995	0.666669	0	0
0.000	0.000		-74.982	-170.538	0	127.35	36.497	0	1	0	0.00965828	369.001	3.56392	0.216007	17.9996	3.88805	0	387	0.162601	0	0
-72.759	106.276		-73.706	-167.905	0	135.44	42.953	0	1	0	0.010523	390	4.10399	0.167996	27.0002	4.53595	0	417	0.153846	0	0
-173.224	50.855		-71.697	-171.87	0	136.927	49.497	0	1	0	0.0119079	389.999	4.64409	0.252003	20.9995	5.29195	0	410.999	0.153846	0	0
0.000	0.000		-75.466	-176.186	0	27.893	15.033	0	1	0	0.00933302	81.0012	0.755986	0.54001	2.99988	1.61997	0	84.0011	0.74073	0	0
-74.989	92.662		-80.754	-172.405	0	43.566	15.133	0	1	0	0.00586039	129	0.75599	0.269987	6.00038	1.62003	0	135	0.465117	0	0
-172.569	34.792		-76.608	-173.729	0	302.218	91.548	0	1	0	0.00857109	882	7.55971	0.327604	29.9997	9.82802	0	912	0.0680272	0	0
0.000	0.000		-79.563	-171.469	0	38.639	20.224	0	1	0	0.00663126	113.999	0.755959	0.239993	9.00036	2.16003	0	122.999	0.52632	0	0
-71.565	50.596		-73.465	-166.799	0	267.043	83.199	0	1	0	0.0106876	767.999	8.20808	0.153475	56.9999	8.74805	0	824.999	0.0781251	0	0
-172.875	36.280		-75.256	0	0	58.941	0	0	0	0	0.00947397	171.001	1.62006		0	0	0	171.001	0		0
0.000	0.000		-78.111	-174.806	0	38.833	11.045	0	1	0	0.00757916	114	0.864025	0.396032	2.99965	1.18796	0	117	0.526316	0	0
-78.440	22.456		-75.895	-171.87	0	201.062	56.569	0	1	0	0.00904591	585	5.29186	0.252003	23.9999	6.04805	0	609	0.102564	0	0
-175.236	12.042		-73.009	-168.69	0	37.643	15.297	0	1	0	0.0110001	108	1.18801	0.179999	9.00002	1.61999	0	117	0.555557	0	0
0.000	0.000		-75.712	0	0	303.9	0	0	0	0	0.00916825	883.499	8.10014		0	0	0	883.499	0		0
-73.217	32.901		-74.667	-176.309	0	64.288	31.064	0	1	0	0.00987077	185.999	1.83595	0.558058	5.99929	3.34795	0	191.998	0.322582	0	0
-174.094	14.577		-78.729	-172.569	-90	286.526	69.584	15	1	0	0.00717456	843	6.04816	0.276015	26.9983	7.45196	45	869.998	0.0711744	0	5.17242
0.000	0.000		-77.905	-172.875	0	14.318	16.125	0	1	0	0.00771444	42.0005	0.32401	0.288	6.00017	1.72805	0	48.0007	1.42855	0	0
-75.964	53.600		-74.249	-170.538	0	202.608	66.91	0	1	0	0.0101537	585.001	5.93994	0.216007	32.9987	7.12797	0	617.999	0.102564	0	0
-174.560	21.095		-71.061	-172.569	0	107.838	46.39	0	1	0	0.0123529	306	3.78	0.276015	17.9992	4.96804	0	324	0.196078	0	0
0.000	0.000		-72.163	0	0	212.2	0	0	0	0	0.011584	606	7.01989		0	0	0	606	0		0
-73.821	168.680		-75.964	-176.055	0	74.216	29.069	0	1	0	0.00899983	216.001	1.94397	0.522024	5.99974	3.13201	0	222	0.277777	0	0
-168.056	53.151		-76.584	-172.405	0	112.058	30.265	0	1	0	0.00858703	327	2.80796	0.269987	12.0004	3.23994	0	339.001	0.183486	0	0
-168.056	53.151		-78.13	0	-90	160.431	0	17	0	0	0.0075667	471.001	3.56393		0	0	51	471.001	0		10.828
-74.624	82.970		-79.509	-174.218	-90	123.566	39.702	20	1	0	0.00666635	364.501	2.4299	0.355524	11.9992	4.266	60	376.5	0.164608	0	15.9362
-171.027	19.235		-79.104	-176.496	0	135.781	32.728	0	1	0	0.00692989	399.999	2.77196	0.587921	6.00083	3.52802	0	406	0.15	0	0
0.000	0.000		-77.823	-174.075	0	129.582	35.523	0	1	0	0.00776834	379.999	2.95197	0.346884	11.0007	3.81599	0	391	0.157895	0	0
-70.684	154.179		-70.945	-172.117	0	160.811	65.62	0	1	0	0.0124344	455.998	5.67009	0.260004	26.9995	7.01999	0	482.998	0.131579	0	0
-169.380	56.976		-80.819	-171.87	0	50.142	10.607	0	1	0	0.00581847	148.499	0.864038	0.252003	4.50011	1.13404	0	152.999	0.404043	0	0
0.000	0.000		-79.426	-173.928	0	76.295	23.633	0	1	0	0.0067203	224.998	1.51206	0.338425	7.49956	2.53804	0	232.498	0.266669	0	0
-73.970	139.421		-82.694	-165.964	0	39.319	12.369	0	1	0	0.00461553	116.999	0.540015	0.144002	8.99962	1.29597	0	125.999	0.512823	0	0
-172.126	47.447		-70.756	-170.446	0	145.637	51.21	0	1	0	0.0125675	412.498	5.18408	0.213889	25.4991	5.45397	0	437.997	0.145455	0	0
0.000	0.000		-82.55	-172.235	0	65.553	11.102	0	1	0	0.00470753	194.999	0.917964	0.264005	4.49998	1.18802	0	199.499	0.307694	0	0
-83.868	60.848		-76.293	-173.66	0	42.202	18.111	0	1	0	0.0087805	123	1.08001	0.32401	5.9999	1.94403	0	129	0.487804	0	0
-170.218	14.714		-79.951	-165.964	0	80.231	24.739	0	1	0	0.00637951	237.001	1.51195	0.144002	18	2.59204	0	255	0.253164	0	0
0.000	0.000		-86.028	-172.875	0	72.173	16.125	0	1	0	0.00249968	215.999	0.53993	0.288	6.00017	1.72805	0	221.999	0.277779	0	0
-78.301	101.100		-79.695	-174.289	0	78.262	30.15	0	1	0	0.00654555	230.999	1.51201	0.359974	9.00075	3.24004	0	240	0.259742	0	0
-171.416	26.800		-72.392	-171.254	0	175.208	65.765	0	1	0	0.0114254	500.998	5.7241	0.234004	29.9996	7.02003	0	530.997	0.119761	0	0
0.000	0.000		-75.256	-173.29	0	98.234	34.234	0	1	0	0.00947397	284.998	2.70007	0.305992	12.0001	3.67195	0	296.998	0.210528	0	0
-73.828	52.060		-80.134	0	0	46.69	0	0	0	0	0.00626099	137.999	0.864008		0	0	0	137.999	0		0
-175.101	17.564		-76.759	-173.29	0	34.928	17.117	0	1	0	0.0084709	101.998	0.864018	0.305992	6.00006	1.83597	0	107.998	0.588245	0	0
0.000	0.000		-76.239	-171.327	0	201.792	59.682	0	1	0	0.00881646	588	5.18408	0.236005	26.9992	6.37195	0	614.999	0.102041	0	0
-73.502	149.661		-71.737	0	0	105.304	0	0	0	0	0.0118801	299.999	3.56401		0	0	0	299.999	0		0
0.000	0.000		-76.759	-170.538	0	34.928	12.166	0	1	0	0.0084709	101.998	0.864018	0.216007	6.00003	1.29605	0	107.998	0.588245	0	0
0.000	0.000		-72.759	-173.66	0	30.364	18.111	0	1	0	0.0111721	86.9989	0.97196	0.32401	5.9999	1.94403	0	92.9988	0.689664	0	0
-83.946	33.185		-80.426	0	0	84.172	0	0	0	0	0.00607214	248.999	1.51196		0	0	0	248.999	0		0
-171.870	3.536		-81.87	-171.87	0	49.497	14.142	0	1	1	0.00514279	146.999	0.755983	0.252003	5.99987	1.51199	0	152.998	0.408167	10.0002	0
0.000	0.000		-80.538	-170.44	0	12.166	6	0	1	1	0.00599979	36.0014	0.216001	0.213752	2.98945	0.639001	0	38.9909	1.6666	20.0706	0
-78.043	86.885		-83.83	-171.27	0	37.216	6	0	1	1	0.00389178	111.001	0.431993	0.23444	2.73201	0.640493	0	113.733	0.540534	21.9618	0
-173.367	21.645		-75.579	-172.569	0	144.554	46.39	0	1	0	0.00925729	419.998	3.88805	0.276015	17.9992	4.96804	0	437.997	0.142858	0	0
0.000	0.000		-75.426	0	0	51.662	0	0	0	0	0.00935985	149.999	1.40397		0	0	0	149.999	0		0
-79.234	72.272		-77.434	-167.471	0	165.464	46.098	0	1	0	0.00802452	484.501	3.88789	0.161997	30.0006	4.86003	0	514.502	0.123839	0	0
-176.987	19.026		-82.235	-173.991	0	22.204	9.552	0	1	0	0.00490898	66.0012	0.323999	0.342	2.99984	1.02595	0	69.001	0.909074	0	0
0.000	0.000		-82.476	-175.101	0	80.19	17.564	0	1	0	0.00475483	238.499	1.13402	0.420008	4.49987	1.88998	0	242.999	0.251574	0	0
-80.430	174.428		-72.615	-172.093	0	224.243	72.691	0	1	0	0.0112714	641.998	7.23619	0.259205	29.9993	7.77599	0	671.997	0.0934583	0	0
-169.461	43.738		-77.005	-171.254	0	26.683	13.153	0	1	0	0.00830794	77.9989	0.648011	0.234004	5.99991	1.40401	0	83.9988	0.769241	0	0
0.000	0.000		-81.573	-169.38	0	27.295	16.279	0	1	0	0.00533335	81.0009	0.432007	0.191993	9.00039	1.72802	0	90.0013	0.740732	0	0
-73.171	169.248		-74.427	8.653	0	126.649	46.53	0	1	0	0.0100331	365.999	3.6721	0.236558	-21.0013	-4.96804	0	344.998	0.163935	0	0
0.000	0.000		-80.44	-176.82	0	96.338	18.028	0	1	0	0.00606309	285	1.72798	0.647965	3.0002	1.94403	0	288	0.210526	0	0
0.000	0.000		-77.8	-175.426	0	75.71	25.08	0	1	0	0.00778347	222	1.72794	0.449992	6.00013	2.70001	0	228.001	0.27027	0	0
-74.650	105.773		-75.964	-175.601	0	41.231	26.077	0	1	0	0.00899983	120	1.07998	0.467968	6.00044	2.80802	0	126	0.5	0	0
-176.309	31.064		-78.232	-171.254	0	24.515	13.153	0	1	0	0.0074998	71.9992	0.53998	0.234004	5.99991	1.40401	0	77.9991	0.833343	0	0
0.000	0.000		-79.461	-168.223	0	43.738	10	0	1	0	0.00669755	129.001	0.863988	0.172668	6.12309	1.05727	0	135.124	0.465114	0	0
-78.210	163.959		-77.905	-168.69	0	128.86	40.792	0	1	0	0.00771444	377.999	2.91605	0.179999	24	4.31998	0	401.999	0.158731	0	0
-173.991	38.210		-73.523	0	0	74.041	0	0	1	0	0.010648	213.001	2.26803		0	0	0	213.001	0.281689		0
0.000	0.000		-78.826	-172.461	0	247.695	68.593	0	1	0	0.00711121	728.998	5.18407	0.272016	26.9984	7.34401	0	755.997	0.0823047	0	0
-75.192	89.989		-73.824	0	0	136.4	0	0	0	0	0.0104426	393	4.10395		0	0	0	393	0		0
-174.898	28.111		-77.259	-175.17	0	160.964	35.627	0	1	0	0.00814002	471.002	3.83397	0.426037	8.99934	3.83405	0	480.001	0.127388	0	0
0.000	0.000		-83.367	-176.424	0	21.645	8.016	0	1	0	0.00418635	64.5004	0.270021	0.576053	1.49993	0.864042	0	66.0003	0.930227	0	0
-79.563	19.320		-77.853	-171.87	0	114.054	28.284	0	1	0	0.00774862	334.501	2.59193	0.252003	11.9997	3.02397	0	346.501	0.179371	0	0
-169.216	10.689		-83.774	-174.806	0	55.326	11.045	0	1	0	0.00392738	164.999	0.648014	0.396032	2.99965	1.18796	0	167.999	0.363638	0	0
0.000	0.000		-75.964	-172.235	0	37.108	22.204	0	1	0	0.00899983	108	0.971985	0.264005	8.99997	2.37604	0	117	0.555554	0	0
-78.366	34.713		-79.415	-172.725	0	201.427	47.381	0	1	0	0.00672746	593.998	3.9961	0.282	17.9998	5.07595	0	611.998	0.10101	0	0
-172.569	11.597		-74.228	-173.928	0	136.125	47.265	0	1	0	0.010168	393	3.99601	0.338425	14.9988	5.07598	0	407.999	0.152672	0	0
0.000	0.000		-78.69	-175.365	0	56.089	18.561	0	1	0	0.00720004	164.999	1.188	0.444044	4.49962	1.99803	0	169.499	0.363638	0	0
-77.747	101.308		-77.619	-171.573	0	41.976	13.647	0	1	0	0.00790259	122.999	0.972015	0.242999	5.99987	1.45796	0	128.999	0.487807	0	0
-173.454	30.700		-82.794	-178.152	0	43.846	15.508	0	1	0	0.00455168	130.499	0.593991	1.11576	1.50031	1.67399	0	131.999	0.459773	0	0
0.000	0.000		-72.019	0	0	179.781	0	0	0	0	0.0116839	513.001	5.99386		0	0	0	513.001	0		0
-78.749	94.822		-76.64	-174.508	0	41.113	26.12	0	1	0	0.00854985	120.001	1.02599	0.374422	7.49958	2.80801	0	127.501	0.499995	0	0
-172.747	27.722		-74.055	-171.469	0	32.76	20.224	0	1	0	0.0102854	94.4988	0.971962	0.239993	9.00036	2.16003	0	103.499	0.634929	0	0
0.000	0.000		-75.05	-172.875	0	98.846	32.249	0	1	0	0.0096125	286.501	2.75399	0.288	12	3.456	0	298.501	0.209424	0	0
-72.387	33.049		-74.159	0	0	150.204	0	0	0	0	0.0102148	433.499	4.42811		0	0	0	433.499	0		0
-173.089	16.621		-72.73	0	0	326.731	0	0	0	0	0.0111921	936.002	10.4758		0	0	0	936.002	0		0
0.000	0.000		-75.482	-172.26	0	374.973	103.947	0	1	1	0.00932229	1089	10.152	0.264869	41.9981	11.124	0	1131	0.0550965	1.42864	0
-75.624	122.846		-78.959	-172.304	0	41.773	18.668	0	1	0	0.00702442	122.999	0.864001	0.266402	7.49989	1.99798	0	130.499	0.487807	0	0
-175.061	40.651		-78.176	-169.548	0	229.367	52.369	0	1	0	0.00753652	673.501	5.07586	0.195151	28.5011	5.56201	0	702.002	0.0890868	0	0
0.000	0.000		-76.43	-175.236	0	29.833	12.042	0	1	0	0.00868936	87.0005	0.75598	0.431967	3.00033	1.29604	0	90.0009	0.689651	0	0
-75.155	42.933		-74.846	-171.87	0	248.646	77.782	0	1	0	0.00974994	719.999	7.01996	0.252003	32.9997	8.31603	0	752.999	0.0833334	0	0
-174.472	15.572		-76.866	0	0	61.612	0	0	0	0	0.00839998	180.001	1.51201		0	0	0	180.001	0		0
-174.472	15.572		-78.69	-177.138	0	61.188	20.025	0	1	0	0.00720004	179.999	1.296	0.720101	2.99958	2.16	0	182.999	0.333335	0	0
-80.054	107.110		-75.651	-175.236	0	44.385	12.042	0	1	0	0.00920907	129.001	1.18798	0.431967	3.00033	1.29604	0	132.001	0.465112	0	0
-172.801	47.877		-75.426	-171.87	0	51.662	14.142	0	1	0	0.00935985	149.999	1.40397	0.252003	5.99987	1.51199	0	155.999	0.400002	0	0
0.000	0.000		-79.315	-173.991	0	53.935	19.105	0	1	0	0.0067925	159	1.08001	0.342	6	2.052	0	165	0.37736	0	0
-77.045	269.869		-73.926	0	0	122.801	0	0	0	0	0.0103732	354	3.67211		0	0	0	354	0		0
-171.870	60.104		-73.856	-172.875	0	39.56	24.187	0	1	0	0.0104208	114	1.18797	0.288	9.00006	2.59202	0	123	0.526316	0	0
0.000	0.000		-79.727	-169.695	0	162.607	44.721	0	1	0	0.00652478	480.001	3.1319	0.197997	24.0002	4.75196	0	504.001	0.125	0	0
-80.074	60.912		-75.426	-168.69	0	103.325	30.594	0	1	0	0.00935985	300.001	2.80797	0.179999	18	3.23999	0	318.001	0.199999	0	0
-172.648	15.628		-78.805	-173.928	0	195.724	47.265	0	1	0	0.00712492	575.999	4.10395	0.338425	14.9988	5.07598	0	590.998	0.104167	0	0
0.000	0.000		-69.489	0	0	148.408	0	0	0	0	0.0134677	416.999	5.61603		0	0	0	416.999	0		0
-65.933	138.544		-78.69	-175.914	0	101.98	28.071	0	1	0	0.00720004	299.999	2.16	0.503952	6.00049	3.02396	0	305.999	0.200001	0	0
0.000	0.000		-74.259	0	0	269.091	0	0	1	0	0.0101469	776.999	7.88416		0	0	0	776.999	0.0772202		0
0.000	0.000		-76.149	-174.352	0	150.373	45.722	0	1	0	0.00887642	438.001	3.88789	0.364016	13.4994	4.914	0	451.501	0.136986	0	0
-74.811	114.500		-84.188	-175.764	0	83.932	13.537	0	1	0	0.00366436	250.502	0.917929	0.486045	2.99972	1.458	0	253.501	0.239519	0	0
-172.171	40.376		-75.635	-177.879	0	42.323	13.509	0	1	0	0.00921978	122.999	1.13403	0.972043	1.4999	1.45797	0	124.499	0.487808	0	0
0.000	0.000		-74.792	-169.992	0	213.476	51.788	0	1	0	0.00978637	618	6.04798	0.203999	27	5.508	0	645	0.0970874	0	0
-75.411	75.432		-70.065	-171.656	0	102.651	37.901	0	1	0	0.0130567	289.5	3.77992	0.245451	16.5001	4.04998	0	306.001	0.207254	0	0
-172.235	22.204		-83.66	-173.991	0	22.638	9.552	0	1	0	0.00399987	67.4986	0.269986	0.342	2.99984	1.02595	0	70.4985	0.888907	0	0
0.000	0.000		-73.909	0	0	216.481	0	0	0	0	0.0103847	624	6.48007		0	0	0	624	0		0
-70.828	159.866		-76.527	-175.17	0	148.075	35.627	0	1	0	0.00862489	432	3.72595	0.426037	8.99934	3.83405	0	440.999	0.138889	0	0
-172.147	58.549		-76.159	-172.648	0	177.658	46.885	0	1	0	0.00886976	517.498	4.59009	0.279014	17.9989	5.02195	0	535.497	0.115942	0	0
0.000	0.000		-79.194	-175.914	0	189.357	42.107	0	1	0	0.00687127	557.998	3.83416	0.503952	9.00084	4.536	0	566.999	0.107527	0	0
-76.264	46.325		-75.665	-171.703	0	92.892	48.508	0	1	0	0.0091997	269.999	2.48392	0.246861	20.9998	5.18403	0	290.999	0.222223	0	0
-173.660	18.111		-77.76	-168.465	90	193.396	50.01	2	1	0	0.00780978	566.999	4.42814	0.176394	30.001	5.29199	6	597	0.10582	0	1.00502
0.000	0.000		-78.338	-173.29	0	286.923	85.586	0	1	0	0.00743034	843	6.26378	0.305992	30.0007	9.17997	0	873.001	0.0711744	0	0
-78.015	182.989		-79.366	-170.134	0	249.281	46.69	0	1	0	0.00675932	735	4.9681	0.206996	24.0002	4.96795	0	759	0.0816327	0	0
-172.405	45.398		-73.174	-169.011	-90	129.546	52.462	21	1	0	0.0108869	372	4.04991	0.185394	30.001	5.562	63	402.001	0.16129	0	15.6716
0.000	0.000		-82.2	-176.634	0	36.841	8.515	0	1	0	0.00493138	109.5	0.539989	0.612083	1.49985	0.918034	0	111	0.547943	0	0
-73.301	62.642		-71.966	-173.418	0	45.222	13.086	0	1	0	0.0117207	129.001	1.51199	0.311997	4.49995	1.40397	0	133.501	0.465112	0	0
0.000	0.000		-84.472	-165.256	0	62.29	9.823	0	1	0	0.00348416	186.001	0.648057	0.136796	7.49988	1.02595	0	193.501	0.322579	0	0
0.000	0.000		-75.579	-170.698	0	162.624	58.773	0	1	0	0.00925729	472.5	4.37407	0.219791	28.4999	6.26402	0	501	0.126984	0	0
-74.401	204.534		-74.476	-171.87	0	18.682	7.071	0	1	0	0.00999991	54.0014	0.540009	0.252003	2.99993	0.755993	0	57.0013	1.11108	0	0
-168.887	57.070		-78.465	-173.418	0	100.02	26.173	0	1	0	0.00734718	294	2.16007	0.311997	9.00025	2.80805	0	303	0.204082	0	0
0.000	0.000		-83.089	-173.991	0	33.242	9.552	0	1	0	0.00436349	99.0014	0.431992	0.342	2.99984	1.02595	0	102.001	0.606052	0	0
-77.661	98.270		-76.866	-172.648	0	30.806	31.257	0	1	0	0.00839998	90.0005	0.756003	0.279014	11.9994	3.348	0	102	0.666663	0	0
-172.093	36.346		-72.824	-172.278	0	172.702	59.54	0	1	0	0.0111273	495	5.50803	0.265494	24.0006	6.37201	0	519	0.121212	0	0
0.000	0.000		-78.179	-172.569	0	87.864	23.195	0	1	0	0.00753456	258.002	1.94393	0.276015	8.99958	2.48402	0	267.001	0.232556	0	0
-73.773	139.560		-75.964	0	0	49.477	0	0	0	0	0.00899983	143.999	1.29597		0	0	0	143.999	0		0
-172.875	48.374		-75.564	-172.405	0	208.586	68.097	0	1	0	0.00926733	606.001	5.61602	0.269987	27.0011	7.28996	0	633.002	0.0990098	0	0
0.000	0.000		-78.996	-173.66	0	18.337	9.055	0	1	0	0.00700029	53.9996	0.378013	0.32401	2.99978	0.971959	0	56.9993	1.11112	0	0
-77.196	90.244		-78.904	-174.174	0	210.434	49.254	0	1	0	0.0070603	619.501	4.37387	0.352821	14.999	5.29196	0	634.499	0.0968522	0	0
-171.573	27.295		-76.522	-173.66	0	62.213	18.111	0	1	0	0.00862821	181.499	1.56601	0.32401	5.9999	1.94403	0	187.499	0.330581	0	0
0.000	0.000		-75.619	-162.474	0	20.131	9.962	0	1	0	0.0092305	58.5006	0.53999	0.113997	8.99983	1.02595	0	67.5004	1.02563	0	0
-74.311	214.491		-79.634	-170.538	0	41.68	12.166	0	1	0	0.00658515	122.999	0.809969	0.216007	6.00003	1.29605	0	128.999	0.487808	0	0
-167.330	66.110		-84.611	-174.56	0	26.618	10.548	0	1	0	0.00339603	79.501	0.269988	0.378023	2.99996	1.13405	0	82.501	0.754707	0	0
0.000	0.000		-75.809	0	0	134.608	0	0	0	0	0.00910337	391.501	3.56398		0	0	0	391.501	0		0
-78.690	30.594		-78.69	-176.228	0	387.525	91.198	0	1	1	0.00720004	1140	8.20804	0.546041	17.9987	9.82805	0	1158	0.0526317	3.33357	0
-171.254	13.153		-77.293	-173.884	0	104.561	28.16	0	1	0	0.00811756	306	2.48398	0.335972	9.00065	3.02397	0	315.001	0.196078	0	0
0.000	0.000		-76.734	-173.29	0	126.372	34.234	0	1	0	0.00848748	368.999	3.13188	0.305992	12.0001	3.67195	0	380.999	0.162602	0	0
-74.982	127.350		-78.69	-172.875	0	50.99	16.125	0	1	0	0.00720004	149.999	1.08	0.288	6.00017	1.72805	0	156	0.400002	0	0
-170.538	36.497		-76.759	-175.426	0	69.857	25.08	0	1	0	0.0084709	204	1.72806	0.449992	6.00013	2.70001	0	210	0.294118	0	0
0.000	0.000		-82.405	-173.66	0	15.133	9.055	0	1	0	0.00480022	45.0007	0.216014	0.32401	2.99978	0.971959	0	48.0005	1.33331	0	0
-73.706	135.440		-76.562	-174.806	0	116.181	33.136	0	1	1	0.00860164	339.001	2.91596	0.396032	8.99924	3.56399	0	348	0.176991	6.66723	0
-167.905	42.953		-74.055	-169.287	0	145.602	37.656	0	1	0	0.0102854	420	4.31989	0.190288	20.9996	3.99597	0	441	0.142857	0	0
0.000	0.000		-70.346	-174.806	0	29.732	22.091	0	1	0	0.0128573	83.9995	1.08	0.396032	5.99958	2.37603	0	89.9991	0.71429	0	0
-71.697	136.927		-73.202	-172.875	0	110.725	48.374	0	1	0	0.0108677	318.001	3.45593	0.288	18.0001	5.18405	0	336.001	0.188679	0	0
-171.870	49.497		-79.824	-172.405	0	39.623	15.133	0	1	0	0.00646185	116.999	0.756032	0.269987	6.00038	1.62003	0	123	0.512824	0	0
0.000	0.000		-82.786	-174.806	0	79.63	22.091	0	1	0	0.00455679	236.999	1.07996	0.396032	5.99958	2.37603	0	242.999	0.253166	0	0
-75.466	27.893		-85.333	-173.66	0	49.163	18.111	0	1	0	0.00293886	147	0.432013	0.32401	5.9999	1.94403	0	153	0.408163	0	0
-176.186	15.033		-82.648	-168.69	0	93.771	15.297	0	1	0	0.00464491	279	1.29593	0.179999	9.00002	1.61999	0	288	0.215054	0	0
0.000	0.000		-71.742	0	0	204.284	0	0	0	0	0.0118766	581.998	6.91216		0	0	0	581.998	0		0
-80.754	43.566		-77.234	-173.774	0	131.244	55.326	0	1	0	0.00815653	383.999	3.1321	0.329991	18.0004	5.93997	0	402	0.15625	0	0
-172.405	15.133		-77.385	-171.327	0	215.195	59.682	0	1	0	0.00805684	630	5.07582	0.236005	26.9992	6.37195	0	657	0.095238	0	0
0.000	0.000		-77.873	-172.694	0	123.762	39.319	0	1	0	0.00773547	363.001	2.80798	0.28079	15.0004	4.21198	0	378.001	0.165289	0	0
-76.608	302.218		-77.142	-174.401	-90	188.733	51.245	1	1	0	0.00821732	552.001	4.53598	0.367222	14.9992	5.50806	3	567.001	0.108695	0	0.5291
-173.729	91.548		-78.896	-170.049	0	218.083	57.871	0	1	0	0.00706552	642.001	4.53608	0.205192	30.0013	6.15604	0	672.002	0.0934578	0	0
-173.729	91.548		-73.61	0	0	141.76	0	0	0	0	0.0105885	407.998	4.32011		0	0	0	407.998	0		0
-79.563	38.639		-73.113	-170.91	0	58.523	25.318	0	1	0	0.0109287	167.998	1.83601	0.225007	11.9996	2.7	0	179.998	0.357146	0	0
-171.469	20.224		-77.749	-172.405	0	179.078	45.398	0	1	0	0.00781702	525	4.10394	0.269987	18.0007	4.85997	0	543.001	0.114286	0	0
0.000	0.000		-75.51	-170.789	0	91.924	37.483	0	1	0	0.00930352	267	2.48404	0.222	17.9998	3.99597	0	285	0.224719	0	0
-73.465	267.043		-77.963	-171.027	0	69.529	19.235	0	1	0	0.00767633	204.001	1.56598	0.22799	9.00019	2.05196	0	213.001	0.294116	0	0
-166.799	83.199		-81.469	-169.38	0	30.336	8.139	0	1	0	0.00540015	90.0011	0.486019	0.191993	4.49992	0.863955	0	94.501	0.666659	0	0
0.000	0.000		-73.692	-175.486	0	119.3	38.118	0	1	0	0.0105326	343.5	3.61795	0.455998	8.99997	4.10397	0	352.5	0.174672	0	0
-75.256	58.941		-78.625	0	0	86.193	0	0	0	0	0.00724252	253.5	1.83598		0	0	0	253.5	0		0
0.000	0.000		-78.774	-171.573	0	267.11	54.589	0	1	0	0.00714516	785.998	5.61609	0.242999	23.9999	5.83196	0	809.998	0.0763361	0	0
0.000	0.000		-78.826	-164.932	0	82.565	26.926	0	1	0	0.00711121	242.999	1.72802	0.133719	20.9995	2.80802	0	263.999	0.246914	0	0
-78.111	38.833		-75.336	-169.611	0	221.206	61	0	1	0	0.00942024	642.002	6.04782	0.196361	33.0004	6.48	0	675.002	0.0934577	0	0
-174.806	11.045		-77.164	-171.027	0	81.025	38.471	0	1	0	0.00820278	237.001	1.94407	0.22799	18.0009	4.10402	0	255.001	0.253164	0	0
0.000	0.000		-79.695	-168.408	0	11.18	79.624	0	1	0	0.00654555	32.999	0.215997	0.175503	47.9992	8.42399	0	80.9982	1.81824	0	0
-75.895	201.062		-80.838	-169.84	0	62.801	8	0	1	0	0.00580622	185.999	1.07995	0.200884	4.23354	0.850452	0	190.233	0.322582	0	0
-171.870	56.569		-77.161	-167.471	0	220.513	64.537	0	1	0	0.00820476	644.999	5.29207	0.161997	42.0008	6.80401	0	687	0.0930233	0	0
0.000	0.000		-79.33	-170.538	0	70.214	18.248	0	1	0	0.00678274	207	1.40403	0.216007	8.99955	1.94397	0	216	0.289855	0	0
-73.009	37.643		-80.134	-169.695	0	116.726	22.361	0	1	0	0.00626099	344.999	2.16004	0.197997	12.0003	2.37603	0	357	0.173913	0	0
-168.690	15.297		-76.931	-172.278	0	172.467	59.54	0	1	0	0.00835692	504	4.21189	0.265494	24.0006	6.37201	0	528	0.119048	0	0
0.000	0.000		-77.266	-171.158	0	181.463	45.541	0	1	0	0.00813539	530.999	4.31989	0.231423	21.0003	4.85998	0	552	0.112995	0	0
-75.712	303.900		-71.565	-171.87	0	56.921	21.213	0	1	0	0.012	162	1.94401	0.252003	8.9998	2.26798	0	171	0.37037	0	0
0.000	0.000		-76.675	-169.261	0	195.256	59.034	0	1	0	0.00852662	569.998	4.86016	0.189816	33.0004	6.26401	0	602.999	0.105263	0	0
0.000	0.000		-73.479	-176.009	0	123.081	43.105	0	1	0	0.010678	353.999	3.78002	0.515988	9.0003	4.64405	0	362.999	0.169492	0	0
-74.667	64.288		-79.03	0	0	231.225	0	0	0	0	0.00697812	680.999	4.7521		0	0	0	680.999	0		0
-176.309	31.064		-79.54	-176.055	0	66.098	29.069	0	1	0	0.00664621	194.999	1.296	0.522024	5.99974	3.13201	0	200.998	0.307694	0	0
0.000	0.000		-74.219	-172.875	0	47.802	32.249	0	1	0	0.0101741	138.001	1.40403	0.288	12	3.456	0	150.001	0.43478	0	0
-78.729	286.526		-77.082	-175.101	0	111.83	35.128	0	1	0	0.008257	326.999	2.70003	0.420008	8.99974	3.77996	0	335.999	0.183487	0	0
-172.569	69.584		-73.887	-174.56	0	46.84	21.095	0	1	0	0.0103997	135	1.40396	0.378023	5.99963	2.268	0	140.999	0.444445	0	0
-90.000	15.000		-75.141	0	0	50.695	0	0	0	0	0.00955127	146.999	1.40403		0	0	0	146.999	0		0
-77.905	14.318		-74.932	-175.914	0	26.926	28.071	0	1	0	0.00969197	78.0007	0.755981	0.503952	6.00049	3.02396	0	84.0012	0.769224	0	0
-172.875	16.125		-79.695	-175.601	0	33.541	26.077	0	1	0	0.00654555	98.9999	0.648009	0.467968	6.00044	2.80802	0	105	0.606061	0	0
0.000	0.000		-76.255	-171.529	0	143.098	47.518	0	1	0	0.00880581	417	3.67203	0.241718	20.9995	5.07596	0	438	0.143885	0	0
-74.249	202.608		-86.055	-169.695	0	29.069	11.18	0	1	0	0.00248264	87.0004	0.215991	0.197997	5.99991	1.18796	0	93.0003	0.689652	0	0
-170.538	66.910		-74.055	-169.38	0	109.202	32.558	0	1	0	0.0102854	315.002	3.23993	0.191993	18.0008	3.45603	0	333.002	0.190475	0	0
0.000	0.000		-77.661	-171.254	-90	98.27	39.459	36.878	1	0	0.00787493	288	2.26798	0.234004	17.9997	4.21202	110.634	306	0.208333	0	36.1549
-71.061	107.838		-69.775	-178.025	0	80.994	29.017	0	1	0	0.0132632	228	3.02403	1.04396	3.00008	3.13197	0	231	0.263158	0	0
-172.569	46.390		-69.146	-165.256	0	44.944	19.647	0	1	0	0.0137139	125.999	1.72795	0.136796	15.0005	2.05201	0	141	0.476193	0	0
0.000	0.000		-83.136	-174.289	0	108.78	40.2	0	1	0	0.00433353	324.001	1.40407	0.359974	12.001	4.32005	0	336.002	0.185185	0	0
-72.163	212.200		-76.044	-166.827	0	174.141	48.27	0	1	0	0.00894644	507.002	4.53587	0.153813	33.001	5.07598	0	540.003	0.118343	0	0
0.000	0.000		-72.309	-171.347	0	121.758	46.53	0	1	0	0.0114828	348	3.99603	0.236558	21.0013	4.96804	0	369.001	0.172414	0	0
0.000	0.000		-72.446	-168.959	0	102.786	41.773	0	1	0	0.0113881	293.999	3.34808	0.184499	24	4.42798	0	317.999	0.204083	0	0
-75.964	74.216		-77.407	0	0	96.317	0	0	0	0	0.00804233	282	2.26794		0	0	0	282	0		0
-176.055	29.069		-78.69	-173.29	0	25.495	17.117	0	1	0	0.00720004	74.9997	0.540001	0.305992	6.00006	1.83597	0	80.9998	0.800003	0	0
0.000	0.000		-68.199	-162.35	0	43.081	23.087	0	1	0	0.0143997	119.999	1.72796	0.113144	21	2.37602	0	141	0.500002	0	0
-76.584	112.058		-70.677	-173.517	0	81.597	44.283	0	1	0	0.0126232	231.001	2.91599	0.316803	14.9998	4.75198	0	246.001	0.259739	0	0
-172.405	30.265		-74.703	0	0	121.297	0	0	0	0	0.00984645	350.999	3.4561		0	0	0	350.999	0		0
0.000	0.000		-73.358	-174.644	0	192.044	64.281	0	1	0	0.0107608	551.999	5.93996	0.383987	18.0007	6.91204	0	570	0.108696	0	0
-78.130	160.431		-72.42	-168.818	0	211.896	87.664	0	1	0	0.011406	605.999	6.91205	0.182113	51.001	9.28798	0	657	0.0990101	0	0
0.000	0.000		-73.025	-172.504	0	99.328	38.328	0	1	0	0.0109891	285.002	3.13192	0.273594	15.0005	4.10405	0	300.002	0.210525	0	0
-90.000	17.000		-69.274	-169.695	0	39.56	22.361	0	1	0	0.0136219	110.999	1.51203	0.197997	12.0003	2.37603	0	123	0.540543	0	0
-79.509	123.566		-76.608	-172.875	0	43.174	16.125	0	1	0	0.00857109	126	1.07996	0.288	6.00017	1.72805	0	132	0.47619	0	0
-174.218	39.702		-74.827	-174.401	0	122.262	51.245	0	1	0	0.00976276	354	3.45602	0.367222	14.9992	5.50806	0	368.999	0.169492	0	0
-175.121	41.149		-72.387	-171.87	0	66.098	28.284	0	1	0	0.0114289	188.998	2.16004	0.252003	11.9997	3.02397	0	200.998	0.317463	0	0
-79.104	135.781		-76.629	-167.276	0	125.399	31.78	0	1	0	0.00855715	365.999	3.13191	0.159433	20.9991	3.34795	0	386.999	0.163935	0	0
-176.496	32.728		-74.358	-167.905	0	25.962	14.318	0	1	0	0.0100798	75.0015	0.756003	0.167996	9.00029	1.51202	0	84.0018	0.799984	0	0
0.000	0.000		-72.35	-175.236	0	23.087	12.042	0	1	0	0.0114544	66.0006	0.756002	0.431967	3.00033	1.29604	0	69.001	0.909082	0	0
-77.823	129.582		-80.218	0	0	88.284	0	0	0	0	0.00620663	261.001	1.61994		0	0	0	261.001	0		0
-174.075	35.523		-70.787	-174.958	0	69.893	34.132	0	1	0	0.0125457	198	2.48405	0.408036	8.99917	3.67199	0	206.999	0.30303	0	0
0.000	0.000		-75.651	-171.87	0	44.385	14.142	0	1	0	0.00920907	129.001	1.18798	0.252003	5.99987	1.51199	0	135.001	0.465112	0	0
-70.945	160.811		-77.905	-176.82	0	28.636	18.028	0	1	0	0.00771444	84.001	0.648021	0.647965	3.0002	1.94403	0	87.0012	0.714277	0	0
-172.117	65.620		-72.423	0	0	168.885	0	0	0	0	0.011404	483	5.50812		0	0	0	483	0		0
0.000	0.000		-76.171	-169.875	0	66.94	28.443	0	1	0	0.00886176	194.999	1.72804	0.201593	15.0005	3.024	0	209.999	0.307694	0	0
-80.819	50.142		-73.382	-170.647	0	269.245	86.145	0	1	0	0.0107444	773.998	8.31613	0.218571	42	9.17998	0	815.998	0.0775196	0	0
-171.870	10.607		-81.048	-174.644	0	147.801	32.14	0	1	0	0.00567092	438.002	2.48388	0.383987	9.0002	3.45596	0	447.002	0.136986	0	0
0.000	0.000		-80.362	-171.027	0	53.759	19.235	0	1	0	0.0061135	159.001	0.972051	0.22799	9.00019	2.05196	0	168.001	0.377357	0	0
-79.426	76.295		-72.255	-164.055	0	26.249	14.56	0	1	0	0.0115202	75.0004	0.864022	0.126003	11.9995	1.51198	0	86.9999	0.799996	0	0
-173.928	23.633		-75.466	-174.144	0	111.571	39.205	0	1	0	0.00933302	324.002	3.02392	0.351	12.0001	4.21204	0	336.002	0.185184	0	0
0.000	0.000		-72.474	-170.538	0	19.925	12.166	0	1	0	0.0113687	57.0003	0.64802	0.216007	6.00003	1.29605	0	63.0003	1.05263	0	0
-82.694	39.319		-80.623	-172.147	0	110.476	29.275	0	1	0	0.00594491	326.999	1.94398	0.26101	11.9997	3.13205	0	338.999	0.183487	0	0
-165.964	12.369		-77.159	-176.82	0	139.488	36.056	0	1	0	0.00820609	407.998	3.34807	0.647965	6.0004	3.88805	0	413.999	0.147059	0	0
0.000	0.000		-80.676	-172.875	0	135.794	40.311	0	1	0	0.00591071	402	2.3761	0.288	14.9999	4.31997	0	417	0.149254	0	0
-70.756	145.637		-76.961	-169.992	0	97.514	34.525	0	1	0	0.00833706	284.999	2.37606	0.203999	17.9999	3.67196	0	302.999	0.210527	0	0
-170.446	51.210		-75.005	-175.236	0	57.974	24.083	0	1	0	0.00964279	168	1.61999	0.431967	6.0004	2.59198	0	174	0.357144	0	0
0.000	0.000		-73.374	-171.573	0	150.283	54.589	1	1	0	0.0107498	432	4.64394	0.242999	23.9999	5.83196	0	456	0.138889	0	0
-82.550	65.553		-79.114	-170.538	0	79.429	24.331	0	1	0	0.00692338	233.999	1.62007	0.216007	11.9996	2.592	0	245.999	0.256411	0	0
-172.235	11.102		-77.506	-169.992	0	360.538	86.313	0	1	0	0.00797704	1056	8.42377	0.203999	44.9999	9.17996	0	1101	0.0568182	0	0
0.000	0.000		-71.222	-174.289	0	105.622	40.2	1	1	0	0.01224	300	3.67199	0.359974	12.001	4.32005	0	312.001	0.2	0	0
-76.293	42.202		-81.591	-175.236	0	116.25	36.125	0	1	0	0.00532179	345.001	1.83602	0.431967	9.00073	3.88802	0	354.001	0.173913	0	0
-173.660	18.111		-72.719	-174.806	0	94.255	33.136	0	1	0	0.0111996	270.001	3.02392	0.396032	8.99924	3.56399	0	279	0.222222	0	0
0.000	0.000		-72.613	-175.156	0	207.48	59.211	0	1	0	0.0112727	594	6.69601	0.4248	14.9999	6.37195	0	608.999	0.10101	0	0
-79.951	80.231		-72.897	-173.29	0	54.406	34.234	0	1	0	0.0110771	156	1.72803	0.305992	12.0001	3.67195	0	168	0.384615	0	0
-165.964	24.739		-63.435	-168.69	0	11.18	10.198	0	1	0	0.0179999	29.9991	0.539983	0.179999	6.00001	1.08	0	35.9991	2.00006	0	0
0.000	0.000		-78.499	-172.349	0	235.733	67.602	0	1	0	0.00732493	692.999	5.07618	0.267987	27.0013	7.23602	0	720.001	0.0865802	0	0
-86.028	72.173		-75.362	-168.887	0	138.495	57.07	0	1	0	0.00940279	401.999	3.77992	0.183273	32.9998	6.04799	0	434.999	0.149254	0	0
-172.875	16.125		-73.35	0	0	223.365	0	0	0	0	0.0107663	642	6.91195		0	0	0	642	0		0
0.000	0.000		-79.16	-174.56	0	382.832	84.38	0	1	0	0.00689341	1128	7.77579	0.378023	23.9985	9.072	0	1152	0.0531914	0	0
-79.695	78.262		-75.885	-168.366	0	176.324	69.426	1	1	1	0.00905259	513.001	4.64399	0.174851	42.0012	7.34397	0	555.003	0.116959	1.42853	0
-174.289	30.150		-76.608	0	0	86.348	0	0	0	0	0.00857109	252	2.15992		0	0	0	252	0		0
0.000	0.000		-83.66	-177.274	0	45.277	21.024	0	1	0	0.00399987	135	0.539985	0.756086	2.99969	2.26802	0	138	0.444444	0	0
-72.392	175.208		-78.832	-172.117	0	237.497	65.62	0	1	0	0.00710729	698.999	4.96799	0.260004	26.9995	7.01999	0	725.998	0.085837	0	0
-171.254	65.765		-76.201	-170.134	0	58.694	23.345	0	1	0	0.00884177	171	1.51194	0.206996	12.0001	2.48397	0	183	0.350877	0	0
0.000	0.000		-78.69	-173.29	0	30.594	17.117	0	1	0	0.00720004	89.9996	0.648001	0.305992	6.00006	1.83597	0	95.9997	0.666669	0	0
-75.256	98.234		-76.373	-160.017	0	33.956	11.705	0	1	0	0.00872727	99.0004	0.864004	0.0990005	12.0002	1.18803	0	111.001	0.606058	0	0
-173.290	34.234		-74.609	0	0	184.621	0	0	0	0	0.00990996	534	5.29192		0	0	0	534	0		0
0.000	0.000
-80.134	46.690
0.000	0.000
0.000	0.000
-76.759	34.928
-173.290	17.117
0.000	0.000
-76.239	201.792
-171.327	59.682
0.000	0.000
-71.737	105.304
0.000	0.000
0.000	0.000
-76.759	34.928
-170.538	12.166
0.000	0.000
-72.759	30.364
-173.660	18.111
0.000	0.000
-80.426	84.172
0.000	0.000
0.000	0.000
-81.870	49.497
-171.870	14.142
0.000	0.000
-80.538	12.166
180.000	6.000
0.000	0.000
-83.830	37.216
180.000	6.000
0.000	0.000
-75.579	144.554
-172.569	46.390
0.000	0.000
-75.426	51.662
0.000	0.000
0.000	0.000
-77.434	165.464
-167.471	46.098
0.000	0.000
-82.235	22.204
-173.991	9.552
0.000	0.000
-82.476	80.190
-175.101	17.564
0.000	0.000
-72.615	224.243
-172.093	72.691
0.000	0.000
-77.005	26.683
-171.254	13.153
0.000	0.000
-81.573	27.295
-169.380	16.279
0.000	0.000
-74.427	126.649
8.653	46.530
0.000	0.000
-80.440	96.338
-176.820	18.028
0.000	0.000
-77.800	75.710
-175.426	25.080
0.000	0.000
-75.964	41.231
-175.601	26.077
0.000	0.000
-78.232	24.515
-171.254	13.153
0.000	0.000
-79.461	43.738
180.000	10.000
0.000	0.000
-77.905	128.860
-168.690	40.792
0.000	0.000
-73.523	74.041
0.000	0.000
0.000	0.000
-78.826	247.695
-172.461	68.593
0.000	0.000
-73.824	136.400
0.000	0.000
0.000	0.000
-77.259	160.964
-175.170	35.627
0.000	0.000
-83.367	21.645
-176.424	8.016
0.000	0.000
-77.853	114.054
-171.870	28.284
0.000	0.000
-83.774	55.326
-174.806	11.045
0.000	0.000
-75.964	37.108
-172.235	22.204
0.000	0.000
-79.415	201.427
-172.725	47.381
0.000	0.000
-74.228	136.125
-173.928	47.265
0.000	0.000
-78.690	56.089
-175.365	18.561
0.000	0.000
-77.619	41.976
-171.573	13.647
0.000	0.000
-82.794	43.846
-178.152	15.508
0.000	0.000
-72.019	179.781
0.000	0.000
0.000	0.000
-76.640	41.113
-174.508	26.120
0.000	0.000
-74.055	32.760
-171.469	20.224
0.000	0.000
-75.050	98.846
-172.875	32.249
0.000	0.000
-74.159	150.204
0.000	0.000
0.000	0.000
-72.730	326.731
0.000	0.000
0.000	0.000
-75.482	374.973
-172.260	103.947
0.000	0.000
-78.959	41.773
-172.304	18.668
0.000	0.000
-78.176	229.367
-169.548	52.369
0.000	0.000
-76.430	29.833
-175.236	12.042
0.000	0.000
-74.846	248.646
-171.870	77.782
0.000	0.000
-76.866	61.612
0.000	0.000
0.000	0.000
-78.690	61.188
-177.138	20.025
0.000	0.000
-75.651	44.385
-175.236	12.042
0.000	0.000
-75.426	51.662
-171.870	14.142
0.000	0.000
-79.315	53.935
-173.991	19.105
0.000	0.000
-73.926	122.801
0.000	0.000
0.000	0.000
-73.856	39.560
-172.875	24.187
0.000	0.000
-79.727	162.607
-169.695	44.721
0.000	0.000
-75.426	103.325
-168.690	30.594
0.000	0.000
-78.805	195.724
-173.928	47.265
0.000	0.000
-69.489	148.408
0.000	0.000
0.000	0.000
-78.690	101.980
-175.914	28.071
0.000	0.000
-74.259	269.091
0.000	0.000
0.000	0.000
-76.149	150.373
-174.352	45.722
0.000	0.000
-84.188	83.932
-175.764	13.537
0.000	0.000
-75.635	42.323
-177.879	13.509
0.000	0.000
-74.792	213.476
-169.992	51.788
0.000	0.000
-70.065	102.651
-171.656	37.901
0.000	0.000
-83.660	22.638
-173.991	9.552
0.000	0.000
-73.909	216.481
0.000	0.000
0.000	0.000
-76.527	148.075
-175.170	35.627
0.000	0.000
-76.159	177.658
-172.648	46.885
0.000	0.000
-79.194	189.357
-175.914	42.107
0.000	0.000
-75.665	92.892
-171.703	48.508
0.000	0.000
-77.760	193.396
-168.465	50.010
-26.565	2.236
-78.338	286.923
-173.290	85.586
0.000	0.000
-79.366	249.281
-170.134	46.690
0.000	0.000
-73.174	129.546
-169.011	52.462
-90.000	21.500
-82.200	36.841
-176.634	8.515
0.000	0.000
-71.966	45.222
-173.418	13.086
0.000	0.000
-84.472	62.290
-165.256	9.823
0.000	0.000
-75.579	162.624
-170.698	58.773
0.000	0.000
-74.476	18.682
-171.870	7.071
0.000	0.000
-78.465	100.020
-173.418	26.173
0.000	0.000
-83.089	33.242
-173.991	9.552
0.000	0.000
-76.866	30.806
-172.648	31.257
0.000	0.000
-72.824	172.702
-172.278	59.540
0.000	0.000
-78.179	87.864
-172.569	23.195
0.000	0.000
-75.964	49.477
0.000	0.000
0.000	0.000
-75.564	208.586
-172.405	68.097
0.000	0.000
-78.996	18.337
-173.660	9.055
0.000	0.000
-78.904	210.434
-174.174	49.254
0.000	0.000
-76.522	62.213
-173.660	18.111
0.000	0.000
-75.619	20.131
-162.474	9.962
0.000	0.000
-79.634	41.680
-170.538	12.166
0.000	0.000
-84.611	26.618
-174.560	10.548
0.000	0.000
-75.809	134.608
0.000	0.000
0.000	0.000
-78.690	387.525
-176.228	91.198
0.000	0.000
-77.293	104.561
-173.884	28.160
0.000	0.000
-76.734	126.372
-173.290	34.234
0.000	0.000
-78.690	50.990
-172.875	16.125
0.000	0.000
-76.759	69.857
-175.426	25.080
0.000	0.000
-82.405	15.133
-173.660	9.055
0.000	0.000
-76.562	116.181
-174.806	33.136
0.000	0.000
-74.055	145.602
-169.287	37.656
0.000	0.000
-70.346	29.732
-174.806	22.091
0.000	0.000
-73.202	110.725
-172.875	48.374
0.000	0.000
-79.824	39.623
-172.405	15.133
0.000	0.000
-82.786	79.630
-174.806	22.091
0.000	0.000
-85.333	49.163
-173.660	18.111
0.000	0.000
-82.648	93.771
-168.690	15.297
0.000	0.000
-71.742	204.284
0.000	0.000
0.000	0.000
-77.234	131.244
-173.774	55.326
0.000	0.000
-77.385	215.195
-171.327	59.682
0.000	0.000
-77.873	123.762
-172.694	39.319
0.000	0.000
-77.142	188.733
-174.401	51.245
180.000	1.000
-78.896	218.083
-170.049	57.871
0.000	0.000
-73.610	141.760
0.000	0.000
0.000	0.000
-73.113	58.523
-170.910	25.318
0.000	0.000
-77.749	179.078
-172.405	45.398
0.000	0.000
-75.510	91.924
-170.789	37.483
0.000	0.000
-77.963	69.529
-171.027	19.235
0.000	0.000
-81.469	30.336
-169.380	8.139
0.000	0.000
-73.692	119.300
-175.486	38.118
0.000	0.000
-78.625	86.193
0.000	0.000
0.000	0.000
-78.774	267.110
-171.573	54.589
0.000	0.000
-78.826	82.565
-164.932	26.926
0.000	0.000
-75.336	221.206
-169.611	61.000
0.000	0.000
-77.164	81.025
-171.027	38.471
0.000	0.000
-79.695	11.180
-168.408	79.624
0.000	0.000
-80.838	62.801
180.000	8.000
0.000	0.000
-77.161	220.513
-167.471	64.537
0.000	0.000
-79.330	70.214
-170.538	18.248
0.000	0.000
-80.134	116.726
-169.695	22.361
0.000	0.000
-76.931	172.467
-172.278	59.540
0.000	0.000
-77.266	181.463
-171.158	45.541
0.000	0.000
-71.565	56.921
-171.870	21.213
0.000	0.000
-76.675	195.256
-169.261	59.034
0.000	0.000
-73.479	123.081
-176.009	43.105
0.000	0.000
-79.030	231.225
0.000	0.000
0.000	0.000
-79.540	66.098
-176.055	29.069
0.000	0.000
-74.219	47.802
-172.875	32.249
0.000	0.000
-77.082	111.830
-175.101	35.128
0.000	0.000
-73.887	46.840
-174.560	21.095
0.000	0.000
-75.141	50.695
0.000	0.000
0.000	0.000
-74.932	26.926
-175.914	28.071
0.000	0.000
-79.695	33.541
-175.601	26.077
0.000	0.000
-76.255	143.098
-171.529	47.518
0.000	0.000
-86.055	29.069
-169.695	11.180
0.000	0.000
-74.055	109.202
-169.380	32.558
0.000	0.000
-77.661	98.270
-171.254	39.459
-167.471	36.878
-69.775	80.994
-178.025	29.017
0.000	0.000
-69.146	44.944
-165.256	19.647
0.000	0.000
-83.136	108.780
-174.289	40.200
0.000	0.000
-76.044	174.141
-166.827	48.270
0.000	0.000
-72.309	121.758
-171.347	46.530
0.000	0.000
-72.446	102.786
-168.959	41.773
0.000	0.000
-77.407	96.317
0.000	0.000
0.000	0.000
-78.690	25.495
-173.290	17.117
0.000	0.000
-68.199	43.081
-162.350	23.087
0.000	0.000
-70.677	81.597
-173.517	44.283
0.000	0.000
-74.703	121.297
0.000	0.000
0.000	0.000
-73.358	192.044
-174.644	64.281
0.000	0.000
-72.420	211.896
-168.818	87.664
0.000	0.000
-73.025	99.328
-172.504	38.328
0.000	0.000
-69.274	39.560
-169.695	22.361
0.000	0.000
-76.608	43.174
-172.875	16.125
0.000	0.000
-74.827	122.262
-174.401	51.245
0.000	0.000
-72.387	66.098
-171.870	28.284
0.000	0.000
-76.629	125.399
-167.276	31.780
0.000	0.000
-74.358	25.962
-167.905	14.318
0.000	0.000
-72.350	23.087
-175.236	12.042
0.000	0.000
-80.218	88.284
0.000	0.000
0.000	0.000
-70.787	69.893
-174.958	34.132
0.000	0.000
-75.651	44.385
-171.870	14.142
0.000	0.000
-77.905	28.636
-176.820	18.028
0.000	0.000
-72.423	168.885
0.000	0.000
0.000	0.000
-76.171	66.940
-169.875	28.443
0.000	0.000
-73.382	269.245
-170.647	86.145
0.000	0.000
-81.048	147.801
-174.644	32.140
0.000	0.000
-80.362	53.759
-171.027	19.235
0.000	0.000
-72.255	26.249
-164.055	14.560
0.000	0.000
-75.466	111.571
-174.144	39.205
0.000	0.000
-72.474	19.925
-170.538	12.166
0.000	0.000
-80.623	110.476
-172.147	29.275
0.000	0.000
-77.159	139.488
-176.820	36.056
0.000	0.000
-80.676	135.794
-172.875	40.311
0.000	0.000
-76.961	97.514
-169.992	34.525
0.000	0.000
-75.005	57.974
-175.236	24.083
0.000	0.000
-73.374	150.283
-171.573	54.589
0.000	1.000
-79.114	79.429
-170.538	24.331
0.000	0.000
-77.506	360.538
-169.992	86.313
0.000	0.000
-71.222	105.622
-174.289	40.200
0.000	1.000
-81.591	116.250
-175.236	36.125
0.000	0.000
-72.719	94.255
-174.806	33.136
0.000	0.000
-72.613	207.480
-175.156	59.211
0.000	0.000
-72.897	54.406
-173.290	34.234
0.000	0.000
-63.435	11.180
-168.690	10.198
0.000	0.000
-78.499	235.733
-172.349	67.602
0.000	0.000
-75.362	138.495
-168.887	57.070
0.000	0.000
-73.350	223.365
0.000	0.000
0.000	0.000
-79.160	382.832
-174.560	84.380
0.000	0.000
-75.885	176.324
-168.366	69.426
0.000	1.000
-76.608	86.348
0.000	0.000
0.000	0.000
-83.660	45.277
-177.274	21.024
0.000	0.000
-78.832	237.497
-172.117	65.620
0.000	0.000
-76.201	58.694
-170.134	23.345
0.000	0.000
-78.690	30.594
-173.290	17.117
0.000	0.000
-76.373	33.956
-160.017	11.705
0.000	0.000
-74.609	184.621
0.000	0.000
0.000	0.000

## Sheet: 210304_12uM_3s_009
											3.14159	s	µm	µm/s	s	µm	s	s	Event/min	Event/min	%			Growth rate			Shrink rate			Catastrophe			Rescue
angle raw	length raw		angle pol	angle depol	angle pause	length pol	length depol	length pause	N of Cata	N of rescue	G rate	G duration	G distance	S rate	S duration	S distance	Pause dur.	Time G+S	Freq Cata	Freq Rescue	% in pause			mean	SD	N	mean	SD	N	mean	SD	N	mean	SD	N
-72.272	128.082		-72.272	-169.875	0	128.082	56.886	0	2	1	0.0115084	365.999	4.21209	0.201593	30.001	6.04801	0	396	0.32787	1.99993	0		second	0.00821502	0.00227654	269	0.239748	0.12889	269	0.00357124	0.00281434	269	0.0762983	0.0656229	269
-169.875	56.886		-75.256	-174.094	0	58.941	29.155	0	1	0	0.00947397	171.001	1.62006	0.348008	8.99986	3.13203	0	180.001	0.350876	0	0		minute	0.492901	0.136592	269	14.3849	7.7334	269	0.214274	0.16886	269	4.5779	3.93737	269
0.000	0.000		-78.179	0	0	131.795	0	0	0	0	0.00753456	387	2.91587		0	0	0	387	0		0
-75.256	58.941		-71.565	-167.471	0	129.653	46.098	0	1	0	0.012	368.999	4.428	0.161997	30.0006	4.86003	0	398.999	0.162602	0	0			Growth duration			Shrink duration
-174.094	29.155		-74.055	-173.991	0	65.521	19.105	0	1	0	0.0102854	189	1.94395	0.342	6	2.052	0	195	0.31746	0	0			mean	SD	N	mean	SD	N		TOTAL G+S	G dur	S dur.
0.000	0.000		-72.335	-167.989	0	164.77	48.052	0	1	0	0.0114648	471.002	5.39996	0.169207	29.9988	5.076	0	501.001	0.127388	0	0		sec	280.015	220.668	269	13.1065	11.2726	269	sec	78849.6	75324	3525.64
-78.179	131.795		-73.61	-168.69	0	17.72	10.198	0	1	0	0.0105885	50.9997	0.540013	0.179999	6.00001	1.08	0	56.9998	1.17648	0	0		min	4.66691	3.67779	269	0.218441	0.187877	269	min	1314.16	1255.4	58.7606
0.000	0.000		-76.122	-170.538	90	87.556	30.414	1	1	0	0.00889442	255	2.26808	0.216007	14.9996	3.24002	3	270	0.235294	0	1.11111
0.000	0.000		-78.198	-167.005	0	68.447	13.342	0	1	0	0.0075221	201	1.51194	0.155995	9.00049	1.40403	0	210.001	0.298507	0	0			G	C	S	R				TOTAL L G+S	G length	S length
-71.565	129.653		-73.796	-162.646	0	121.84	33.526	0	1	0	0.0104617	350.999	3.67205	0.1152	29.9999	3.45599	0	380.999	0.17094	0	0			0.00821502	0.00357124	0.239748	0.0762983			µm	1289.36	587.574	701.787
-167.471	46.098		-76.504	-175.914	0	12.855	14.036	0	1	0	0.00864017	37.5001	0.324007	0.503952	3.00035	1.51203	0	40.5004	1.6	0	0			mean	SD	N
0.000	0.000		-77.869	-170.311	0	54.722	20.797	0	1	0	0.0077381	160.5	1.24197	0.210852	10.5004	2.21404	0	171.001	0.373831	0	0		AVG Cata	0.36066	0.337912	269
-74.055	65.521		-79.592	-172.875	0	24.91	12.093	0	1	0	0.00661243	73.5004	0.486017	0.288	4.49985	1.29596	0	78.0003	0.816322	0	0		AVG Rescue	0.367054	2.03632	269
-173.991	19.105		-77.05	-168.69	0	95.94	30.594	0	1	0	0.00827816	280.5	2.32202	0.179999	18	3.23999	0	298.5	0.213904	0	0		AVG %pause	0.486216	4.95482	269			<L>	J
0.000	0.000		-74.851	-167.542	0	118.622	44.037	0	1	0	0.00974657	343.499	3.34795	0.162951	28.4995	4.64401	0	371.999	0.174673	0	0								8.58543	-0.00287223
-72.335	164.770		-67.834	-173.089	0	43.732	16.621	0	1	0	0.0146664	121.5	1.78197	0.29701	5.99989	1.78203	0	127.5	0.493828	0	0		Total pause duration		5.575		EVENTs
-167.989	48.052		-73.686	-163.61	0	21.36	8.86	0	1	0	0.0105367	61.4999	0.648005	0.122396	7.50019	0.917995	0	69.0001	0.975611	0	0		number of pause		15		Cat/min	Rescue/min	Pause/min		Cat/µm	Rescue/µm	Pause/µm
0.000	0.000		-76.608	-170.407	0	107.935	36.003	1	1	0	0.00857109	315	2.6999	0.213003	17.9995	3.83395	0	333	0.190476	0	0						0.205512	0.510546	0.0114141		0.439094	0.042748	0.0116337
-73.610	17.720		-77.692	-173.66	-90	56.294	18.111	1	1	0	0.00785453	165	1.296	0.32401	5.9999	1.94403	3	171	0.363636	0	1.75438
-168.690	10.198		-75.362	-167.905	0	138.495	42.953	0	1	0	0.00940279	401.999	3.77992	0.167996	27.0002	4.53595	0	428.999	0.149254	0	0		pause dur./GS duration		0.00424225	min/min
0.000	0.000		-79.548	-175.426	90	104.738	25.08	4	1	0	0.00664101	309	2.05208	0.449992	6.00013	2.70001	12	315	0.194175	0	3.80952		N pause / GS duration		0.0114141	event/min	0.0114141	by count	0.0114141	by count			0.0116337	by count
-76.122	87.556		-77.692	-168.111	0	56.294	19.416	0	1	0	0.00785453	165	1.296	0.170995	12	2.05195	0	177	0.363636	0	0
-170.538	30.414		-73.664	-168.232	0	60.44	24.515	0	1	0	0.0105517	174	1.83599	0.172804	14.9995	2.59197	0	188.999	0.344828	0	0		Counting
90.000	1.000		-77.276	-173.884	0	63.561	28.16	0	1	0	0.00812879	186	1.51196	0.335972	9.00065	3.02397	0	195.001	0.32258	0	0		Catastrophe	Rescue	Pause	N of kymos	Frames ?
-78.198	68.447		-81.573	-169.695	0	27.295	11.18	0	1	0	0.00533335	81.0009	0.432007	0.197997	5.99991	1.18796	0	87.0008	0.740732	0	0		258	30	15		401
-167.005	13.342		-74.219	-166.373	0	95.603	33.956	0	1	0	0.0101741	275.999	2.80803	0.1485	24.0001	3.56402	0	299.999	0.217392	0	0
0.000	0.000		-78.906	-171.87	0	51.971	28.284	0	1	0	0.007059	152.999	1.08002	0.252003	11.9997	3.02397	0	164.999	0.392158	0	0
-73.796	121.840		-77.391	-171.87	0	77.878	21.213	0	1	0	0.00805288	227.999	1.83605	0.252003	8.9998	2.26798	0	236.999	0.263159	0	0
-162.646	33.526		-82.747	-174.56	0	110.887	21.095	0	1	0	0.00458169	329.999	1.51196	0.378023	5.99963	2.268	0	335.999	0.181819	0	0
0.000	0.000		-73.811	0	0	64.56	1	1	0	0	0.0104515	186	1.94397		0	-0.108	0	186	0		0
-76.504	12.855		-75.833	-164.876	0	106.231	38.328	0	1	0	0.00908733	309	2.80799	0.1332	30.0003	3.99605	0	339.001	0.194174	0	0
-175.914	14.036		-74.275	-160.821	0	107.005	24.352	0	1	1	0.0101361	309.001	3.13206	0.1035	24.0004	2.48404	0	333.001	0.194174	2.49996	0
0.000	0.000		-75.87	0	0	147.462	0	0	0	0	0.00906261	429.001	3.88787		0	0	0	429.001	0		0
-77.869	54.722		-75.964	-171.573	0	37.108	27.295	0	1	0	0.00899983	108	0.971985	0.242999	12.0002	2.91603	0	120	0.555554	0	0
-170.311	20.797		-74.32	-171.469	0	59.203	20.224	0	1	0	0.0101056	170.999	1.72805	0.239993	9.00036	2.16003	0	180	0.350878	0	0
0.000	0.000		-75.719	-167.471	0	113.508	36.878	0	1	0	0.00916356	330.001	3.02399	0.161997	24.0002	3.88798	0	354.001	0.181818	0	0
-79.592	24.910		-79.919	-165.379	0	91.411	23.77	0	1	0	0.00640025	269.999	1.72807	0.137999	18.0004	2.48403	0	288	0.222223	0	0
-172.875	12.093		-76.866	-175.236	0	30.806	12.042	0	1	0	0.00839998	90.0005	0.756003	0.431967	3.00033	1.29604	0	93.0008	0.666663	0	0
0.000	0.000		-79.046	-175.236	0	31.575	12.042	0	1	0	0.00696769	92.9991	0.64799	0.431967	3.00033	1.29604	0	95.9994	0.645167	0	0
-77.050	95.940		-75.556	-170.134	0	68.154	23.345	0	1	0	0.00927269	197.999	1.83599	0.206996	12.0001	2.48397	0	209.999	0.303031	0	0
-168.690	30.594		-81.793	-177.614	0	105.076	24.021	0	1	0	0.00519216	312	1.61996	0.863979	3.00009	2.59202	0	315	0.192308	0	0
0.000	0.000		-75.353	0	0	90.956	0	0	0	0	0.00940883	264	2.48394		0	0	0	264	0		0
-74.851	118.622		-71.952	-169.592	0	93.606	49.82	0	1	0	0.0117304	267.001	3.13204	0.195994	27.0009	5.29203	0	294.002	0.224718	0	0
-167.542	44.037		-79.695	-174.094	0	89.443	29.155	0	1	0	0.00654555	264.001	1.72803	0.348008	8.99986	3.13203	0	273.001	0.227272	0	0
0.000	0.000		-74.249	-171.254	0	40.522	13.153	0	1	0	0.0101537	117.001	1.188	0.234004	5.99991	1.40401	0	123.001	0.512815	0	0
-67.834	43.732		-75.256	-168.69	0	117.881	30.594	0	1	0	0.00947397	341.998	3.24009	0.179999	18	3.23999	0	359.998	0.175439	0	0
-173.089	16.621		-72.35	-173.66	0	23.087	18.111	0	1	0	0.0114544	66.0006	0.756002	0.32401	5.9999	1.94403	0	72.0005	0.909082	0	0
0.000	0.000		-73.61	-166.759	0	106.32	34.928	0	1	0	0.0105885	305.998	3.24008	0.152994	24.0005	3.67194	0	329.999	0.196079	0	0
-73.686	21.360		-73.301	-167.905	0	31.321	14.318	0	1	0	0.0107998	90.0003	0.971989	0.167996	9.00029	1.51202	0	99.0006	0.666664	0	0
-163.610	8.860		-77.781	-173.418	0	160.639	26.173	0	1	1	0.00779596	471	3.6719	0.311997	9.00025	2.80805	0	480	0.127389	6.66648	0
0.000	0.000		-75.209	-167.093	0	184.101	49.244	0	1	0	0.00950555	534.002	5.07598	0.157096	32.9988	5.18398	0	567	0.112359	0	0
-76.608	107.935		-75.392	-161.917	0	194.281	51.546	0	1	0	0.00938266	564.002	5.29184	0.110253	47.9988	5.292	0	612.001	0.106383	0	0
-170.407	36.003		-81.363	-173.29	0	79.906	17.117	0	1	0	0.00546826	237	1.29598	0.305992	6.00006	1.83597	0	243	0.253165	0	0
-165.964	35.046		-77.242	-162.897	0	54.342	13.601	0	1	0	0.00815124	159.001	1.29606	0.116998	11.9998	1.40395	0	171.001	0.377356	0	0
-77.692	56.294		-78.067	-170.134	0	198.285	46.69	0	1	1	0.00760804	582	4.42789	0.206996	24.0002	4.96795	0	606	0.103093	2.49998	0
-173.660	18.111		-74.31	-170.538	-90	46.222	15.207	0.5	1	0	0.0101124	133.499	1.34999	0.216007	7.49979	1.62001	1.5	140.999	0.449441	0	1.06384
180.000	1.000		-80.949	-173.29	0	57.212	17.117	0	1	0	0.00573469	169.499	0.972024	0.305992	6.00006	1.83597	0	175.499	0.353985	0	0
-75.362	138.495		-74.634	0	0	67.928	0	0	0	0	0.00989306	196.499	1.94398		0	0	0	196.499	0		0
-167.905	42.953		-80.272	-169.216	0	106.532	21.378	0	1	0	0.00617169	315.001	1.94409	0.189005	11.9999	2.26805	0	327	0.190476	0	0
0.000	0.000		-78.043	-171.469	0	86.885	20.224	0	1	0	0.00762379	255	1.94407	0.239993	9.00036	2.16003	0	264	0.235294	0	0
-79.548	104.738		-72.646	-165.964	90	33.526	20.616	1	1	0	0.01125	95.9997	1.07999	0.144002	15.0001	2.16005	3	111	0.625002	0	2.70271
-175.426	25.080		-77.55	-170.91	0	78.854	25.318	0	1	0	0.00794805	230.999	1.83599	0.225007	11.9996	2.7	0	242.999	0.259741	0	0
75.964	4.123		-78.321	-163.179	0	182.784	44.922	0	1	0	0.00744147	537	3.99607	0.11908	38.9989	4.64399	0	575.998	0.111732	0	0
-77.692	56.294		-71.012	-169.315	0	49.176	26.968	0	1	0	0.0123873	139.501	1.72804	0.190798	15.0004	2.86204	0	154.501	0.430106	0	0
-168.111	19.416		-73.563	-166.43	0	136.061	44.749	0	1	0	0.0106206	391.501	4.15799	0.149148	31.4988	4.69798	0	423	0.153256	0	0
0.000	0.000		-77.3	-172.614	0	36.39	27.226	0	1	0	0.00811294	106.499	0.864022	0.277716	10.5	2.91601	0	116.999	0.563385	0	0
-73.664	60.440		-76.31	-170.218	0	40.14	14.714	0	1	0	0.00876919	116.999	1.02599	0.208809	7.49972	1.56601	0	124.499	0.512825	0	0
-168.232	24.515		-77.838	-173.29	0	59.332	17.117	0	1	0	0.00775848	174.001	1.34998	0.305992	6.00006	1.83597	0	180.001	0.344826	0	0
0.000	0.000		-77.471	-174.289	0	27.659	10.05	0	1	0	0.00800012	81.001	0.648018	0.359974	3.00025	1.08001	0	84.0013	0.740731	0	0
-77.276	63.561		-79.216	-168.69	0	21.378	5.099	0	1	0	0.00685694	63.0014	0.431997	0.179999	3.00001	0.539998	0	66.0014	0.95236	0	0
-173.884	28.160		-71.565	-169.695	0	75.895	22.361	0	1	0	0.012	216.001	2.59202	0.197997	12.0003	2.37603	0	228.001	0.277777	0	0
0.000	0.000		-78.69	-170.838	0	132.575	31.401	0	1	1	0.00720004	390.001	2.80803	0.223208	14.9996	3.34804	0	405.001	0.153846	4.0001	0
-81.573	27.295		-75.515	-169.824	0	123.94	39.623	0	1	0	0.00930017	360.001	3.34807	0.200561	21.0009	4.21197	0	381.002	0.166666	0	0
-169.695	11.180		-74.476	-166.759	0	93.408	34.928	0	1	0	0.00999991	270.001	2.69999	0.152994	24.0005	3.67194	0	294.002	0.222221	0	0
0.000	0.000		-74.476	-169.287	0	112.089	37.656	0	1	0	0.00999991	323.999	3.23997	0.190288	20.9996	3.99597	0	344.999	0.185185	0	0
-74.219	95.603		-84.553	-175.786	0	389.76	95.258	0	2	2	0.0034328	1164	3.99578	0.488592	20.9992	10.2601	0	1185	0.103093	5.7145	0
-166.373	33.956		-79.733	-167.969	0	269.312	62.37	0	2	1	0.00652089	794.999	5.1841	0.168917	39.0014	6.588	0	834.001	0.150944	1.53841	0
0.000	0.000		-84.644	-169.287	0	160.702	37.656	0	1	0	0.00337511	480.001	1.62006	0.190288	20.9996	3.99597	0	501.001	0.125	0	0
-78.906	51.971		-75.964	-169.695	0	70.093	22.361	0	1	1	0.00899983	204.001	1.83597	0.197997	12.0003	2.37603	0	216.001	0.294116	4.99985	0
-171.870	28.284		-75.677	0	0	97.015	0	0	0	0	0.00919167	281.998	2.59204		0	0	0	281.998	0		0
0.000	0.000		-81.87	-165.964	0	14.142	16.492	0	1	0	0.00514279	41.9996	0.215995	0.144002	11.9995	1.72796	0	53.9991	1.42858	0	0
-77.391	77.878		-79.287	-168.69	0	37.656	10.198	0	1	0	0.00681072	110.999	0.755985	0.179999	6.00001	1.08	0	116.999	0.540545	0	0
-171.870	21.213		-71.996	-169.261	0	168.238	59.034	0	1	0	0.0116999	480.001	5.61595	0.189816	33.0004	6.26401	0	513.001	0.125	0	0
0.000	0.000		-79.261	-172.405	0	59.034	15.133	0	1	0	0.00682765	174	1.18801	0.269987	6.00038	1.62003	0	180.001	0.344827	0	0
-82.747	110.887		-71.565	-173.29	0	34.785	17.117	0	1	0	0.012	98.9998	1.188	0.305992	6.00006	1.83597	0	105	0.606062	0	0
-174.560	21.095		-79.509	-169.695	0	27.459	11.18	0	1	0	0.00666635	80.9999	0.539975	0.197997	5.99991	1.18796	0	86.9999	0.740741	0	0
0.000	0.000		-73.56	-170.538	0	63.6	18.248	0	1	0	0.0106227	182.999	1.94395	0.216007	8.99955	1.94397	0	191.999	0.32787	0	0
-73.811	64.560		-75.763	-172.875	0	69.123	24.187	0	1	0	0.00913413	201	1.83596	0.288	9.00006	2.59202	0	210	0.298507	0	0
0.000	1.000		-78.389	-174.806	0	74.525	22.091	0	1	0	0.00739693	219	1.61993	0.396032	5.99958	2.37603	0	224.999	0.273973	0	0
0.000	1.000		-80.538	-172.235	0	33.455	22.204	0	1	0	0.00599979	98.9995	0.593977	0.264005	8.99997	2.37604	0	107.999	0.606064	0	0
-75.833	106.231		-77.26	-172.875	0	58.951	20.156	0	1	0	0.00813936	172.499	1.40403	0.288	7.50012	2.16004	0	179.999	0.347828	0	0
-164.876	38.328		-76.239	-171.254	0	75.672	19.729	0	1	0	0.00881646	220.5	1.94403	0.234004	8.99964	2.10596	0	229.499	0.272109	0	0
0.000	0.000		-79.399	-175.601	0	95.124	19.558	0	1	0	0.00673786	280.501	1.88998	0.467968	4.50039	2.10604	0	285.002	0.213903	0	0
-74.275	107.005		-87.32	-174.289	0	235.257	20.1	0	2	3	0.00168512	704.999	1.18801	0.359974	6.0005	2.16003	0	711	0.170213	29.9975	0
-160.821	24.352		-80.998	-168.311	0	102.259	29.614	0	1	0	0.00570312	302.998	1.72804	0.174005	17.9993	3.13198	0	320.998	0.198021	0	0
0.000	0.000		-71.372	-169.695	0	93.92	33.541	0	1	0	0.0121349	266.999	3.24002	0.197997	18.0003	3.564	0	285	0.22472	0	0
-75.870	147.462		-83.746	-169.38	-90	73.437	16.279	59	1	0	0.00394518	219	0.863995	0.191993	9.00039	1.72802	177	228	0.273973	0	77.6315
0.000	0.000		-73.101	-171.87	0	82.565	28.284	0	1	0	0.0109369	236.999	2.59205	0.252003	11.9997	3.02397	0	248.999	0.253165	0	0
0.000	0.000		-76.464	-173.66	0	55.543	18.111	0	1	0	0.00866675	162.001	1.40402	0.32401	5.9999	1.94403	0	168	0.370369	0	0
-75.964	37.108		-84.472	-174.289	0	62.29	10.05	0	1	0	0.00348416	186.001	0.648057	0.359974	3.00025	1.08001	0	189.001	0.322579	0	0
-171.573	27.295		-84.289	-168.69	0	30.15	10.198	0	1	0	0.00360025	90.001	0.324027	0.179999	6.00001	1.08	0	96.0011	0.666659	0	0
0.000	0.000		-78.038	-171.87	0	120.619	35.355	0	1	0	0.00762708	353.999	2.69998	0.252003	14.9997	3.77996	0	368.999	0.169492	0	0
-74.320	59.203		-77.471	-169.38	0	138.293	32.558	0	1	0	0.00800012	404.999	3.24005	0.191993	18.0008	3.45603	0	423	0.148148	0	0
-171.469	20.224		-76.608	-168.69	0	43.174	10.198	0	1	0	0.00857109	126	1.07996	0.179999	6.00001	1.08	0	132	0.47619	0	0
0.000	0.000		-79.992	-171.027	0	69.051	19.235	0	1	0	0.00635295	204.001	1.29601	0.22799	9.00019	2.05196	0	213.001	0.294116	0	0
-75.719	113.508		-75.033	-173.66	0	104.547	27.166	0	1	0	0.00962394	303.001	2.91606	0.32401	8.99968	2.91598	0	312	0.198019	0	0
-167.471	36.878		-76.373	-172.405	0	33.956	15.133	0	1	0	0.00872727	99.0004	0.864004	0.269987	6.00038	1.62003	0	105.001	0.606058	0	0
0.000	0.000		-74.407	0	0	44.643	0	0	0	0	0.0100466	129	1.29601		0	0	0	129	0		0
-79.919	91.411		-78.93	-172.147	0	93.744	29.275	0	1	0	0.00704334	275.999	1.94396	0.26101	11.9997	3.13205	0	287.999	0.217392	0	0
-165.379	23.770		-73.644	-170.218	0	95.88	29.428	0	1	0	0.0105653	275.999	2.91603	0.208809	14.9994	3.13202	0	290.999	0.217392	0	0
0.000	0.000		-76.329	-172.405	0	38.079	15.133	0	1	0	0.00875654	111.001	0.971982	0.269987	6.00038	1.62003	0	117.001	0.540538	0	0
-76.866	30.806		-81.741	-167.905	0	62.65	14.318	0	1	0	0.00522552	186.001	0.971952	0.167996	9.00029	1.51202	0	195.001	0.322579	0	0
-175.236	12.042		-77.905	-167.661	0	100.225	32.757	0	1	0	0.00771444	294	2.26805	0.164572	21.0001	3.45604	0	315.001	0.204081	0	0
0.000	0.000		-79.574	0	0	127.098	0	0	0	0	0.00662412	374.999	2.48404		0	0	0	374.999	0		0
-79.046	31.575		-75.184	-174.289	0	80.165	25.125	0	1	0	0.00952236	232.499	2.21394	0.359974	7.50063	2.70003	0	240	0.258066	0	0
-175.236	12.042		-75.964	-170.134	0	12.369	11.673	0	1	0	0.00899983	35.9991	0.323986	0.206996	6.00031	1.24204	0	41.9994	1.66671	0	0
0.000	0.000		-75.417	-172.093	0	63.547	18.173	0.5	1	0	0.00936588	184.499	1.728	0.259205	7.49994	1.94402	0	191.999	0.325204	0	0
-75.556	68.154		-62.354	-171.254	0	11.853	6.576	0	1	0	0.0188571	31.4993	0.593987	0.234004	2.99973	0.70195	0	34.499	1.90481	0	0
-170.134	23.345		-77.125	-167.005	0	17.951	6.671	0	1	0	0.00822856	52.4991	0.431992	0.155995	4.50024	0.702017	0	56.9993	1.14288	0	0
0.000	0.000		-79.54	-173.991	0	33.049	9.552	0	1	0	0.00664621	97.4994	0.648002	0.342	2.99984	1.02595	0	100.499	0.615389	0	0
-81.793	105.076		-73.393	-171.027	0	29.741	9.618	0	1	0	0.0107368	85.5013	0.918015	0.22799	4.50033	1.02603	0	90.0016	0.701744	0	0
-177.614	24.021		-76.884	-166.608	0	52.88	10.794	0	1	0	0.00838805	154.502	1.29597	0.151206	7.50006	1.13405	0	162.002	0.388346	0	0
0.000	0.000		-78.212	-166.675	0	58.739	19.526	0	1	0	0.00751292	172.501	1.29598	0.151994	13.5007	2.05204	0	186.001	0.347825	0	0
-75.353	90.956		-77.619	-169.695	0	41.976	11.18	0	1	0	0.00790259	122.999	0.972015	0.197997	5.99991	1.18796	0	128.999	0.487807	0	0
0.000	0.000		-78.311	-171.87	0	29.614	14.142	0	1	0	0.00744803	86.9996	0.647976	0.252003	5.99987	1.51199	0	92.9994	0.689659	0	0
0.000	0.000		-82.235	-161.565	0	22.204	6.325	0	1	0	0.00490898	66.0012	0.323999	0.108	6.00044	0.648045	0	72.0016	0.909074	0	0
-71.952	93.606		-77.471	-167.471	0	92.195	27.659	0	1	0	0.00800012	269.998	2.16002	0.161997	18.0005	2.91604	0	287.999	0.222223	0	0
-169.592	49.820		-84.726	-171.573	0	65.276	27.295	0	1	0	0.00332314	194.999	0.648009	0.242999	12.0002	2.91603	0	206.999	0.307694	0	0
0.000	0.000		-78.69	-170.538	0	96.881	24.331	0	1	0	0.00720004	284.999	2.052	0.216007	11.9996	2.592	0	296.998	0.210527	0	0
-79.695	89.443		-74.476	-170.538	0	18.682	12.166	0	1	0	0.00999991	54.0014	0.540009	0.216007	6.00003	1.29605	0	60.0014	1.11108	0	0
-174.094	29.155		-75.005	0	0	115.948	0	0	0	0	0.00964279	335.999	3.23998		0	0	0	335.999	0		0
0.000	0.000		-74.876	-168.503	0	76.655	30.104	0	1	0	0.00972972	222	2.16	0.176993	18.0007	3.186	0	240	0.270271	0	0
-74.249	40.522		-77.166	-166.139	0	173.33	39.655	0	1	1	0.00820146	506.999	4.15814	0.145895	28.5001	4.15803	0	535.5	0.118343	2.10525	0
-171.254	13.153		-75.903	0	-90	114.962	0	23	0	0	0.00904056	334.5	3.02407		0	0	69	334.5	0		20.6278
0.000	0.000		-78.959	-172.875	-90	125.32	32.249	1	1	0	0.00702442	369.001	2.59202	0.288	12	3.456	3	381.001	0.162601	0	0.787399
-75.256	117.881		-76.661	-168.996	0	99.69	36.674	0	1	0	0.00853591	291.002	2.48397	0.185135	21.0007	3.88797	0	312.002	0.206184	0	0
-168.690	30.594		-75.964	0	0	90.708	0	0	0	0	0.00899983	263.999	2.37595		0	0	0	263.999	0		0
0.000	0.000		-78.311	-169.695	0	29.614	11.18	0	1	0	0.00744803	86.9996	0.647976	0.197997	5.99991	1.18796	0	92.9995	0.689659	0	0
-72.350	23.087		-74.476	-168.69	0	56.045	25.495	0	1	0	0.00999991	162.001	1.62	0.179999	15	2.69999	0	177.001	0.370368	0	0
-173.660	18.111		-85.03	-165.964	0	23.087	8.246	0	1	0	0.0031306	69.0006	0.216013	0.144002	5.99974	0.863979	0	75.0003	0.869558	0	0
0.000	0.000		-75.964	-170.538	0	16.492	12.166	0	1	0	0.00899983	47.9988	0.431982	0.216007	6.00003	1.29605	0	53.9989	1.25003	0	0
-73.610	106.320		-73.74	-172.147	0	100	29.275	0	1	0	0.0104998	288	3.02396	0.26101	11.9997	3.13205	0	300	0.208333	0	0
-166.759	34.928		-76.43	-171.28	0	29.833	9	0	0	0	0.00868936	87.0005	0.75598	0.234713	4.09336	0.960765	0	91.0939	0	0	0
0.000	0.000		-76.185	-173.29	0	62.817	17.117	0	1	0	0.00885243	182.999	1.61999	0.305992	6.00006	1.83597	0	189	0.32787	0	0
-73.301	31.321		-77.471	-172.55	0	27.659	10	0	1	0	0.00800012	81.001	0.648018	0.275303	3.88983	1.07088	0	84.8908	0.740731	0	0
-167.905	14.318		-77.005	0	0	53.367	0	0	0	0	0.00830794	156.001	1.29605		0	0	0	156.001	0		0
0.000	0.000		-75.483	-171.416	0	57.847	26.8	0	1	0	0.00932162	168	1.56604	0.238489	12.0004	2.86198	0	180.001	0.357142	0	0
-77.781	160.639		-75.964	-169.426	-90	296.864	76.295	1	1	1	0.00899983	864.002	7.77588	0.192848	42.0016	8.09994	3	906.004	0.0694443	1.42852	0.331124
-173.418	26.173		-79.788	-171.416	0	276.378	53.6	0	1	0	0.0064852	815.999	5.29192	0.238489	24.0009	5.72395	0	840	0.0735295	0	0
0.000	0.000		-77.619	-167.905	0	41.976	14.318	0	1	0	0.00790259	122.999	0.972015	0.167996	9.00029	1.51202	0	132	0.487807	0	0
-75.209	184.101		-75.512	-171.573	0	153.894	40.942	0	1	0	0.00930218	447.001	4.15808	0.242999	18.0001	4.374	0	465.001	0.134228	0	0
-167.093	49.244		-77.391	-169.695	0	38.939	11.18	0	1	0	0.00805288	114	0.918027	0.197997	5.99991	1.18796	0	120	0.526317	0	0
0.000	0.000		-85.339	-168.69	0	92.305	17.847	0	1	0	0.00293507	275.999	0.810077	0.179999	10.5003	1.89005	0	286.5	0.217392	0	0
-75.392	194.281		-81.808	-172.057	0	393.01	86.833	0	1	0	0.00518254	1167	6.04803	0.258015	35.9978	9.28799	0	1203	0.0514139	0	0
-161.917	51.546		-79.611	-167.989	0	122	48.052	0	1	0	0.00660009	360	2.37603	0.169207	29.9988	5.076	0	389.999	0.166667	0	0
0.000	0.000		-79.287	-162.474	0	75.313	19.925	0	1	0	0.00681072	222.001	1.51199	0.113997	18.0006	2.05201	0	240.002	0.270269	0	0
-81.363	79.906		-79.695	-167.471	0	33.541	18.439	0	1	0	0.00654555	98.9999	0.648009	0.161997	12.0001	1.94399	0	111	0.606061	0	0
-173.290	17.117		-77.32	-170.538	0	123	30.414	0	1	0	0.00809974	360.001	2.91591	0.216007	14.9996	3.24002	0	375	0.166666	0	0
0.000	0.000		-82.288	-170.538	0	96.876	18.248	0	1	0	0.00487506	287.999	1.40402	0.216007	8.99955	1.94397	0	296.999	0.208334	0	0
-77.242	54.342		-75.292	0	0	82.71	0	0	0	0	0.00944979	239.999	2.26794		0	0	0	239.999	0		0
-162.897	13.601		-74.876	-177.274	0	76.655	21.024	0	1	0	0.00972972	222	2.16	0.756086	2.99969	2.26802	0	224.999	0.270271	0	0
0.000	0.000		-76.441	-169.461	0	174.874	43.738	0	1	1	0.00868204	510	4.42785	0.193503	23.9997	4.64402	0	534	0.117647	2.50003	0
-78.067	198.285		-81.327	-169.992	0	59.682	34.525	0	1	0	0.00549141	176.999	0.971973	0.203999	17.9999	3.67196	0	194.998	0.338986	0	0
-170.134	46.690		-68.199	-172.875	0	16.155	8.062	0	1	0	0.0143997	44.9988	0.647969	0.288	2.9999	0.863972	0	47.9986	1.33337	0	0
0.000	0.000		-75.411	-166.504	0	226.296	51.42	0	1	0	0.00936991	656.999	6.15603	0.149997	36.0008	5.40001	0	693	0.0913243	0	0
-74.310	46.222		-82.799	-167.471	0	374.957	36.878	0	1	1	0.00454849	1116	5.07612	0.161997	24.0002	3.88798	0	1140	0.0537635	2.49997	0
-170.538	15.207		-76.458	-168.147	0	337.38	82.765	0	1	1	0.00867074	984.001	8.53203	0.171529	51.0002	8.74803	0	1035	0.0609755	1.17647	0
180.000	0.500		-77.32	-164.745	0	41	11.402	0	1	0	0.00809974	120	0.971971	0.132001	9.00013	1.18803	0	129	0.499999	0	0
-80.949	57.212		-73.009	-165.069	0	37.643	15.524	0	1	0	0.0110001	108	1.18801	0.135004	11.9995	1.61998	0	119.999	0.555557	0	0
-173.290	17.117		-75.964	-169.046	0	127.816	31.575	0	1	0	0.00899983	372	3.34794	0.186001	17.9997	3.34797	0	389.999	0.16129	0	0
0.000	0.000		-78.559	-172.235	0	85.703	22.204	0	1	0	0.00728568	252	1.83599	0.264005	8.99997	2.37604	0	261	0.238095	0	0
-74.634	67.928		-72.672	-169.461	0	130.943	43.738	2	1	0	0.011232	375.001	4.21203	0.193503	23.9997	4.64402	0	399	0.16	0	0
0.000	0.000		-72.499	-168.69	0	116.387	35.693	0	1	0	0.0113514	332.999	3.78002	0.179999	21	3.77998	0	353.999	0.180181	0	0
0.000	0.000		-78.69	-172.875	0	35.693	8.062	0	1	0	0.00720004	105	0.756002	0.288	2.9999	0.863972	0	107.999	0.571431	0	0
-80.272	106.532		-75.888	-169.066	0	184.57	44.814	0	1	0	0.00905058	537	4.86016	0.18635	25.5007	4.75205	0	562.5	0.111732	0	0
-169.216	21.378		-82.648	-167.905	-90	31.257	14.318	1	1	0	0.00464491	93.0001	0.431978	0.167996	9.00029	1.51202	3	102	0.645161	0	2.94117
0.000	0.000		-75.964	-171.469	0	49.477	20.224	0	1	0	0.00899983	143.999	1.29597	0.239993	9.00036	2.16003	0	153	0.416668	0	0
-78.043	86.885		-76.707	-164.219	0	187.011	47.802	0	1	0	0.00850539	546.001	4.64396	0.127382	39.0009	4.96803	0	585.002	0.10989	0	0
-171.469	20.224		-82.142	-168.996	0	387.64	73.348	0	1	0	0.00496851	1152	5.72373	0.185135	42.0015	7.77594	0	1194	0.0520833	0	0
0.000	0.000		-75.15	-165.069	0	273.123	62.097	0	1	1	0.00954522	792.002	7.55984	0.135004	47.9989	6.48004	0	840.001	0.0757574	1.25003	0
-72.646	33.526		-79.33	-171.384	0	140.428	33.377	0	1	0	0.00678274	414	2.80806	0.23759	15.0008	3.56404	0	429.001	0.144928	0	0
-165.964	20.616		-76.171	-170.789	0	133.881	37.483	0	1	0	0.00886176	390.001	3.4561	0.222	17.9998	3.99597	0	408.001	0.153846	0	0
90.000	1.000		-85.601	-173.66	0	19.558	4.528	0	1	0	0.00276941	58.5012	0.162014	0.32401	1.50006	0.486033	0	60.0012	1.02562	0	0
-77.550	78.854		-78.214	-161.565	0	129.735	34.785	0	1	0	0.0075116	381	2.86192	0.108	33	3.56399	0	414	0.157481	0	0
-170.910	25.318		-78.408	-166.504	0	59.718	12.855	0	1	0	0.00738449	175.5	1.29598	0.149997	9.0002	1.35	0	184.5	0.341881	0	0
0.000	0.000		-80.446	-173.884	0	51.21	14.08	0	1	0	0.00605921	151.499	0.917966	0.335972	4.50032	1.51198	0	155.999	0.396042	0	0
-78.321	182.784		-77.005	-173.36	0	26.683	13	0	1	0	0.00830794	77.9989	0.648011	0.309248	4.50959	1.39458	0	82.5085	0.769241	0	0
-163.179	44.922		-76.608	-171.87	0	64.761	21.213	0	1	0	0.00857109	189	1.61994	0.252003	8.9998	2.26798	0	198	0.31746	0	0
0.000	0.000		-83.991	-166.293	0	229.26	42.202	0	1	0	0.00378947	684.001	2.592	0.147599	30.0002	4.42801	0	714.001	0.0877192	0	0
-71.012	49.176		-72.759	-174.289	0	60.729	20.1	0	1	0	0.0111721	174.001	1.94395	0.359974	6.0005	2.16003	0	180.001	0.344826	0	0
-169.315	26.968		-75.964	-173.66	0	12.369	4.528	0	1	0	0.00899983	35.9991	0.323986	0.32401	1.50006	0.486033	0	37.4992	1.66671	0	0
0.000	0.000		-80.074	-174.55	0	20.304	5	0	1	0	0.00629983	60.0002	0.377992	0.377325	1.42466	0.537559	0	61.4249	0.999996	0	0
-73.563	136.061		-76.551	-171.87	90	47.297	21.213	0.5	1	0	0.00860894	138	1.18804	0.252003	8.9998	2.26798	1.5	147	0.434783	0	1.02041
-166.430	44.749		-74.745	-171.254	0	57.009	19.729	0	1	0	0.00981809	165.001	1.61999	0.234004	8.99964	2.10596	0	174	0.363635	0	0
0.000	0.000		-81.634	-178.091	0	68.731	15.008	0	1	0	0.00529419	203.999	1.08001	1.08009	1.49985	1.61996	0	205.499	0.294119	0	0
-77.300	36.390		-80.754	-167.905	0	43.566	14.318	0	1	0	0.00586039	129	0.75599	0.167996	9.00029	1.51202	0	138	0.465117	0	0
-172.614	27.226		-77.932	-168.111	0	148.277	38.833	0	1	0	0.0076967	435	3.34807	0.170995	24.0007	4.104	0	459.001	0.137931	0	0
0.000	0.000		-81.254	-167.471	0	78.918	18.439	0	1	0	0.00553835	234.001	1.29598	0.161997	12.0001	1.94399	0	246.001	0.256409	0	0
-76.310	40.140		-79.695	-171.027	0	89.443	19.235	0	1	0	0.00654555	264.001	1.72803	0.22799	9.00019	2.05196	0	273.001	0.227272	0	0
-170.218	14.714		-75.964	-169.611	0	109.262	30.5	0	1	0	0.00899983	317.999	2.86194	0.196361	16.5002	3.24	0	334.5	0.18868	0	0
0.000	0.000		-80.538	-171.254	0	18.248	6.576	0	1	0	0.00599979	53.9992	0.323984	0.234004	2.99973	0.70195	0	56.9989	1.11113	0	0
-77.838	59.332		-81.754	-172.405	-90	34.86	7.566	0.5	1	0	0.00521718	103.499	0.539972	0.269987	2.99999	0.809959	1.5	106.499	0.579717	0	1.40847
-173.290	17.117		-78.366	-169.992	0	17.357	8.631	0	1	0	0.007412	51.0012	0.378021	0.203999	4.49983	0.917964	0	55.5011	1.17644	0	0
0.000	0.000		-72.474	0	0	109.587	0	0	0	0	0.0113687	313.5	3.56409		0	0	0	313.5	0		0
-77.471	27.659		-73.989	-170.838	0	59.821	15.7	0	1	0	0.0103303	172.501	1.78199	0.223208	7.49957	1.67397	0	180.001	0.347823	0	0
-174.289	10.050		-75.055	-168.179	0	137.656	43.932	1	1	0	0.00960913	398.999	3.83404	0.172007	26.999	4.64403	0	425.998	0.150376	0	0
0.000	0.000		-82.461	-164.055	0	274.372	72.801	0	1	0	0.00476442	816.001	3.88777	0.126003	59.9985	7.56	0	875.999	0.0735293	0	0
-79.216	21.378		-78.321	-170.961	0	182.784	44.553	0	1	0	0.00744147	537	3.99607	0.226298	20.9987	4.75197	0	557.998	0.111732	0	0
-168.690	5.099		-79.875	-171.87	0	85.329	21.213	0	1	0	0.00642878	252	1.62006	0.252003	8.9998	2.26798	0	261	0.238095	0	0
0.000	0.000		-84.644	-175.236	0	64.281	12.042	0	1	0	0.00337511	192.001	0.648025	0.431967	3.00033	1.29604	0	195.001	0.312498	0	0
-71.565	75.895		-79.315	-174.56	0	53.935	21.095	0	1	0	0.0067925	159	1.08001	0.378023	5.99963	2.268	0	164.999	0.37736	0	0
-169.695	22.361		-77.905	-177.11	0	14.318	8	0	1	0	0.00771444	42.0005	0.32401	0.713113	1.21005	0.862901	0	43.2105	1.42855	0	0
0.000	0.000		-71.565	-175.601	0	15.811	13.038	0	1	0	0.012	44.9989	0.539988	0.467968	3.00011	1.40396	0	47.999	1.33337	0	0
-78.690	132.575		-79.232	-168.111	0	165.922	38.833	0	1	0	0.00684652	489.001	3.34796	0.170995	24.0007	4.104	0	513.002	0.122699	0	0
-170.838	31.401		-78.579	-171.254	0	101	26.306	0	1	0	0.0072726	297	2.15997	0.234004	11.9998	2.80801	0	309	0.20202	0	0
0.000	0.000		-75.579	-176.82	0	18.069	9.014	0	1	0	0.00925729	52.499	0.485999	0.647965	1.5001	0.972013	0	53.9991	1.14288	0	0
-75.515	123.940		-76.083	-168.111	0	58.209	19.416	0	1	0	0.00892043	169.501	1.51202	0.170995	12	2.05195	0	181.501	0.353981	0	0
-169.824	39.623		-77.257	0	-90	145.073	0	17	0	0	0.00814134	424.499	3.45599		0	0	51	424.499	0		12.0142
0.000	0.000		-80.081	-172.875	0	185.777	48.374	2	1	0	0.0062953	549	3.45613	0.288	18.0001	5.18405	0	567	0.10929	0	0
-74.476	93.408		-78.425	-174.289	0	84.723	30.15	0	1	0	0.00737336	249	1.83597	0.359974	9.00075	3.24004	0	258.001	0.240964	0	0
-166.759	34.928		-80.166	0	0	76.118	0	0	0	0	0.00624028	224.999	1.40406		0	0	0	224.999	0		0
0.000	0.000		-73.788	-169.902	0	236.4	74.148	0	1	0	0.0104671	680.999	7.12811	0.202144	39.0016	7.88393	0	720	0.0881059	0	0
-74.476	112.089		-71.365	-172.093	0	90.758	36.346	1	1	0	0.0121398	258	3.13207	0.259205	14.9999	3.88805	0	272.999	0.232559	0	0
-169.287	37.656		-77.932	-167.276	0	148.277	31.78	0	1	0	0.0076967	435	3.34807	0.159433	20.9991	3.34795	0	455.999	0.137931	0	0
0.000	0.000		-77.196	-168.111	0	45.122	19.416	0	1	0	0.00818163	132	1.07998	0.170995	12	2.05195	0	144	0.454546	0	0
-84.553	389.760		-77.3	-169.216	0	36.39	10.689	0	1	0	0.00811294	106.499	0.864022	0.189005	5.99996	1.13402	0	112.499	0.563385	0	0
-175.786	95.258		-77.11	-168.486	0	103.098	27.554	0	1	0	0.00823848	301.5	2.4839	0.176724	16.4999	2.91595	0	318	0.199005	0	0
0.000	0.000		-81.511	-174.174	0	67.742	16.418	0	1	0	0.00537317	201	1.08	0.352821	4.99966	1.76399	0	205.999	0.298508	0	0
-79.733	269.312		-75.124	-173.884	0	33.11	14.08	0	1	0	0.0095627	96.0008	0.918028	0.335972	4.50032	1.51198	0	100.501	0.624995	0	0
-167.969	62.370		-78.774	-171.384	0	66.778	16.688	0	1	0	0.00714516	196.501	1.40403	0.23759	7.50016	1.78196	0	204.001	0.305342	0	0
0.000	0.000		-74.085	0	0	129.462	0	0	0	0	0.010265	373.499	3.83399		0	0	0	373.499	0		0
-84.644	160.702		-75.046	0	0	166.643	0	0	0	0	0.00961519	482.998	4.64412		0	0	0	482.998	0		0
-169.287	37.656		-79.919	-170.538	0	137.117	36.497	0	1	0	0.00640025	405	2.59211	0.216007	17.9996	3.88805	0	423	0.148148	0	0
0.000	0.000		-78.398	-165.324	0	154.149	43.417	0	1	0	0.00739104	452.998	3.34813	0.137458	32.9994	4.53605	0	485.998	0.132451	0	0
-75.964	70.093		-86.09	-168.69	0	395.922	91.782	0	5	5	0.00246054	1185	2.91575	0.179999	54.0001	9.71996	0	1239	0.253164	5.55554	0
-169.695	22.361		-73.393	-167.196	0	59.481	22.561	0	1	0	0.0107368	171	1.836	0.158403	14.9997	2.376	0	185.999	0.350878	0	0
0.000	0.000		-76.938	-165.964	0	128.32	37.108	0	1	1	0.00835229	375	3.13211	0.144002	26.9996	3.88801	0	401.999	0.16	2.22226	0
-75.677	97.015		-77.005	-168.111	0	80.05	19.416	0	1	0	0.00830794	234	1.94406	0.170995	12	2.05195	0	246	0.256411	0	0
0.000	0.000		-79.857	-170.049	0	221.461	57.871	0	1	0	0.00644045	654	4.21205	0.205192	30.0013	6.15604	0	684.001	0.0917432	0	0
0.000	0.000		-72.16	-171.634	0	91.395	34.366	0	1	0	0.0115861	261.001	3.02397	0.244796	15.0003	3.67203	0	276.001	0.229884	0	0
-81.870	14.142		-75.483	-172.235	0	115.694	44.407	0	1	0	0.00932162	336.001	3.13208	0.264005	17.9995	4.75198	0	354	0.178571	0	0
-165.964	16.492		-76.149	-169.695	0	75.186	22.361	0	1	0	0.00887642	218.999	1.94393	0.197997	12.0003	2.37603	0	230.999	0.273974	0	0
0.000	0.000		-81.87	0	0	56.569	0	0	0	0	0.00514279	168.001	0.863996		0	0	0	168.001	0		0
-79.287	37.656		-75.793	-169.509	0	162.985	54.918	0	1	0	0.00911407	474	4.32008	0.194409	29.9986	5.832	0	503.999	0.126582	0	0
-168.690	10.198		-75.155	0	0	85.866	0	0	0	0	0.00954186	249	2.37592		0	0	0	249	0		0
0.000	0.000		-78.756	-174.806	0	169.248	33.136	0	1	0	0.00715692	497.998	3.56414	0.396032	8.99924	3.56399	0	506.997	0.120482	0	0
-71.996	168.238		-84.289	-167.471	0	20.1	9.22	0	1	0	0.00360025	60.0007	0.216018	0.161997	6.00039	0.972047	0	66.0011	0.999988	0	0
-169.261	59.034		-80.895	-174.289	0	78.995	25.125	0	1	0	0.00576948	233.999	1.35005	0.359974	7.50063	2.70003	0	241.5	0.256411	0	0
0.000	0.000		-77.821	-173.367	0	71.1	21.645	0	1	0	0.00776966	208.499	1.61997	0.309577	7.50059	2.32201	0	216	0.287771	0	0
-79.261	59.034		-76.588	-174.644	0	66.823	16.07	0	1	0	0.00858437	195.002	1.67397	0.383987	4.5001	1.72798	0	199.502	0.30769	0	0
-172.405	15.133		-71.775	-170.538	0	43.165	15.207	0	1	0	0.0118536	122.999	1.45798	0.216007	7.49979	1.62001	0	130.499	0.487809	0	0
0.000	0.000		-75.548	-172.405	0	50.085	15.133	0	1	0	0.00927805	145.5	1.34996	0.269987	6.00038	1.62003	0	151.501	0.41237	0	0
-71.565	34.785		-75.315	-171.027	0	149.897	38.471	0	1	0	0.00943434	435.001	4.10396	0.22799	18.0009	4.10402	0	453.002	0.137931	0	0
-173.290	17.117		-74.798	-170.838	0	95.336	31.401	0	1	0	0.00978232	276	2.69992	0.223208	14.9996	3.34804	0	290.999	0.217391	0	0
0.000	0.000		-73.301	-169.695	0	73.082	22.361	0	1	0	0.0107998	210	2.26796	0.197997	12.0003	2.37603	0	222	0.285714	0	0
-79.509	27.459		-74.767	-171.193	0	116.079	35.924	0	1	1	0.00980324	336.002	3.29391	0.232358	16.5006	3.83405	0	352.502	0.17857	3.63623	0
-169.695	11.180		-72.897	-165.964	-90	20.402	10.308	0.5	1	0	0.0110771	58.4993	0.648003	0.144002	7.50004	1.08003	1.5	65.9994	1.02565	0	2.27275
0.000	0.000		-78.69	-167.005	0	94.332	26.683	0	1	0	0.00720004	277.5	1.99801	0.155995	18.0003	2.80796	0	295.501	0.216216	0	0
-73.560	63.600		-78.111	-169.695	0	19.416	11.18	0	1	0	0.00757916	56.9985	0.432001	0.197997	5.99991	1.18796	0	62.9984	1.05266	0	0
-170.538	18.248		-74.932	-170.538	0	26.926	12.166	0	1	0	0.00969197	78.0007	0.755981	0.216007	6.00003	1.29605	0	84.0007	0.769224	0	0
0.000	0.000		-85.749	-168.275	0	296.816	54.129	0	3	3	0.00267589	887.998	2.37619	0.173456	32.9994	5.72395	0	920.998	0.202703	5.45464	0
-75.763	69.123		-78.122	-165.75	0	276.93	65	0	1	1	0.00757195	813.001	6.15601	0.14175	47.9999	6.804	0	861.001	0.0738006	1.25	0
-172.875	24.187		-76.535	-171.87	90	36.503	17.678	0.5	1	0	0.00861957	106.499	0.917975	0.252003	7.50005	1.89004	1.5	113.999	0.563386	0	1.3158
0.000	0.000		-77.338	-166.651	0	116.329	30.319	0	1	0	0.00808786	340.5	2.75392	0.151711	21.0003	3.18598	0	361.5	0.176212	0	0
-78.389	74.525		-75.73	0	0	178.508	0	0	1	0	0.0091562	519	4.75208		0	0	0	519	0.115607		0
-174.806	22.091		-76.477	-169.992	0	81.253	17.263	0	1	0	0.00865811	237.001	2.05198	0.203999	9.00019	1.83603	0	246.001	0.253163	0	0
0.000	0.000		-72.35	-174.289	0	23.087	10.05	0	1	0	0.0114544	66.0006	0.756002	0.359974	3.00025	1.08001	0	69.0009	0.909082	0	0
-80.538	33.455		-76.792	0	0	201.326	0	0	1	0	0.00844902	588.001	4.96804		0	0	0	588.001	0.102041		0
-172.235	22.204		-80.586	-169.38	0	391.27	65.115	0	1	1	0.00596879	1158	6.91188	0.191993	36.001	6.91196	0	1194	0.0518134	1.66662	0
0.000	0.000
-77.260	58.951
-172.875	20.156
0.000	0.000
-76.239	75.672
-171.254	19.729
0.000	0.000
-79.399	95.124
-175.601	19.558
0.000	0.000
-87.320	235.257
-174.289	20.100
0.000	0.000
-80.998	102.259
-168.311	29.614
0.000	0.000
-71.372	93.920
-169.695	33.541
0.000	0.000
-83.746	73.437
-169.380	16.279
-90.000	59.000
-73.101	82.565
-171.870	28.284
0.000	0.000
-76.464	55.543
-173.660	18.111
0.000	0.000
-84.472	62.290
-174.289	10.050
0.000	0.000
-84.289	30.150
-168.690	10.198
0.000	0.000
-78.038	120.619
-171.870	35.355
0.000	0.000
-77.471	138.293
-169.380	32.558
0.000	0.000
-76.608	43.174
-168.690	10.198
0.000	0.000
-79.992	69.051
-171.027	19.235
0.000	0.000
-75.033	104.547
-173.660	27.166
0.000	0.000
-76.373	33.956
-172.405	15.133
0.000	0.000
-74.407	44.643
0.000	0.000
0.000	0.000
-78.930	93.744
-172.147	29.275
0.000	0.000
-73.644	95.880
-170.218	29.428
0.000	0.000
-76.329	38.079
-172.405	15.133
0.000	0.000
-81.741	62.650
-167.905	14.318
0.000	0.000
-77.905	100.225
-167.661	32.757
0.000	0.000
-79.574	127.098
0.000	0.000
0.000	0.000
-75.184	80.165
-174.289	25.125
-108.435	1.581
-75.964	12.369
-170.134	11.673
0.000	0.000
-75.417	63.547
-172.093	18.173
0.000	0.500
-62.354	11.853
-171.254	6.576
0.000	0.000
-77.125	17.951
-167.005	6.671
0.000	0.000
-79.540	33.049
-173.991	9.552
0.000	0.000
-73.393	29.741
-171.027	9.618
0.000	0.000
-76.884	52.880
-166.608	10.794
0.000	0.000
-78.212	58.739
-166.675	19.526
0.000	0.000
-77.619	41.976
-169.695	11.180
0.000	0.000
-78.311	29.614
-171.870	14.142
0.000	0.000
-82.235	22.204
-161.565	6.325
0.000	0.000
-77.471	92.195
-167.471	27.659
0.000	0.000
-84.726	65.276
-171.573	27.295
0.000	0.000
-78.690	96.881
-170.538	24.331
0.000	0.000
-74.476	18.682
-170.538	12.166
0.000	0.000
-75.005	115.948
0.000	0.000
0.000	0.000
-74.876	76.655
-168.503	30.104
0.000	0.000
-77.166	173.330
-166.139	39.655
0.000	0.000
-75.903	114.962
0.000	0.000
-90.000	23.000
-78.959	125.320
-172.875	32.249
-90.000	1.000
-76.661	99.690
-168.996	36.674
0.000	0.000
-75.964	90.708
0.000	0.000
0.000	0.000
-78.311	29.614
-169.695	11.180
0.000	0.000
-74.476	56.045
-168.690	25.495
0.000	0.000
-85.030	23.087
-165.964	8.246
0.000	0.000
-75.964	16.492
-170.538	12.166
0.000	0.000
-73.740	100.000
-172.147	29.275
0.000	0.000
-76.430	29.833
180.000	9.000
0.000	0.000
-76.185	62.817
-173.290	17.117
0.000	0.000
-77.471	27.659
180.000	10.000
0.000	0.000
-77.005	53.367
0.000	0.000
0.000	0.000
-75.483	57.847
-171.416	26.800
0.000	0.000
-75.964	296.864
-169.426	76.295
180.000	1.000
-79.788	276.378
-171.416	53.600
0.000	0.000
-77.619	41.976
-167.905	14.318
0.000	0.000
-75.512	153.894
-171.573	40.942
0.000	0.000
-77.391	38.939
-169.695	11.180
0.000	0.000
-85.339	92.305
-168.690	17.847
0.000	0.000
-81.808	393.010
-172.057	86.833
0.000	0.000
-79.611	122.000
-167.989	48.052
0.000	0.000
-79.287	75.313
-162.474	19.925
0.000	0.000
-79.695	33.541
-167.471	18.439
0.000	0.000
-77.320	123.000
-170.538	30.414
0.000	0.000
-82.288	96.876
-170.538	18.248
0.000	0.000
-75.292	82.710
0.000	0.000
0.000	0.000
-74.876	76.655
-177.274	21.024
45.000	1.414
-76.441	174.874
-169.461	43.738
0.000	0.000
-81.327	59.682
-169.992	34.525
0.000	0.000
-68.199	16.155
-172.875	8.062
0.000	0.000
-75.411	226.296
-166.504	51.420
0.000	0.000
-82.799	374.957
-167.471	36.878
0.000	0.000
-76.458	337.380
-168.147	82.765
0.000	0.000
-77.320	41.000
-164.745	11.402
0.000	0.000
-73.009	37.643
-165.069	15.524
0.000	0.000
-75.964	127.816
-169.046	31.575
0.000	0.000
-78.559	85.703
-172.235	22.204
0.000	0.000
-72.672	130.943
-169.461	43.738
0.000	2.000
-72.499	116.387
-168.690	35.693
0.000	0.000
-78.690	35.693
-172.875	8.062
0.000	0.000
-75.888	184.570
-169.066	44.814
0.000	0.000
-82.648	31.257
-167.905	14.318
-90.000	1.000
-75.964	49.477
-171.469	20.224
0.000	0.000
-76.707	187.011
-164.219	47.802
0.000	0.000
-82.142	387.640
-168.996	73.348
0.000	0.000
-75.150	273.123
-165.069	62.097
0.000	0.000
-79.330	140.428
-171.384	33.377
0.000	0.000
-76.171	133.881
-170.789	37.483
0.000	0.000
-85.601	19.558
-173.660	4.528
0.000	0.000
-78.214	129.735
-161.565	34.785
0.000	0.000
-78.408	59.718
-166.504	12.855
-135.000	0.707
-80.446	51.210
-173.884	14.080
0.000	0.000
-77.005	26.683
180.000	13.000
0.000	0.000
-76.608	64.761
-171.870	21.213
0.000	0.000
-83.991	229.260
-166.293	42.202
0.000	0.000
-72.759	60.729
-174.289	20.100
0.000	0.000
-75.964	12.369
-173.660	4.528
0.000	0.000
-80.074	20.304
180.000	5.000
0.000	0.000
-76.551	47.297
-171.870	21.213
90.000	0.500
-74.745	57.009
-171.254	19.729
0.000	0.000
-81.634	68.731
-178.091	15.008
0.000	0.000
-80.754	43.566
-167.905	14.318
0.000	0.000
-77.932	148.277
-168.111	38.833
0.000	0.000
-81.254	78.918
-167.471	18.439
0.000	0.000
-79.695	89.443
-171.027	19.235
0.000	0.000
-75.964	109.262
-169.611	30.500
0.000	0.000
-80.538	18.248
-171.254	6.576
0.000	0.000
-81.754	34.860
-172.405	7.566
-90.000	0.500
-78.366	17.357
-169.992	8.631
0.000	0.000
-72.474	109.587
0.000	0.000
0.000	0.000
-73.989	59.821
-170.838	15.700
0.000	0.000
-75.055	137.656
-168.179	43.932
0.000	1.000
-82.461	274.372
-164.055	72.801
0.000	0.000
-78.321	182.784
-170.961	44.553
0.000	0.000
-79.875	85.329
-171.870	21.213
0.000	0.000
-84.644	64.281
-175.236	12.042
0.000	0.000
-79.315	53.935
-174.560	21.095
0.000	0.000
-77.905	14.318
180.000	8.000
0.000	0.000
-71.565	15.811
-175.601	13.038
0.000	0.000
-79.232	165.922
-168.111	38.833
0.000	0.000
-78.579	101.000
-171.254	26.306
0.000	0.000
-75.579	18.069
-176.820	9.014
0.000	0.000
-76.083	58.209
-168.111	19.416
0.000	0.000
-77.257	145.073
0.000	0.000
-90.000	17.000
-80.081	185.777
-172.875	48.374
0.000	2.000
-78.425	84.723
-174.289	30.150
0.000	0.000
-80.166	76.118
0.000	0.000
0.000	0.000
-73.788	236.400
-169.902	74.148
0.000	0.000
-71.365	90.758
-172.093	36.346
0.000	1.000
-77.932	148.277
-167.276	31.780
0.000	0.000
-77.196	45.122
-168.111	19.416
0.000	0.000
-77.300	36.390
-169.216	10.689
0.000	0.000
-77.110	103.098
-168.486	27.554
0.000	0.000
-81.511	67.742
-174.174	16.418
0.000	0.000
-75.124	33.110
-173.884	14.080
0.000	0.000
-78.774	66.778
-171.384	16.688
0.000	0.000
-74.085	129.462
0.000	0.000
0.000	0.000
-75.046	166.643
0.000	0.000
0.000	0.000
-79.919	137.117
-170.538	36.497
0.000	0.000
-78.398	154.149
-165.324	43.417
0.000	0.000
-86.090	395.922
-168.690	91.782
0.000	0.000
-73.393	59.481
-167.196	22.561
0.000	0.000
-76.938	128.320
-165.964	37.108
0.000	0.000
-77.005	80.050
-168.111	19.416
0.000	0.000
-79.857	221.461
-170.049	57.871
0.000	0.000
-72.160	91.395
-171.634	34.366
0.000	0.000
-75.483	115.694
-172.235	44.407
45.000	1.414
-76.149	75.186
-169.695	22.361
0.000	0.000
-81.870	56.569
0.000	0.000
0.000	0.000
-75.793	162.985
-169.509	54.918
0.000	0.000
-75.155	85.866
0.000	0.000
0.000	0.000
-78.756	169.248
-174.806	33.136
0.000	0.000
-84.289	20.100
-167.471	9.220
0.000	0.000
-80.895	78.995
-174.289	25.125
0.000	0.000
-77.821	71.100
-173.367	21.645
0.000	0.000
-76.588	66.823
-174.644	16.070
0.000	0.000
-71.775	43.165
-170.538	15.207
0.000	0.000
-75.548	50.085
-172.405	15.133
0.000	0.000
-75.315	149.897
-171.027	38.471
0.000	0.000
-74.798	95.336
-170.838	31.401
0.000	0.000
-73.301	73.082
-169.695	22.361
0.000	0.000
-74.767	116.079
-171.193	35.924
0.000	0.000
-72.897	20.402
-165.964	10.308
-90.000	0.500
-78.690	94.332
-167.005	26.683
0.000	0.000
-78.111	19.416
-169.695	11.180
0.000	0.000
-74.932	26.926
-170.538	12.166
0.000	0.000
-85.749	296.816
-168.275	54.129
0.000	0.000
-78.122	276.930
-165.750	65.000
0.000	0.000
-76.535	36.503
-171.870	17.678
180.000	0.500
-77.338	116.329
-166.651	30.319
0.000	0.000
-75.730	178.508
0.000	0.000
0.000	0.000
-76.477	81.253
-169.992	17.263
0.000	0.000
-72.350	23.087
-174.289	10.050
0.000	0.000
-76.792	201.326
0.000	0.000
0.000	0.000
-80.586	391.270
-169.380	65.115
0.000	0.000

## Sheet: 210310_12uM_CTRL_3s_004
											3.14159	s	µm	µm/s	s	µm	s	s	Event/min	Event/min	%			Growth rate			Shrink rate			Catastrophe			Rescue
angle raw	length raw		angle pol	angle depol	angle pause	length pol	length depol	length pause	N of Cata	N of rescue	G rate	G duration	G distance	S rate	S duration	S distance	Pause dur.	Time G+S	Freq Cata	Freq Rescue	% in pause			mean	SD	N	mean	SD	N	mean	SD	N	mean	SD	N
-74.995	100.424		-74.995	-174.144	0	100.424	39.205	0	1	0	0.00964953	291	2.80801	0.351	12.0001	4.21204	0	303	0.206186	0	0		second	0.00819476	0.00245336	153	0.320918	0.16078	153	0.00343415	0.00277017	153	0.114868	0.110566	153
-174.144	39.205		-77.989	-172.405	0	48.052	15.133	0	1	0	0.00765925	141	1.07996	0.269987	6.00038	1.62003	0	147	0.425532	0	0		minute	0.491686	0.147201	153	19.2551	9.64683	153	0.206049	0.16621	153	6.89208	6.63396	153
0.000	0.000		-82.569	-170.538	0	23.195	6.083	0	1	0	0.00469539	69.0006	0.323985	0.216007	3.00002	0.648026	0	72.0006	0.869558	0	0
-77.989	48.052		-74.476	-172.875	0	18.682	8.062	0	1	0	0.00999991	54.0014	0.540009	0.288	2.9999	0.863972	0	57.0013	1.11108	0	0			Growth duration			Shrink duration
-172.405	15.133		-78.69	-170.538	0	15.297	6.083	0	1	0	0.00720004	44.9998	0.324001	0.216007	3.00002	0.648026	0	47.9998	1.33334	0	0			mean	SD	N	mean	SD	N		TOTAL G+S	G dur	S dur.
0.000	0.000		-83.047	-172.875	0	20.652	8.062	0	1	0	0.00439027	61.5004	0.270003	0.288	2.9999	0.863972	0	64.5003	0.975604	0	0		sec	291.193	234.892	153	8.70564	8.3796	153	sec	45884.5	44552.5	1331.96
-82.569	23.195		-80.134	-175.236	0	23.345	6.021	0	1	0	0.00626099	68.9993	0.432004	0.431967	1.50016	0.648021	0	70.4994	0.869574	0	0		min	4.85322	3.91486	153	0.145094	0.13966	153	min	764.741	742.542	22.1994
-170.538	6.083		-75.42	-174.898	0	89.378	28.111	0	1	0	0.00936387	259.499	2.42992	0.403213	7.49965	3.02396	0	266.999	0.231214	0	0
0.000	0.000		-74.851	-173.746	0	118.622	36.719	0	1	0	0.00974657	343.499	3.34795	0.328501	12.0001	3.94205	0	355.5	0.174673	0	0			G	C	S	R				TOTAL L G+S	G length	S length
-74.476	18.682		-77.619	-173.66	0	167.905	36.222	0	1	0	0.00790259	492	3.88808	0.32401	11.9998	3.88805	0	504	0.121951	0	0			0.00819476	0.00343415	0.320918	0.114868			µm	739.331	368.388	370.943
-172.875	8.062		-66.371	-175.236	0	34.928	12.042	0	1	0	0.0157497	95.9989	1.51196	0.431967	3.00033	1.29604	0	98.9992	0.625007	0	0			mean	SD	N
0.000	0.000		-71.021	-172.278	0	199.865	59.54	0	1	0	0.012381	567	7.02004	0.265494	24.0006	6.37201	0	591	0.10582	0	0		AVG Cata	0.360846	0.336795	153
-78.690	15.297		-77.32	-173.66	0	41	9.055	0	1	0	0.00809974	120	0.971971	0.32401	2.99978	0.971959	0	123	0.499999	0	0		AVG Rescue	0.18188	0.911656	153
-170.538	6.083		-78.056	0	0	53.151	0	0	0	0	0.00761526	156.001	1.18799		0	0	0	156.001	0		0		AVG %pause	1.36135	16.3432	153			<L>	J
0.000	0.000		-72.699	-174.806	0	63.891	22.091	0	1	0	0.0112134	183.001	2.05207	0.396032	5.99958	2.37603	0	189	0.327867	0	0								16.3584	-0.00135893
-83.047	20.652		-72.864	-173.047	0	125.575	41.304	0	1	0	0.0110998	360.001	3.99595	0.295198	15.0002	4.42803	0	375.002	0.166666	0	0		Total pause duration		1.8		EVENTs
-172.875	8.062		-78.275	0	0	54.129	0	0	0	0	0.00747162	158.999	1.18798		0	0	0	158.999	0		0		number of pause		8		Cat/min	Rescue/min	Pause/min		Cat/µm	Rescue/µm	Pause/µm
0.000	0.000		-71.25	-172.461	90	115.109	34.297	0.5	1	0	0.0122203	327.001	3.99606	0.272016	13.4994	3.67206	1.5	340.5	0.183486	0	0.440529						0.184501	0.495509	0.0104611		0.371891	0.0296541	0.0108206
-80.134	23.345		-74.957	-175.426	-90	82.839	25.08	0.5	1	0	0.00967512	240.001	2.32204	0.449992	6.00013	2.70001	1.5	246.001	0.249999	0	0.609754
-175.236	6.021		-70.949	-174.508	0	73.527	26.12	0	1	0	0.0124316	208.499	2.59199	0.374422	7.49958	2.80801	0	215.999	0.287771	0	0		pause dur./GS duration		0.00235374	min/min
0.000	0.000		-74.507	0	0	147.873	0	0	0	0	0.00997894	427.499	4.26599		0	0	0	427.499	0		0		N pause / GS duration		0.0104611	event/min	0.0104611	by count	0.0104611	by count			0.0108206	by count
-75.420	89.378		-84.56	-173.66	0	42.19	9.055	0	1	0	0.00342836	126	0.431973	0.32401	2.99978	0.971959	0	129	0.476191	0	0
-174.898	28.111		-76.255	-171.027	0	143.098	38.471	0	1	0	0.00880581	417	3.67203	0.22799	18.0009	4.10402	0	435.001	0.143885	0	0		Counting
0.000	0.000		-75.203	-172.648	90	109.636	31.257	1	1	0	0.00950958	318	3.02405	0.279014	11.9994	3.348	3	330	0.188679	0	0.909092		Catastrophe	Rescue	Pause	N of kymos	Frames ?
-74.851	118.622		-77.471	-169.695	0	18.439	11.18	0	1	0	0.00800012	53.9997	0.432004	0.197997	5.99991	1.18796	0	59.9996	1.11112	0	0		137	11	8		401
-173.746	36.719		-74.578	-176.987	0	60.166	19.026	0	1	0	0.00993092	173.999	1.72797	0.683951	3.00016	2.05197	0	176.999	0.34483	0	0
0.000	0.000		-77.005	-174.806	0	13.342	11.045	0	1	0	0.00830794	39.0009	0.324018	0.396032	2.99965	1.18796	0	42.0006	1.53843	0	0
-77.619	167.905		-79.046	-176.906	0	189.452	37.054	0	1	0	0.00696769	558.001	3.88798	0.666012	5.99989	3.996	0	564	0.107527	0	0
-173.660	36.222		-81.444	-174.289	0	114.272	20.1	0	1	0	0.00541621	339.001	1.8361	0.359974	6.0005	2.16003	0	345.001	0.176991	0	0
0.000	0.000		-74.745	-174.596	0	108.317	37.165	0	1	0	0.00981809	313.501	3.07799	0.380556	10.5004	3.99598	0	324.002	0.191387	0	0
-66.371	34.928		-83.517	-168.69	0	22.142	10.198	0	1	0	0.00409086	66.0012	0.270002	0.179999	6.00001	1.08	0	72.0012	0.909074	0	0
-175.236	12.042		-80.652	-170.134	0	123.135	23.345	0	1	0	0.00592619	364.499	2.1601	0.206996	12.0001	2.48397	0	376.499	0.164609	0	0
0.000	0.000		-85.406	-171.254	0	112.361	13.153	0	1	0	0.00289269	336	0.971946	0.234004	5.99991	1.40401	0	342	0.178571	0	0
-71.021	199.865		-78.232	-165.964	0	24.515	8.246	0	1	0	0.0074998	71.9992	0.53998	0.144002	5.99974	0.863979	0	77.9989	0.833343	0	0
-172.278	59.540		-72.429	-172.405	0	125.873	45.398	0	1	0	0.0113998	360.001	4.10394	0.269987	18.0007	4.85997	0	378.001	0.166666	0	0
0.000	0.000		-80.064	-174.289	0	139.086	30.15	0	1	0	0.00630631	411	2.59189	0.359974	9.00075	3.24004	0	420	0.145986	0	0
-77.320	41.000		-84.508	-174.289	0	52.24	10.05	0	1	0	0.00346133	156.001	0.53997	0.359974	3.00025	1.08001	0	159.001	0.384614	0	0
-173.660	9.055		-77.661	0	0	65.513	0	0	0	0	0.00787493	191.999	1.51198		0	0	0	191.999	0		0
0.000	0.000		-69.775	-168.69	0	40.497	15.297	0	1	0	0.0132632	114	1.51201	0.179999	9.00002	1.61999	0	123	0.526315	0	0
-78.056	53.151		-77.005	-172.093	0	120.075	36.346	0	1	0	0.00830794	351	2.91609	0.259205	14.9999	3.88805	0	365.999	0.17094	0	0
0.000	0.000		-74.982	0	0	42.45	0	0	0	0	0.00965828	123	1.18797		0	0	0	123	0		0
0.000	0.000		-76.608	-170.538	0	21.587	6.083	0	1	0	0.00857109	63	0.539979	0.216007	3.00002	0.648026	0	66	0.95238	0	0
-72.699	63.891		-72.121	-175.236	0	65.146	24.083	0	1	0	0.0116131	186	2.16004	0.431967	6.0004	2.59198	0	192	0.322581	0	0
-174.806	22.091		-80.311	-169.38	0	83.187	16.279	0	1	0	0.00614647	246.001	1.51204	0.191993	9.00039	1.72802	0	255.002	0.243901	0	0
0.000	0.000		-82.093	-177.333	0	72.691	14	0	1	0	0.00499989	216	1.07998	0.772837	1.95431	1.51036	0	217.954	0.277778	0	0
-72.864	125.575		-71.075	-175.914	0	37	14.036	0	1	0	0.0123431	105	1.29602	0.503952	3.00035	1.51203	0	108	0.57143	0	0
-173.047	41.304		-78.44	-171.254	0	44.911	13.153	0	1	1	0.00736354	132	0.971989	0.234004	5.99991	1.40401	0	138	0.454545	10.0001	0
0.000	0.000		-77.005	-175.914	0	40.025	14.036	0	1	0	0.00830794	117	0.972028	0.503952	3.00035	1.51203	0	120	0.512821	0	0
-78.275	54.129		-73.35	-173.29	0	111.683	34.234	0	1	0	0.0107663	321.001	3.45599	0.305992	12.0001	3.67195	0	333.001	0.186915	0	0
0.000	0.000		-77.574	-173.991	0	60.415	19.105	0	1	0	0.00793223	176.999	1.404	0.342	6	2.052	0	182.999	0.338984	0	0
0.000	0.000		-77.367	-169.695	0	59.439	22.361	0	1	0	0.00806872	174	1.40396	0.197997	12.0003	2.37603	0	186	0.344827	0	0
-71.250	115.109		-84.806	-171.254	0	16.568	6.576	0	1	0	0.00327245	49.4999	0.161986	0.234004	2.99973	0.70195	0	52.4996	1.21212	0	0
-172.461	34.297		-77.074	-169.38	0	31.293	8.139	0	1	0	0.00826229	91.5001	0.756001	0.191993	4.49992	0.863955	0	96	0.655737	0	0
180.000	0.500		-75.174	-173.48	0	52.757	17.614	0.5	1	0	0.00952908	153.002	1.45797	0.31499	6.00021	1.89001	0	159.002	0.392152	0	0
-74.957	82.839		-83.66	-177.274	90	15.092	7.008	31	1	0	0.00399987	44.9991	0.179991	0.756086	0.999896	0.756008	93	45.999	1.33336	0	202.178
-175.426	25.080		-75.816	-170.91	0	31.287	8.439	0	1	0	0.0090987	90.9995	0.827978	0.225007	3.99972	0.899966	0	94.9993	0.659344	0	0
-90.000	0.500		-72.626	-176.634	0	56.931	17.029	0	1	0	0.0112638	163.001	1.836	0.612083	2.99952	1.83596	0	166	0.368097	0	0
-70.949	73.527		-79.034	-169.54	0	98.125	22.033	0	1	0	0.00697552	289	2.01592	0.194998	12.0002	2.34002	0	301	0.207613	0	0
-174.508	26.120		-79.38	-173.66	0	16.279	6.037	0	1	0	0.00675022	48.0005	0.324014	0.32401	1.99997	0.648008	0	50.0004	1.24999	0	0
0.000	0.000		-75.812	-169.796	0	61.2	16.935	0	1	0	0.00910137	178	1.62004	0.199999	9.00028	1.80005	0	187	0.337079	0	0
-74.507	147.873		-74.261	-174.472	0	114.285	31.145	0	1	0	0.0101456	330	3.34805	0.371968	9.0008	3.34802	0	339.001	0.181818	0	0
0.000	0.000		-75.619	-173.29	0	40.262	17.117	0	1	0	0.0092305	117.001	1.07998	0.305992	6.00006	1.83597	0	123.001	0.512815	0	0
0.000	0.000		-79.216	-170.538	0	21.378	12.166	0	1	0	0.00685694	63.0014	0.431997	0.216007	6.00003	1.29605	0	69.0014	0.95236	0	0
-84.560	42.190		-83.418	-173.66	0	26.173	9.055	0	1	0	0.00415388	78.0015	0.324009	0.32401	2.99978	0.971959	0	81.0012	0.769216	0	0
-173.660	9.055		-73.009	-171.87	0	37.643	14.142	0	1	0	0.0110001	108	1.18801	0.252003	5.99987	1.51199	0	114	0.555557	0	0
0.000	0.000		-74.505	-170.538	0	104.809	30.414	0	1	0	0.00998029	302.999	3.02402	0.216007	14.9996	3.24002	0	317.998	0.198021	0	0
-76.255	143.098		-81.573	-171.254	0	27.295	13.153	0	1	0	0.00533335	81.0009	0.432007	0.234004	5.99991	1.40401	0	87.0008	0.740732	0	0
-171.027	38.471		-73.909	-174.094	0	108.24	29.155	0	1	0	0.0103847	311.998	3.24002	0.348008	8.99986	3.13203	0	320.998	0.192309	0	0
0.000	0.000		-77.648	-174.644	0	140.246	32.14	0	1	0	0.00788349	410.999	3.24011	0.383987	9.0002	3.45596	0	419.999	0.145986	0	0
-75.203	109.636		-74.141	-176.309	0	91.482	31.064	0	1	0	0.010227	264	2.69993	0.558058	5.99929	3.34795	0	269.999	0.227273	0	0
-172.648	31.257		-79.046	-174.56	0	94.726	21.095	0	1	0	0.00696769	279	1.94399	0.378023	5.99963	2.268	0	285	0.215054	0	0
180.000	1.000		-74.932	-175.03	0	80.777	23.087	0	1	0	0.00969197	233.999	2.26791	0.413978	6.00037	2.48402	0	240	0.256411	0	0
-77.471	18.439		-73.639	0	0	113.6	0	0	0	0	0.0105687	327	3.45598		0	0	0	327	0		0
-169.695	11.180		-77.361	0	0	169.098	0	0	0	0	0.00807268	495.001	3.99599		0	0	0	495.001	0		0
0.000	0.000		-74.518	-172.528	0	221.02	61.522	0	1	0	0.0099715	639	6.3718	0.274483	24.0013	6.58796	0	663.002	0.0938966	0	0
-74.578	60.166		-77.32	-171.87	0	41	14.142	0	1	0	0.00809974	120	0.971971	0.252003	5.99987	1.51199	0	126	0.499999	0	0
-176.987	19.026		-79.509	-174.806	0	27.459	11.045	0	1	0	0.00666635	80.9999	0.539975	0.396032	2.99965	1.18796	0	83.9996	0.740741	0	0
0.000	0.000		-77.33	-174.472	0	66.11	15.572	0	1	0	0.00809314	193.501	1.56603	0.371968	4.50025	1.67395	0	198.001	0.310077	0	0
-77.005	13.342		-75.864	-172.875	0	69.608	20.156	0	1	0	0.00906662	202.501	1.836	0.288	7.50012	2.16004	0	210.001	0.296295	0	0
-174.806	11.045		-71.792	-172.451	90	120.009	41.863	0.5	1	0	0.0118418	342	4.04988	0.271651	16.4991	4.48202	1.5	358.499	0.175439	0	0.418411
0.000	0.000		-75.303	0	0	126.127	0	0	1	1	0.0094424	366.001	3.45593		0	0	0	366.001	0.163934		0
-79.046	189.452		-72.646	-172.875	0	33.526	24.187	0	1	0	0.01125	95.9997	1.07999	0.288	9.00006	2.59202	0	105	0.625002	0	0
-176.906	37.054		-74.784	-172.093	-90	129.541	36.346	1	1	0	0.00979177	374.999	3.67191	0.259205	14.9999	3.88805	3	389.999	0.16	0	0.769233
0.000	0.000		-79.695	-173.66	0	33.541	9.055	0	1	0	0.00654555	98.9999	0.648009	0.32401	2.99978	0.971959	0	102	0.606061	0	0
-81.444	114.272		-77.125	0	0	179.513	0	0	0	0	0.00822856	524.999	4.31999		0	0	0	524.999	0		0
-174.289	20.100		-75.489	-171.573	0	87.801	27.295	0	1	0	0.0093176	255	2.37599	0.242999	12.0002	2.91603	0	267.001	0.235294	0	0
0.000	0.000		-82.85	-173.29	0	281.187	68.469	0	1	1	0.00451594	837.001	3.77985	0.305992	24.0006	7.344	0	861.002	0.0716845	2.49994	0
-74.745	108.317		-79.046	-175.236	0	31.575	12.042	0	1	0	0.00696769	92.9991	0.64799	0.431967	3.00033	1.29604	0	95.9994	0.645167	0	0
-174.596	37.165		-81.634	-170.538	0	34.366	12.166	0	1	0	0.00529419	102.001	0.540012	0.216007	6.00003	1.29605	0	108.001	0.58823	0	0
0.000	0.000		-71.338	0	0	159.38	0	0	0	0	0.0121587	453.001	5.50791		0	0	0	453.001	0		0
-83.517	22.142		-74.89	-174.289	0	103.581	30.15	0	1	0	0.00972028	300	2.91608	0.359974	9.00075	3.24004	0	309	0.2	0	0
-168.690	10.198		-81.634	-177.274	0	51.549	10.512	0	1	0	0.00529419	153.001	0.810018	0.756086	1.49984	1.13401	0	154.501	0.392153	0	0
0.000	0.000		-79.439	-167.905	0	30.008	7.159	0	1	0	0.00671185	88.499	0.593993	0.167996	4.50015	0.756009	0	92.9992	0.677974	0	0
-80.652	123.135		-80.218	-176.987	90	29.428	9.513	0.5	1	0	0.00620663	87.0005	0.53998	0.683951	1.50008	1.02598	1.5	88.5005	0.689651	0	1.6949
-170.134	23.345		-76.891	0	0	37.477	0	0	0	0	0.00838342	109.501	0.917994		0	0	0	109.501	0		0
0.000	0.000		-73.009	-171.764	0	112.929	38.396	0	1	0	0.0110001	323.999	3.56403	0.248715	16.5008	4.104	0	340.5	0.185186	0	0
-85.406	112.361		-68.35	-169.695	0	70.472	27.951	0	1	0	0.0142897	196.502	2.80796	0.197997	15.0003	2.97001	0	211.502	0.305341	0	0
-171.254	13.153		-75.256	-171.469	0	19.647	10.112	0	1	0	0.00947397	57.0002	0.540019	0.239993	4.50018	1.08001	0	61.5004	1.05263	0	0
0.000	0.000		-70.897	-171.983	0	108.473	35.85	0	1	0	0.0124682	307.499	3.83396	0.255603	14.9997	3.83396	0	322.498	0.195123	0	0
-78.232	24.515		-80.074	-175.601	0	20.304	6.519	0	1	0	0.00629983	60.0002	0.377992	0.467968	1.50005	0.701978	0	61.5003	0.999996	0	0
-165.964	8.246		-71.565	-172.694	0	61.664	19.66	0	1	0	0.012	175.499	2.10599	0.28079	7.5004	2.10604	0	182.999	0.341883	0	0
0.000	0.000		-81.634	-169.695	0	17.183	5.59	0	1	0	0.00529419	51.0005	0.270006	0.197997	2.99995	0.593982	0	54.0004	1.17646	0	0
-72.429	125.873		-80.248	-169.992	0	32.469	8.631	0	1	0	0.00618722	95.9995	0.59397	0.203999	4.49983	0.917964	0	100.499	0.625003	0	0
-172.405	45.398		-75.53	-172.405	0	48.023	15.133	0	1	0	0.00929012	139.499	1.29596	0.269987	6.00038	1.62003	0	145.499	0.430111	0	0
0.000	0.000		-72.296	0	0	185.799	0	0	0	0	0.0114918	530.999	6.10215		0	0	0	530.999	0		0
-80.064	139.086		-79.439	-175.236	0	60.017	12.042	0	1	0	0.00671185	177.001	1.18801	0.431967	3.00033	1.29604	0	180.001	0.338981	0	0
-174.289	30.150		-70.665	0	0	302.035	0	0	0	0	0.0126317	855	10.8001		0	0	0	855	0		0
0.000	0.000		-81.703	-171.254	0	48.508	13.153	0	1	0	0.0052499	144.001	0.755991	0.234004	5.99991	1.40401	0	150.001	0.416664	0	0
-84.508	52.240		-72.239	-173.83	0	134.406	37.216	0	1	0	0.0115313	384	4.42802	0.333009	11.9998	3.99605	0	395.999	0.15625	0	0
-174.289	10.050		-73.261	-172.057	0	138.885	43.417	0	1	0	0.0108272	399	4.32007	0.258015	17.9991	4.64405	0	416.999	0.150376	0	0
0.000	0.000		-72.423	-169.38	0	168.885	48.836	0	1	0	0.011404	483	5.50812	0.191993	27.0006	5.18395	0	510.001	0.124224	0	0
-77.661	65.513		-82.071	-171.119	0	362.465	64.777	0	1	1	0.00501398	1077	5.40006	0.230391	30.0014	6.91204	0	1107	0.0557103	1.99991	0
0.000	0.000		-74.441	0	0	264.7	0	0	0	0	0.0100236	765	7.66807		0	0	0	765	0		0
0.000	0.000		-80.513	-171.87	0	388.31	63.64	0	1	1	0.00601593	1149	6.9123	0.252003	26.9998	6.80404	0	1176	0.0522194	2.22224	0
-69.775	40.497		-82.6	-173.66	90	77.647	18.111	1	1	0	0.00467558	231.001	1.08006	0.32401	5.9999	1.94403	3	237.001	0.259739	0	1.26582
-168.690	15.297		-80.44	-170.538	0	192.676	36.497	0	1	0	0.00606309	570	3.45597	0.216007	17.9996	3.88805	0	588	0.105263	0	0
0.000	0.000		-76.43	-176.987	0	59.666	19.026	0	1	0	0.00868936	174.001	1.51196	0.683951	3.00016	2.05197	0	177.001	0.344825	0	0
-77.005	120.075		-76.171	-169.695	0	133.881	33.541	0	1	0	0.00886176	390.001	3.4561	0.197997	18.0003	3.564	0	408.001	0.153846	0	0
-172.093	36.346		-78.871	-172.405	0	62.169	15.133	0	1	0	0.00708184	183	1.29598	0.269987	6.00038	1.62003	0	189	0.327869	0	0
0.000	0.000		-81.87	-173.29	0	77.782	17.117	0	1	0	0.00514279	231.001	1.18799	0.305992	6.00006	1.83597	0	237.001	0.259739	0	0
-74.982	42.450		-76.569	-173.83	0	137.768	37.216	0	1	0	0.00859699	402	3.45599	0.333009	11.9998	3.99605	0	414	0.149254	0	0
0.000	0.000		-81.798	-171.674	0	336.442	82.873	0	1	1	0.00518896	999.002	5.18378	0.245989	36.0013	8.85595	0	1035	0.0600599	1.66661	0
0.000	0.000		-77.619	-171.254	0	41.976	13.153	0	1	0	0.00790259	122.999	0.972015	0.234004	5.99991	1.40401	0	128.999	0.487807	0	0
-76.608	21.587		-82.011	-172.875	0	57.559	16.125	0	1	0	0.00505242	171.001	0.86397	0.288	6.00017	1.72805	0	177.001	0.350875	0	0
-170.538	6.083		-75.256	-172.875	0	157.175	48.374	0	1	0	0.00947397	455.999	4.32012	0.288	18.0001	5.18405	0	473.999	0.131579	0	0
0.000	0.000		-75.466	-173.66	0	111.571	49.805	0	1	0	0.00933302	324.002	3.02392	0.32401	16.4996	5.34604	0	340.501	0.185184	0	0
-72.121	65.146		-77.53	-174.094	0	213.026	58.31	0	1	0	0.00796123	624.002	4.96782	0.348008	17.9997	6.26405	0	642.001	0.0961536	0	0
-175.236	24.083		-79.824	-175.914	0	39.623	14.036	0	1	0	0.00646185	116.999	0.756032	0.503952	3.00035	1.51203	0	120	0.512824	0	0
0.000	0.000		-80.538	-174.806	0	42.579	11.045	0	1	0	0.00599979	125.999	0.755968	0.396032	2.99965	1.18796	0	128.999	0.476194	0	0
-80.311	83.187		-73.695	-168.906	0	153.16	51.971	0	1	0	0.0105305	441	4.64397	0.183595	30.0007	5.50798	0	471.001	0.136054	0	0
-169.380	16.279		-79.796	0	0	152.411	0	0	0	0	0.00648001	450.001	2.91601		0	0	0	450.001	0		0
0.000	0.000		-82.405	-168.69	0	15.133	10.198	0	1	0	0.00480022	45.0007	0.216014	0.179999	6.00001	1.08	0	51.0007	1.33331	0	0
-82.093	72.691		-78.69	-172.235	0	91.782	22.204	0	1	0	0.00720004	269.999	1.944	0.264005	8.99997	2.37604	0	278.999	0.222223	0	0
180.000	14.000		-73.88	-172.011	0	180.081	57.559	0	1	0	0.0104045	519.002	5.39995	0.25651	23.9992	6.15604	0	543.001	0.115607	0	0
0.000	0.000		-77.471	0	0	73.756	0	0	0	0	0.00800012	215.999	1.72802		0	0	0	215.999	0		0
-71.075	37.000		-81.584	-170.417	0	396.268	78.09	0	1	1	0.00532628	1176	6.26373	0.213229	39.0004	8.31603	0	1215	0.0510203	1.53845	0
-175.914	14.036		-82.704	-170.538	0	291.359	54.745	0	1	1	0.00460915	867	3.99613	0.216007	26.9992	5.83202	0	893.999	0.0692042	2.22229	0
0.000	0.000		-79.077	-172.875	0	58.052	24.187	0	1	0	0.00694749	171.001	1.18803	0.288	9.00006	2.59202	0	180.001	0.350876	0	0
-78.440	44.911		-74.476	0	0	224.179	0	0	1	1	0.00999991	648.002	6.47997		0	0	0	648.002	0.0925923		0
-171.254	13.153		-81.298	-174.289	0	49.571	10.05	0	1	0	0.00551005	147.001	0.809985	0.359974	3.00025	1.08001	0	150.001	0.40816	0	0
0.000	0.000		-77.471	-172.185	0	184.391	51.478	0	1	0	0.00800012	540	4.32007	0.262295	20.9992	5.50799	0	560.999	0.111111	0	0
-77.005	40.025		-78.871	-173.418	0	62.169	26.173	0	1	0	0.00708184	183	1.29598	0.311997	9.00025	2.80805	0	192	0.327869	0	0
-175.914	14.036		-78.879	-175.601	0	119.239	39.115	0	1	0	0.00707662	351	2.48389	0.467968	9.00055	4.21198	0	360	0.17094	0	0
0.000	0.000		-78.346	0	0	163.368	0	0	0	0	0.0074251	480.001	3.56405		0	0	0	480.001	0		0
-73.350	111.683		-76.31	-174.289	0	80.281	30.15	0	1	0	0.00876919	234.001	2.052	0.359974	9.00075	3.24004	0	243.002	0.256409	0	0
-173.290	34.234		-78.97	-171.573	0	120.221	27.295	0	1	0	0.00701725	354.001	2.48411	0.242999	12.0002	2.91603	0	366.001	0.169491	0	0
0.000	0.000		-81.396	0	0	153.73	0	0	1	1	0.00544705	456	2.48386		0	0	0	456	0.131579		0
-77.574	60.415		-78.69	-175.601	0	193.763	39.115	0	1	0	0.00720004	570.001	4.10403	0.467968	9.00055	4.21198	0	579.001	0.105263	0	0
-173.991	19.105		-77.905	-170.538	0	28.636	12.166	0	1	0	0.00771444	84.001	0.648021	0.216007	6.00003	1.29605	0	90.001	0.714277	0	0
0.000	0.000		-78.69	-175.914	0	45.891	14.036	0	1	0	0.00720004	134.999	0.972002	0.503952	3.00035	1.51203	0	138	0.444446	0	0
-77.367	59.439		-81.132	-170.538	0	285.412	54.745	0	1	1	0.00561685	846.001	4.75186	0.216007	26.9992	5.83202	0	873	0.0709219	2.22229	0
-169.695	22.361		-76.773	-169.902	0	240.377	74.148	0	1	0	0.00846162	702	5.94006	0.202144	39.0016	7.88393	0	741.002	0.0854701	0	0
0.000	0.000		-75.681	-171.973	0	295.169	78.772	0	1	0	0.00918899	857.998	7.88414	0.25528	32.9991	8.42402	0	890.997	0.0699303	0	0
-84.806	16.568
-171.254	6.576
0.000	0.000
-77.074	31.293
-169.380	8.139
0.000	0.000
-75.174	52.757
-173.480	17.614
0.000	0.500
-83.660	15.092
-177.274	7.008
-172.648	31.257
-75.816	31.287
-170.910	8.439
0.000	0.000
-72.626	56.931
-176.634	17.029
0.000	0.000
-79.034	98.125
-169.540	22.033
0.000	0.000
-79.380	16.279
-173.660	6.037
0.000	0.000
-75.812	61.200
-169.796	16.935
0.000	0.000
-74.261	114.285
-174.472	31.145
0.000	0.000
-75.619	40.262
-173.290	17.117
0.000	0.000
-79.216	21.378
-170.538	12.166
0.000	0.000
-83.418	26.173
-173.660	9.055
0.000	0.000
-73.009	37.643
-171.870	14.142
0.000	0.000
-74.505	104.809
-170.538	30.414
0.000	0.000
-81.573	27.295
-171.254	13.153
0.000	0.000
-73.909	108.240
-174.094	29.155
0.000	0.000
-77.648	140.246
-174.644	32.140
0.000	0.000
-74.141	91.482
-176.309	31.064
0.000	0.000
-79.046	94.726
-174.560	21.095
0.000	0.000
-74.932	80.777
-175.030	23.087
0.000	0.000
-73.639	113.600
0.000	0.000
0.000	0.000
-77.361	169.098
0.000	0.000
0.000	0.000
-74.518	221.020
-172.528	61.522
0.000	0.000
-77.320	41.000
-171.870	14.142
0.000	0.000
-79.509	27.459
-174.806	11.045
0.000	0.000
-77.330	66.110
-174.472	15.572
0.000	0.000
-75.864	69.608
-172.875	20.156
0.000	0.000
-71.792	120.009
-172.451	41.863
90.000	0.500
-75.303	126.127
0.000	0.000
0.000	0.000
-72.646	33.526
-172.875	24.187
0.000	0.000
-74.784	129.541
-172.093	36.346
-90.000	1.000
-79.695	33.541
-173.660	9.055
0.000	0.000
-77.125	179.513
0.000	0.000
0.000	0.000
-75.489	87.801
-171.573	27.295
0.000	0.000
-82.850	281.187
-173.290	68.469
0.000	0.000
-79.046	31.575
-175.236	12.042
0.000	0.000
-81.634	34.366
-170.538	12.166
0.000	0.000
-71.338	159.380
0.000	0.000
0.000	0.000
-74.890	103.581
-174.289	30.150
0.000	0.000
-81.634	51.549
-177.274	10.512
0.000	0.000
-79.439	30.008
-167.905	7.159
0.000	0.000
-80.218	29.428
-176.987	9.513
180.000	0.500
-76.891	37.477
0.000	0.000
0.000	0.000
-73.009	112.929
-171.764	38.396
0.000	0.000
-68.350	70.472
-169.695	27.951
0.000	0.000
-75.256	19.647
-171.469	10.112
0.000	0.000
-70.897	108.473
-171.983	35.850
0.000	0.000
-80.074	20.304
-175.601	6.519
0.000	0.000
-71.565	61.664
-172.694	19.660
0.000	0.000
-81.634	17.183
-169.695	5.590
0.000	0.000
-80.248	32.469
-169.992	8.631
0.000	0.000
-75.530	48.023
-172.405	15.133
0.000	0.000
-72.296	185.799
0.000	0.000
0.000	0.000
-79.439	60.017
-175.236	12.042
0.000	0.000
-70.665	302.035
0.000	0.000
0.000	0.000
-81.703	48.508
-171.254	13.153
0.000	0.000
-72.239	134.406
-173.830	37.216
0.000	0.000
-73.261	138.885
-172.057	43.417
0.000	0.000
-72.423	168.885
-169.380	48.836
0.000	0.000
-82.071	362.465
-171.119	64.777
0.000	0.000
-74.441	264.700
0.000	0.000
0.000	0.000
-80.513	388.310
-171.870	63.640
0.000	0.000
-82.600	77.647
-173.660	18.111
-45.000	1.414
-80.440	192.676
-170.538	36.497
0.000	0.000
-76.430	59.666
-176.987	19.026
0.000	0.000
-76.171	133.881
-169.695	33.541
0.000	0.000
-78.871	62.169
-172.405	15.133
0.000	0.000
-81.870	77.782
-173.290	17.117
0.000	0.000
-76.569	137.768
-173.830	37.216
0.000	0.000
-81.798	336.442
-171.674	82.873
0.000	0.000
-77.619	41.976
-171.254	13.153
0.000	0.000
-82.011	57.559
-172.875	16.125
0.000	0.000
-75.256	157.175
-172.875	48.374
0.000	0.000
-75.466	111.571
-173.660	49.805
0.000	0.000
-77.530	213.026
-174.094	58.310
0.000	0.000
-79.824	39.623
-175.914	14.036
0.000	0.000
-80.538	42.579
-174.806	11.045
0.000	0.000
-73.695	153.160
-168.906	51.971
0.000	0.000
-79.796	152.411
0.000	0.000
0.000	0.000
-82.405	15.133
-168.690	10.198
0.000	0.000
-78.690	91.782
-172.235	22.204
0.000	0.000
-73.880	180.081
-172.011	57.559
0.000	0.000
-77.471	73.756
0.000	0.000
0.000	0.000
-81.584	396.268
-170.417	78.090
0.000	0.000
-82.704	291.359
-170.538	54.745
0.000	0.000
-79.077	58.052
-172.875	24.187
0.000	0.000
-74.476	224.179
0.000	0.000
0.000	0.000
-81.298	49.571
-174.289	10.050
0.000	0.000
-77.471	184.391
-172.185	51.478
0.000	0.000
-78.871	62.169
-173.418	26.173
0.000	0.000
-78.879	119.239
-175.601	39.115
0.000	0.000
-78.346	163.368
0.000	0.000
0.000	0.000
-76.310	80.281
-174.289	30.150
0.000	0.000
-78.970	120.221
-171.573	27.295
0.000	0.000
-81.396	153.730
0.000	0.000
0.000	0.000
-78.690	193.763
-175.601	39.115
0.000	0.000
-77.905	28.636
-170.538	12.166
0.000	0.000
-78.690	45.891
-175.914	14.036
0.000	0.000
-81.132	285.412
-170.538	54.745
0.000	0.000
-76.773	240.377
-169.902	74.148
0.000	0.000
-75.681	295.169
-171.973	78.772
0.000	0.000

## Sheet: 210321_12um_BUB1
											3.14159	s	µm	µm/s	s	µm	s	s	Event/min	Event/min	%			Growth rate			Shrink rate			Catastrophe			Rescue
angle raw	length raw		angle pol	angle depol	angle pause	length pol	length depol	length pause	N of Cata	N of rescue	G rate	G duration	G distance	S rate	S duration	S distance	Pause dur.	Time G+S	Freq Cata	Freq Rescue	% in pause			mean	SD	N	mean	SD	N	mean	SD	N	mean	SD	N
-78.906	103.942		-78.906	-169.695	0	103.942	22.361	0	1	0	0.007059	305.999	2.16005	0.197997	12.0003	2.37603	0	317.999	0.196079	0	0		second	0.00674322	0.00204301	184	0.250939	0.284129	184	0.00394296	0.00292207	184	0.0971641	0.102108	184
-169.695	22.361		-79.509	-171.469	0	54.918	20.224	0	1	0	0.00666635	162	1.07995	0.239993	9.00036	2.16003	0	171	0.370371	0	0		minute	0.404593	0.12258	184	15.0563	17.0477	184	0.236577	0.175324	184	5.82985	6.12645	184
0.000	0.000		-82.694	0	0	39.319	0	0	0	0	0.00461553	116.999	0.540015		0	0	0	116.999	0		0
-79.509	54.918		-78.465	-174.289	0	50.01	10.05	0	1	0	0.00734718	147	1.08004	0.359974	3.00025	1.08001	0	150	0.408164	0	0			Growth duration			Shrink duration
-171.469	20.224		-78.366	-173.089	0	104.139	33.242	0	1	0	0.007412	305.999	2.26806	0.29701	11.9998	3.56405	0	317.998	0.196079	0	0			mean	SD	N	mean	SD	N		TOTAL G+S	G dur	S dur.
0.000	0.000		-78.69	0	0	30.594	0	0	0	0	0.00720004	89.9996	0.648001		0	0	0	89.9996	0		0		sec	253.617	187.952	184	10.2919	10.8155	184	sec	48559.2	46665.5	1893.7
-82.694	39.319		-84.806	-172.875	0	22.091	8.062	0	1	0	0.00327245	66.0009	0.215985	0.288	2.9999	0.863972	0	69.0008	0.909079	0	0		min	4.22695	3.13253	184	0.171531	0.180258	184	min	809.32	777.758	31.5617
0.000	0.000		-77.307	0	0	113.78	0	0	0	0	0.00810832	332.998	2.70006		0	0	0	332.998	0		0
0.000	0.000		-79.571	-167.471	0	165.738	36.878	0	1	0	0.00662607	489	3.24015	0.161997	24.0002	3.88798	0	513	0.122699	0	0			G	C	S	R				TOTAL L G+S	G length	S length
-78.465	50.010		-78.871	0	0	62.169	0	0	0	0	0.00708184	183	1.29598		0	0	0	183	0		0			0.00674322	0.00394296	0.250939	0.0971641			µm	691.746	319.897	371.849
-174.289	10.050		-76.824	0	0	307.085	0	0	0	0	0.00842781	897.002	7.55977		0	0	0	897.002	0		0			mean	SD	N
0.000	0.000		-76.083	-172.147	0	116.417	29.275	0	1	0	0.00892043	338.999	3.02402	0.26101	11.9997	3.13205	0	350.998	0.176992	0	0		AVG Cata	0.383206	0.363528	184
-78.366	104.139		-79.695	-166.759	0	55.902	17.464	0	1	0	0.00654555	165.001	1.08002	0.152994	12.0003	1.83597	0	177.001	0.363635	0	0		AVG Rescue	0.0882374	0.470152	184
-173.089	33.242		-80.91	0	0	25.318	0	0	0	0	0.00575982	75.0001	0.431987		0	0	0	75.0001	0		0		AVG %pause	0.0314104	0.227667	184			<L>	J
0.000	0.000		-76.329	-169.114	0	76.158	26.476	0	1	0	0.00875654	222.001	1.94396	0.187191	15.0004	2.80795	0	237.001	0.270269	0	0								5.0626	-0.00330582
-78.690	30.594		-77.164	-170.134	0	81.025	23.345	0	1	0	0.00820278	237.001	1.94407	0.206996	12.0001	2.48397	0	249.001	0.253164	0	0		Total pause duration		0.225		EVENTs
0.000	0.000		-84.806	-178.885	0	33.136	4	0	1	0	0.00327245	98.9998	0.323973	1.84967	0.23351	0.431918	0	99.2333	0.606062	0	0		number of pause		4		Cat/min	Rescue/min	Pause/min		Cat/µm	Rescue/µm	Pause/µm
0.000	0.000		-83.157	-171.87	0	25.179	7.071	0	1	0	0.00432014	74.9989	0.324006	0.252003	2.99993	0.755993	0	77.9988	0.800012	0	0						0.209577	0.190104	0.00494242		0.509538	0.0161356	0.00578247
-84.806	22.091		-83.976	-174.56	0	200.105	21.095	0	1	0	0.003799	597	2.268	0.378023	5.99963	2.268	0	603	0.100503	0	0
-172.875	8.062		-82.405	-169.38	0	30.265	16.279	0	1	0	0.00480022	89.9985	0.432013	0.191993	9.00039	1.72802	0	98.9989	0.666678	0	0		pause dur./GS duration		0.000278011	min/min
0.000	0.000		-83.517	-174.52	0	44.283	12	0	1	0	0.00409086	131.999	0.539992	0.375247	3.43794	1.29008	0	135.437	0.454547	0	0		N pause / GS duration		0.00494242	event/min	0.00494242	by count	0.00494242	by count			0.00578247	by count
-77.307	113.780		-79.346	-174.644	0	102.772	32.14	0	1	0	0.00677233	303.001	2.05203	0.383987	9.0002	3.45596	0	312.001	0.198019	0	0
0.000	0.000		-78.024	-170.91	0	101.203	25.318	0	1	0	0.00763627	297.001	2.26798	0.225007	11.9996	2.7	0	309	0.20202	0	0		Counting
0.000	0.000		-76.474	0	0	218.048	0	0	0	0	0.00866011	636.001	5.50784		0	0	0	636.001	0		0		Catastrophe	Rescue	Pause	N of kymos	Frames ?
-79.571	165.738		-81.027	-177.25	0	38.471	10	0	1	0	0.00568445	114.001	0.648031	0.749477	1.43934	1.07876	0	115.44	0.526313	0	0		163	6	4		401
-167.471	36.878		-75.379	-169.82	0	23.77	8	0	1	0	0.00939138	69.0007	0.648013	0.200481	4.24179	0.850398	0	73.2425	0.869556	0	0
0.000	0.000		-79.509	-167.905	0	54.918	14.318	0	1	0	0.00666635	162	1.07995	0.167996	9.00029	1.51202	0	171	0.370371	0	0
-78.871	62.169		-76.675	0	0	117.154	0	0	0	0	0.00852662	342	2.91611		0	0	0	342	0		0
0.000	0.000		-83.501	-169.114	0	39.756	13.238	0	1	0	0.00410104	118.502	0.48598	0.187191	7.50021	1.40398	0	126.002	0.506322	0	0
0.000	0.000		-73.686	-165.964	90	21.36	8.246	0.5	1	0	0.0105367	61.4999	0.648005	0.144002	5.99974	0.863979	1.5	67.4997	0.975611	0	2.22223
-76.824	307.085		-78.254	-173.089	0	51.58	16.621	0	1	0	0.00748538	151.5	1.13403	0.29701	5.99989	1.78203	0	157.5	0.39604	0	0
0.000	0.000		-77.446	0	0	121.915	0	0	0	0	0.0080166	357.001	2.86194		0	0	0	357.001	0		0
0.000	0.000		-78.024	-172.504	0	84.336	19.164	0	1	0	0.00763627	247.501	1.88999	0.273594	7.50023	2.05202	0	255.001	0.242423	0	0
-76.083	116.417		-77.307	-169.695	0	56.89	16.771	0	1	0	0.00810832	166.499	1.35003	0.197997	9.0004	1.78205	0	175.499	0.360362	0	0
-172.147	29.275		-76.781	0	0	153.056	0	0	1	0	0.00845631	447.001	3.77999		0	0	0	447.001	0.134228		0
0.000	0.000		-72.719	0	0	94.255	0	0	0	0	0.0111996	270.001	3.02392		0	0	0	270.001	0		0
-79.695	55.902		-75.399	-166.373	0	122.972	33.956	0	1	0	0.00937796	357.002	3.34795	0.1485	24.0001	3.56402	0	381.002	0.168066	0	0
-166.759	17.464		-74.745	-165.964	0	22.804	8.246	0	1	0	0.00981809	66.0015	0.648009	0.144002	5.99974	0.863979	0	72.0012	0.909071	0	0
0.000	0.000		-78.079	-162.759	0	91.984	30.364	0	1	0	0.00760016	270.001	2.05205	0.116003	26.9989	3.13196	0	297	0.222222	0	0
-80.910	25.318		-77.074	-173.418	0	62.586	26.173	0	1	0	0.00826229	183	1.512	0.311997	9.00025	2.80805	0	192	0.327869	0	0
0.000	0.000		-74.638	-168.311	0	94.372	29.614	0	1	0	0.00989036	273.001	2.70008	0.174005	17.9993	3.13198	0	291	0.21978	0	0
0.000	0.000		-78.996	-173.089	0	73.348	33.242	0	1	0	0.00700029	215.998	1.51205	0.29701	11.9998	3.56405	0	227.998	0.27778	0	0
-76.329	76.158		-84.144	-171.254	0	39.205	13.153	0	1	0	0.0036923	117.001	0.432004	0.234004	5.99991	1.40401	0	123.001	0.512815	0	0
-169.114	26.476		-68.962	-174.289	0	27.857	10.05	0	1	0	0.0138465	78.0004	1.08003	0.359974	3.00025	1.08001	0	81.0006	0.769227	0	0
0.000	0.000		-78.198	0	0	68.447	0	0	0	0	0.0075221	201	1.51194		0	0	0	201	0		0
-77.164	81.025		-77.53	-169.939	0	213.026	62.968	0	1	0	0.00796123	624.002	4.96782	0.202903	33.0009	6.69597	0	657.003	0.0961536	0	0
-170.134	23.345		-85.914	-172.875	0	42.107	8.062	0	1	0	0.00257167	126	0.32403	0.288	2.9999	0.863972	0	129	0.476191	0	0
0.000	0.000		-77.196	-168.69	0	22.561	10.198	0	1	0	0.00818163	66	0.539988	0.179999	6.00001	1.08	0	72	0.909091	0	0
-84.806	33.136		-87.337	-164.249	0	301.325	40.522	0	3	2	0.00167442	902.999	1.512	0.127638	33	4.21205	0	935.999	0.199336	3.63637	0
179.00	4.000		-82.875	-168.69	0	16.125	10.198	0	1	0	0.00449999	48.0014	0.216006	0.179999	6.00001	1.08	0	54.0015	1.24996	0	0
0.000	0.000		-81.203	-168.69	0	170	30.594	0	1	0	0.00557116	504.001	2.80787	0.179999	18	3.23999	0	522.001	0.119047	0	0
-83.157	25.179		-78.541	0	0	75.505	0	0	1	0	0.00729745	222	1.62004		0	0	0	222	0.27027		0
-171.870	7.071		-76.159	-172.648	0	142.127	31.257	0	1	0	0.00886976	414	3.67209	0.279014	11.9994	3.348	0	426	0.144927	0	0
0.000	0.000		-83.157	-168.69	0	25.179	10.198	0	1	0	0.00432014	74.9989	0.324006	0.179999	6.00001	1.08	0	80.9989	0.800012	0	0
-83.976	200.105		-79.824	-175.601	0	39.623	13.038	0	1	0	0.00646185	116.999	0.756032	0.467968	3.00011	1.40396	0	119.999	0.512824	0	0
-174.560	21.095		-77.32	-170.538	0	41	24.331	0	1	0	0.00809974	120	0.971971	0.216007	11.9996	2.592	0	132	0.499999	0	0
0.000	0.000		-76.13	-167.471	0	166.865	55.317	0	1	0	0.00888909	485.999	4.32009	0.161997	36.0004	5.83197	0	521.999	0.123457	0	0
-82.405	30.265		-79.321	-171.158	0	89.042	22.771	0	1	0	0.0067886	262.5	1.78201	0.231423	10.5004	2.43004	0	273	0.228572	0	0
-169.380	16.279		-77.347	-167.905	0	50.22	14.318	0	1	0	0.00808192	147.001	1.18805	0.167996	9.00029	1.51202	0	156.001	0.40816	0	0
0.000	0.000		-79.261	-170.538	0	118.068	24.331	0	1	0	0.00682765	348.001	2.37603	0.216007	11.9996	2.592	0	360	0.172414	0	0
-83.517	44.283		-76.342	0	0	110.114	0	0	0	0	0.00874789	321.001	2.80808		0	0	0	321.001	0		0
180.000	12.000		-80.91	-176.309	0	50.636	15.532	0	1	0	0.00575982	150	0.863975	0.558058	2.99964	1.67398	0	153	0.399999	0	0
0.000	0.000		-83.494	-175.426	0	57.369	12.54	0	1	0	0.0041055	170.999	0.702035	0.449992	3.00007	1.35001	0	173.999	0.35088	0	0
-79.346	102.772		-76.097	0	0	156.072	0	0	1	0	0.00891109	454.499	4.05009		0	0	0	454.499	0.132013		0
-174.644	32.140		-77.619	-167.8	0	167.905	37.855	0	1	0	0.00790259	492	3.88808	0.166506	23.9991	3.99601	0	515.999	0.121951	0	0
0.000	0.000		-80.134	0	0	93.381	0	0	1	0	0.00626099	276	1.72803		0	0	0	276	0.217391		0
-78.024	101.203		-75.027	-172.405	90	89.022	30.265	1	1	0	0.00962798	257.998	2.48401	0.269987	12.0004	3.23994	3	269.999	0.232559	0	1.11112
-170.910	25.318		-81.336	-167.471	0	212.424	46.098	0	1	1	0.00548562	630	3.45594	0.161997	30.0006	4.86003	0	660.001	0.0952381	1.99996	0
0.000	0.000		-81.983	-168.69	0	23.9	6.799	0	1	0	0.00507036	70.9993	0.359992	0.179999	4.0002	0.720032	0	74.9995	0.845079	0	0
-76.474	218.048		-76.592	-170.34	0	58.94	15.892	0	1	0	0.00858171	172.001	1.47606	0.211497	8.00009	1.692	0	180.001	0.348836	0	0
0.000	0.000		-82.235	-172.405	0	14.802	5.044	0	1	0	0.00490898	43.9988	0.21599	0.269987	1.99999	0.539973	0	45.9988	1.36367	0	0
0.000	0.000		-79.019	-172.875	0	136.499	32.249	0	1	0	0.0069853	401.999	2.80809	0.288	12	3.456	0	413.999	0.149254	0	0
-81.027	38.471		-81.085	-175.236	0	51.624	12.042	0	1	0	0.0056471	153.001	0.864013	0.431967	3.00033	1.29604	0	156.001	0.392154	0	0
180.000	10.000		-82.405	-169.695	0	45.398	11.18	0	1	0	0.00480022	134.999	0.648027	0.197997	5.99991	1.18796	0	140.999	0.444447	0	0
0.000	0.000		-80.754	-171.027	0	21.783	9.618	0	1	0	0.00586039	64.5	0.377995	0.22799	4.50033	1.02603	0	69.0003	0.930233	0	0
-75.379	23.770		-75.53	-171.87	0	16.008	7.071	0	1	0	0.00929012	46.5006	0.431997	0.252003	2.99993	0.755993	0	49.5005	1.29031	0	0
180.000	8.000		-78.535	-162.536	0	181.114	46.65	0	1	0	0.00730138	532.5	3.88799	0.114428	41.9999	4.80597	0	574.5	0.112676	0	0
0.000	0.000		-78.085	-172.875	0	55.7	16.125	0	1	0	0.00759623	163.5	1.24198	0.288	6.00017	1.72805	0	169.5	0.366973	0	0
-79.509	54.918		-77.471	-177.138	0	18.439	10.012	0	1	0	0.00800012	53.9997	0.432004	0.720101	1.49971	1.07995	0	55.4994	1.11112	0	0
-167.905	14.318		-75.964	-173.48	0	61.847	17.614	0	1	0	0.00899983	180.001	1.61998	0.31499	6.00021	1.89001	0	186.002	0.333331	0	0
0.000	0.000		-82.235	-176.987	0	33.305	9.513	0	1	0	0.00490898	98.9988	0.485984	0.683951	1.50008	1.02598	0	100.499	0.606068	0	0
-76.675	117.154		-80.34	-177.138	0	47.676	10.012	0	1	0	0.00612772	141	0.86401	0.720101	1.49971	1.07995	0	142.5	0.425532	0	0
0.000	0.000		-75.892	0	0	96.408	0	0	0	0	0.00904791	280.5	2.53795		0	0	0	280.5	0		0
0.000	0.000		-83.047	-173.66	0	20.652	13.583	0	1	0	0.00439027	61.5004	0.270003	0.32401	4.49984	1.45799	0	66.0002	0.975604	0	0
-83.501	39.756		-77.242	-169.54	90	135.854	33.049	1	1	0	0.00815124	397.5	3.24012	0.194998	18	3.50998	3	415.5	0.150943	0	0.722022
-169.114	13.238		-76.874	-171.607	0	114.491	30.83	0	1	0	0.00839468	334.499	2.80801	0.243998	13.5	3.29398	0	347.999	0.179373	0	0
0.000	0.000		-76.524	-168.024	0	111.572	33.734	0	1	0	0.00862688	325.5	2.80806	0.169716	20.9996	3.56397	0	346.5	0.184332	0	0
-73.686	21.360		-86.319	-172.875	0	342.707	72.56	0	1	1	0.00231603	1026	2.37624	0.288	26.9998	7.77597	0	1053	0.0584795	2.22224	0
-165.964	8.246		-76.866	-173.089	0	61.612	33.242	0	1	0	0.00839998	180.001	1.51201	0.29701	11.9998	3.56405	0	192.001	0.333332	0	0
180.000	0.500		-83.884	-168.69	0	28.16	5.099	0	1	0	0.00385745	83.9992	0.324023	0.179999	3.00001	0.539998	0	86.9992	0.714293	0	0
-78.254	51.580		-82.875	-169.24	0	40.311	5	0	1	0	0.00449999	119.999	0.539995	0.189437	2.80043	0.530506	0	122.8	0.500004	0	0
-173.089	16.621		-79.992	-167.471	0	34.525	9.22	0	1	0	0.00635295	101.999	0.647995	0.161997	6.00039	0.972047	0	107.999	0.588241	0	0
0.000	0.000		-72.897	-161.565	0	13.601	6.325	0	1	0	0.0110771	38.9986	0.431992	0.108	6.00044	0.648045	0	44.999	1.53852	0	0
-77.446	121.915		-78.154	-168.232	0	104.731	36.773	0	1	0	0.00755095	307.502	2.32193	0.172804	22.4995	3.88801	0	330.001	0.195121	0	0
0.000	0.000		-76.329	-170.538	0	19.039	21.29	0	1	0	0.00875654	55.4988	0.485978	0.216007	10.4998	2.26804	0	65.9986	1.0811	0	0
0.000	0.000		-81.87	-171.027	0	28.284	9.618	0	1	0	0.00514279	83.9992	0.43199	0.22799	4.50033	1.02603	0	88.4995	0.714292	0	0
-78.024	84.336		-78.69	-170.272	0	58.639	17.755	0	1	0	0.00720004	172.501	1.24201	0.209991	9.00024	1.88997	0	181.501	0.347825	0	0
-172.504	19.164		-78.555	-167.471	0	83.153	18.439	0	1	0	0.00728829	244.499	1.78198	0.161997	12.0001	1.94399	0	256.499	0.2454	0	0
0.000	0.000		-81.098	-170.754	0	168.024	43.566	0	1	0	0.00563873	498	2.80809	0.221145	20.9997	4.644	0	519	0.120482	0	0
-77.307	56.890		-81.119	-174.806	0	32.388	11.045	0	1	0	0.00562521	95.9991	0.540016	0.396032	2.99965	1.18796	0	98.9988	0.625006	0	0
-169.695	16.771		-78.906	0	0	103.942	0	0	0	0	0.007059	305.999	2.16005		0	0	0	305.999	0		0
0.000	0.000		-83.29	-171.254	0	34.234	13.153	0	1	0	0.00423539	101.999	0.432004	0.234004	5.99991	1.40401	0	107.998	0.588244	0	0
-76.781	153.056		-81.439	-167.471	0	282.144	36.878	0	1	0	0.00541942	837.001	4.53606	0.161997	24.0002	3.88798	0	861.001	0.0716845	0	0
0.000	0.000		-83.66	-165.964	0	9.055	8.246	0	1	0	0.00399987	26.9989	0.107992	0.144002	5.99974	0.863979	0	32.9986	2.22232	0	0
0.000	0.000		-76.357	-169.695	0	105.991	33.541	0	1	0	0.00873791	309.001	2.70003	0.197997	18.0003	3.564	0	327.001	0.194174	0	0
-72.719	94.255		-79.563	0	0	115.918	0	0	0	0	0.00663126	342	2.2679		0	0	0	342	0		0
0.000	0.000		-77.005	-170.538	0	13.342	6.083	0	1	0	0.00830794	39.0009	0.324018	0.216007	3.00002	0.648026	0	42.0009	1.53843	0	0
0.000	0.000		-79.492	-167.661	0	126.115	32.757	0	1	0	0.0066774	372	2.48399	0.164572	21.0001	3.45604	0	393	0.16129	0	0
-75.399	122.972		-78.69	-168.69	0	81.584	20.396	0	1	0	0.00720004	239.999	1.728	0.179999	12	2.15999	0	251.999	0.250001	0	0
-166.373	33.956		-81.634	-173.66	0	34.366	9.055	0	1	0	0.00529419	102.001	0.540012	0.32401	2.99978	0.971959	0	105.001	0.58823	0	0
0.000	0.000		-75.396	-164.624	0	146.741	41.485	0	2	1	0.00937997	426	3.99587	0.130911	32.9995	4.32001	0	459	0.28169	1.81821	0
-74.745	22.804		-75.641	-169.824	0	129.031	39.623	0	1	0	0.00921577	375.001	3.45592	0.200561	21.0009	4.21197	0	396.001	0.16	0	0
-165.964	8.246		-79.34	-172.875	0	86.493	24.187	0	1	0	0.00677624	255.001	1.72795	0.288	9.00006	2.59202	0	264.001	0.235293	0	0
0.000	0.000		-76.961	-171.119	0	97.514	32.388	0	1	0	0.00833706	284.999	2.37606	0.230391	15.0004	3.45597	0	300	0.210527	0	0
-78.079	91.984		-81.254	-168.69	0	26.306	10.198	0	1	0	0.00553835	78.0004	0.431994	0.179999	6.00001	1.08	0	84.0004	0.769227	0	0
-162.759	30.364		-78.486	-171.87	0	55.109	14.142	0	1	0	0.00733344	162	1.18802	0.252003	5.99987	1.51199	0	168	0.37037	0	0
0.000	0.000		-80.189	-172.093	0	134.974	36.346	0	1	1	0.00622539	399	2.48393	0.259205	14.9999	3.88805	0	414	0.150376	4.00003	0
-77.074	62.586		-77.106	0	0	85.147	0	0	0	0	0.00824112	249	2.05204		0	0	0	249	0		0
-173.418	26.173		-77.598	0	0	195.563	0	0	0	0	0.00791642	572.998	4.5361		0	0	0	572.998	0		0
0.000	0.000		-86.532	179	0	33.061	5	0	1	0	0.00218167	99.0014	0.215989	-2.06244	-0.261786	0.539918	0	98.7396	0.606052	0	0
-74.638	94.372		-81.027	-169.38	0	38.471	16.279	0	1	0	0.00568445	114.001	0.648031	0.191993	9.00039	1.72802	0	123.001	0.526313	0	0
-168.311	29.614		-81.741	-168.111	0	62.65	19.416	0	1	0	0.00522552	186.001	0.971952	0.170995	12	2.05195	0	198.001	0.322579	0	0
0.000	0.000		-80.372	-170.538	90	113.6	24.331	2	1	0	0.00610704	336	2.05196	0.216007	11.9996	2.592	6	347.999	0.178572	0	1.72414
-78.996	73.348		-79.695	0	0	78.262	0	0	0	0	0.00654555	230.999	1.51201		0	0	0	230.999	0		0
-173.089	33.242		-80.538	-173.29	0	85.159	17.117	0	1	0	0.00599979	252.001	1.51195	0.305992	6.00006	1.83597	0	258.001	0.238094	0	0
0.000	0.000		-83.418	-169.695	0	26.173	11.18	0	1	0	0.00415388	78.0015	0.324009	0.197997	5.99991	1.18796	0	84.0014	0.769216	0	0
-84.144	39.205		-75.964	-172.147	0	86.585	29.275	0	1	0	0.00899983	252	2.26796	0.26101	11.9997	3.13205	0	263.999	0.238096	0	0
-171.254	13.153		-78.132	-169.992	0	141.014	34.525	0	1	0	0.00756539	413.999	3.13207	0.203999	17.9999	3.67196	0	431.999	0.144928	0	0
0.000	0.000		-80.538	-164.055	0	18.248	14.56	0	1	0	0.00599979	53.9992	0.323984	0.126003	11.9995	1.51198	0	65.9987	1.11113	0	0
-68.962	27.857		-82.846	-162.646	0	248.938	67.052	0	1	0	0.00451849	741	3.34821	0.1152	59.9997	6.91198	0	801	0.0809717	0	0
-174.289	10.050		-76.759	0	0	69.857	0	0	1	0	0.0084709	204	1.72806		0	0	0	204	0.294118		0
0.000	0.000		-83.884	-173.66	0	28.16	9.055	0	1	0	0.00385745	83.9992	0.324023	0.32401	2.99978	0.971959	0	86.9989	0.714293	0	0
-78.198	68.447		-82.875	-168.69	0	64.498	10.198	0	1	0	0.00449999	192	0.863997	0.179999	6.00001	1.08	0	198	0.3125	0	0
0.000	0.000		-82.875	-179	0	16.125	6	0	1	0	0.00449999	48.0014	0.216006	2.06244	0.314143	0.647901	0	48.3156	1.24996	0	0
0.000	0.000		-87.184	-173.66	0	183.221	36.222	0	1	0	0.00177077	548.999	0.972152	0.32401	11.9998	3.88805	0	560.999	0.10929	0	0
-77.530	213.026		-79.563	-170.91	0	115.918	25.318	0	1	0	0.00663126	342	2.2679	0.225007	11.9996	2.7	0	354	0.175438	0	0
-169.939	62.968		-79.592	-168.232	0	99.639	24.515	0	1	0	0.00661243	293.999	1.94405	0.172804	14.9995	2.59197	0	308.998	0.204083	0	0
0.000	0.000		-78.69	-171.469	0	86.683	40.447	0	1	0	0.00720004	254.999	1.836	0.239993	18.0003	4.31994	0	272.999	0.235295	0	0
-85.914	42.107		-80.91	-168.69	0	25.318	10.198	0	1	0	0.00575982	75.0001	0.431987	0.179999	6.00001	1.08	0	81.0001	0.799999	0	0
-172.875	8.062		-81.254	-175.601	0	26.306	13.038	0	1	0	0.00553835	78.0004	0.431994	0.467968	3.00011	1.40396	0	81.0005	0.769227	0	0
0.000	0.000		-77.471	-167.005	0	36.878	13.342	0	1	0	0.00800012	107.999	0.864009	0.155995	9.00049	1.40403	0	117	0.555559	0	0
-77.196	22.561		-75.84	-161.565	0	224.831	69.57	0	1	0	0.00908265	653.999	5.94006	0.108	66.0001	7.12799	0	720	0.0917432	0	0
-168.690	10.198		-80.695	-166.504	0	179.36	51.42	0	1	0	0.00589845	531	3.13208	0.149997	36.0008	5.40001	0	567.001	0.112994	0	0
0.000	0.000		-76.945	-168.111	0	141.662	38.833	0	1	0	0.00834765	414.002	3.45595	0.170995	24.0007	4.104	0	438.002	0.144927	0	0
-87.337	301.325		-79.439	-169.38	0	60.017	16.279	0	1	0	0.00671185	177.001	1.18801	0.191993	9.00039	1.72802	0	186.001	0.338981	0	0
-164.249	40.522		-79.695	-174.289	0	44.721	10.05	0	1	0	0.00654555	131.999	0.864006	0.359974	3.00025	1.08001	0	134.999	0.454549	0	0
0.000	0.000		-81.069	-173.29	0	70.859	17.117	0	1	0	0.0056574	210	1.18805	0.305992	6.00006	1.83597	0	216	0.285715	0	0
-82.875	16.125		-77.712	-168.232	0	103.368	24.515	0	1	0	0.00784136	303	2.37593	0.172804	14.9995	2.59197	0	317.999	0.19802	0	0
-168.690	10.198		-73.301	0	0	52.202	0	0	0	0	0.0107998	150.002	1.61999		0	0	0	150.002	0		0
0.000	0.000		-75.194	-169.756	0	117.398	42.172	0	1	0	0.00951563	340.5	3.24008	0.199202	22.4997	4.48197	0	363	0.176211	0	0
-81.203	170.000		-80.538	-168.232	0	97.324	24.515	0	1	0	0.00599979	288	1.72794	0.172804	14.9995	2.59197	0	302.999	0.208334	0	0
-168.690	30.594		-82.405	-171.254	0	30.265	13.153	0	1	0	0.00480022	89.9985	0.432013	0.234004	5.99991	1.40401	0	95.9984	0.666678	0	0
0.000	0.000		-82.648	-171.254	0	125.028	26.306	0	1	0	0.00464491	372	1.72791	0.234004	11.9998	2.80801	0	384	0.16129	0	0
-78.541	75.505		-86.82	-165.964	0	18.028	8.246	0	1	0	0.00200011	54.0007	0.108007	0.144002	5.99974	0.863979	0	60.0005	1.1111	0	0
0.000	0.000		-80.538	-173.66	0	18.248	9.055	0	1	0	0.00599979	53.9992	0.323984	0.32401	2.99978	0.971959	0	56.999	1.11113	0	0
0.000	0.000		-76.551	0	0	141.891	0	0	0	0	0.00860894	414	3.56411		0	0	0	414	0		0
-76.159	142.127		-80.194	-169.875	0	82.201	28.443	0	1	0	0.00622216	243	1.51199	0.201593	15.0005	3.024	0	258.001	0.246913	0	0
-172.648	31.257		-79.579	-170.218	0	88.459	29.428	0	1	0	0.00662087	261	1.72805	0.208809	14.9994	3.13202	0	275.999	0.229885	0	0
0.000	0.000		-78.906	0	0	103.942	0	0	0	0	0.007059	305.999	2.16005		0	0	0	305.999	0		0
-83.157	25.179		-85.426	-173.66	0	25.08	9.055	0	1	0	0.00288005	75.0004	0.216005	0.32401	2.99978	0.971959	0	78.0002	0.799996	0	0
-168.690	10.198		-74.358	-170.538	0	51.923	18.248	0	1	0	0.0100798	150	1.51198	0.216007	8.99955	1.94397	0	159	0.4	0	0
0.000	0.000		-81.87	-170.538	0	21.213	12.166	0	1	0	0.00514279	62.9994	0.323993	0.216007	6.00003	1.29605	0	68.9994	0.95239	0	0
-79.824	39.623		-76.908	0	0	176.59	0	0	0	0	0.00837216	516	4.32004		0	0	0	516	0		0
-175.601	13.038		-75.379	-169.287	0	71.309	37.656	0	1	0	0.00939138	206.999	1.94401	0.190288	20.9996	3.99597	0	227.999	0.289856	0	0
0.000	0.000		-80.538	-167.905	0	36.497	14.318	0	1	0	0.00599979	108.001	0.647986	0.167996	9.00029	1.51202	0	117.002	0.555549	0	0
-77.320	41.000		-83.29	-176.186	0	34.234	15.033	0	1	0	0.00423539	101.999	0.432004	0.54001	2.99988	1.61997	0	104.998	0.588244	0	0
-170.538	24.331		-85.515	-167.905	0	51.157	14.318	0	1	0	0.00282378	153.001	0.432041	0.167996	9.00029	1.51202	0	162.001	0.392154	0	0
0.000	0.000		-79.832	-167.196	0	186.936	45.122	0	1	0	0.00645666	552	3.56408	0.158403	29.9993	4.752	0	581.999	0.108696	0	0
-76.130	166.865		-78.486	0	0	55.109	0	0	0	0	0.00733344	162	1.18802		0	0	0	162	0		0
-167.471	55.317		-86.055	-171.254	0	29.069	13.153	0	1	0	0.00248264	87.0004	0.215991	0.234004	5.99991	1.40401	0	93.0003	0.689652	0	0
0.000	0.000		-75.53	-172.405	0	32.016	15.133	0	1	0	0.00929012	93.0012	0.863993	0.269987	6.00038	1.62003	0	99.0016	0.645153	0	0
-79.321	89.042		-81.718	-169.046	0	159.665	31.575	0	1	0	0.00524028	474	2.48389	0.186001	17.9997	3.34797	0	491.999	0.126582	0	0
-171.158	22.771		-79.76	-162.553	0	157.509	36.688	0	1	0	0.00650337	465	3.02407	0.114547	32.9998	3.78002	0	498	0.129032	0	0
0.000	0.000		-82.93	-174.806	0	129.988	22.091	0	1	0	0.00446489	386.999	1.72791	0.396032	5.99958	2.37603	0	392.998	0.155039	0	0
-77.347	50.220		-79.38	0	0	65.115	0	0	0	0	0.00675022	191.999	1.29604		0	0	0	191.999	0		0
-167.905	14.318		-78.275	-168.69	0	162.388	40.792	0	1	0	0.00747162	476.999	3.56396	0.179999	24	4.31998	0	500.999	0.125786	0	0
0.000	0.000		-75.7	-175.601	0	52.631	13.038	0	1	0	0.00917628	153.001	1.40398	0.467968	3.00011	1.40396	0	156.001	0.392155	0	0
-79.261	118.068		-78.323	-169.479	0	76.585	35.598	0	1	0	0.00744016	225	1.67404	0.193842	19.5001	3.77995	0	244.5	0.266667	0	0
-170.538	24.331		-77.803	-166.787	0	215.361	59.064	0	1	0	0.00778149	631.499	4.91401	0.15333	40.5011	6.21004	0	672	0.095012	0	0
0.000	0.000		-83.29	-173.66	0	34.234	13.583	0	1	0	0.00423539	101.999	0.432004	0.32401	4.49984	1.45799	0	106.498	0.588244	0	0
-76.342	110.114		-78.734	-164.745	0	127.966	28.504	0	1	0	0.00717129	376.501	2.7	0.132001	22.4995	2.96996	0	399	0.159362	0	0
0.000	0.000		-77.196	-167.005	0	33.842	13.342	0	1	0	0.00818163	99.0014	0.809994	0.155995	9.00049	1.40403	0	108.002	0.606052	0	0
0.000	0.000		-79.063	-167.093	0	210.829	49.244	0	1	0	0.00695661	620.999	4.32005	0.157096	32.9988	5.18398	0	653.998	0.0966186	0	0
-80.910	50.636		-79.426	-169.114	0	76.295	26.476	0	1	0	0.0067203	224.998	1.51206	0.187191	15.0004	2.80795	0	239.999	0.266669	0	0
-176.309	15.532
0.000	0.000
-83.494	57.369
-175.426	12.540
0.000	0.000
-76.097	156.072
0.000	0.000
0.000	0.000
-77.619	167.905
-167.800	37.855
0.000	0.000
-80.134	93.381
0.000	0.000
0.000	0.000
-75.027	89.022
-172.405	30.265
180.000	1.000
-81.336	212.424
-167.471	46.098
0.000	0.000
-81.983	23.900
-168.690	6.799
0.000	0.000
-76.592	58.940
-170.340	15.892
0.000	0.000
-82.235	14.802
-172.405	5.044
0.000	0.000
-79.019	136.499
-172.875	32.249
0.000	0.000
-81.085	51.624
-175.236	12.042
0.000	0.000
-82.405	45.398
-169.695	11.180
0.000	0.000
-80.754	21.783
-171.027	9.618
0.000	0.000
-75.530	16.008
-171.870	7.071
0.000	0.000
-78.535	181.114
-162.536	46.650
0.000	0.000
-78.085	55.700
-172.875	16.125
0.000	0.000
-77.471	18.439
-177.138	10.012
0.000	0.000
-75.964	61.847
-173.480	17.614
0.000	0.000
-82.235	33.305
-176.987	9.513
0.000	0.000
-80.340	47.676
-177.138	10.012
0.000	0.000
-75.892	96.408
0.000	0.000
0.000	0.000
-83.047	20.652
-173.660	13.583
0.000	0.000
-77.242	135.854
-169.540	33.049
45.000	0.707
-76.874	114.491
-171.607	30.830
0.000	0.000
-76.524	111.572
-168.024	33.734
0.000	0.000
-86.319	342.707
-172.875	72.560
0.000	0.000
-76.866	61.612
-173.089	33.242
0.000	0.000
-83.884	28.160
-168.690	5.099
0.000	0.000
-82.875	40.311
179.00	5.000
0.000	0.000
-79.992	34.525
-167.471	9.220
0.000	0.000
-72.897	13.601
-161.565	6.325
0.000	0.000
-78.154	104.731
-168.232	36.773
0.000	0.000
-76.329	19.039
-170.538	21.290
0.000	0.000
-81.870	28.284
-171.027	9.618
0.000	0.000
-78.690	58.639
-170.272	17.755
0.000	0.000
-78.555	83.153
-167.471	18.439
0.000	0.000
-81.098	168.024
-170.754	43.566
0.000	0.000
-81.119	32.388
-174.806	11.045
0.000	0.000
-78.906	103.942
0.000	0.000
0.000	0.000
-83.290	34.234
-171.254	13.153
0.000	0.000
-81.439	282.144
-167.471	36.878
0.000	0.000
-83.660	9.055
-165.964	8.246
0.000	0.000
-76.357	105.991
-169.695	33.541
0.000	0.000
-79.563	115.918
0.000	0.000
0.000	0.000
-77.005	13.342
-170.538	6.083
0.000	0.000
-79.492	126.115
-167.661	32.757
0.000	0.000
-78.690	81.584
-168.690	20.396
0.000	0.000
-81.634	34.366
-173.660	9.055
0.000	0.000
-75.396	146.741
-164.624	41.485
0.000	0.000
-75.641	129.031
-169.824	39.623
0.000	0.000
-79.340	86.493
-172.875	24.187
0.000	0.000
-76.961	97.514
-171.119	32.388
0.000	0.000
-81.254	26.306
-168.690	10.198
0.000	0.000
-78.486	55.109
-171.870	14.142
0.000	0.000
-80.189	134.974
-172.093	36.346
0.000	0.000
-77.106	85.147
0.000	0.000
0.000	0.000
-77.598	195.563
0.000	0.000
0.000	0.000
-86.532	33.061
179.00	5.000
0.000	0.000
-81.027	38.471
-169.380	16.279
0.000	0.000
-81.741	62.650
-168.111	19.416
0.000	0.000
-80.372	113.600
-170.538	24.331
116.565	2.236
-79.695	78.262
0.000	0.000
0.000	0.000
-80.538	85.159
-173.290	17.117
0.000	0.000
-83.418	26.173
-169.695	11.180
0.000	0.000
-75.964	86.585
-172.147	29.275
0.000	0.000
-78.132	141.014
-169.992	34.525
0.000	0.000
-80.538	18.248
-164.055	14.560
0.000	0.000
-82.846	248.938
-162.646	67.052
0.000	0.000
-76.759	69.857
0.000	0.000
0.000	0.000
-83.884	28.160
-173.660	9.055
0.000	0.000
-82.875	64.498
-168.690	10.198
0.000	0.000
-82.875	16.125
179.00	6.000
0.000	0.000
-87.184	183.221
-173.660	36.222
0.000	0.000
-79.563	115.918
-170.910	25.318
0.000	0.000
-79.592	99.639
-168.232	24.515
0.000	0.000
-78.690	86.683
-171.469	40.447
0.000	0.000
-80.910	25.318
-168.690	10.198
0.000	0.000
-81.254	26.306
-175.601	13.038
0.000	0.000
-77.471	36.878
-167.005	13.342
0.000	0.000
-75.840	224.831
-161.565	69.570
0.000	0.000
-80.695	179.360
-166.504	51.420
0.000	0.000
-76.945	141.662
-168.111	38.833
0.000	0.000
-79.439	60.017
-169.380	16.279
0.000	0.000
-79.695	44.721
-174.289	10.050
0.000	0.000
-81.069	70.859
-173.290	17.117
0.000	0.000
-77.712	103.368
-168.232	24.515
0.000	0.000
-73.301	52.202
0.000	0.000
0.000	0.000
-75.194	117.398
-169.756	42.172
0.000	0.000
-80.538	97.324
-168.232	24.515
0.000	0.000
-82.405	30.265
-171.254	13.153
0.000	0.000
-82.648	125.028
-171.254	26.306
0.000	0.000
-86.820	18.028
-165.964	8.246
0.000	0.000
-80.538	18.248
-173.660	9.055
0.000	0.000
-76.551	141.891
0.000	0.000
0.000	0.000
-80.194	82.201
-169.875	28.443
0.000	0.000
-79.579	88.459
-170.218	29.428
0.000	0.000
-78.906	103.942
0.000	0.000
0.000	0.000
-85.426	25.080
-173.660	9.055
0.000	0.000
-74.358	51.923
-170.538	18.248
0.000	0.000
-81.870	21.213
-170.538	12.166
0.000	0.000
-76.908	176.590
0.000	0.000
0.000	0.000
-75.379	71.309
-169.287	37.656
0.000	0.000
-80.538	36.497
-167.905	14.318
0.000	0.000
-83.290	34.234
-176.186	15.033
0.000	0.000
-85.515	51.157
-167.905	14.318
0.000	0.000
-79.832	186.936
-167.196	45.122
0.000	0.000
-78.486	55.109
0.000	0.000
0.000	0.000
-86.055	29.069
-171.254	13.153
0.000	0.000
-75.530	32.016
-172.405	15.133
0.000	0.000
-81.718	159.665
-169.046	31.575
0.000	0.000
-79.760	157.509
-162.553	36.688
0.000	0.000
-82.930	129.988
-174.806	22.091
0.000	0.000
-79.380	65.115
0.000	0.000
0.000	0.000
-78.275	162.388
-168.690	40.792
0.000	0.000
-75.700	52.631
-175.601	13.038
0.000	0.000
-78.323	76.585
-169.479	35.598
0.000	0.000
-77.803	215.361
-166.787	59.064
0.000	0.000
-83.290	34.234
-173.660	13.583
0.000	0.000
-78.734	127.966
-164.745	28.504
0.000	0.000
-77.196	33.842
-167.005	13.342
0.000	0.000
-79.063	210.829
-167.093	49.244
0.000	0.000
-79.426	76.295
-169.114	26.476
0.000	0.000

## Sheet: 210215_BUB1_002
											3.14159	s	µm	µm/s	s	µm	s	s	Event/min	Event/min	%			Growth rate			Shrink rate			Catastrophe			Rescue
angle raw	length raw		angle pol	angle depol	angle pause	length pol	length depol	length pause	N of Cata	N of rescue	G rate	G duration	G distance	S rate	S duration	S distance	Pause dur.	Time G+S	Freq Cata	Freq Rescue	% in pause			mean	SD	N	mean	SD	N	mean	SD	N	mean	SD	N
-80.538	42.579		-80.538	-174.898	0	42.579	56.223	0	1	0	0.00599979	125.999	0.755968	0.403213	14.9996	6.04803	0	140.999	0.476194	0	0		second	0.00604798	0.00185988	262	0.258968	0.124266	262	0.00387147	0.00245058	262	0.108042	0.0774698	262
-174.898	56.223		-79.287	-176.424	0	37.656	16.031	0	1	0	0.00681072	110.999	0.755985	0.576053	2.99968	1.72798	0	113.999	0.540545	0	0		minute	0.362879	0.111593	262	15.5381	7.45597	262	0.232288	0.147035	262	6.4825	4.64819	262
0.000	0.000		-73.74	-174.289	0	25	10.05	0	1	0	0.0104998	72.0001	0.755991	0.359974	3.00025	1.08001	0	75.0003	0.833332	0	0
-79.287	37.656		-75.256	-170.538	0	39.294	12.166	0	1	0	0.00947397	114	1.08004	0.216007	6.00003	1.29605	0	120	0.526314	0	0			Growth duration			Shrink duration
-176.424	16.031		-74.745	-172.405	0	34.205	15.133	0	1	0	0.00981809	98.9993	0.971985	0.269987	6.00038	1.62003	0	105	0.606065	0	0			mean	SD	N	mean	SD	N		TOTAL G+S	G dur	S dur.
0.000	0.000		-75.256	-176.987	0	58.941	19.026	0	1	0	0.00947397	171.001	1.62006	0.683951	3.00016	2.05197	0	174.001	0.350876	0	0		sec	258.3	163.499	262	9.25569	6.63667	262	sec	70099.5	67674.5	2424.99
-73.740	25.000		-78.092	0	0	150.233	0	0	0	0	0.00759163	441	3.34791		0	0	0	441	0		0		min	4.30499	2.72499	262	0.154262	0.110611	262	min	1168.32	1127.91	40.4165
-174.289	10.050		-76.608	-171.254	-90	107.935	26.306	1	1	1	0.00857109	315	2.6999	0.234004	11.9998	2.80801	3	327	0.190476	5.00007	0.917431
0.000	0.000		-81.674	-167.005	0	41.437	13.342	0	1	0	0.00526851	123.001	0.648032	0.155995	9.00049	1.40403	0	132.001	0.487802	0	0			G	C	S	R				TOTAL L G+S	G length	S length
-75.256	39.294		-77.221	-172.875	0	99.464	24.187	0	1	0	0.00816512	291.001	2.37606	0.288	9.00006	2.59202	0	300.001	0.206185	0	0			0.00604798	0.00387147	0.258968	0.108042			µm	969.967	415.89	554.076
-170.538	12.166		-80.961	-171.87	0	89.107	28.284	0	1	0	0.00572696	264.001	1.51193	0.252003	11.9997	3.02397	0	276.001	0.227272	0	0			mean	SD	N
0.000	0.000		-78.97	-173.29	0	60.11	22.823	0	1	0	0.00701725	176.999	1.24205	0.305992	8.0002	2.448	0	184.999	0.338985	0	0		AVG Cata	0.346476	0.279197	262
-74.745	34.205		-83.32	-174.644	0	37.253	10.713	0	1	0	0.00421628	111	0.468009	0.383987	2.99997	1.15195	0	114	0.540539	0	0		AVG Rescue	0.0600375	0.436743	262
-172.405	15.133		-82.983	-168.69	0	43.66	6.799	0	1	0	0.00443108	129.999	0.576037	0.179999	4.0002	0.720032	0	133.999	0.461542	0	0		AVG %pause	0.0827961	0.463694	262			<L>	J
0.000	0.000		-85.786	-167.152	0	158.763	19.488	0	1	0	0.00265252	475.001	1.25995	0.157842	13.0004	2.05201	0	488.002	0.126315	0	0								4.48579	-0.00311988
-75.256	58.941		-80.779	-171.87	0	78.008	14.142	0	1	0	0.00584426	231	1.35003	0.252003	5.99987	1.51199	0	237	0.25974	0	0		Total pause duration		0.9		EVENTs
-176.987	19.026		-77.661	-174.958	0	49.135	17.066	0	1	0	0.00787493	144	1.13399	0.408036	4.49959	1.836	0	148.5	0.416667	0	0		number of pause		12		Cat/min	Rescue/min	Pause/min		Cat/µm	Rescue/µm	Pause/µm
0.000	0.000		-76.083	-164.055	0	58.209	14.56	0	1	0	0.00892043	169.501	1.51202	0.126003	11.9995	1.51198	0	181.5	0.353981	0	0						0.21633	0.123712	0.0102711		0.586693	0.00902403	0.0123716
-78.092	150.233		-81.469	-171.87	0	121.342	28.284	0	1	0	0.00540015	359.998	1.94405	0.252003	11.9997	3.02397	0	371.998	0.166667	0	0
0.000	0.000		-80.482	-167.196	0	169.331	22.561	0	1	0	0.00603595	501	3.02402	0.158403	14.9997	2.376	0	515.999	0.119761	0	0		pause dur./GS duration		0.000770334	min/min
0.000	0.000		-81.301	-173.991	0	92.565	19.105	0	1	0	0.00550813	274.501	1.51198	0.342	6	2.052	0	280.501	0.218579	0	0		N pause / GS duration		0.0102711	event/min	0.0102711	by count	0.0102711	by count			0.0123716	by count
-76.608	107.935		-80.238	-172.875	-90	94.366	24.187	1	1	0	0.00619369	278.999	1.72803	0.288	9.00006	2.59202	3	287.999	0.215055	0	1.04167
-171.254	26.306		-78.232	-171.469	0	73.546	20.224	0	1	0	0.0074998	216.001	1.61996	0.239993	9.00036	2.16003	0	225.001	0.277777	0	0		Counting
-90.000	1.000		-79.276	-171.119	-90	134.347	32.388	1	1	0	0.00681788	396.002	2.6999	0.230391	15.0004	3.45597	3	411.002	0.151514	0	0.729923		Catastrophe	Rescue	Pause	N of kymos	Frames ?
-81.674	41.437		-83.991	-165.964	0	57.315	16.492	0	1	0	0.00378947	171	0.648	0.144002	11.9995	1.72796	0	183	0.350877	0	0		244	5	12		401
-167.005	13.342		-85.486	-171.87	0	38.118	14.142	0	1	0	0.00284211	113.999	0.323999	0.252003	5.99987	1.51199	0	119.999	0.526319	0	0
0.000	0.000		-81.027	-171.254	0	38.471	13.153	0	1	0	0.00568445	114.001	0.648031	0.234004	5.99991	1.40401	0	120	0.526313	0	0
-77.221	99.464		-77.471	-175.236	0	55.317	12.042	0	1	0	0.00800012	161.999	1.29601	0.431967	3.00033	1.29604	0	164.999	0.370372	0	0
-172.875	24.187		-80.293	-175.601	0	77.104	13.038	0	1	0	0.00615811	228	1.40405	0.467968	3.00011	1.40396	0	231	0.263158	0	0
0.000	0.000		-79.808	-168.69	0	90.427	30.594	0	1	0	0.00647223	267	1.72809	0.179999	18	3.23999	0	285	0.224719	0	0
-80.961	89.107		-82.763	-172.405	0	63.506	15.133	0	1	0	0.00457147	189	0.864011	0.269987	6.00038	1.62003	0	195.001	0.31746	0	0
-171.870	28.284		-80.327	-173.66	0	89.269	18.111	0	1	0	0.00613613	264	1.61994	0.32401	5.9999	1.94403	0	269.999	0.227273	0	0
0.000	0.000		-81.724	0	0	55.579	0	0	0	0	0.00523643	165.001	0.864015		0	0	0	165.001	0		0
-78.970	60.110		-83.884	-171.87	0	84.481	7.071	0	1	0	0.00385745	252	0.972081	0.252003	2.99993	0.755993	0	255	0.238095	0	0
-173.290	22.823		-80.655	-162.897	0	80.062	13.601	0	1	0	0.00592426	236.998	1.40404	0.116998	11.9998	1.40395	0	248.998	0.253166	0	0
0.000	0.000		-81.469	-167.005	0	60.671	13.342	0	1	0	0.00540015	179.999	0.972023	0.155995	9.00049	1.40403	0	189	0.333335	0	0
-83.320	37.253		-82.528	-172.648	0	123.045	31.257	0	1	0	0.00472159	366.001	1.72811	0.279014	11.9994	3.348	0	378	0.163934	0	0
-174.644	10.713		-80.998	-171.469	0	102.259	20.224	0	1	0	0.00570312	302.998	1.72804	0.239993	9.00036	2.16003	0	311.999	0.198021	0	0
0.000	0.333		-81.87	-169.695	0	42.426	11.18	0	1	0	0.00514279	125.999	0.647986	0.197997	5.99991	1.18796	0	131.999	0.476195	0	0
-82.983	43.660		-76.504	-170.538	0	77.13	18.248	0	1	0	0.00864017	225	1.94404	0.216007	8.99955	1.94397	0	234	0.266666	0	0
-168.690	6.799		-78.44	-169.695	0	89.822	22.361	0	1	0	0.00736354	264	1.94398	0.197997	12.0003	2.37603	0	276	0.227273	0	0
0.000	0.000		-76.891	-171.027	0	74.953	19.235	0	1	0	0.00838342	218.999	1.83596	0.22799	9.00019	2.05196	0	227.999	0.273974	0	0
-85.786	158.763		-76.759	-171.87	0	52.393	14.142	0	1	0	0.0084709	153	1.29605	0.252003	5.99987	1.51199	0	159	0.392156	0	0
-167.152	19.488		-84.806	-170.91	0	165.68	25.318	0	1	0	0.00327245	494.999	1.61986	0.225007	11.9996	2.7	0	506.999	0.121212	0	0
0.000	0.000		-80.134	-165.964	0	23.345	8.246	0	1	0	0.00626099	68.9993	0.432004	0.144002	5.99974	0.863979	0	74.999	0.869574	0	0
-80.779	78.008		-77.32	-171.027	0	41	19.235	0	1	0	0.00809974	120	0.971971	0.22799	9.00019	2.05196	0	129	0.499999	0	0
-171.870	14.142		-80.484	-170.538	0	175.414	42.579	1	1	0	0.00603466	519.001	3.132	0.216007	20.9991	4.53597	0	540	0.115607	0	0
0.000	0.000		-84.289	-170.538	0	30.15	12.166	0	1	0	0.00360025	90.001	0.324027	0.216007	6.00003	1.29605	0	96.0011	0.666659	0	0
-77.661	49.135		-76.43	-165.964	0	29.833	8.246	0	1	0	0.00868936	87.0005	0.75598	0.144002	5.99974	0.863979	0	93.0003	0.689651	0	0
-174.958	17.066		-78.212	-172.304	0	117.478	37.336	0	1	0	0.00751292	345.001	2.59197	0.266402	14.9998	3.99597	0	360.001	0.173912	0	0
0.000	0.000		-75.53	-174.806	0	32.016	11.045	0	1	0	0.00929012	93.0012	0.863993	0.396032	2.99965	1.18796	0	96.0009	0.645153	0	0
-76.083	58.209		-79.563	-167.905	0	38.639	14.318	0	1	0	0.00663126	113.999	0.755959	0.167996	9.00029	1.51202	0	122.999	0.52632	0	0
-164.055	14.560		-72.104	-172.333	-90	100.881	52.469	1	1	1	0.0116249	288	3.34797	0.267421	21.0005	5.61599	3	309	0.208333	2.85707	0.970873
0.000	0.000		-83.66	-170.538	0	36.222	18.248	0	1	0	0.00399987	108.001	0.431992	0.216007	8.99955	1.94397	0	117.001	0.555548	0	0
-81.469	121.342		-82.333	-172.235	0	104.938	22.204	0	1	0	0.00484627	312	1.51204	0.264005	8.99997	2.37604	0	321	0.192308	0	0
-171.870	28.284		-81.304	0	0	85.988	0	0	0	0	0.0055062	254.999	1.40407		0	0	0	254.999	0		0
0.000	0.000		-80.218	-170.838	0	117.712	31.401	0	1	0	0.00620663	348.002	2.15992	0.223208	14.9996	3.34804	0	363.001	0.172413	0	0
-80.482	169.331		-83.224	-174.56	0	101.71	21.095	0	1	0	0.00427744	302.999	1.29606	0.378023	5.99963	2.268	0	308.998	0.198021	0	0
-167.196	22.561		-81.298	0	0	99.141	0	0	0	0	0.00551005	293.999	1.61995		0	0	0	293.999	0		0
0.000	0.000		-84.369	-170.134	0	142.688	23.345	0	1	0	0.00354949	425.998	1.51208	0.206996	12.0001	2.48397	0	437.998	0.140846	0	0
-81.301	92.565		-82.235	0	0	133.222	0	0	0	0	0.00490898	396.001	1.94396		0	0	0	396.001	0		0
-173.991	19.105		-82.333	-170.538	0	52.469	12.166	0	1	0	0.00484627	156	0.756019	0.216007	6.00003	1.29605	0	162	0.384616	0	0
0.000	0.000		-75.579	-168.69	0	36.139	10.198	0	1	0	0.00925729	105.001	0.972025	0.179999	6.00001	1.08	0	111.001	0.571423	0	0
-80.238	94.366		-76.608	-172.875	0	64.761	16.125	0	1	0	0.00857109	189	1.61994	0.288	6.00017	1.72805	0	195	0.31746	0	0
-172.875	24.187		-75.964	-173.157	0	78.339	25.179	0	1	0	0.00899983	228	2.05196	0.29999	9.00017	2.69996	0	237	0.263158	0	0
-90.000	1.000		-80.134	-166.759	0	70.036	17.464	0	1	0	0.00626099	207.001	1.29603	0.152994	12.0003	1.83597	0	219.001	0.289854	0	0
-78.232	73.546		-83.29	-173.66	0	51.352	18.111	0	1	0	0.00423539	153.001	0.648019	0.32401	5.9999	1.94403	0	159.001	0.392155	0	0
-171.469	20.224		-79.974	-171.027	0	183.807	38.471	0	1	0	0.00636461	543	3.45599	0.22799	18.0009	4.10402	0	561.001	0.110497	0	0
0.000	0.000		-79.651	-173.157	0	116.902	25.179	0	1	0	0.00657411	345.001	2.26807	0.29999	9.00017	2.69996	0	354.001	0.173913	0	0
-79.276	134.347		-77.005	-176.186	0	26.683	15.033	0	1	0	0.00830794	77.9989	0.648011	0.54001	2.99988	1.61997	0	80.9988	0.769241	0	0
-171.119	32.388		-83.211	-169.695	0	42.297	11.18	0	1	0	0.00428573	126.001	0.540007	0.197997	5.99991	1.18796	0	132.001	0.476186	0	0
-90.000	1.000		-82.057	-171.87	0	43.417	14.142	0	1	0	0.00502295	129.001	0.647968	0.252003	5.99987	1.51199	0	135.001	0.465111	0	0
-83.991	57.315		-79.651	-171.254	0	116.902	26.306	0	1	0	0.00657411	345.001	2.26807	0.234004	11.9998	2.80801	0	357	0.173913	0	0
-165.964	16.492		-81.209	-173.418	0	98.153	26.173	0	1	0	0.0055673	291	1.62008	0.311997	9.00025	2.80805	0	300	0.206186	0	0
0.000	0.000		-80.972	-171.469	0	108.342	20.224	0	1	0	0.00571987	321	1.83608	0.239993	9.00036	2.16003	0	330	0.186916	0	0
-85.486	38.118		-81.781	-168.69	0	90.934	25.495	0	1	0	0.00519986	270	1.40396	0.179999	15	2.69999	0	285	0.222222	0	0
-171.870	14.142		-78.179	-165.964	0	87.864	20.616	0	1	0	0.00753456	258.002	1.94393	0.144002	15.0001	2.16005	0	273.002	0.232556	0	0
0.000	0.000		-78.69	-167.471	0	35.693	9.22	0	1	0	0.00720004	105	0.756002	0.161997	6.00039	0.972047	0	111	0.571431	0	0
-81.027	38.471		-81.87	-173.157	0	53.033	12.59	0	1	0	0.00514279	157.5	0.80999	0.29999	4.50026	1.35003	0	162	0.380952	0	0
-171.254	13.153		-80.218	-159.444	0	29.428	8.544	0	1	0	0.00620663	87.0005	0.53998	0.0960001	8.99998	0.864	0	96.0004	0.689651	0	0
0.000	0.000		-79.461	-169.778	0	131.214	30.992	0	1	0	0.00669755	387.002	2.59196	0.19964	16.4998	3.29401	0	403.501	0.155038	0	0
-77.471	55.317		-76.645	-173.66	0	142.864	36.222	0	1	0	0.00854653	417.002	3.56392	0.32401	11.9998	3.88805	0	429.002	0.143884	0	0
-175.236	12.042		-81.87	-174.289	0	35.355	10.05	0	1	0	0.00514279	104.999	0.539988	0.359974	3.00025	1.08001	0	107.999	0.571434	0	0
0.000	0.000		-76.464	-170.754	0	166.628	43.566	0	1	0	0.00866675	485.999	4.21204	0.221145	20.9997	4.644	0	506.998	0.123457	0	0
-80.293	77.104		-82.064	-171.027	0	166.595	38.471	0	1	0	0.00501846	494.999	2.48414	0.22799	18.0009	4.10402	0	512.999	0.121212	0	0
-175.601	13.038		-80.407	-165.964	0	72.007	20.616	0	1	0	0.00608441	213	1.29598	0.144002	15.0001	2.16005	0	228	0.28169	0	0
0.000	0.000		-80.91	-165.964	0	25.318	8.246	0	1	0	0.00575982	75.0001	0.431987	0.144002	5.99974	0.863979	0	80.9999	0.799999	0	0
-79.808	90.427		-80.696	-171.158	0	296.906	45.541	0	1	0	0.0058978	879	5.18417	0.231423	21.0003	4.85998	0	900	0.0682594	0	0
-168.690	30.594		-80.707	-176.186	0	111.463	30.067	0	1	0	0.0058907	330	1.94394	0.54001	5.99996	3.24004	0	336	0.181818	0	0
0.000	0.000		-77.471	-165.256	0	36.878	19.647	0	1	0	0.00800012	107.999	0.864009	0.136796	15.0005	2.05201	0	123	0.555559	0	0
-82.763	63.506		-75.816	0	0	187.723	0	0	0	0	0.0090987	546	4.96789		0	0	0	546	0		0
-172.405	15.133		-78.785	-176.055	0	118.258	29.069	0	1	0	0.00713798	347.999	2.48401	0.522024	5.99974	3.13201	0	353.999	0.172414	0	0
0.000	0.000		-75.964	-171.87	0	41.231	14.142	0	1	0	0.00899983	120	1.07998	0.252003	5.99987	1.51199	0	126	0.5	0	0
-80.327	89.269		-72.768	0	0	195.788	0	0	0	0	0.0111659	560.999	6.26406		0	0	0	560.999	0		0
-173.660	18.111		-80.412	-175.486	0	75.048	19.059	0	1	0	0.00608118	221.999	1.35002	0.455998	4.49998	2.05199	0	226.499	0.270272	0	0
0.000	0.000		-79.643	-170.049	0	147.402	28.935	0	1	0	0.00657931	435.001	2.86201	0.205192	15.0004	3.07797	0	450.001	0.137931	0	0
-81.724	55.579		-81.607	-173.66	0	61.66	31.694	0	1	0	0.00531152	182.999	0.972003	0.32401	10.4997	3.40202	0	193.499	0.327871	0	0
0.000	0.000		-80.747	-175.236	0	90.173	18.062	0	1	0	0.0058649	266.999	1.56592	0.431967	4.50024	1.94396	0	271.499	0.22472	0	0
0.000	0.000		-88.781	-171.87	0	47.011	7.071	0	1	0	0.000766035	141.001	0.108012	0.252003	2.99993	0.755993	0	144.001	0.425529	0	0
-83.884	84.481		-81.135	-175.914	0	110.318	14.036	0	1	0	0.00561492	327	1.83608	0.503952	3.00035	1.51203	0	330.001	0.183486	0	0
-171.870	7.071		-76.239	-167.905	0	50.448	28.636	0	1	1	0.00881646	147	1.29602	0.167996	18.0006	3.02404	0	165	0.408164	3.33323	0
0.000	0.000		-79.254	-172.405	0	139.445	30.265	0	1	0	0.0068322	410.999	2.80803	0.269987	12.0004	3.23994	0	422.999	0.145986	0	0
-80.655	80.062		-82.504	-171.87	0	38.328	10.607	0	1	0	0.00473693	114.001	0.540017	0.252003	4.50011	1.13404	0	118.501	0.52631	0	0
-162.897	13.601		-71.565	-172.405	0	14.23	7.566	0	1	0	0.012	40.4993	0.485993	0.269987	2.99999	0.809959	0	43.4993	1.48151	0	0
0.000	0.000		-83.746	-173.29	0	36.719	8.559	0	1	0	0.00394518	109.501	0.432003	0.305992	3.00021	0.91804	0	112.502	0.547938	0	0
-81.469	60.671		-78.341	-169.992	0	32.164	8.631	0	1	0	0.00742837	94.5011	0.70199	0.203999	4.49983	0.917964	0	99.001	0.634913	0	0
-167.005	13.342		-78.903	0	0	184.449	0	0	0	0	0.00706095	543.001	3.83411		0	0	0	543.001	0		0
0.000	0.000		-79.992	-171.254	0	17.263	13.153	0	1	0	0.00635295	51.001	0.324007	0.234004	5.99991	1.40401	0	57.0009	1.17645	0	0
-82.528	123.045		-76.409	-171.469	0	93.622	30.336	0	1	0	0.00870332	273.001	2.37602	0.239993	13.5005	3.24004	0	286.502	0.219779	0	0
-172.648	31.257		-81.501	-170.074	0	87.966	20.304	0	1	0	0.00537959	261	1.40407	0.205719	10.4998	2.16001	0	271.5	0.229885	0	0
0.000	0.000		-78.996	-170.395	0	36.674	32.962	0	1	0	0.00700029	107.999	0.756026	0.212732	16.4996	3.50999	0	124.499	0.55556	0	0
-80.998	102.259		-81.338	-170.91	0	129.477	25.318	0	1	0	0.00548434	384.001	2.10599	0.225007	11.9996	2.7	0	396	0.15625	0	0
-171.469	20.224		-81.87	-169.38	0	70.711	32.558	0	1	0	0.00514279	210.001	1.07999	0.191993	18.0008	3.45603	0	228.002	0.285713	0	0
0.000	0.000		-83.66	-168.69	0	18.111	10.198	0	1	0	0.00399987	54.0007	0.215996	0.179999	6.00001	1.08	0	60.0007	1.1111	0	0
-81.870	42.426		-79.155	-170.181	0	265.746	52.773	0	1	1	0.00689667	782.999	5.40009	0.208006	26.9991	5.61599	0	809.998	0.0766284	2.22229	0
-169.695	11.180		-83.157	-173.157	0	12.59	12.59	0	1	0	0.00432014	37.5009	0.162009	0.29999	4.50026	1.35003	0	42.0012	1.59996	0	0
0.000	0.000		-82.513	-173.83	0	88.252	18.608	0	1	0	0.00473118	262.499	1.24193	0.333009	5.9999	1.99802	0	268.499	0.228572	0	0
-76.504	77.130		-83.83	-170.134	0	55.823	11.673	0	1	0	0.00389178	166.499	0.647977	0.206996	6.00031	1.24204	0	172.499	0.360363	0	0
-170.538	18.248		-83.66	-170.218	0	36.222	14.714	0	1	0	0.00399987	108.001	0.431992	0.208809	7.49972	1.56601	0	115.501	0.555548	0	0
0.000	0.000		-84.883	-176.186	0	33.634	7.517	0	1	0	0.00322368	100.5	0.32398	0.54001	1.50004	0.810038	0	102	0.597016	0	0
-78.440	89.822		-82.476	-171.254	0	26.73	6.576	0	1	0	0.00475483	79.4996	0.378007	0.234004	2.99973	0.70195	0	82.4993	0.754721	0	0
-169.695	22.361		-80.91	-174.898	0	88.613	28.111	0	1	0	0.00575982	262.5	1.51196	0.403213	7.49965	3.02396	0	270	0.228571	0	0
0.000	0.000		-78.875	-170.69	0	121.789	30.907	0	1	0	0.00707923	358.501	2.53791	0.219598	15	3.29399	0	373.501	0.167363	0	0
-76.891	74.953		-80.538	-173.29	0	12.166	17.117	0	1	0	0.00599979	36.0014	0.216001	0.305992	6.00006	1.83597	0	42.0015	1.6666	0	0
-171.027	19.235		-79.186	-169.509	0	90.609	27.459	0	1	0	0.00687648	267	1.83602	0.194409	14.9993	2.916	0	281.999	0.224719	0	0
0.000	0.000		-79.808	-168.69	0	90.427	20.396	0	1	0	0.00647223	267	1.72809	0.179999	12	2.15999	0	279	0.224719	0	0
-76.759	52.393		-77.525	0	0	115.732	0	0	0	0	0.00796452	338.999	2.69997		0	0	0	338.999	0		0
-171.870	14.142		-82.073	-172.569	0	39.881	11.597	0	1	0	0.0050127	118.5	0.594004	0.276015	4.49959	1.24196	0	122.999	0.50633	0	0
0.000	0.000		-78.864	-168.69	0	129.437	33.144	0	1	0	0.00708641	381	2.69992	0.179999	19.5003	3.51004	0	400.5	0.15748	0	0
-84.806	165.680		-82.476	-170.838	0	106.921	31.401	0	1	0	0.00475483	318.001	1.51204	0.223208	14.9996	3.34804	0	333.001	0.188678	0	0
-170.910	25.318		-70.974	-166.866	0	61.351	30.806	0	1	0	0.0124141	173.998	2.16003	0.154286	21.0001	3.24002	0	194.998	0.344831	0	0
0.000	0.000		-83.047	-172.147	0	82.608	29.275	0	1	0	0.00439027	246.001	1.08001	0.26101	11.9997	3.13205	0	258.001	0.243901	0	0
-80.134	23.345		-81.119	-167.093	0	129.553	49.244	0	1	0	0.00562521	383.999	2.16008	0.157096	32.9988	5.18398	0	416.998	0.15625	0	0
-165.964	8.246		-85.236	-170.538	0	72.25	18.248	0	1	0	0.00300022	216.001	0.648053	0.216007	8.99955	1.94397	0	225.001	0.277776	0	0
0.000	0.000		-80.482	-172.875	0	169.331	24.187	0	1	0	0.00603595	501	3.02402	0.288	9.00006	2.59202	0	510	0.119761	0	0
-77.320	41.000		-81.87	-175.236	0	21.213	12.042	0	1	0	0.00514279	62.9994	0.323993	0.431967	3.00033	1.29604	0	65.9997	0.95239	0	0
-171.027	19.235		-80.538	-167.005	0	42.579	13.342	0	1	0	0.00599979	125.999	0.755968	0.155995	9.00049	1.40403	0	135	0.476194	0	0
0.000	0.000		-78.899	-163.301	0	161.012	31.321	0	1	0	0.00706356	473.998	3.34812	0.120002	26.9997	3.24001	0	500.998	0.126583	0	0
-80.484	175.414		-83.29	-167.905	-90	34.234	14.318	2	1	0	0.00423539	101.999	0.432004	0.167996	9.00029	1.51202	6	110.999	0.588244	0	5.40546
-170.538	42.579		-80.369	-167.276	0	167.359	31.78	0	1	0	0.00610898	495.001	3.02395	0.159433	20.9991	3.34795	0	516	0.121212	0	0
0.000	1.000		-80.538	-170.538	0	42.579	12.166	0	1	0	0.00599979	125.999	0.755968	0.216007	6.00003	1.29605	0	131.999	0.476194	0	0
-84.289	30.150		-78.024	-176.634	0	67.469	17.029	0	1	0	0.00763627	198.002	1.51199	0.612083	2.99952	1.83596	0	201.001	0.303028	0	0
-170.538	12.166		-75.964	-173.29	0	49.477	17.117	0	1	0	0.00899983	143.999	1.29597	0.305992	6.00006	1.83597	0	149.999	0.416668	0	0
0.000	0.000		-79.509	-173.66	0	54.918	18.111	0	1	0	0.00666635	162	1.07995	0.32401	5.9999	1.94403	0	168	0.370371	0	0
-76.430	29.833		-83.211	-175.236	0	42.297	12.042	0	1	0	0.00428573	126.001	0.540007	0.431967	3.00033	1.29604	0	129.002	0.476186	0	0
-165.964	8.246		-83.766	-173.66	0	119.708	18.111	0	1	0	0.00393246	357	1.40389	0.32401	5.9999	1.94403	0	363	0.168067	0	0
0.000	0.000		-84.958	-172.405	0	68.264	15.133	0	1	0	0.00317618	204	0.64794	0.269987	6.00038	1.62003	0	210	0.294118	0	0
-78.212	117.478		-83.408	0	0	226.497	0	0	0	0	0.00416024	674.999	2.80816		0	0	0	674.999	0		0
-172.304	37.336		-84.857	-174.472	0	100.404	31.145	0	1	0	0.00324015	299.999	0.972043	0.371968	9.0008	3.34802	0	309	0.2	0	0
0.000	0.000		-82.542	-171.158	0	277.346	45.541	0	1	0	0.00471264	824.999	3.88793	0.231423	21.0003	4.85998	0	846	0.0727273	0	0
-75.530	32.016		-81.027	-172.235	0	38.471	22.204	0	1	0	0.00568445	114.001	0.648031	0.264005	8.99997	2.37604	0	123.001	0.526313	0	0
-174.806	11.045		-78.425	-170.311	0	169.446	41.593	0	1	0	0.00737336	498	3.67194	0.210852	21.0003	4.42797	0	519	0.120482	0	0
0.000	0.000		-80.367	-174.289	0	73.706	16.75	0	1	0	0.00611027	218	1.33204	0.359974	5.00042	1.80002	0	223.001	0.275229	0	0
-79.563	38.639		-82.972	-168.341	0	98.07	21.442	0	1	0	0.0044381	291.999	1.29592	0.174466	12.9994	2.26796	0	304.999	0.20548	0	0
-167.905	14.318		-82.988	-172.648	0	94.205	15.628	0	1	0	0.00442789	280.501	1.24203	0.279014	5.9995	1.67395	0	286.501	0.213903	0	0
0.000	0.000		-81.327	-172.875	0	119.365	20.156	0	1	0	0.00549141	354	1.94396	0.288	7.50012	2.16004	0	361.5	0.169491	0	0
-72.104	100.881		-79.546	-172.349	0	137.787	33.801	0	1	0	0.00664231	406.5	2.7001	0.267987	13.5007	3.61801	0	420	0.147602	0	0
-172.333	52.469		-84.094	-170.538	0	43.732	9.124	0	1	0	0.00372404	130.5	0.485987	0.216007	4.49978	0.971986	0	134.999	0.459771	0	0
-90.000	1.000		-74.407	-168.232	0	44.643	12.258	0	1	0	0.0100466	129	1.29601	0.172804	7.50003	1.29604	0	136.5	0.465117	0	0
-83.660	36.222		-85.03	-170.538	0	46.174	18.248	0	1	0	0.0031306	138.001	0.432026	0.216007	8.99955	1.94397	0	147.001	0.434779	0	0
-170.538	18.248		-82.875	-165.964	0	16.125	8.246	0	1	0	0.00449999	48.0014	0.216006	0.144002	5.99974	0.863979	0	54.0012	1.24996	0	0
0.000	0.000		-84.806	-167.471	0	55.227	9.22	0	1	0	0.00327245	165.001	0.539957	0.161997	6.00039	0.972047	0	171.001	0.363635	0	0
-82.333	104.938		-84.289	-164.055	0	40.2	7.28	0	1	0	0.00360025	120.001	0.432036	0.126003	5.99976	0.75599	0	126.001	0.499994	0	0
-172.235	22.204		-83.593	-171.87	0	188.175	35.355	0	1	0	0.0040425	560.999	2.26784	0.252003	14.9997	3.77996	0	575.999	0.106952	0	0
0.000	0.000		-83.056	-174.806	0	157.153	33.136	0	1	0	0.00438453	468.001	2.05196	0.396032	8.99924	3.56399	0	477	0.128205	0	0
-81.304	85.988		-76.608	-169.046	0	64.761	31.575	0	1	0	0.00857109	189	1.61994	0.186001	17.9997	3.34797	0	207	0.31746	0	0
0.000	0.000		-79.756	-169.216	0	84.345	21.378	1	1	0	0.00650596	249.001	1.62	0.189005	11.9999	2.26805	0	261.001	0.240962	0	0
0.000	0.000		-75.256	-168.69	0	19.647	10.198	0	1	0	0.00947397	57.0002	0.540019	0.179999	6.00001	1.08	0	63.0002	1.05263	0	0
-80.218	117.712		-82.504	-173.66	0	76.655	18.111	0	1	0	0.00473693	228	1.08002	0.32401	5.9999	1.94403	0	234	0.263158	0	0
-170.838	31.401		-77.005	-164.745	0	26.683	11.402	0	1	0	0.00830794	77.9989	0.648011	0.132001	9.00013	1.18803	0	86.999	0.769241	0	0
0.000	0.000		-81.87	0	0	63.64	0	0	0	0	0.00514279	189.001	0.971994		0	0	0	189.001	0		0
-83.224	101.710		-78.48	-172.093	0	160.228	36.346	0	1	0	0.00733736	471.001	3.45591	0.259205	14.9999	3.88805	0	486.001	0.127388	0	0
-174.560	21.095		-83.601	-167.196	0	107.671	22.561	0	1	0	0.00403741	321.001	1.29601	0.158403	14.9997	2.376	0	336	0.186916	0	0
0.000	0.000		-79.509	-173.66	0	164.754	36.222	0	1	0	0.00666635	486	3.23985	0.32401	11.9998	3.88805	0	497.999	0.123457	0	0
-81.298	99.141		-83.089	-170.538	0	33.242	12.166	0	1	0	0.00436349	99.0014	0.431992	0.216007	6.00003	1.29605	0	105.001	0.606052	0	0
0.000	0.000		-85.03	-171.254	0	23.087	13.153	0	1	0	0.0031306	69.0006	0.216013	0.234004	5.99991	1.40401	0	75.0005	0.869558	0	0
0.000	0.000		-80.538	-165.964	0	30.414	8.246	0	1	0	0.00599979	90.0006	0.539985	0.144002	5.99974	0.863979	0	96.0004	0.666662	0	0
-84.369	142.688		-80.41	-169.695	90	222.104	44.721	2	1	0	0.00608248	657	3.99619	0.197997	24.0002	4.75196	6	681.001	0.0913241	0	0.881057
-170.134	23.345		-76.779	-172.235	90	170.52	44.407	3	1	0	0.00845764	498.001	4.21192	0.264005	17.9995	4.75198	9	516.001	0.120482	0	1.74418
0.000	0.000		-83.112	-171.573	0	150.083	27.295	0	1	0	0.00434882	446.999	1.94392	0.242999	12.0002	2.91603	0	459	0.134228	0	0
-82.235	133.222		-78.69	-167.471	0	20.396	9.22	0	1	0	0.00720004	59.9998	0.432001	0.161997	6.00039	0.972047	0	66.0001	1	0	0
0.000	0.000		-82.875	-165.964	0	40.311	12.369	0	1	0	0.00449999	119.999	0.539995	0.144002	8.99962	1.29597	0	128.999	0.500004	0	0
0.000	0.000		-82.196	-171.87	0	99.421	17.678	0	1	0	0.00493394	295.501	1.45798	0.252003	7.50005	1.89004	0	303.001	0.203045	0	0
-82.333	52.469		-77.029	-173.118	0	91.33	29.21	0	1	0	0.00829206	266.999	2.21397	0.298273	10.5003	3.13195	0	277.499	0.22472	0	0
-170.538	12.166		-78.408	-174.094	0	119.436	29.155	0	1	0	0.00738449	351	2.59196	0.348008	8.99986	3.13203	0	360	0.17094	0	0
0.000	0.000		-83.157	-163.301	0	25.179	10.44	0	1	0	0.00432014	74.9989	0.324006	0.120002	8.99961	1.07997	0	83.9985	0.800012	0	0
-75.579	36.139		-77.518	-171.87	0	134.172	35.355	0	1	0	0.00796914	393.002	3.13189	0.252003	14.9997	3.77996	0	408.002	0.152671	0	0
-168.690	10.198		-86.424	-165.964	0	16.031	8.246	0	1	0	0.00224979	47.9994	0.107988	0.144002	5.99974	0.863979	0	53.9991	1.25002	0	0
0.000	0.000		-77.51	-173.737	0	53.943	27.497	0	1	0	0.00797441	157.999	1.25995	0.328026	8.99914	2.95195	0	166.998	0.379749	0	0
-76.608	64.761		-82.349	-170.91	0	22.534	8.439	0	1	0	0.00483604	67.0002	0.324016	0.225007	3.99972	0.899966	0	70.9999	0.89552	0	0
-172.875	16.125		-78.69	-170.91	90	69.687	16.879	2	1	0	0.00720004	205.001	1.47602	0.225007	7.99992	1.80004	6	213.001	0.292681	0	2.81689
0.000	0.000		-81.87	-174.144	0	40.069	13.068	0	1	0	0.00514279	118.999	0.611986	0.351	3.99993	1.40398	0	122.999	0.504206	0	0
-75.964	78.339		-80.618	-168.408	90	38.853	13.271	1	1	0	0.00594814	115	0.684035	0.175503	8.00007	1.40403	3	123	0.52174	0	2.43903
-173.157	25.179		-85.657	-171.87	0	26.409	9.428	0	1	0	0.00273402	78.9995	0.215987	0.252003	3.99991	1.00799	0	82.9994	0.759498	0	0
0.000	0.000		-78.95	-169.216	0	158.267	35.629	0	1	0	0.00703029	465.998	3.27611	0.189005	19.9993	3.77998	0	485.998	0.128756	0	0
-80.134	70.036		-82.349	-174.094	0	33.801	14.577	0	1	0	0.00483604	100.5	0.486024	0.348008	4.49978	1.56596	0	105	0.597013	0	0
-166.759	17.464		-76.558	-170.538	0	187.126	48.662	0	1	0	0.00860429	545.999	4.69794	0.216007	23.9991	5.18399	0	569.999	0.10989	0	0
0.000	0.000		-80.41	0	0	111.052	0	0	0	0	0.00608248	328.5	1.9981		0	0	0	328.5	0		0
-83.290	51.352		-80.011	-170.665	0	178.709	36.99	0	1	0	0.00634064	528	3.34786	0.219	18.0001	3.94201	0	546	0.113636	0	0
-173.660	18.111		-79.114	-171.254	0	26.476	13.153	0	1	0	0.00692338	77.9987	0.540015	0.234004	5.99991	1.40401	0	83.9986	0.769244	0	0
0.000	0.000		-79.695	-166.759	0	33.541	17.464	0	1	0	0.00654555	98.9999	0.648009	0.152994	12.0003	1.83597	0	111	0.606061	0	0
-79.974	183.807		-83.228	-171.87	0	161.124	28.284	0	1	0	0.00427489	480	2.05195	0.252003	11.9997	3.02397	0	491.999	0.125	0	0
-171.027	38.471		-78.04	-166.409	0	103.752	46.811	0	1	0	0.00762576	304.499	2.32204	0.148908	33.0003	4.91402	0	337.5	0.197045	0	0
0.000	0.000		-78.584	-168.906	0	106.099	25.986	0	1	0	0.00726933	312	2.26803	0.183595	15.0006	2.75404	0	327	0.192308	0	0
-79.651	116.902		-81.355	-176.424	0	86.483	16.031	0	1	0	0.00547341	256.501	1.40394	0.576053	2.99968	1.72798	0	259.501	0.233917	0	0
-173.157	25.179		-82.015	-173.774	0	111.582	27.663	0	1	0	0.00504985	331.5	1.67403	0.329991	9.0002	2.96998	0	340.501	0.180995	0	0
0.000	0.000		-78.823	-174.71	90	126.397	27.115	2	1	0	0.00711317	371.999	2.64609	0.388806	7.49975	2.91595	6	379.499	0.161291	0	1.58103
-77.005	26.683		-79.721	0	0	98.074	0	0	0	0	0.00652867	289.5	1.89005		0	0	0	289.5	0		0
-176.186	15.033		-79.624	-174.806	0	72.18	33.136	0	1	0	0.00659164	212.999	1.40401	0.396032	8.99924	3.56399	0	221.998	0.281692	0	0
0.000	0.000		-83.66	-165.964	0	22.638	8.246	0	1	0	0.00399987	67.4986	0.269986	0.144002	5.99974	0.863979	0	73.4984	0.888907	0	0
-83.211	42.297		-78.983	-169.695	0	57.561	16.771	0	1	0	0.00700877	169.501	1.18799	0.197997	9.0004	1.78205	0	178.501	0.353981	0	0
-169.695	11.180		-82.576	-172.614	0	166.395	27.226	0	1	0	0.00469091	495	2.32201	0.277716	10.5	2.91601	0	505.5	0.121212	0	0
0.000	0.000		-80.827	-169.919	0	178.786	45.706	0	1	0	0.00581331	529.499	3.07815	0.202492	24.0012	4.86004	0	553.5	0.113315	0	0
-82.057	43.417		-81.076	-165.466	0	61.241	13.946	0	1	0	0.00565289	181.499	1.026	0.138862	10.4994	1.45797	0	191.998	0.33058	0	0
-171.870	14.142		-83.558	-158.962	0	93.591	13.928	0	1	0	0.00406477	279	1.13407	0.0935975	14.9999	1.40396	0	294	0.215054	0	0
0.000	0.000		-80.074	-173.66	0	40.608	27.166	0	1	0	0.00629983	120	0.755984	0.32401	8.99968	2.91598	0	129	0.499998	0	0
-79.651	116.902		-78.215	-164.745	0	141.993	34.205	0	1	0	0.00751095	417	3.13207	0.132001	26.9996	3.56397	0	443.999	0.143885	0	0
-171.254	26.306		-79.76	0	0	157.509	0	0	0	0	0.00650337	465	3.02407		0	0	0	465	0		0
0.000	0.000		-82.333	-172.405	0	52.469	15.133	0	1	0	0.00484627	156	0.756019	0.269987	6.00038	1.62003	0	162	0.384616	0	0
-81.209	98.153		-87.138	-167.471	0	20.025	9.22	0	1	0	0.00179974	60.0001	0.107985	0.161997	6.00039	0.972047	0	66.0005	0.999999	0	0
-173.418	26.173		-77.609	0	0	270.296	0	0	0	0	0.00790918	791.999	6.26407		0	0	0	791.999	0		0
0.000	0.000		-80.87	-175.03	0	113.437	23.087	0	1	0	0.00578559	336	1.94396	0.413978	6.00037	2.48402	0	342	0.178572	0	0
-80.972	108.342		-79.695	-176.634	90	55.902	17.029	1	1	0	0.00654555	165.001	1.08002	0.612083	2.99952	1.83596	3	168	0.363635	0	1.78571
-171.469	20.224		-83.13	-173.66	0	83.6	18.111	0	1	0	0.00433735	248.999	1.08	0.32401	5.9999	1.94403	0	254.999	0.240965	0	0
0.000	0.000		-84.987	-173.29	0	57.219	17.117	0	1	0	0.00315782	171	0.539989	0.305992	6.00006	1.83597	0	177	0.350876	0	0
-81.781	90.934		-78.93	-165.069	0	46.872	15.524	0	1	0	0.00704334	138	0.971979	0.135004	11.9995	1.61998	0	149.999	0.434784	0	0
-168.690	25.495		-87.614	-171.254	0	48.042	13.153	1	1	0	0.00150003	144.001	0.216007	0.234004	5.99991	1.40401	0	150.001	0.416664	0	0
0.000	0.000		-79.287	-175.236	0	112.969	24.083	0	1	0	0.00681072	333	2.26797	0.431967	6.0004	2.59198	0	339	0.18018	0	0
-78.179	87.864		-79.875	-165.964	0	28.443	8.246	0	1	0	0.00642878	84.0001	0.540019	0.144002	5.99974	0.863979	0	89.9999	0.714285	0	0
-165.964	20.616		-80.595	0	0	165.221	0	0	0	0	0.00596298	489	2.9159		0	0	0	489	0		0
0.000	0.000		-82.967	-170.134	0	155.168	23.345	0	1	0	0.00444129	462.001	2.05188	0.206996	12.0001	2.48397	0	474.002	0.12987	0	0
-78.690	35.693		-79.439	-168.69	0	60.017	15.297	0	1	0	0.00671185	177.001	1.18801	0.179999	9.00002	1.61999	0	186.001	0.338981	0	0
-167.471	9.220		-83.191	-172.875	0	67.476	16.125	0	1	0	0.00429847	201	0.863995	0.288	6.00017	1.72805	0	207	0.298507	0	0
0.000	0.000		-80.362	0	0	161.276	0	0	0	0	0.0061135	476.999	2.91614		0	0	0	476.999	0		0
-81.870	53.033		-81.973	-171.529	0	78.772	23.759	0	1	0	0.00507677	234.001	1.18797	0.241718	10.4997	2.53798	0	244.5	0.25641	0	0
-173.157	12.590		-81.906	-170.538	0	113.632	24.331	0	1	0	0.00511971	337.5	1.7279	0.216007	11.9996	2.592	0	349.5	0.177778	0	0
0.000	0.000		-81.87	-168.93	0	95.459	23.436	0	1	0	0.00514279	283.499	1.45798	0.184003	13.4997	2.48399	0	296.999	0.211641	0	0
-80.218	29.428		-84.726	-169.509	0	32.638	13.73	0	1	0	0.00332314	97.4995	0.324005	0.194409	7.49992	1.45805	0	104.999	0.615388	0	0
-159.444	8.544		-83.758	-166.759	0	64.382	8.732	0	1	0	0.00393755	192.001	0.756014	0.152994	6.00013	0.917985	0	198.001	0.312498	0	0
0.000	0.000		-79.405	-173.418	90	70.705	26.173	1	1	0	0.00673396	208.499	1.40402	0.311997	9.00025	2.80805	3	217.499	0.287772	0	1.37932
-79.461	131.214		-78.857	-165.964	0	33.634	10.308	0	1	0	0.00709097	98.9998	0.702006	0.144002	7.50004	1.08003	0	106.5	0.606062	0	0
-169.778	30.992		-78.69	-174.806	0	38.243	11.045	0	1	0	0.00720004	112.501	0.810012	0.396032	2.99965	1.18796	0	115.501	0.533329	0	0
0.000	0.000		-81.518	-174.289	0	115.261	20.1	0	1	0	0.00536867	342.001	1.83609	0.359974	6.0005	2.16003	0	348.001	0.175438	0	0
-76.645	142.864		-81.314	-177.138	0	72.835	20.025	0	1	0	0.00549977	215.999	1.18794	0.720101	2.99958	2.16	0	218.999	0.277779	0	0
-173.660	36.222		-77.856	-171.254	0	80.808	26.306	0	1	0	0.00774664	236.999	1.83595	0.234004	11.9998	2.80801	0	248.999	0.253166	0	0
0.000	0.000		-78.566	-167.471	0	181.604	36.878	0	1	0	0.0072811	534	3.88811	0.161997	24.0002	3.88798	0	558	0.11236	0	0
-81.870	35.355		-80.538	0	0	48.662	0	0	0	0	0.00599979	144	0.863969		0	0	0	144	0		0
-174.289	10.050		-84.134	-172.405	0	146.769	30.265	0	1	0	0.00369864	438.001	1.62001	0.269987	12.0004	3.23994	0	450.002	0.136986	0	0
0.000	0.000		-81.529	-172.405	0	47.518	15.133	0	1	0	0.0053616	140.999	0.755981	0.269987	6.00038	1.62003	0	146.999	0.425535	0	0
-76.464	166.628		-76.419	-173.517	0	183.12	44.283	0	1	0	0.00869667	533.999	4.64402	0.316803	14.9998	4.75198	0	548.999	0.11236	0	0
-170.754	43.566		-83.701	-171.87	0	77.468	21.213	0	1	0	0.0039738	231.001	0.917952	0.252003	8.9998	2.26798	0	240.001	0.259739	0	0
0.000	0.000		-83.346	-175.426	0	30.203	12.54	0.5	1	0	0.00419973	89.9987	0.37797	0.449992	3.00007	1.35001	0	92.9987	0.666677	0	0
-82.064	166.595		-79.354	-170.838	0	67.665	15.7	0	1	0	0.00676713	199.501	1.35005	0.223208	7.49957	1.67397	0	207	0.30075	0	0
-171.027	38.471		-77.963	-172.875	0	69.529	24.187	0	1	0	0.00767633	204.001	1.56598	0.288	9.00006	2.59202	0	213.001	0.294116	0	0
0.000	0.000		-77.437	-171.254	0	183.903	46.035	0	1	0	0.00802254	538.5	4.32014	0.234004	20.9995	4.91397	0	559.499	0.111421	0	0
-80.407	72.007		-83.395	-176.424	0	95.635	16.031	0	1	0	0.00416852	285.001	1.18803	0.576053	2.99968	1.72798	0	288	0.210526	0	0
-165.964	20.616		-81.557	-172.235	0	129.402	22.204	0	1	0	0.00534362	383.999	2.05195	0.264005	8.99997	2.37604	0	392.999	0.15625	0	0
0.000	0.000		-77.905	-165.069	0	42.953	15.524	0	1	0	0.00771444	125.999	0.972009	0.135004	11.9995	1.61998	0	137.998	0.476196	0	0
-80.910	25.318		-81.158	-165.964	0	45.541	16.492	0	1	0	0.00560011	134.999	0.756013	0.144002	11.9995	1.72796	0	146.999	0.444447	0	0
-165.964	8.246		-81.085	-173.29	0	51.624	17.117	0	1	0	0.0056471	153.001	0.864013	0.305992	6.00006	1.83597	0	159.001	0.392154	0	0
0.000	0.000		-77.32	0	0	205	0	0	0	0	0.00809974	600.001	4.85986		0	0	0	600.001	0		0
-80.696	296.906		-82.131	-162.525	0	248.338	56.613	0	2	1	0.00497556	737.999	3.67196	0.114351	51.0009	5.83202	0	789	0.162602	1.17645	0
-171.158	45.541
0.000	0.000
-80.707	111.463
-176.186	30.067
0.000	0.000
-77.471	36.878
-165.256	19.647
0.000	0.000
-75.816	187.723
0.000	0.000
0.000	0.000
-78.785	118.258
-176.055	29.069
0.000	0.000
-75.964	41.231
-171.870	14.142
0.000	0.000
-72.768	195.788
0.000	0.000
0.000	0.000
-80.412	75.048
-175.486	19.059
0.000	0.000
-79.643	147.402
-170.049	28.935
0.000	0.000
-81.607	61.660
-173.660	31.694
0.000	0.000
-80.747	90.173
-175.236	18.062
0.000	0.000
-88.781	47.011
-171.870	7.071
0.000	0.000
-81.135	110.318
-175.914	14.036
0.000	0.000
-76.239	50.448
-167.905	28.636
0.000	0.000
-79.254	139.445
-172.405	30.265
0.000	0.000
-82.504	38.328
-171.870	10.607
0.000	0.000
-71.565	14.230
-172.405	7.566
0.000	0.000
-83.746	36.719
-173.290	8.559
0.000	0.000
-78.341	32.164
-169.992	8.631
0.000	0.000
-78.903	184.449
0.000	0.000
0.000	0.000
-79.992	17.263
-171.254	13.153
0.000	0.000
-76.409	93.622
-171.469	30.336
0.000	0.000
-81.501	87.966
-170.074	20.304
0.000	0.000
-78.996	36.674
-170.395	32.962
0.000	0.000
-81.338	129.477
-170.910	25.318
0.000	0.000
-81.870	70.711
-169.380	32.558
0.000	0.000
-83.660	18.111
-168.690	10.198
0.000	0.000
-79.155	265.746
-170.181	52.773
0.000	0.000
-83.157	12.590
-173.157	12.590
0.000	0.000
-82.513	88.252
-173.830	18.608
0.000	0.000
-83.830	55.823
-170.134	11.673
0.000	0.000
-83.660	36.222
-170.218	14.714
0.000	0.000
-84.883	33.634
-176.186	7.517
0.000	0.000
-82.476	26.730
-171.254	6.576
0.000	0.000
-80.910	88.613
-174.898	28.111
0.000	0.000
-78.875	121.789
-170.690	30.907
0.000	0.000
-80.538	12.166
-173.290	17.117
0.000	0.000
-79.186	90.609
-169.509	27.459
0.000	0.000
-79.808	90.427
-168.690	20.396
0.000	0.000
-77.525	115.732
0.000	0.000
0.000	0.000
-82.073	39.881
-172.569	11.597
0.000	0.000
-78.864	129.437
-168.690	33.144
0.000	0.000
-82.476	106.921
-170.838	31.401
0.000	0.000
-70.974	61.351
-166.866	30.806
0.000	0.000
-83.047	82.608
-172.147	29.275
0.000	0.000
-81.119	129.553
-167.093	49.244
0.000	0.000
-85.236	72.250
-170.538	18.248
0.000	0.000
-80.482	169.331
-172.875	24.187
0.000	0.000
-81.870	21.213
-175.236	12.042
0.000	0.000
-80.538	42.579
-167.005	13.342
0.000	0.000
-78.899	161.012
-163.301	31.321
0.000	0.000
-83.290	34.234
-167.905	14.318
-90.000	2.000
-80.369	167.359
-167.276	31.780
0.000	0.000
-80.538	42.579
-170.538	12.166
0.000	0.000
-78.024	67.469
-176.634	17.029
0.000	0.000
-75.964	49.477
-173.290	17.117
0.000	0.000
-79.509	54.918
-173.660	18.111
0.000	0.000
-83.211	42.297
-175.236	12.042
0.000	0.000
-83.766	119.708
-173.660	18.111
0.000	0.000
-84.958	68.264
-172.405	15.133
0.000	0.000
-83.408	226.497
0.000	0.000
0.000	0.000
-84.857	100.404
-174.472	31.145
0.000	0.000
-82.542	277.346
-171.158	45.541
0.000	0.000
-81.027	38.471
-172.235	22.204
0.000	0.000
-78.425	169.446
-170.311	41.593
0.000	0.000
-80.367	73.706
-174.289	16.750
0.000	0.000
-82.972	98.070
-168.341	21.442
0.000	0.000
-82.988	94.205
-172.648	15.628
0.000	0.000
-81.327	119.365
-172.875	20.156
0.000	0.000
-79.546	137.787
-172.349	33.801
0.000	0.000
-84.094	43.732
-170.538	9.124
0.000	0.000
-74.407	44.643
-168.232	12.258
0.000	0.000
-85.030	46.174
-170.538	18.248
0.000	0.000
-82.875	16.125
-165.964	8.246
0.000	0.000
-84.806	55.227
-167.471	9.220
0.000	0.000
-84.289	40.200
-164.055	7.280
0.000	0.000
-83.593	188.175
-171.870	35.355
0.000	0.000
-83.056	157.153
-174.806	33.136
0.000	0.000
-76.608	64.761
-169.046	31.575
0.000	0.000
-79.756	84.345
-169.216	21.378
0.000	1.000
-75.256	19.647
-168.690	10.198
0.000	0.000
-82.504	76.655
-173.660	18.111
0.000	0.000
-77.005	26.683
-164.745	11.402
0.000	0.000
-81.870	63.640
0.000	0.000
0.000	0.000
-78.480	160.228
-172.093	36.346
0.000	0.000
-83.601	107.671
-167.196	22.561
0.000	0.000
-79.509	164.754
-173.660	36.222
0.000	0.000
-83.089	33.242
-170.538	12.166
0.000	0.000
-85.030	23.087
-171.254	13.153
0.000	0.000
-80.538	30.414
-165.964	8.246
0.000	0.000
-80.410	222.104
-169.695	44.721
45.000	1.414
-76.779	170.520
-172.235	44.407
18.435	3.162
-83.112	150.083
-171.573	27.295
0.000	0.000
-78.690	20.396
-167.471	9.220
0.000	0.000
-82.875	40.311
-165.964	12.369
0.000	0.000
-82.196	99.421
-171.870	17.678
0.000	0.000
-77.029	91.330
-173.118	29.210
0.000	0.000
-78.408	119.436
-174.094	29.155
0.000	0.000
-83.157	25.179
-163.301	10.440
0.000	0.000
-77.518	134.172
-171.870	35.355
0.000	0.000
-86.424	16.031
-165.964	8.246
0.000	0.000
-77.510	53.943
-173.737	27.497
0.000	0.000
-82.349	22.534
-170.910	8.439
0.000	0.000
-78.690	69.687
-170.910	16.879
26.565	0.745
-81.870	40.069
-174.144	13.068
0.000	0.000
-80.618	38.853
-168.408	13.271
0.000	0.333
-85.657	26.409
-171.870	9.428
0.000	0.000
-78.950	158.267
-169.216	35.629
0.000	0.000
-82.349	33.801
-174.094	14.577
0.000	0.000
-76.558	187.126
-170.538	48.662
0.000	0.000
-80.410	111.052
0.000	0.000
0.000	0.000
-80.011	178.709
-170.665	36.990
0.000	0.000
-79.114	26.476
-171.254	13.153
0.000	0.000
-79.695	33.541
-166.759	17.464
0.000	0.000
-83.228	161.124
-171.870	28.284
0.000	0.000
-78.040	103.752
-166.409	46.811
0.000	0.000
-78.584	106.099
-168.906	25.986
0.000	0.000
-81.355	86.483
-176.424	16.031
0.000	0.000
-82.015	111.582
-173.774	27.663
0.000	0.000
-78.823	126.397
-174.710	27.115
45.000	1.414
-79.721	98.074
0.000	0.000
0.000	0.000
-79.624	72.180
-174.806	33.136
0.000	0.000
-83.660	22.638
-165.964	8.246
0.000	0.000
-78.983	57.561
-169.695	16.771
0.000	0.000
-82.576	166.395
-172.614	27.226
0.000	0.000
-80.827	178.786
-169.919	45.706
0.000	0.000
-81.076	61.241
-165.466	13.946
0.000	0.000
-83.558	93.591
-158.962	13.928
0.000	0.000
-80.074	40.608
-173.660	27.166
0.000	0.000
-78.215	141.993
-164.745	34.205
0.000	0.000
-79.760	157.509
0.000	0.000
0.000	0.000
-82.333	52.469
-172.405	15.133
0.000	0.000
-87.138	20.025
-167.471	9.220
0.000	0.000
-77.609	270.296
0.000	0.000
0.000	0.000
-80.870	113.437
-175.030	23.087
0.000	0.000
-79.695	55.902
-176.634	17.029
45.000	1.414
-83.130	83.600
-173.660	18.111
0.000	0.000
-84.987	57.219
-173.290	17.117
0.000	0.000
-78.930	46.872
-165.069	15.524
0.000	0.000
-87.614	48.042
-171.254	13.153
0.000	1.000
-79.287	112.969
-175.236	24.083
0.000	0.000
-79.875	28.443
-165.964	8.246
0.000	0.000
-80.595	165.221
0.000	0.000
0.000	0.000
-82.967	155.168
-170.134	23.345
0.000	0.000
-79.439	60.017
-168.690	15.297
0.000	0.000
-83.191	67.476
-172.875	16.125
0.000	0.000
-80.362	161.276
0.000	0.000
0.000	0.000
-81.973	78.772
-171.529	23.759
0.000	0.000
-81.906	113.632
-170.538	24.331
0.000	0.000
-81.870	95.459
-168.930	23.436
0.000	0.000
-84.726	32.638
-169.509	13.730
0.000	0.000
-83.758	64.382
-166.759	8.732
0.000	0.000
-79.405	70.705
-173.418	26.173
33.690	1.803
-78.857	33.634
-165.964	10.308
0.000	0.000
-78.690	38.243
-174.806	11.045
0.000	0.000
-81.518	115.261
-174.289	20.100
0.000	0.000
-81.314	72.835
-177.138	20.025
0.000	0.000
-77.856	80.808
-171.254	26.306
0.000	0.000
-78.566	181.604
-167.471	36.878
0.000	0.000
-80.538	48.662
0.000	0.000
0.000	0.000
-84.134	146.769
-172.405	30.265
0.000	0.000
-81.529	47.518
-172.405	15.133
0.000	0.000
-76.419	183.120
-173.517	44.283
0.000	0.000
-83.701	77.468
-171.870	21.213
0.000	0.000
-83.346	30.203
-175.426	12.540
0.000	0.500
-79.354	67.665
-170.838	15.700
0.000	0.000
-77.963	69.529
-172.875	24.187
0.000	0.000
-77.437	183.903
-171.254	46.035
0.000	0.000
-83.395	95.635
-176.424	16.031
0.000	0.000
-81.557	129.402
-172.235	22.204
0.000	0.000
-77.905	42.953
-165.069	15.524
0.000	0.000
-81.158	45.541
-165.964	16.492
0.000	0.000
-81.085	51.624
-173.290	17.117
0.000	0.000
-77.320	205.000
0.000	0.000
0.000	0.000
-82.131	248.338
-162.525	56.613
0.000	0.000

## Sheet: 210302_BUB1_12uM_3s_002
											3.14159	s	µm	µm/s	s	µm	s	s	Event/min	Event/min	%			Growth rate			Shrink rate			Catastrophe			Rescue
angle raw	length raw		angle pol	angle depol	angle pause	length pol	length depol	length pause	N of Cata	N of rescue	G rate	G duration	G distance	S rate	S duration	S distance	Pause dur.	Time G+S	Freq Cata	Freq Rescue	% in pause			mean	SD	N	mean	SD	N	mean	SD	N	mean	SD	N
-74.989	185.324		-74.989	-172.03	0	185.324	50.488	0	1	0	0.00965357	537	5.18397	0.25713	21.0012	5.40004	0	558.001	0.111732	0	0		second	0.00675177	0.0022667	317	0.327922	0.179132	317	0.00358358	0.0026236	317	0.129525	0.132556	317
-172.030	50.488		-74.055	-171.469	0	58.241	20.224	0	1	0	0.0102854	168.001	1.72796	0.239993	9.00036	2.16003	0	177.001	0.357141	0	0		minute	0.405106	0.136002	317	19.6753	10.7479	317	0.215015	0.157416	317	7.77152	7.95338	317
0.000	0.000		-83.454	-173.66	0	61.4	9.055	0	1	0	0.00413096	182.999	0.755963	0.32401	2.99978	0.971959	0	185.999	0.32787	0	0
-74.055	58.241		-75.964	-175.601	0	111.324	26.077	0	1	0	0.00899983	324.001	2.91595	0.467968	6.00044	2.80802	0	330.001	0.185185	0	0			Growth duration			Shrink duration
-171.469	20.224		-85.135	-170.538	0	47.17	6.083	0	1	0	0.00306413	141	0.432044	0.216007	3.00002	0.648026	0	144	0.425531	0	0			mean	SD	N	mean	SD	N		TOTAL G+S	G dur	S dur.
0.000	0.000		-74.781	-172.875	0	140.943	32.249	0	1	0	0.00979379	408	3.99587	0.288	12	3.456	0	420	0.147059	0	0		sec	279.051	204.298	317	7.72049	7.90116	317	sec	90906.4	88459	2447.4
-83.454	61.400		-73.571	-174.644	0	40.66	16.07	0	1	0	0.0106152	117	1.24197	0.383987	4.5001	1.72798	0	121.5	0.512822	0	0		min	4.65084	3.40496	317	0.128675	0.131686	317	min	1515.11	1474.32	40.7899
-173.660	9.055		-75.838	-171.634	0	55.177	17.183	0	1	0	0.00908399	160.5	1.45798	0.244796	7.50017	1.83602	0	168	0.373831	0	0
0.000	0.000		-76.532	-170.665	0	122.365	36.99	0	1	0	0.00862156	357	3.0779	0.219	18.0001	3.94201	0	375	0.168067	0	0			G	C	S	R				TOTAL L G+S	G length	S length
-75.964	111.324		-83.443	-170.538	0	43.786	9.124	0	1	0	0.00413796	130.499	0.539999	0.216007	4.49978	0.971986	0	134.999	0.459775	0	0			0.00675177	0.00358358	0.327922	0.129525			µm	1303.22	635.235	667.985
-175.601	26.077		-84.207	0	0	34.677	0	0	0	0	0.0036523	103.5	0.378012		0	0	0	103.5	0		0			mean	SD	N
0.000	0.000		-76.759	-174.644	0	122.25	32.14	0	1	0	0.0084709	357	3.02411	0.383987	9.0002	3.45596	0	366	0.168067	0	0		AVG Cata	0.364013	0.370177	317
-85.135	47.170		-76.293	-175.914	0	42.202	14.036	0	1	0	0.0087805	123	1.08001	0.503952	3.00035	1.51203	0	126.001	0.487804	0	0		AVG Rescue	0.177499	1.10564	317
-170.538	6.083		-82.36	0	0	82.735	0	0	0	0	0.004829	246.002	1.18794		0	0	0	246.002	0		0		AVG %pause	0.158095	1.68388	317			<L>	J
0.000	0.000		-76.527	-175.601	0	98.717	26.077	0	1	0	0.00862489	288.001	2.48398	0.467968	6.00044	2.80802	0	294.001	0.208333	0	0								7.36524	-0.00225836
-74.781	140.943		-78.232	-173.66	0	49.031	18.111	0	1	0	0.0074998	144.001	1.07998	0.32401	5.9999	1.94403	0	150.001	0.416663	0	0		Total pause duration		1.925		EVENTs
-172.875	32.249		-77.638	-175.486	0	149.466	38.118	0	1	0	0.00789008	438.002	3.45587	0.455998	8.99997	4.10397	0	447.002	0.136986	0	0		number of pause		7		Cat/min	Rescue/min	Pause/min		Cat/µm	Rescue/µm	Pause/µm
0.000	0.000		-77.829	-172.405	0	52.173	15.133	0	1	0	0.0077644	153.001	1.18796	0.269987	6.00038	1.62003	0	159.001	0.392155	0	0						0.190597	0.269674	0.00462014		0.442356	0.0164674	0.00537131
-73.571	40.660		-78.598	-173.884	0	121.396	28.16	0	1	0	0.00726017	357	2.59189	0.335972	9.00065	3.02397	0	366.001	0.168067	0	0
-174.644	16.070		-79.548	-176.309	0	104.738	31.064	0	1	0	0.00664101	309	2.05208	0.558058	5.99929	3.34795	0	315	0.194175	0	0		pause dur./GS duration		0.00127054	min/min
0.000	0.000		-83.991	-175.236	0	9.552	6.021	0	1	0	0.00378947	28.4985	0.107994	0.431967	1.50016	0.648021	0	29.9987	2.10537	0	0		N pause / GS duration		0.00462014	event/min	0.00462014	by count	0.00462014	by count			0.00537131	by count
-75.838	55.177		-72.57	-171.384	0	45.069	16.688	0	1	0	0.0113024	128.999	1.458	0.23759	7.50016	1.78196	0	136.499	0.465121	0	0
-171.634	17.183		-74.612	-175.365	0	56.527	18.561	0	1	0	0.00990793	163.502	1.61997	0.444044	4.49962	1.99803	0	168.001	0.366969	0	0		Counting
0.000	0.000		-81.491	-172.147	0	64.207	14.637	0	1	0	0.00538601	190.501	1.02604	0.26101	5.99965	1.56597	0	196.5	0.314959	0	0		Catastrophe	Rescue	Pause	N of kymos	Frames ?
-76.532	122.365		-80.134	-169.695	0	11.673	5.59	0	1	0	0.00626099	34.5011	0.216011	0.197997	2.99995	0.593982	0	37.5011	1.73907	0	0		281	11	7		401
-170.665	36.990		-81.703	-172.235	0	48.508	11.102	0	1	0	0.0052499	144.001	0.755991	0.264005	4.49998	1.18802	0	148.501	0.416664	0	0
0.000	0.000		-83.601	-173.991	0	53.835	9.552	0	1	0	0.00403741	160.499	0.648	0.342	2.99984	1.02595	0	163.499	0.373835	0	0
-83.443	43.786		-78.097	0	0	104.241	0	0	0	0	0.00758835	305.999	2.32203		0	0	0	305.999	0		0
-170.538	9.124		-78.593	-174.472	0	116.297	31.145	0	1	0	0.00726344	341.999	2.4841	0.371968	9.0008	3.34802	0	351	0.175439	0	0
0.000	0.000		-76.119	-175.601	0	179.234	52.154	0	1	0	0.00889642	521.999	4.64393	0.467968	12.0009	5.61604	0	534	0.114943	0	0
-84.207	34.677		-76.142	-172.776	0	77.935	23.856	0	1	0	0.00888109	226.999	2.016	0.284012	8.99959	2.556	0	235.999	0.264318	0	0
0.000	0.000		-86.939	-177.709	0	62.422	8.34	0	1	0	0.00192511	186.999	0.359994	0.899846	1.00017	0.9	0	187.999	0.320858	0	0
0.000	0.000		-85.163	-175.236	0	43.488	8.028	0	1	0	0.00304641	129.999	0.396032	0.431967	2.00022	0.864029	0	132	0.461541	0	0
-76.759	122.250		-74.718	0	0	122.671	0	0	0	0	0.00983632	355	3.4919		0	0	0	355	0		0
-174.644	32.140		-75.53	-174.428	0	64.031	20.597	0	1	0	0.00929012	186	1.72796	0.369013	5.99969	2.21397	0	191.999	0.322581	0	0
0.000	0.000		-75.906	-173.758	0	121.147	32.191	0	1	0	0.00903856	352.501	3.1861	0.329138	10.5002	3.45602	0	363.001	0.170213	0	0
-76.293	42.202		-76.578	-171.347	0	135.706	46.53	0	1	0	0.00859101	395.998	3.40203	0.236558	21.0013	4.96804	0	417	0.151516	0	0
-175.914	14.036		-83.066	-177.064	0	37.273	9.763	0	1	0	0.00437815	111.001	0.48598	0.701921	1.5002	1.05302	0	112.501	0.540535	0	0
0.000	0.000		-77.775	-177.797	0	15.348	6.505	0	1	0	0.00779991	44.9999	0.350995	0.935828	0.750159	0.702021	0	45.75	1.33334	0	0
-82.360	82.735		-80.942	-174.289	0	17.468	5.025	0	1	0	0.0057392	51.7505	0.297007	0.359974	1.50013	0.540006	0	53.2506	1.15941	0	0
0.000	0.000		-78.586	-172.972	0	80.849	18.388	0	1	0	0.00726802	237.75	1.72797	0.292016	6.74956	1.97098	0	244.5	0.252366	0	0
0.000	0.000		-76.373	-175.962	0	67.912	28.404	0	1	0	0.00872727	198.001	1.72801	0.509963	6.00046	3.06002	0	204.001	0.303029	0	0
-76.527	98.717		-76.561	-175.601	0	131.947	30.423	0	1	0	0.0086023	385.002	3.31191	0.467968	7.00048	3.276	0	392.003	0.155843	0	0
-175.601	26.077		-79.086	-173.118	0	75.703	19.474	0	1	0	0.00694162	223.001	1.54799	0.298273	7.00041	2.08804	0	230.002	0.269057	0	0
0.000	0.000		-73.056	0	0	97.22	0	0	0	0	0.0109678	278.999	3.06002		0	0	0	278.999	0		0
-78.232	49.031		-81.238	-171.674	0	134.571	41.437	0	1	0	0.00554864	399.002	2.21392	0.245989	18.0009	4.42803	0	417.002	0.150375	0	0
-173.660	18.111		-78.633	-176.496	0	65.96	16.364	0	1	0	0.00723729	193.999	1.40403	0.587921	3.00042	1.76401	0	196.999	0.309281	0	0
0.000	0.000		-72.235	-175.192	0	108.157	35.793	0	1	0	0.0115341	308.999	3.56402	0.427995	9.00018	3.85204	0	317.999	0.194175	0	0
-77.638	149.466		-73.718	-177.436	90	70.147	22.356	0	1	0	0.0105149	202.001	2.12401	0.803927	3.00031	2.41203	0	205.001	0.297028	0	0
-175.486	38.118		-83.66	-175.236	0	21.129	8.028	0	1	0	0.00399987	62.9993	0.25199	0.431967	2.00022	0.864029	0	64.9995	0.952391	0	0
0.000	0.000		-75.192	-175.914	90	44.994	21.054	0.5	1	0	0.00951698	130.499	1.24196	0.503952	4.50053	2.26805	1.5	134.999	0.459774	0	1.11112
-77.829	52.173		-79.743	-172.073	0	160.058	39.881	0	1	1	0.0065144	472.5	3.07806	0.258543	16.5001	4.26599	0	489	0.126984	3.63634	0
-172.405	15.133		-65.225	-173.991	0	28.636	19.105	0	1	0	0.0166153	78.0011	1.29601	0.342	6	2.052	0	84.0011	0.76922	0	0
0.000	0.000		-77.471	-174.094	0	24.585	9.718	0	1	0	0.00800012	71.9986	0.575998	0.348008	2.99985	1.04397	0	74.9985	0.833349	0	0
-78.598	121.396		-79.695	-170.074	0	52.175	13.536	0	1	0	0.00654555	154	1.00802	0.205719	6.99985	1.44001	0	161	0.38961	0	0
-173.884	28.160		-82.255	-170.538	0	42.05	10.138	0	1	0	0.00489618	124.999	0.612019	0.216007	4.99986	1.08001	0	129.999	0.480003	0	0
0.000	0.000		-78.906	-170.91	0	17.324	8.439	0	1	0	0.007059	51.0008	0.360015	0.225007	3.99972	0.899966	0	55.0005	1.17645	0	0
-79.548	104.738		-78.323	-175.533	0	102.113	21.398	0	1	0	0.00744016	299.999	2.23204	0.460816	4.99974	2.30396	0	304.999	0.200001	0	0
-176.309	31.064		-76.918	-170.754	0	310.731	72.61	0	1	0	0.00836553	908	7.59591	0.221145	34.9995	7.74	0	942.999	0.0660793	0	0
0.000	0.000		-81.254	-169.592	0	43.843	16.607	0	1	0	0.00553835	130	0.719984	0.195994	9.00049	1.76405	0	139	0.46154	0	0
-83.991	9.552		-80.385	-174.943	0	185.607	37.814	0	1	0	0.00609863	548.999	3.34815	0.40682	9.99954	4.06802	0	558.999	0.10929	0	0
-175.236	6.021		-75.784	-170.538	0	51.579	18.248	0	1	0	0.00912009	149.998	1.368	0.216007	8.99955	1.94397	0	158.998	0.400004	0	0
0.000	0.000		-78.776	-172.6	0	131.006	38.823	0	1	0	0.00714386	385.501	2.75397	0.277184	15.0007	4.15796	0	400.502	0.155642	0	0
-72.570	45.069		-82.648	-174.094	0	62.514	14.577	0	1	0	0.00464491	186	0.863956	0.348008	4.49978	1.56596	0	190.5	0.32258	0	0
-171.384	16.688		-80.248	-174.685	0	64.938	21.593	0	1	0	0.00618722	191.999	1.18794	0.386966	6.00056	2.32202	0	198	0.312502	0	0
0.000	0.000		-75.838	-173.387	0	110.354	34.731	0	1	0	0.00908399	321	2.91597	0.310522	11.9991	3.72599	0	332.999	0.186916	0	0
-74.612	56.527		-78.283	-174.428	0	68.937	20.597	0	1	0	0.00746637	202.502	1.51195	0.369013	5.99969	2.21397	0	208.501	0.296294	0	0
-175.365	18.561		-77.735	-171.87	0	35.306	14.142	0	1	0	0.00782623	103.5	0.810019	0.252003	5.99987	1.51199	0	109.5	0.579707	0	0
0.000	0.000		-87.344	0	0	194.209	0	0	0	0	0.00167001	582.001	0.971948		0	0	0	582.001	0		0
-81.491	64.207		-80.293	-176.82	0	38.552	18.028	0	1	0	0.00615811	114	0.702026	0.647965	3.0002	1.94403	0	117	0.526315	0	0
-172.147	14.637		-76.724	-172.694	0	45.722	19.66	0	1	0	0.00849411	133.5	1.13397	0.28079	7.5004	2.10604	0	141.001	0.449437	0	0
0.000	0.000		-79.743	-172.648	0	53.353	15.628	0	1	0	0.0065144	157.501	1.02603	0.279014	5.9995	1.67395	0	163.501	0.38095	0	0
-80.134	11.673		-80.373	0	0	200.321	0	0	0	0	0.00610639	592.5	3.61804		0	0	0	592.5	0		0
-169.695	5.590		-76.054	-173.157	0	51.175	16.786	0	1	0	0.00893977	149	1.33202	0.29999	6.00011	1.79997	0	155	0.402686	0	0
0.000	0.000		-77.335	-171.298	0	121.626	33.047	0	1	0	0.00808984	356	2.87999	0.235206	14.9996	3.52799	0	371	0.168539	0	0
-81.703	48.508		-82.875	-167.471	0	8.062	6.146	0	1	0	0.00449999	23.9992	0.107996	0.161997	3.99982	0.647961	0	27.9991	2.50008	0	0
-172.235	11.102		-83.565	-174.094	0	66.922	14.577	0	1	0	0.00406031	199.501	0.810038	0.348008	4.49978	1.56596	0	204.001	0.30075	0	0
0.000	0.000		-81.545	-175.236	0	37.407	12.042	0	1	0	0.00535133	111.001	0.594005	0.431967	3.00033	1.29604	0	114.002	0.540534	0	0
-83.601	53.835		-77.602	-175.684	0	118.77	26.575	0	1	0	0.00791379	348.001	2.75401	0.477003	5.99988	2.86196	0	354.001	0.172413	0	0
-173.991	9.552		-85.236	-174.806	0	36.125	11.045	0	1	0	0.00300022	108.001	0.324026	0.396032	2.99965	1.18796	0	111	0.555553	0	0
0.000	0.000		-81.747	-176.055	0	66.185	14.534	0	1	0	0.00522167	196.499	1.02605	0.522024	2.99977	1.56595	0	199.499	0.305345	0	0
-78.097	104.241		-84.596	-176.82	0	37.165	9.014	0	1	0	0.00340553	110.999	0.378013	0.647965	1.5001	0.972013	0	112.5	0.540543	0	0
0.000	0.000		-78.69	-175.84	0	119.827	27.573	0	1	1	0.00720004	352.5	2.53802	0.494957	6.0006	2.97004	0	358.501	0.170213	9.99901	0
0.000	0.000		-82.461	-171.254	0	34.297	6.576	0	1	0	0.00476442	102.002	0.485979	0.234004	2.99973	0.70195	0	105.001	0.588226	0	0
-78.593	116.297		-83.758	-170.91	0	32.191	12.659	0	1	0	0.00393755	96.0005	0.378007	0.225007	5.99982	1.35	0	102	0.624997	0	0
-174.472	31.145		-82.763	-171.87	0	31.753	10.607	0	1	0	0.00457147	94.5001	0.432005	0.252003	4.50011	1.13404	0	99.0002	0.63492	0	0
0.000	0.000		-80.949	-175.156	0	171.637	29.606	0	1	0	0.00573469	508.5	2.91609	0.4248	7.50006	3.18603	0	516	0.117994	0	0
-76.119	179.234		-75.396	-175.515	0	73.371	25.578	0	1	0	0.00937997	213.001	1.99795	0.458959	6.00045	2.75397	0	219.002	0.281688	0	0
-175.601	52.154		-81.87	-178.21	0	49.497	16.008	0	1	0	0.00514279	146.999	0.755983	1.15194	1.50009	1.72802	0	148.499	0.408167	0	0
0.000	0.000		-73.78	-171.469	0	28.64	10.112	0	1	0	0.0104726	82.5001	0.86399	0.239993	4.50018	1.08001	0	87.0002	0.727272	0	0
-76.142	77.935		-81.384	-175.914	0	16.688	7.018	0	1	0	0.00545477	49.499	0.270006	0.503952	1.50018	0.756017	0	50.9992	1.21215	0	0
-172.776	23.856		-79.972	-171.027	0	83.272	19.235	0	1	1	0.00636591	246	1.56601	0.22799	9.00019	2.05196	0	255	0.243903	6.66652	0
0.000	0.000		-79.136	-173.66	0	50.403	4.528	0	1	0	0.00690904	148.499	1.02599	0.32401	1.50006	0.486033	0	149.999	0.404043	0	0
-86.939	62.422		-77.989	-176.186	0	72.078	22.55	0	1	0	0.00765925	211.5	1.61993	0.54001	4.49992	2.43001	0	216	0.283688	0	0
-177.709	8.340		-81.06	-173.157	0	45.047	12.59	0.5	1	0	0.0056632	133.499	0.756033	0.29999	4.50026	1.35003	0	138	0.449441	0	0
0.000	0.000		-79.261	-172.235	0	29.517	11.102	0	1	0	0.00682765	87.0001	0.594007	0.264005	4.49998	1.18802	0	91.5001	0.689654	0	0
-85.163	43.488		-81.87	-171.87	0	14.142	7.071	0	1	0	0.00514279	41.9996	0.215995	0.252003	2.99993	0.755993	0	44.9995	1.42858	0	0
-175.236	8.028		-81.373	-171.87	0	73.33	14.142	0	1	0	0.00546184	217.501	1.18796	0.252003	5.99987	1.51199	0	223.501	0.275861	0	0
0.000	0.000		-81.416	-170.106	0	214.401	43.649	0	1	0	0.0054342	635.998	3.45614	0.206398	22.5001	4.64398	0	658.498	0.0943399	0	0
-74.718	122.671		-75.671	-170.538	0	189.908	42.579	0	1	0	0.00919568	552	5.07602	0.216007	20.9991	4.53597	0	572.999	0.108696	0	0
0.000	0.000		-77.989	-175.236	0	48.052	12.042	0	1	0	0.00765925	141	1.07996	0.431967	3.00033	1.29604	0	144	0.425532	0	0
0.000	0.000		-76.519	-170.789	0	150.137	37.483	0	1	0	0.0086302	438.001	3.78004	0.222	17.9998	3.99597	0	456.001	0.136986	0	0
-75.530	64.031		-80.947	-170.134	0	184.296	46.69	0	1	0	0.00573598	546.001	3.13185	0.206996	24.0002	4.96795	0	570.001	0.10989	0	0
-174.428	20.597		-77.276	-167.905	0	63.561	14.318	0	1	0	0.00812879	186	1.51196	0.167996	9.00029	1.51202	0	195.001	0.32258	0	0
0.000	0.000		-77.471	-167.471	0	18.439	9.22	0	1	0	0.00800012	53.9997	0.432004	0.161997	6.00039	0.972047	0	60.0001	1.11112	0	0
-75.906	121.147		-80.538	-171.254	0	42.579	13.153	0	1	0	0.00599979	125.999	0.755968	0.234004	5.99991	1.40401	0	131.999	0.476194	0	0
-173.758	32.191		-80.91	-171.87	0	50.636	14.142	0	1	0	0.00575982	150	0.863975	0.252003	5.99987	1.51199	0	156	0.399999	0	0
0.000	0.000		-76.657	-172.093	0	160.328	36.346	0	1	0	0.00853856	468	3.99605	0.259205	14.9999	3.88805	0	483	0.128205	0	0
-76.578	135.706		-79.38	-169.992	0	48.836	17.263	0	1	0	0.00675022	143.998	0.972022	0.203999	9.00019	1.83603	0	152.999	0.416671	0	0
-171.347	46.530		-80.395	-169.992	0	65.924	17.263	0	1	0	0.00609217	195	1.18797	0.203999	9.00019	1.83603	0	204	0.307693	0	0
0.000	0.000		-78.579	0	0	202	0	0	0	0	0.0072726	594	4.31993		0	0	0	594	0		0
-83.066	37.273		-78.742	-170.311	0	215.139	41.593	0	1	0	0.00716606	632.998	4.53611	0.210852	21.0003	4.42797	0	653.998	0.094787	0	0
-177.064	9.763		-79.38	-170.538	0	16.279	6.083	0	1	0	0.00675022	48.0005	0.324014	0.216007	3.00002	0.648026	0	51.0005	1.24999	0	0
0.000	0.000		-79.509	0	0	109.836	0	0	0	0	0.00666635	324	2.1599		0	0	0	324	0		0
-77.775	15.348		-78.193	-172.504	0	180.826	38.328	0	1	0	0.00752537	531	3.99598	0.273594	15.0005	4.10405	0	546.001	0.112994	0	0
-177.797	6.505		-78.768	-174.685	0	143.753	43.186	0	1	0	0.00714908	422.999	3.02406	0.386966	12.0011	4.64403	0	435	0.141844	0	0
0.000	0.000		-81.973	-172.648	0	78.772	31.257	0	1	0	0.00507677	234.001	1.18797	0.279014	11.9994	3.348	0	246	0.25641	0	0
-80.942	17.468		-76.931	-171.634	0	114.978	34.366	0	1	0	0.00835692	336	2.80793	0.244796	15.0003	3.67203	0	351	0.178572	0	0
-174.289	5.025		-77.619	-173.29	0	41.976	17.117	0	1	0	0.00790259	122.999	0.972015	0.305992	6.00006	1.83597	0	128.999	0.487807	0	0
0.000	0.000		-74.745	-170.538	0	79.812	24.331	0	1	0	0.00981809	230.999	2.26797	0.216007	11.9996	2.592	0	242.999	0.259741	0	0
-78.586	80.849		-75.379	-165.964	0	47.539	20.616	0	1	0	0.00939138	137.999	1.296	0.144002	15.0001	2.16005	0	152.999	0.434787	0	0
-172.972	18.388		-80.981	-176.424	0	127.577	16.031	0	1	0	0.00571407	377.999	2.15992	0.576053	2.99968	1.72798	0	380.999	0.158731	0	0
0.000	0.000		-77.471	0	0	64.537	0	0	0	0	0.00800012	189	1.51203		0	0	0	189	0		0
-76.373	67.912		-78.291	-173.558	0	98.551	31.197	0	1	0	0.00746113	289.501	2.16001	0.318837	10.5007	3.348	0	300.001	0.207253	0	0
-175.962	28.404		-81.027	-175.601	0	38.471	13.038	0	1	0	0.00568445	114.001	0.648031	0.467968	3.00011	1.40396	0	117.001	0.526313	0	0
0.000	0.000		-78.447	-172.569	0	184.743	46.39	0	1	0	0.00735896	543	3.99592	0.276015	17.9992	4.96804	0	560.999	0.110497	0	0
-76.561	131.947		-81.193	-171.703	0	107.771	24.254	0	1	0	0.00557759	319.501	1.78205	0.246861	10.4999	2.59202	0	330.001	0.187793	0	0
-175.601	30.423		-80.042	-170.727	0	66.502	24.824	0	1	0	0.00632056	196.5	1.24199	0.22049	12.0003	2.64596	0	208.501	0.305343	0	0
0.000	0.000		-79.315	-170.218	0	107.87	29.428	0	1	0	0.0067925	317.999	2.16001	0.208809	14.9994	3.13202	0	332.998	0.18868	0	0
-79.086	75.703		-76.264	-175.764	0	92.65	27.074	2	1	0	0.00879981	270.001	2.37596	0.486045	5.99945	2.916	0	276	0.222222	0	0
-173.118	19.474		-77.276	-173.157	0	63.561	25.179	0	1	0	0.00812879	186	1.51196	0.29999	9.00017	2.69996	0	195	0.32258	0	0
0.000	0.000		-74.65	-172.03	0	158.66	50.488	1	1	0	0.00988225	459	4.53596	0.25713	21.0012	5.40004	0	480.001	0.130719	0	0
-73.056	97.220		-77.605	-174.094	0	93.172	29.155	0	1	0	0.00791181	273.001	2.15993	0.348008	8.99986	3.13203	0	282.001	0.21978	0	0
0.000	0.000		-78.69	-175.236	0	30.594	12.042	1	1	0	0.00720004	89.9996	0.648001	0.431967	3.00033	1.29604	0	93	0.666669	0	0
0.000	0.000		-74.914	0	0	119.105	0	0	0	0	0.0097041	345.001	3.34792		0	0	0	345.001	0		0
-81.238	134.571		-74.32	-174.806	0	59.203	22.091	0	1	0	0.0101056	170.999	1.72805	0.396032	5.99958	2.37603	0	176.999	0.350878	0	0
-171.674	41.437		-79.695	-165.964	0	22.361	12.369	0	1	0	0.00654555	66.0009	0.432013	0.144002	8.99962	1.29597	0	75.0005	0.909078	0	0
0.000	0.000		-74.962	0	0	208.127	0	0	0	0	0.00967176	602.998	5.83206		0	0	0	602.998	0		0
-78.633	65.960		-76.386	-171.469	0	131.7	40.447	0	1	0	0.00871862	383.999	3.34795	0.239993	18.0003	4.31994	0	401.999	0.15625	0	0
-176.496	16.364		-76.715	0	0	221.939	0	0	0	0	0.00850008	647.999	5.50805		0	0	0	647.999	0		0
0.000	0.000		-79.011	-173.418	0	52.462	26.173	0	1	0	0.00699051	154.5	1.08004	0.311997	9.00025	2.80805	0	163.5	0.388349	0	0
-72.235	108.157		-74.226	-170.538	0	91.963	30.414	0	1	0	0.0101693	265.499	2.69995	0.216007	14.9996	3.24002	0	280.499	0.225989	0	0
-175.192	35.793		-75.71	-172.983	0	109.385	32.745	0	1	0	0.00916958	318.001	2.91594	0.292479	12.0008	3.50997	0	330.002	0.188678	0	0
0.000	0.000		-80.647	-177.51	0	86.145	23.022	0	1	0	0.00592942	254.999	1.512	0.82785	3.00057	2.48403	0	258	0.235295	0	0
-73.718	70.147		-75.964	-170.538	0	28.862	12.166	0	1	0	0.00899983	84.0008	0.755994	0.216007	6.00003	1.29605	0	90.0009	0.714279	0	0
-177.436	22.356		-85.365	-174.289	0	37.121	10.05	0	1	0	0.00291862	110.999	0.323964	0.359974	3.00025	1.08001	0	113.999	0.540546	0	0
90.000	0.333		-74.854	0	0	137.786	0	0	0	0	0.00974455	398.999	3.88807		0	0	0	398.999	0		0
-83.660	21.129		-81.809	-173.48	0	66.68	17.614	0	1	0	0.0051819	197.999	1.02601	0.31499	6.00021	1.89001	0	204	0.303031	0	0
-175.236	8.028		-77.672	-172.461	0	154.564	34.297	0	1	0	0.00786769	453	3.56407	0.272016	13.4994	3.67206	0	466.499	0.13245	0	0
0.000	0.000		-81.469	-171.119	0	50.559	16.194	0.5	1	0	0.00540015	149.999	0.810016	0.230391	7.50022	1.72798	0	157.499	0.400003	0	0
-75.192	44.994		-78.805	-172.648	0	97.862	31.257	0	1	0	0.00712492	288	2.05198	0.279014	11.9994	3.348	0	299.999	0.208334	0	0
-175.914	21.054		-82.539	-167.471	0	84.717	18.439	1	1	0	0.00471456	251.999	1.18807	0.161997	12.0001	1.94399	0	263.999	0.238096	0	0
90.000	0.500		-81.158	-168.69	-90	182.165	35.693	1	1	0	0.00560011	540	3.02407	0.179999	21	3.77998	3	561	0.111111	0	0.534759
-79.743	160.058		-78.887	-171.87	0	57.07	14.142	0	1	0	0.0070714	168	1.18799	0.252003	5.99987	1.51199	0	174	0.357144	0	0
-172.073	39.881		-79.778	0	0	123.968	0	0	0	0	0.00649169	366.001	2.37597		0	0	0	366.001	0		0
0.000	0.000		-81.87	-169.334	0	21.213	7	0	1	0	0.00514279	62.9994	0.323993	0.191146	3.88675	0.742938	0	66.8862	0.95239	0	0
-65.225	28.636		-84.806	-164.055	-90	22.091	7.28	1	1	0	0.00327245	66.0009	0.215985	0.126003	5.99976	0.75599	3	72.0006	0.909079	0	4.16663
-173.991	19.105		-76.675	0	0	117.154	0	0	0	0	0.00852662	342	2.91611		0	0	0	342	0		0
0.000	0.000		-84.094	-173.66	0	58.31	18.111	0	1	0	0.00372404	174.001	0.64799	0.32401	5.9999	1.94403	0	180.001	0.344825	0	0
-77.471	24.585		-76.486	-166.809	0	239.635	65.734	0	1	0	0.00865213	699.001	6.04785	0.153595	45.0011	6.91196	0	744.002	0.0858368	0	0
-174.094	9.718		-82.03	-168.69	0	50.488	20.396	0	1	0	0.00504024	150.001	0.756042	0.179999	12	2.15999	0	162.001	0.399997	0	0
0.000	0.000		-72.284	-174.56	0	75.584	21.095	0	1	0	0.0115001	215.999	2.48402	0.378023	5.99963	2.268	0	221.998	0.27778	0	0
-79.695	52.175		-82.875	-173.66	0	16.125	9.055	0	1	0	0.00449999	48.0014	0.216006	0.32401	2.99978	0.971959	0	51.0012	1.24996	0	0
-170.074	13.536		-77.642	-172.875	0	60.741	21.499	0	1	0	0.00788744	178.001	1.40397	0.288	7.99985	2.30396	0	186.001	0.337077	0	0
45.000	0.471		-77.253	-173.811	0	104.236	27.829	0	1	0	0.00814398	305.001	2.48392	0.331979	9.00061	2.98801	0	314.002	0.196721	0	0
-82.255	42.050		-78.551	-173.797	0	53.736	15.424	0	1	0	0.00729091	158	1.15197	0.331224	4.99975	1.65604	0	163	0.379746	0	0
-170.538	10.138		-79.603	-168.179	0	36.94	14.644	0	1	0	0.00660528	109	0.719979	0.172007	8.99968	1.54801	0	118	0.550457	0	0
0.000	0.667		-77.661	-170.961	0	32.757	22.277	0	1	0	0.00787493	96.001	0.756002	0.226298	10.4996	2.37604	0	106.501	0.624994	0	0
-78.906	17.324		-80.34	-170.538	0	47.676	12.166	0	1	0	0.00612772	141	0.86401	0.216007	6.00003	1.29605	0	147	0.425532	0	0
-170.910	8.439		-80.91	-172.405	0	25.318	7.566	0	1	0	0.00575982	75.0001	0.431987	0.269987	2.99999	0.809959	0	78.0001	0.799999	0	0
0.000	0.000		-80.327	-172.648	0	44.635	15.628	0	1	0	0.00613613	132.001	0.809977	0.279014	5.9995	1.67395	0	138.001	0.454541	0	0
-78.323	102.113		-77.646	0	0	177.613	0	0	0	0	0.00788481	520.501	4.10405		0	0	0	520.501	0		0
-175.533	21.398		-79.992	-173.66	0	17.263	9.055	0	1	0	0.00635295	51.001	0.324007	0.32401	2.99978	0.971959	0	54.0007	1.17645	0	0
0.000	0.000		-76.538	0	0	266.317	0	0	1	0	0.00861758	776.999	6.69586		0	0	0	776.999	0.0772201		0
-76.918	310.731		-76.643	-176.055	0	112.544	29.069	0	1	0	0.00854786	328.499	2.80796	0.522024	5.99974	3.13201	0	334.499	0.182649	0	0
-170.754	72.610		-77.634	0	0	95.721	0	0	0	0	0.00789271	280.501	2.21391		0	0	0	280.501	0		0
0.000	0.000		-75.797	-175.657	0	111.405	26.409	0	1	0	0.0091114	323.999	2.95209	0.474026	5.99963	2.84398	0	329.999	0.185186	0	0
-81.254	43.843		-78.486	0	0	82.663	0	0	0	0	0.00733344	242.998	1.78202		0	0	0	242.998	0		0
-169.592	16.607		-77.042	-173.418	0	115.953	26.173	0	1	0	0.00828346	339.001	2.8081	0.311997	9.00025	2.80805	0	348.001	0.176991	0	0
0.000	0.000		-78.805	-172.147	0	97.862	29.275	0	1	0	0.00712492	288	2.05198	0.26101	11.9997	3.13205	0	299.999	0.208334	0	0
-80.385	185.607		-78.546	-171.87	0	156.109	42.426	0	1	0	0.00729418	459	3.34803	0.252003	17.9996	4.53596	0	477	0.130719	0	0
-174.943	37.814		-82.235	-169.695	0	44.407	11.18	0	1	0	0.00490898	131.999	0.647983	0.197997	5.99991	1.18796	0	137.999	0.454547	0	0
0.000	0.667		-78.805	-175.601	0	97.862	26.077	0	1	0	0.00712492	288	2.05198	0.467968	6.00044	2.80802	0	294	0.208334	0	0
-75.784	51.579		-79.144	-173.48	0	148.661	35.228	0	1	1	0.00690383	438.002	3.02389	0.31499	12.0004	3.78002	0	450.002	0.136986	4.99982	0
-170.538	18.248		-85.914	-171.254	0	28.071	6.576	0	1	0	0.00257167	83.9989	0.216018	0.234004	2.99973	0.70195	0	86.9987	0.714295	0	0
0.000	0.000		-84.289	-170.538	0	65.324	15.207	0	1	0	0.00360025	194.999	0.702048	0.216007	7.49979	1.62001	0	202.499	0.307693	0	0
-78.776	131.006		-84.359	-171.027	-90	40.697	9.618	11.5	1	0	0.00355584	121.5	0.432034	0.22799	4.50033	1.02603	34.5	126	0.493828	0	27.3809
-172.600	38.823		-77.167	-169.992	-90	132.818	34.525	10	1	0	0.0082008	388.501	3.18602	0.203999	17.9999	3.67196	30	406.501	0.15444	0	7.38005
0.000	0.000		-83.797	-175.236	0	23.135	6.021	0	1	0	0.00391275	68.9987	0.269975	0.431967	1.50016	0.648021	0	70.4988	0.869582	0	0
-82.648	62.514		-82.648	-176.186	0	15.628	7.517	0	1	0	0.00464491	46.4986	0.215982	0.54001	1.50004	0.810038	0	47.9986	1.29036	0	0
-174.094	14.577		-83.047	-174.289	0	20.652	5.025	0	1	0	0.00439027	61.5004	0.270003	0.359974	1.50013	0.540006	0	63.0005	0.975604	0	0
0.000	0.000		-84.237	-172.569	0	54.777	11.597	0	1	0	0.00363326	163.5	0.59404	0.276015	4.49959	1.24196	0	168	0.366972	0	0
-80.248	64.938		-74.944	-175.236	90	88.54	30.104	0.5	1	0	0.00968388	256.502	2.48394	0.431967	7.50057	3.24	1.5	264.002	0.233916	0	0.568177
-174.685	21.593		-73.301	-175.236	0	36.541	12.042	0	1	0	0.0107998	105	1.13398	0.431967	3.00033	1.29604	0	108	0.571429	0	0
0.000	0.000		-75.069	-169.875	0	108.669	28.443	0	1	0	0.00959971	315	3.02391	0.201593	15.0005	3.024	0	330	0.190476	0	0
-75.838	110.354		-76.142	0	0	233.805	0	0	1	1	0.00888109	680.998	6.04801		0	0	0	680.998	0.0881059		0
-173.387	34.731		-83.991	-172.875	0	38.21	12.093	0	1	0	0.00378947	114	0.432	0.288	4.49985	1.29596	0	118.5	0.526315	0	0
0.000	0.000		-82.753	-176.73	0	87.197	17.529	0	1	0	0.00457786	259.501	1.18796	0.630094	2.99963	1.89005	0	262.501	0.231213	0	0
-78.283	68.937		-86.987	-177.6	0	9.513	4	0	1	0	0.00189487	28.4995	0.054003	0.858933	0.502508	0.431621	0	29.0021	2.1053	0	0
-174.428	20.597		-82.117	-172.235	0	32.81	11.102	0	1	0	0.00498452	97.4999	0.485991	0.264005	4.49998	1.18802	0	102	0.615386	0	0
0.000	0.000		-71.238	0	0	166.339	0	0	0	0	0.0122288	472.501	5.7781		0	0	0	472.501	0		0
-77.735	35.306		-76.651	-171.416	0	181.915	53.6	0	1	0	0.00854255	531	4.5361	0.238489	24.0009	5.72395	0	555.001	0.112994	0	0
-171.870	14.142		-78.111	0	0	38.833	0	0	0	0	0.00757916	114	0.864025		0	0	0	114	0		0
0.000	0.000		-77.574	-174.289	0	120.83	30.15	0	1	0	0.00793223	353.999	2.808	0.359974	9.00075	3.24004	0	362.999	0.169492	0	0
-87.344	194.209		-81.384	-171.87	0	16.688	7.071	0	1	0	0.00545477	49.499	0.270006	0.252003	2.99993	0.755993	0	52.4989	1.21215	0	0
0.000	0.000		-80.961	-171.254	0	22.277	6.576	0	1	0	0.00572696	66.0011	0.377986	0.234004	2.99973	0.70195	0	69.0008	0.909076	0	0
0.000	0.000		-75.538	0	0	114.116	0	0	1	0	0.00928476	331.5	3.0779		0	0	0	331.5	0.180995		0
-80.293	38.552		-78.218	-173.157	0	83.254	25.179	0	1	0	0.00750898	244.5	1.83595	0.29999	9.00017	2.69996	0	253.5	0.245399	0	0
-176.820	18.028		-86.682	-174.56	0	138.232	21.095	0	1	0	0.00208709	414.001	0.864059	0.378023	5.99963	2.268	0	420	0.144927	0	0
0.000	0.000		-76.527	-172.875	0	98.717	32.249	0	1	0	0.00862489	288.001	2.48398	0.288	12	3.456	0	300.001	0.208333	0	0
-76.724	45.722		-76.866	-173.29	0	61.612	17.117	0	1	0	0.00839998	180.001	1.51201	0.305992	6.00006	1.83597	0	186.001	0.333332	0	0
-172.694	19.660		-83.797	-171.573	0	185.084	27.295	0	2	2	0.00391275	552.001	2.15985	0.242999	12.0002	2.91603	0	564.001	0.217391	9.99985	0
0.000	0.000		-80.362	-175.236	0	53.759	12.042	0	1	0	0.0061135	159.001	0.972051	0.431967	3.00033	1.29604	0	162.001	0.377357	0	0
-79.743	53.353		-77.978	-175.236	0	110.422	24.083	0	1	0	0.00766648	324.001	2.48395	0.431967	6.0004	2.59198	0	330.001	0.185185	0	0
-172.648	15.628		-80.322	-172.405	0	130.863	30.265	2	1	0	0.00613936	387.002	2.37595	0.269987	12.0004	3.23994	0	399.002	0.155038	0	0
0.000	0.000		-77.593	-173.418	0	102.391	26.173	0	1	0	0.00791972	299.999	2.37591	0.311997	9.00025	2.80805	0	309	0.2	0	0
-80.373	200.321		-80.272	-170.538	0	35.511	12.166	0	1	0	0.00617169	105.001	0.648036	0.216007	6.00003	1.29605	0	111.001	0.571422	0	0
0.000	0.000		-78.465	0	0	50.01	0	0	0	0	0.00734718	147	1.08004		0	0	0	147	0		0
0.000	0.000		-79.854	-174.289	0	96.509	20.1	0	1	0	0.00644239	284.999	1.83608	0.359974	6.0005	2.16003	0	291	0.210527	0	0
-76.054	51.175		-76.667	0	0	177.792	0	0	1	1	0.00853193	518.999	4.42807		0	0	0	518.999	0.115607		0
-173.157	16.786		-79.808	-176.634	0	180.854	34.059	0	1	0	0.00647223	534.001	3.45618	0.612083	5.99922	3.67203	0	540	0.112359	0	0
0.000	0.000		-76.192	-171.384	0	121.511	33.377	0	1	0	0.00884777	353.998	3.1321	0.23759	15.0008	3.56404	0	368.999	0.169492	0	0
-77.335	121.626		-79.935	-171.416	0	234.61	53.6	0	1	0	0.00638988	692.998	4.42818	0.238489	24.0009	5.72395	0	716.999	0.0865803	0	0
-171.298	33.047		-80.218	-175.515	0	73.57	25.578	0	1	0	0.00620663	217.501	1.34995	0.458959	6.00045	2.75397	0	223.502	0.275861	0	0
0.000	0.000		-76.402	-168.906	0	174.388	51.971	0.5	1	0	0.00870798	508.499	4.428	0.183595	30.0007	5.50798	0	538.5	0.117994	0	0
-82.875	8.062		-85.135	-165.069	0	23.585	7.762	0	1	0	0.00306413	70.5001	0.216022	0.135004	5.99977	0.809992	0	76.4999	0.851063	0	0
-167.471	6.146		-84.753	0	0	49.206	0	0	0	0	0.00330603	146.999	0.485985		0	0	0	146.999	0		0
0.000	0.000		-86.309	-177.138	0	31.064	20.025	0	1	0	0.00232233	92.9987	0.215974	0.720101	2.99958	2.16	0	95.9983	0.64517	0	0
-83.565	66.922		-85.179	-173.774	0	333.179	55.326	0	1	1	0.00303629	996.001	3.02415	0.329991	18.0004	5.93997	0	1014	0.0602409	3.33326	0
-174.094	14.577		-77.949	-172.185	0	182.011	51.478	0	1	0	0.00768553	534	4.10407	0.262295	20.9992	5.50799	0	554.999	0.11236	0	0
0.000	0.000		-74.476	0	0	56.045	0	0	0	0	0.00999991	162.001	1.62		0	0	0	162.001	0		0
-81.545	37.407		-85.236	-171.254	0	48.166	13.153	0	1	0	0.00300022	143.999	0.432029	0.234004	5.99991	1.40401	0	149.999	0.41667	0	0
-175.236	12.042		-80.538	-168.69	0	30.414	10.198	0	1	0	0.00599979	90.0006	0.539985	0.179999	6.00001	1.08	0	96.0007	0.666662	0	0
0.000	0.000		-73.301	-170.538	0	208.806	54.745	0	1	0	0.0107998	600	6.4799	0.216007	26.9992	5.83202	0	627	0.0999999	0	0
-77.602	118.770		-74.233	-170.311	0	176.647	41.593	0	1	0	0.0101646	510.002	5.18396	0.210852	21.0003	4.42797	0	531.002	0.117647	0	0
-175.684	26.575		-83.918	0	0	122.691	0	0	0	0	0.00383585	366.001	1.40393		0	0	0	366.001	0		0
0.000	0.000		-79.472	-171.703	0	229.87	48.508	0	1	0	0.0066904	678.001	4.5361	0.246861	20.9998	5.18403	0	699.001	0.0884955	0	0
-85.236	36.125		-77.211	-170.134	0	334.293	93.381	0	1	0	0.00817172	977.999	7.99195	0.206996	48.001	9.936	0	1026	0.0613497	0	0
-174.806	11.045		-78.066	0	0	324.003	0	0	0	0	0.0076087	951	7.23588		0	0	0	951	0		0
0.000	0.000		-80.69	-175.101	0	123.628	35.128	0	1	0	0.00590167	365.999	2.16001	0.420008	8.99974	3.77996	0	374.998	0.163935	0	0
-81.747	66.185		-81.128	-169.695	0	207.483	44.721	0	1	0	0.00561942	615.002	3.45596	0.197997	24.0002	4.75196	0	639.002	0.0975607	0	0
-176.055	14.534		-84.005	-169.563	0	220.204	38.639	0	1	0	0.00378057	656.999	2.48384	0.195437	20.9989	4.10397	0	677.998	0.0913243	0	0
0.000	0.000		-82.266	-173.66	0	81.744	18.111	0	1	0	0.00488914	243.001	1.18807	0.32401	5.9999	1.94403	0	249.001	0.246912	0	0
-84.596	37.165		-84.401	0	0	51.245	0	0	0	0	0.00352919	153.002	0.539973		0	0	0	153.002	0		0
-176.820	9.014		-79.862	-172.875	-90	153.395	40.311	14	1	0	0.00643721	453	2.91606	0.288	14.9999	4.31997	42	468	0.13245	0	8.97436
0.000	0.000		-73.496	0	0	56.321	0	0	1	0	0.0106664	162.002	1.72798		0	0	0	162.002	0.370366		0
-78.690	119.827		-77.118	-171.469	0	228.758	60.671	0	1	0	0.00823319	669.001	5.50802	0.239993	27.0006	6.47997	0	696.002	0.0896859	0	0
-175.840	27.573		-76.31	-173.66	0	80.281	27.166	0	1	0	0.00876919	234.001	2.052	0.32401	8.99968	2.91598	0	243	0.256409	0	0
0.000	0.000		-82.405	-173.66	0	45.398	18.111	0	1	0	0.00480022	134.999	0.648027	0.32401	5.9999	1.94403	0	140.999	0.444447	0	0
-82.461	34.297		-81.703	-174.56	0	97.015	21.095	0	1	0	0.0052499	287.999	1.51197	0.378023	5.99963	2.268	0	293.998	0.208334	0	0
-171.254	6.576		-78.944	0	0	177.291	0	0	0	0	0.00703421	522.002	3.67187		0	0	0	522.002	0		0
0.000	0.000		-81.674	-167.471	0	41.437	9.22	0	1	0	0.00526851	123.001	0.648032	0.161997	6.00039	0.972047	0	129.001	0.487802	0	0
-83.758	32.191		-79.426	-175.426	0	76.295	25.08	0	1	0	0.0067203	224.998	1.51206	0.449992	6.00013	2.70001	0	230.998	0.266669	0	0
-170.910	12.659		-77.876	0	0	138.08	0	0	0	0	0.0077335	405.001	3.13207		0	0	0	405.001	0		0
0.000	0.000		-84.806	-172.648	0	38.659	15.628	0	1	0	0.00327245	115.501	0.377971	0.279014	5.9995	1.67395	0	121.5	0.519477	0	0
-82.763	31.753		-79.287	-164.055	0	18.828	7.28	0	1	0	0.00681072	55.4995	0.377992	0.126003	5.99976	0.75599	0	61.4993	1.08109	0	0
-171.870	10.607		-78.048	-176.348	0	46.679	15.699	0	1	0	0.00762051	137.001	1.04402	0.564034	2.9999	1.69205	0	140.001	0.437952	0	0
0.000	0.000		-77.136	-173.501	0	98.814	26.504	0	1	0	0.00822129	289.002	2.37597	0.316017	8.99964	2.84404	0	298.001	0.207611	0	0
-80.949	171.637		-74.507	-174.489	0	133.519	38.176	0	1	0	0.00997894	386.002	3.85189	0.373123	10.9989	4.10395	0	397.001	0.15544	0	0
-175.156	29.606		-85.365	-172.569	0	24.748	7.732	0	1	0	0.00291862	74.0012	0.215982	0.276015	2.99999	0.828043	0	77.0012	0.810798	0	0
0.000	0.000		-85.179	-166.504	0	27.765	8.57	0	1	0	0.00303629	83.0003	0.252013	0.149997	6.00013	0.900002	0	89.0004	0.722889	0	0
-75.396	73.371		-78.311	-173.29	0	39.486	11.411	0	1	0	0.00744803	116.001	0.863982	0.305992	3.99992	1.22395	0	120.001	0.517235	0	0
-175.515	25.578		-80.762	-171.254	0	168.181	39.459	0	1	0	0.00585523	497.999	2.9159	0.234004	17.9997	4.21202	0	515.999	0.120482	0	0
0.000	0.000		-77.391	-173.991	0	77.878	28.657	0	1	0	0.00805288	227.999	1.83605	0.342	8.99985	3.07795	0	236.999	0.263159	0	0
-81.870	49.497		-82.528	-172.875	0	41.015	10.75	0	1	0	0.00472159	122	0.576035	0.288	4.00011	1.15203	0	126	0.491803	0	0
-178.210	16.008		-85.073	-174.56	0	19.405	7.032	0	1	0	0.00310338	57.9999	0.179996	0.378023	1.99997	0.756035	0	59.9999	1.03448	0	0
0.000	0.000		-84.428	-173.884	0	54.926	9.387	0	1	0	0.00351207	163.999	0.575977	0.335972	3.00032	1.00803	0	167	0.365855	0	0
-73.780	28.640		-84.428	-176.987	0	13.732	6.342	0	1	0	0.00351207	41.0013	0.144	0.683951	1.00005	0.683989	0	42.0014	1.46337	0	0
-171.469	10.112		-79.709	0	0	125.011	0	0	0	0	0.00653646	369	2.41196		0	0	0	369	0		0
0.000	0.000		-80.134	-174.611	0	116.726	26.618	0	1	0	0.00626099	344.999	2.16004	0.381622	7.49966	2.86204	0	352.499	0.173913	0	0
-81.384	16.688		-78.779	0	0	251.813	0	0	1	1	0.0071419	740.998	5.29214		0	0	0	740.998	0.0809719		0
-175.914	7.018		-73.61	-175.711	0	44.3	20.056	0	1	0	0.0105885	127.499	1.35003	0.480017	4.4998	2.15998	0	131.999	0.470591	0	0
0.000	0.000		-77.196	-173.387	0	124.086	34.731	0	1	0	0.00818163	363.001	2.96995	0.310522	11.9991	3.72599	0	375.001	0.165289	0	0
-79.972	83.272		-80.74	-173.66	0	46.607	13.583	0	1	0	0.00586942	137.999	0.809974	0.32401	4.49984	1.45799	0	142.499	0.434786	0	0
-171.027	19.235		-84.434	-172.694	0	118.559	19.66	0	1	0	0.00350826	354	1.24193	0.28079	7.5004	2.10604	0	361.5	0.169492	0	0
0.000	0.000		-82.147	-173.418	0	29.275	13.086	0	1	0	0.00496531	87.0014	0.431989	0.311997	4.49995	1.40397	0	91.5013	0.689644	0	0
-79.136	50.403		-80.426	-169.695	0	42.086	11.18	0.5	1	0	0.00607214	124.499	0.755978	0.197997	5.99991	1.18796	0	130.499	0.48193	0	0
-173.660	4.528		-78.857	-172.147	0	67.268	14.637	0	1	0	0.00709097	198	1.40401	0.26101	5.99965	1.56597	0	203.999	0.303031	0	0
0.000	0.000		-75.859	0	0	198.516	0	0	0	0	0.00906996	577.501	5.23792		0	0	0	577.501	0		0
-77.989	72.078		-85.515	-176.987	0	17.052	6.342	0	1	0	0.00282378	50.9994	0.144011	0.683951	1.00005	0.683989	0	51.9994	1.17649	0	0
-176.186	22.550		-83.726	-171.254	0	64.05	8.769	0	1	0	0.0039579	190.999	0.755956	0.234004	4.00009	0.93604	0	194.999	0.314138	0	0
0.000	0.000		-81.027	-171.469	0	25.647	6.741	0	1	0	0.00568445	75.9994	0.432015	0.239993	2.99997	0.719973	0	78.9994	0.78948	0	0
-81.060	45.047		-81.495	-172.763	0	108.19	21.169	0	1	0	0.00538344	321.001	1.72809	0.283497	8.00022	2.26804	0	329.001	0.186915	0	0
-173.157	12.590		-86.055	-170.538	0	48.448	6.083	0	1	0	0.00248264	145	0.359982	0.216007	3.00002	0.648026	0	148	0.413794	0	0
0.000	0.500		-81.302	-175.684	0	90.373	17.717	0	1	0	0.00550748	268.001	1.47601	0.477003	3.99999	1.90801	0	272.001	0.22388	0	0
-79.261	29.517		-79.984	-170.352	0	130.32	33.812	0	1	0	0.00635813	385.001	2.44789	0.211766	17.0001	3.60005	0	402.002	0.155844	0	0
-172.235	11.102		-75.875	-171.87	0	77.854	21.213	0	1	0	0.00905927	226.5	2.05193	0.252003	8.9998	2.26798	0	235.5	0.2649	0	0
0.000	0.000		-79.765	-169.875	0	24.388	9.481	0	1	0	0.00650012	71.9998	0.468008	0.201593	5.00017	1.008	0	76.9999	0.833336	0	0
-81.870	14.142		-76.37	0	0	171.154	0	0	0	0	0.00872926	499.002	4.35592		0	0	0	499.002	0		0
-171.870	7.071		-83.501	-169.38	0	26.504	5.426	0	1	0	0.00410104	79.001	0.323987	0.191993	2.99995	0.57597	0	82.001	0.759484	0	0
0.000	0.000		-82.439	-176.009	0	227.982	28.736	0	1	1	0.00477848	677.999	3.23981	0.515988	6.00006	3.09596	0	683.999	0.0884957	9.9999	0
-81.373	73.330		-77.282	-169.216	0	295.244	64.133	0	1	0	0.00812483	864.001	7.01987	0.189005	35.9992	6.80404	0	900	0.0694444	0	0
-171.870	14.142		-77.156	0	0	256.416	0	0	0	0	0.00820807	750.001	6.15606		0	0	0	750.001	0		0
0.000	0.000		-83.66	-172.405	0	54.332	15.133	0	1	0	0.00399987	161.999	0.647977	0.269987	6.00038	1.62003	0	168	0.370372	0	0
-81.416	214.401		-83.797	-176.186	0	92.542	15.033	0	1	0	0.00391275	276.001	1.07992	0.54001	2.99988	1.61997	0	279	0.217391	0	0
-170.106	43.649		-86.424	-167.471	0	96.187	9.22	0	1	0	0.00224979	287.999	0.647937	0.161997	6.00039	0.972047	0	294	0.208334	0	0
0.000	0.000		-78.69	0	0	86.683	0	0	0	0	0.00720004	254.999	1.836		0	0	0	254.999	0		0
-75.671	189.908		-83.418	-170.538	0	26.173	18.248	0	1	0	0.00415388	78.0015	0.324009	0.216007	8.99955	1.94397	0	87.001	0.769216	0	0
-170.538	42.579		-77.344	0	0	292.098	0	0	0	0	0.0080839	855.003	6.91176		0	0	0	855.003	0		0
0.000	0.000		-87.274	-168.69	0	21.024	5.099	0	1	0	0.00171409	63.0006	0.107989	0.179999	3.00001	0.539998	0	66.0006	0.952371	0	0
-77.989	48.052		-84.806	-170.538	0	11.045	6.083	0	1	0	0.00327245	32.9989	0.107988	0.216007	3.00002	0.648026	0	35.999	1.81824	0	0
-175.236	12.042		-79.257	-173.418	0	257.513	26.173	0	1	0	0.00683025	758.999	5.18416	0.311997	9.00025	2.80805	0	767.999	0.0790515	0	0
0.000	0.000		-77.879	-165.069	0	152.398	31.048	0	1	0	0.00773153	447.001	3.45601	0.135004	23.9991	3.23997	0	471.001	0.134228	0	0
-76.519	150.137		-75.285	0	0	204.714	0	0	0	0	0.00945449	593.999	5.61596		0	0	0	593.999	0		0
-170.789	37.483		-77.583	-170.538	0	111.611	36.497	0	1	0	0.0079263	327.001	2.59191	0.216007	17.9996	3.88805	0	345	0.183486	0	0
0.000	0.000		-87.207	-170.538	0	41.049	12.166	0	1	0	0.00175628	123.001	0.216024	0.216007	6.00003	1.29605	0	129.001	0.487802	0	0
-80.947	184.296		-78.69	-175.914	0	50.99	14.036	0	1	0	0.00720004	149.999	1.08	0.503952	3.00035	1.51203	0	153	0.400002	0	0
-170.134	46.690		-80.248	-172.235	0	64.938	22.204	0	1	0	0.00618722	191.999	1.18794	0.264005	8.99997	2.37604	0	200.999	0.312502	0	0
0.000	0.000		-76.684	-173.418	0	173.669	52.345	0	1	0	0.00852065	507	4.31997	0.311997	18.0001	5.616	0	525	0.118343	0	0
-77.276	63.561		-81.741	-176.82	0	62.65	18.028	0	1	0	0.00522552	186.001	0.971952	0.647965	3.0002	1.94403	0	189.001	0.322579	0	0
-167.905	14.318		-85.486	-176.424	0	19.059	8.016	0	1	0	0.00284211	56.9996	0.161999	0.576053	1.49993	0.864042	0	58.4996	1.05264	0	0
0.000	0.000		-77.106	-171.87	0	42.573	10.607	0	1	0	0.00824112	124.499	1.02601	0.252003	4.50011	1.13404	0	128.999	0.481933	0	0
-77.471	18.439		-75.062	-170.096	0	261.85	63.953	0	1	0	0.00960442	759.003	7.28979	0.206186	32.9993	6.80399	0	792.002	0.0790511	0	0
-167.471	9.220		-74.846	-175.03	0	149.188	46.174	0	1	0	0.00974994	432.001	4.21199	0.413978	12.0007	4.96804	0	444.001	0.138889	0	0
0.000	0.000		-84.024	-162.646	0	364.984	67.052	0	1	0	0.0037685	1089	4.10391	0.1152	59.9997	6.91198	0	1149	0.0550963	0	0
-80.538	42.579		-79.461	-169.992	0	87.476	34.525	0	1	0	0.00669755	258.001	1.72798	0.203999	17.9999	3.67196	0	276.001	0.232557	0	0
-171.254	13.153		-77.295	0	0	281.902	0	0	0	0	0.00811624	824.999	6.6959		0	0	0	824.999	0		0
0.000	0.000
-80.910	50.636
-171.870	14.142
0.000	0.000
-76.657	160.328
-172.093	36.346
0.000	0.000
-79.380	48.836
-169.992	17.263
0.000	0.000
-80.395	65.924
-169.992	17.263
0.000	0.000
-78.579	202.000
0.000	0.000
0.000	0.000
-78.742	215.139
-170.311	41.593
0.000	0.000
-79.380	16.279
-170.538	6.083
0.000	0.000
-79.509	109.836
0.000	0.000
0.000	0.000
-78.193	180.826
-172.504	38.328
0.000	0.000
-78.768	143.753
-174.685	43.186
0.000	0.000
-81.973	78.772
-172.648	31.257
0.000	0.000
-76.931	114.978
-171.634	34.366
0.000	0.000
-77.619	41.976
-173.290	17.117
0.000	0.000
-74.745	79.812
-170.538	24.331
0.000	0.000
-75.379	47.539
-165.964	20.616
0.000	0.000
-80.981	127.577
-176.424	16.031
0.000	0.000
-77.471	64.537
0.000	0.000
0.000	0.000
-78.291	98.551
-173.558	31.197
0.000	0.000
-81.027	38.471
-175.601	13.038
0.000	0.000
-78.447	184.743
-172.569	46.390
0.000	0.000
-81.193	107.771
-171.703	24.254
0.000	0.000
-80.042	66.502
-170.727	24.824
0.000	0.000
-79.315	107.870
-170.218	29.428
0.000	0.000
-76.264	92.650
-175.764	27.074
0.000	2.000
-77.276	63.561
-173.157	25.179
0.000	0.000
-74.650	158.660
-172.030	50.488
0.000	1.000
-77.605	93.172
-174.094	29.155
0.000	0.000
-78.690	30.594
-175.236	12.042
0.000	1.000
-74.914	119.105
0.000	0.000
0.000	0.000
-74.320	59.203
-174.806	22.091
0.000	0.000
-79.695	22.361
-165.964	12.369
0.000	0.000
-74.962	208.127
0.000	0.000
0.000	0.000
-76.386	131.700
-171.469	40.447
0.000	0.000
-76.715	221.939
0.000	0.000
0.000	0.000
-79.011	52.462
-173.418	26.173
0.000	0.000
-74.226	91.963
-170.538	30.414
0.000	0.000
-75.710	109.385
-172.983	32.745
0.000	0.000
-80.647	86.145
-177.510	23.022
0.000	0.000
-75.964	28.862
-170.538	12.166
0.000	0.000
-85.365	37.121
-174.289	10.050
0.000	0.000
-74.854	137.786
0.000	0.000
0.000	0.000
-81.809	66.680
-173.480	17.614
0.000	0.000
-77.672	154.564
-172.461	34.297
0.000	0.000
-81.469	50.559
-171.119	16.194
0.000	0.500
-78.805	97.862
-172.648	31.257
0.000	0.000
-82.539	84.717
-167.471	18.439
0.000	1.000
-81.158	182.165
-168.690	35.693
-90.000	1.000
-78.887	57.070
-171.870	14.142
0.000	0.000
-79.778	123.968
0.000	0.000
0.000	0.000
-81.870	21.213
180.000	7.000
0.000	0.000
-84.806	22.091
-164.055	7.280
-90.000	1.000
-76.675	117.154
0.000	0.000
0.000	0.000
-84.094	58.310
-173.660	18.111
0.000	0.000
-76.486	239.635
-166.809	65.734
0.000	0.000
-82.030	50.488
-168.690	20.396
0.000	0.000
-72.284	75.584
-174.560	21.095
0.000	0.000
-82.875	16.125
-173.660	9.055
0.000	0.000
-77.642	60.741
-172.875	21.499
0.000	0.000
-77.253	104.236
-173.811	27.829
0.000	0.333
-78.551	53.736
-173.797	15.424
0.000	0.000
-79.603	36.940
-168.179	14.644
0.000	0.000
-77.661	32.757
-170.961	22.277
0.000	0.000
-80.340	47.676
-170.538	12.166
0.000	0.000
-80.910	25.318
-172.405	7.566
0.000	0.000
-80.327	44.635
-172.648	15.628
0.000	0.000
-77.646	177.613
0.000	0.000
0.000	0.000
-79.992	17.263
-173.660	9.055
0.000	0.000
-76.538	266.317
0.000	0.000
0.000	0.000
-76.643	112.544
-176.055	29.069
0.000	0.000
-77.634	95.721
0.000	0.000
0.000	0.000
-75.797	111.405
-175.657	26.409
0.000	0.000
-78.486	82.663
0.000	0.000
0.000	0.000
-77.042	115.953
-173.418	26.173
0.000	0.000
-78.805	97.862
-172.147	29.275
0.000	0.000
-78.546	156.109
-171.870	42.426
0.000	0.000
-82.235	44.407
-169.695	11.180
0.000	0.000
-78.805	97.862
-175.601	26.077
0.000	0.000
-79.144	148.661
-173.480	35.228
0.000	0.000
-85.914	28.071
-171.254	6.576
0.000	0.000
-84.289	65.324
-170.538	15.207
0.000	0.000
-84.359	40.697
-171.027	9.618
-90.000	11.500
-77.167	132.818
-169.992	34.525
-90.000	10.000
-83.797	23.135
-175.236	6.021
0.000	0.000
-82.648	15.628
-176.186	7.517
0.000	0.000
-83.047	20.652
-174.289	5.025
0.000	0.000
-84.237	54.777
-172.569	11.597
0.000	0.000
-74.944	88.540
-175.236	30.104
90.000	0.500
-73.301	36.541
-175.236	12.042
0.000	0.000
-75.069	108.669
-169.875	28.443
0.000	0.000
-76.142	233.805
0.000	0.000
0.000	0.000
-83.991	38.210
-172.875	12.093
0.000	0.000
-82.753	87.197
-176.730	17.529
0.000	0.000
-86.987	9.513
180.000	4.000
0.000	0.000
-82.117	32.810
-172.235	11.102
0.000	0.000
-71.238	166.339
0.000	0.000
0.000	0.000
-76.651	181.915
-171.416	53.600
0.000	0.000
-78.111	38.833
0.000	0.000
0.000	0.000
-77.574	120.830
-174.289	30.150
0.000	0.000
-81.384	16.688
-171.870	7.071
0.000	0.000
-80.961	22.277
-171.254	6.576
0.000	0.000
-75.538	114.116
0.000	0.000
0.000	0.000
-78.218	83.254
-173.157	25.179
0.000	0.000
-86.682	138.232
-174.560	21.095
0.000	0.000
-76.527	98.717
-172.875	32.249
0.000	0.000
-76.866	61.612
-173.290	17.117
0.000	0.000
-83.797	185.084
-171.573	27.295
0.000	0.000
-80.362	53.759
-175.236	12.042
0.000	0.000
-77.978	110.422
-175.236	24.083
0.000	0.000
-80.322	130.863
-172.405	30.265
0.000	2.000
-77.593	102.391
-173.418	26.173
0.000	0.000
-80.272	35.511
-170.538	12.166
0.000	0.000
-78.465	50.010
0.000	0.000
0.000	0.000
-79.854	96.509
-174.289	20.100
0.000	0.000
-76.667	177.792
0.000	0.000
0.000	0.000
-79.808	180.854
-176.634	34.059
0.000	0.000
-76.192	121.511
-171.384	33.377
0.000	0.000
-79.935	234.610
-171.416	53.600
0.000	0.000
-80.218	73.570
-175.515	25.578
0.000	0.000
-76.402	174.388
-168.906	51.971
0.000	0.500
-85.135	23.585
-165.069	7.762
0.000	0.000
-84.753	49.206
0.000	0.000
0.000	0.000
-86.309	31.064
-177.138	20.025
0.000	0.000
-85.179	333.179
-173.774	55.326
0.000	0.000
-77.949	182.011
-172.185	51.478
0.000	0.000
-74.476	56.045
0.000	0.000
0.000	0.000
-85.236	48.166
-171.254	13.153
0.000	0.000
-80.538	30.414
-168.690	10.198
0.000	0.000
-73.301	208.806
-170.538	54.745
0.000	0.000
-74.233	176.647
-170.311	41.593
0.000	0.000
-83.918	122.691
0.000	0.000
0.000	0.000
-79.472	229.870
-171.703	48.508
0.000	0.000
-77.211	334.293
-170.134	93.381
0.000	0.000
-78.066	324.003
0.000	0.000
0.000	0.000
-80.690	123.628
-175.101	35.128
0.000	0.000
-81.128	207.483
-169.695	44.721
0.000	0.000
-84.005	220.204
-169.563	38.639
0.000	0.000
-82.266	81.744
-173.660	18.111
0.000	0.000
-84.401	51.245
0.000	0.000
0.000	0.000
-79.862	153.395
-172.875	40.311
-90.000	14.000
-73.496	56.321
0.000	0.000
0.000	0.000
-77.118	228.758
-171.469	60.671
0.000	0.000
-76.310	80.281
-173.660	27.166
0.000	0.000
-82.405	45.398
-173.660	18.111
0.000	0.000
-81.703	97.015
-174.560	21.095
0.000	0.000
-78.944	177.291
0.000	0.000
0.000	0.000
-81.674	41.437
-167.471	9.220
0.000	0.000
-79.426	76.295
-175.426	25.080
0.000	0.000
-77.876	138.080
0.000	0.000
0.000	0.000
-84.806	38.659
-172.648	15.628
0.000	0.000
-79.287	18.828
-164.055	7.280
0.000	0.000
-78.048	46.679
-176.348	15.699
0.000	0.000
-77.136	98.814
-173.501	26.504
0.000	0.000
-74.507	133.519
-174.489	38.176
0.000	0.000
-85.365	24.748
-172.569	7.732
0.000	0.000
-85.179	27.765
-166.504	8.570
0.000	0.000
-78.311	39.486
-173.290	11.411
0.000	0.000
-80.762	168.181
-171.254	39.459
0.000	0.000
-77.391	77.878
-173.991	28.657
0.000	0.000
-82.528	41.015
-172.875	10.750
0.000	0.000
-85.073	19.405
-174.560	7.032
0.000	0.000
-84.428	54.926
-173.884	9.387
0.000	0.000
-84.428	13.732
-176.987	6.342
0.000	0.000
-79.709	125.011
0.000	0.000
0.000	0.000
-80.134	116.726
-174.611	26.618
0.000	0.000
-78.779	251.813
0.000	0.000
0.000	0.000
-73.610	44.300
-175.711	20.056
0.000	0.000
-77.196	124.086
-173.387	34.731
0.000	0.000
-80.740	46.607
-173.660	13.583
0.000	0.000
-84.434	118.559
-172.694	19.660
0.000	0.000
-82.147	29.275
-173.418	13.086
0.000	0.000
-80.426	42.086
-169.695	11.180
0.000	0.500
-78.857	67.268
-172.147	14.637
0.000	0.000
-75.859	198.516
0.000	0.000
0.000	0.000
-85.515	17.052
-176.987	6.342
0.000	0.000
-83.726	64.050
-171.254	8.769
0.000	0.000
-81.027	25.647
-171.469	6.741
0.000	0.000
-81.495	108.190
-172.763	21.169
0.000	0.000
-86.055	48.448
-170.538	6.083
0.000	0.000
-81.302	90.373
-175.684	17.717
0.000	0.000
-79.984	130.320
-170.352	33.812
0.000	0.000
-75.875	77.854
-171.870	21.213
0.000	0.000
-79.765	24.388
-169.875	9.481
0.000	0.000
-76.370	171.154
0.000	0.000
0.000	0.000
-83.501	26.504
-169.380	5.426
0.000	0.000
-82.439	227.982
-176.009	28.736
0.000	0.000
-77.282	295.244
-169.216	64.133
0.000	0.000
-77.156	256.416
0.000	0.000
0.000	0.000
-83.660	54.332
-172.405	15.133
0.000	0.000
-83.797	92.542
-176.186	15.033
0.000	0.000
-86.424	96.187
-167.471	9.220
0.000	0.000
-78.690	86.683
0.000	0.000
0.000	0.000
-83.418	26.173
-170.538	18.248
0.000	0.000
-77.344	292.098
0.000	0.000
0.000	0.000
-87.274	21.024
-168.690	5.099
0.000	0.000
-84.806	11.045
-170.538	6.083
0.000	0.000
-79.257	257.513
-173.418	26.173
0.000	0.000
-77.879	152.398
-165.069	31.048
0.000	0.000
-75.285	204.714
0.000	0.000
0.000	0.000
-77.583	111.611
-170.538	36.497
0.000	0.000
-87.207	41.049
-170.538	12.166
0.000	0.000
-78.690	50.990
-175.914	14.036
0.000	0.000
-80.248	64.938
-172.235	22.204
0.000	0.000
-76.684	173.669
-173.418	52.345
0.000	0.000
-81.741	62.650
-176.820	18.028
0.000	0.000
-85.486	19.059
-176.424	8.016
0.000	0.000
-77.106	42.573
-171.870	10.607
0.000	0.000
-75.062	261.850
-170.096	63.953
0.000	0.000
-74.846	149.188
-175.030	46.174
0.000	0.000
-84.024	364.984
-162.646	67.052
0.000	0.000
-79.461	87.476
-169.992	34.525
0.000	0.000
-77.295	281.902
0.000	0.000
0.000	0.000

[truncated: 29 more sheets: 210207_12uM_3s_HCP_alone_011, 210215_HCP1_004, 210302_HCP1_12uM_3s_003, 210207_12uM_3s_CLS2_007, 210219_12uM_3s_CLS2_004, 210302_CLS2_12uM_3s_002, 210310_12uM_CLS2_3s_006, 210310_12uM_CLS2_3s_004, 210321_CLS2, 210321_CLS2_2, 210304_BUB1_HCP_001, 210215_BUB1_HCP1_002, 210215_BUB1_HCP1_005, 210219_CLS2_BUB1_3s_005, 210219_CLS2_BUB1_3s_006, 210310_12uM_CLS2_BUB1_3s_005, 210207_12uM_3s_CLS2_HCP_005, 210302_HCP1_CLS2_12u, 210304_12uM_3s_CLS2_HCP1_002, 210219_12uM_3s_BUB_HCP_CLS2_007 …]
