# Supplementary material for: Synergistic stabilization of microtubules by BUB-1, HCP-1, and CLS-2 controls microtubule pausing and meiotic spindle assembly
Source: eLife. 2023 Feb 17;12:e82579. doi: 10.7554/eLife.82579 (PMC10005782; doi:10.7554/eLife.82579)
Supplement: Figure 6—source data 2. — Processed data for the analysis of microtubule dynamics. Details of statistical analyses are provided. [file elife-82579-fig6-data2.xlsx]

## Sheet: Growth
Growth rate (µm/min) per microtubule											Descriptive statistics
CTRL	BUB-1	HCP-1	CLS-2	CLS-2R970A	BUB-1+HCP-1	BUB-1+CLS-2	HCP-1+CLS-2	BUB-1+HCP-1+CLS-2	BUB-1+HCP-1+CLS-2R970A			CTRL	BUB-1	HCP-1	CLS-2	CLS-2R970A	BUB-1+HCP-1	BUB-1+CLS-2	HCP-1+CLS-2	BUB-1+HCP-1+CLS-2	BUB-1+HCP-1+CLS-2R970A		ANOVA summary
0.909475	0.839999	0.963451	1.54286	1.08	1.02316	1.08	1.39764	1.00097	1.23429		Number of values	1902	563	969	1348	772	855	482	592	741	222		F	260.1
0.771427	0.687271	0.937356	1.36421	1.056	0.991059	0.893791	1.2662	0.945	1.11086														P value	<0,0001
0.762351	0.678347	0.913845	1.04516	0.955385	0.925714	0.863999	1.11903	0.863999	1.08		Minimum	0.057	0.11	0.2	0.069	0.04	0.077	0.13	0.16	0.2	0.34		P value summary	****
0.719997	0.637377	0.904863	0.941539	0.950399	0.909475	0.822858	1.08	0.849836	1.05923		25% Percentile	0.45	0.44	0.6	0.38	0.4	0.45	0.45	0.47	0.51	0.56		Significant diff. among means (P < 0.05)?	Yes
0.719997	0.631169	0.900001	0.925714	0.94829	0.905807	0.815092	1.08	0.814425	1.03562		Median	0.53	0.51	0.71	0.46	0.49	0.54	0.54	0.56	0.61	0.68		R squared	0.2172
0.715133	0.628363	0.897661	0.900001	0.931033	0.816001	0.787763	0.988473	0.768814	1.024		75% Percentile	0.61	0.58	0.86	0.54	0.6	0.62	0.63	0.66	0.72	0.78
0.688351	0.599999	0.896605	0.868695	0.91011	0.797251	0.785453	0.987429	0.763903	1.01721		Maximum	1.2	1.2	1.6	1.5	1.1	1.3	1.1	1.4	1.4	1.2		Brown-Forsythe test
0.687271	0.595863	0.892175	0.839999	0.906206	0.79291	0.773332	0.945	0.759452	0.99692		Range	1.1	1.1	1.4	1.5	1	1.2	0.95	1.3	1.2	0.89		F (DFn, DFd)	37,11 (9, 8436)
0.664614	0.590309	0.891429	0.825169	0.855849	0.785453	0.755997	0.935999	0.742499	0.981819														P value	<0,0001
0.661223	0.58909	0.883634	0.8208	0.854144	0.779999	0.744827	0.925714	0.741816	0.971997		95% CI of median												P value summary	****
0.659998	0.581538	0.879997	0.809997	0.842691	0.771427	0.738947	0.900001	0.741176	0.970787		Actual confidence level	95%	96%	95%	95%	95%	95%	96%	96%	95%	96%		Are SDs significantly different (P < 0.05)?	Yes
0.659998	0.568422	0.879997	0.785453	0.840542	0.755997	0.719997	0.889409	0.737823	0.967164		Lower confidence limit	0.53	0.5	0.7	0.45	0.48	0.53	0.52	0.55	0.59	0.64
0.647998	0.565714	0.879197	0.7776	0.833682	0.746181	0.715133	0.885246	0.732855	0.925714		Upper confidence limit	0.54	0.52	0.73	0.47	0.5	0.55	0.56	0.58	0.62	0.71		Bartlett's test
0.639361	0.55604	0.875675	0.762351	0.830768	0.744827	0.708196	0.883634	0.728275	0.917999														Bartlett's statistic (corrected)	396.8
0.639361	0.550187	0.873191	0.762351	0.818182	0.73014	0.706351	0.848569	0.719997	0.902687		Mean	0.53	0.51	0.73	0.47	0.5	0.54	0.54	0.58	0.62	0.68		P value	<0,0001
0.637377	0.546206	0.871578	0.732203	0.816872	0.727826	0.701605	0.841557	0.713301	0.900806		Std. Deviation	0.13	0.13	0.2	0.13	0.15	0.14	0.13	0.17	0.16	0.15		P value summary	****
0.629999	0.539998	0.855444	0.698822	0.809997	0.719997	0.698181	0.826668	0.703256	0.898687		Std. Error of Mean	0.0029	0.0054	0.0065	0.0036	0.0052	0.0048	0.0061	0.0068	0.006	0.01		Are SDs significantly different (P < 0.05)?	Yes
0.629999	0.533545	0.850393	0.68	0.809997	0.7128	0.694285	0.812673	0.702001	0.892175
0.617142	0.531694	0.847464	0.676625	0.803305	0.710526	0.693724	0.809997	0.696774	0.887999		Lower 95% CI of mean	0.53	0.5	0.72	0.46	0.49	0.53	0.53	0.57	0.61	0.66		ANOVA table	SS	DF	MS	F (DFn, DFd)	P value
0.608617	0.529327	0.846485	0.670346	0.802283	0.70691	0.684876	0.809997	0.696774	0.884818		Upper 95% CI of mean	0.54	0.52	0.74	0.48	0.51	0.55	0.55	0.59	0.63	0.7		Treatment (between columns)	51.85	9	5.761	F (9, 8436) = 260,1	P<0,0001
0.604196	0.522195	0.844138	0.665864	0.799998	0.703256	0.682695	0.809997	0.696199	0.879997														Residual (within columns)	186.8	8436	0.02215
0.60279	0.519068	0.841766	0.65739	0.794117	0.702001	0.679719	0.798262	0.694285	0.86961		Coefficient of variation	24%	25%	28%	28%	29%	26%	25%	29%	27%	22%		Total	238.7	8445
0.601965	0.516521	0.83613	0.647998	0.791452	0.700538	0.668569	0.785453	0.693724	0.867613
0.597445	0.508234	0.834544	0.647998	0.779014	0.697498	0.667223	0.782066	0.687271	0.863999		Geometric mean	0.52	0.49	0.7	0.45	0.48	0.52	0.52	0.56	0.6	0.67		Multiple comparision
0.592566	0.505947	0.834059	0.647998	0.772843	0.697398	0.666847	0.7776	0.687271	0.863999		Geometric SD factor	1.3	1.3	1.3	1.4	1.4	1.3	1.3	1.3	1.3	1.3		Number of families	1
0.58909	0.499699	0.833682	0.643402	0.771427	0.694285	0.664614	0.768814	0.686354	0.858459														Number of comparisons per family	45
0.58909	0.494999	0.82653	0.640001	0.768814	0.694285	0.660703	0.762351	0.685715	0.854327		Lower 95% CI of geo. mean	0.51	0.48	0.69	0.44	0.47	0.51	0.51	0.55	0.59	0.65		Alpha	0.01
0.58909	0.487743	0.82174	0.640001	0.764306	0.694285	0.659998	0.759999	0.673244	0.84954		Upper 95% CI of geo. mean	0.52	0.5	0.72	0.46	0.49	0.53	0.54	0.57	0.61	0.69
0.582857	0.483157	0.820252	0.635292	0.763309	0.693724	0.658198	0.754952	0.673244	0.847999														Tukey's multiple comparisons test	Mean Diff,	95,00% CI of diff,	Significant?	Summary	Adjusted P Value
0.576984	0.476472	0.817298	0.632196	0.751303	0.687271	0.656591	0.753489	0.671999	0.847851		Sum	1014	287	709	632	388	462	260	344	460	151		CTRL vs. BUB-1	0.02318	0,0005892 to 0,04578	No	*	0.0388	A-B
0.57306	0.461124	0.813913	0.629999	0.747692	0.679549	0.652076	0.744827	0.670346	0.836533														CTRL vs. HCP-1	-0.1985	-0,2171 to -0,1799	Yes	****	<0,0001	A-C
0.571765	0.45	0.809997	0.628862	0.742499	0.676625	0.649913	0.735319	0.669028	0.83613														CTRL vs. CLS-2	0.06429	0,04752 to 0,08106	Yes	****	<0,0001	A-D
0.570567	0.428106	0.809997	0.628862	0.742499	0.674998	0.647998	0.732855	0.66804	0.834544														CTRL vs. CLS-2R970A	0.0313	0,01120 to 0,05139	Yes	****	<0,0001	A-E
0.570567	0.427922	0.806267	0.628363	0.741816	0.671999	0.645771	0.72637	0.663895	0.829089														CTRL vs. BUB-1+HCP-1	-0.006928	-0,02632 to 0,01246	No	ns	0.9816	A-F
0.568422	0.418774	0.806198	0.625261	0.739726	0.671069	0.640551	0.72637	0.663895	0.828492														CTRL vs. BUB-1+CLS-2	-0.007039	-0,03105 to 0,01698	No	ns	0.9956	A-G
0.561176	0.410401	0.803944	0.622079	0.735319	0.670346	0.640354	0.719997	0.661223	0.818182														CTRL vs. HCP-1+CLS-2	-0.04694	-0,06910 to -0,02477	Yes	****	<0,0001	A-H
0.557419		0.799998	0.617142	0.731207	0.669875	0.638607	0.719997	0.659541	0.816583														CTRL vs. BUB-1+HCP-1+CLS-2	-0.08736	-0,1078 to -0,06696	Yes	****	<0,0001	A-I
0.557419	1.23429	0.79579	0.617142	0.727348	0.662728	0.635804	0.708196	0.65739	0.814425														CTRL vs. BUB-1+HCP-1+CLS-2R970A	-0.1486	-0,1820 to -0,1152	Yes	****	<0,0001	A-J
0.556563	1.188	0.795093	0.614888	0.719997	0.661223	0.633601	0.705742	0.656999	0.812475														BUB-1 vs. HCP-1	-0.2217	-0,2467 to -0,1967	Yes	****	<0,0001	B-C
0.550589	1.00286	0.794481	0.604797	0.719997	0.661223	0.632569	0.70484	0.656999	0.812475														BUB-1 vs. CLS-2	0.04111	0,01747 to 0,06474	Yes	****	<0,0001	B-D
0.549585	0.930461	0.793847	0.599223	0.719997	0.65898	0.629517	0.703256	0.656999	0.812028														BUB-1 vs. CLS-2R970A	0.008112	-0,01799 to 0,03421	No	ns	0.9932	B-E
0.547607	0.893791	0.792517	0.598809	0.71756	0.655714	0.629009	0.700851	0.656842	0.809997														BUB-1 vs. BUB-1+HCP-1	-0.03011	-0,05567 to -0,004552	Yes	**	0.0074	B-F
0.545934	0.883634	0.788571	0.595863	0.709411	0.653022	0.625261	0.698822	0.647998	0.809202														BUB-1 vs. BUB-1+CLS-2	-0.03022	-0,05945 to -0,0009986	No	*	0.0358	B-G
0.539998	0.863999	0.787499	0.58909	0.700538	0.6525	0.624579	0.696774	0.645196	0.806198														BUB-1 vs. HCP-1+CLS-2	-0.07012	-0,09784 to -0,04240	Yes	****	<0,0001	B-H
0.539998	0.842925	0.785453	0.586822	0.698822	0.650957	0.620687	0.694285	0.643973	0.804704														BUB-1 vs. BUB-1+HCP-1+CLS-2	-0.1105	-0,1369 to -0,08421	Yes	****	<0,0001	B-I
0.539998	0.839999	0.785453	0.584471	0.696774	0.650957	0.61881	0.694285	0.639185	0.802283														BUB-1 vs. BUB-1+HCP-1+CLS-2R970A	-0.1718	-0,2091 to -0,1344	Yes	****	<0,0001	B-J
0.539998	0.838207	0.785453	0.584471	0.693578	0.649757	0.617142	0.692306	0.638488	0.799998														HCP-1 vs. CLS-2	0.2628	0,2430 to 0,2826	Yes	****	<0,0001	C-D
0.539998	0.802283	0.778814	0.580297	0.686208	0.643402	0.617142	0.691874	0.637283	0.792277														HCP-1 vs. CLS-2R970A	0.2298	0,2071 to 0,2525	Yes	****	<0,0001	C-E
0.537759	0.790242	0.7776	0.577424	0.6853	0.643402	0.617142	0.69	0.636631	0.789605														HCP-1 vs. BUB-1+HCP-1	0.1916	0,1695 to 0,2137	Yes	****	<0,0001	C-F
0.535678	0.785453	0.7776	0.575999	0.682106	0.642163	0.617142	0.687271	0.626667	0.789605														HCP-1 vs. BUB-1+CLS-2	0.1915	0,1652 to 0,2177	Yes	****	<0,0001	C-G
0.534858	0.762351	0.77434	0.575999	0.682106	0.639472	0.617142	0.686117	0.625261	0.788246														HCP-1 vs. HCP-1+CLS-2	0.1516	0,1270 to 0,1761	Yes	****	<0,0001	C-H
0.530526	0.759999	0.77434	0.575999	0.680871	0.639185	0.616152	0.685507	0.62366	0.785453														HCP-1 vs. BUB-1+HCP-1+CLS-2	0.1112	0,08817 to 0,1341	Yes	****	<0,0001	C-I
0.529411	0.757894	0.773902	0.574678	0.680726	0.637713	0.6151	0.684644	0.619533	0.785453														HCP-1 vs. BUB-1+HCP-1+CLS-2R970A	0.04993	0,01489 to 0,08497	Yes	***	0.0003	C-J
0.528508	0.751303	0.772681	0.569873	0.678857	0.635292	0.614725	0.682106	0.617142	0.782173														CLS-2 vs. CLS-2R970A	-0.03299	-0,05425 to -0,01174	Yes	****	<0,0001	D-E
0.528508	0.749385	0.772047	0.568422	0.67814	0.635292	0.614481	0.678857	0.617142	0.780723														CLS-2 vs. BUB-1+HCP-1	-0.07122	-0,09181 to -0,05063	Yes	****	<0,0001	D-F
0.528508	0.747692	0.765256	0.568422	0.677648	0.625261	0.611682	0.674998	0.616364	0.780438														CLS-2 vs. BUB-1+CLS-2	-0.07133	-0,09632 to -0,04634	Yes	****	<0,0001	D-G
0.525788	0.742499	0.762351	0.566999	0.676174	0.623504	0.601043	0.674998	0.615968	0.7776														CLS-2 vs. HCP-1+CLS-2	-0.1112	-0,1344 to -0,08801	Yes	****	<0,0001	D-H
0.524746	0.741492	0.762351	0.566214	0.674572	0.622373	0.598992	0.674998	0.61519	0.768814														CLS-2 vs. BUB-1+HCP-1+CLS-2	-0.1516	-0,1732 to -0,1301	Yes	****	<0,0001	D-I
0.523959	0.740569	0.761312	0.565235	0.67439	0.622373	0.596983	0.668569	0.613332	0.766453														CLS-2 vs. BUB-1+HCP-1+CLS-2R970A	-0.2129	-0,2470 to -0,1788	Yes	****	<0,0001	D-J
0.523636	0.737562	0.755997	0.563479	0.671069	0.617142	0.596569	0.66804	0.612	0.762351														CLS-2R970A vs. BUB-1+HCP-1	-0.03822	-0,06161 to -0,01484	Yes	****	<0,0001	E-F
0.523636	0.735319	0.752728	0.561599	0.670346	0.615601	0.595863	0.665753	0.611564	0.760562														CLS-2R970A vs. BUB-1+CLS-2	-0.03834	-0,06568 to -0,01100	Yes	***	0.0004	E-G
0.515453	0.731077	0.748515	0.558879	0.666	0.614888	0.595863	0.664614	0.609231	0.758918														CLS-2R970A vs. HCP-1+CLS-2	-0.07823	-0,1040 to -0,05250	Yes	****	<0,0001	E-H
0.511577	0.719997	0.745485	0.558621	0.663157	0.612537	0.592939	0.662728	0.60845	0.758918														CLS-2R970A vs. BUB-1+HCP-1+CLS-2	-0.1187	-0,1429 to -0,09443	Yes	****	<0,0001	E-I
0.510236	0.719997	0.742499	0.556362	0.662068	0.610908	0.590941	0.659998	0.607189	0.757894														CLS-2R970A vs. BUB-1+HCP-1+CLS-2R970A	-0.1799	-0,2157 to -0,1440	Yes	****	<0,0001	E-J
0.510236	0.709712	0.742499	0.555429	0.659368	0.610074	0.590852	0.656072	0.606314	0.755997														BUB-1+HCP-1 vs. BUB-1+CLS-2	-0.000111	-0,02694 to 0,02671	No	ns	>0,9999	F-G
0.508799	0.700538	0.742499	0.555429	0.657819	0.609882	0.585632	0.651426	0.601043	0.755515														BUB-1+HCP-1 vs. HCP-1+CLS-2	-0.04001	-0,06519 to -0,01483	Yes	****	<0,0001	F-H
0.506667	0.694285	0.739891	0.555083	0.65739	0.609231	0.585001	0.650957	0.595863	0.755515														BUB-1+HCP-1 vs. BUB-1+HCP-1+CLS-2	-0.08043	-0,1041 to -0,05679	Yes	****	<0,0001	F-I
0.506547	0.6912	0.738947	0.553846	0.654545	0.609231	0.584382	0.649625	0.595384	0.755121														BUB-1+HCP-1 vs. BUB-1+HCP-1+CLS-2R970A	-0.1417	-0,1771 to -0,1062	Yes	****	<0,0001	F-J
0.505159	0.68	0.736939	0.553846	0.653446	0.608857	0.581793	0.647998	0.595384	0.751303														BUB-1+CLS-2 vs. HCP-1+CLS-2	-0.0399	-0,06879 to -0,01100	Yes	***	0.0005	G-H
0.505159	0.678857	0.734398	0.549473	0.653022	0.608727	0.580192	0.645771	0.595198	0.746666														BUB-1+CLS-2 vs. BUB-1+HCP-1+CLS-2	-0.08032	-0,1079 to -0,05276	Yes	****	<0,0001	G-I
0.503132	0.677648	0.731611	0.548309	0.652076	0.607998	0.579513	0.643402	0.590625	0.745413														BUB-1+CLS-2 vs. BUB-1+HCP-1+CLS-2R970A	-0.1415	-0,1797 to -0,1033	Yes	****	<0,0001	G-J
0.502325	0.674998	0.731077	0.54806	0.651619	0.607998	0.578572	0.643234	0.590503	0.744														HCP-1+CLS-2 vs. BUB-1+HCP-1+CLS-2	-0.04042	-0,06638 to -0,01446	Yes	****	<0,0001	H-I
0.50161	0.670346	0.726051	0.547201	0.648889	0.606575	0.575034	0.641248	0.58909	0.743608														HCP-1+CLS-2 vs. BUB-1+HCP-1+CLS-2R970A	-0.1016	-0,1387 to -0,06458	Yes	****	<0,0001	H-J
0.497897	0.669598	0.725254	0.543311	0.647998	0.604797	0.575034	0.640001	0.587077	0.742764														BUB-1+HCP-1+CLS-2 vs. BUB-1+HCP-1+CLS-2R970A	-0.06122	-0,09726 to -0,02519	Yes	****	<0,0001	I-J
0.496551	0.667636	0.719997	0.539998	0.647998	0.604285	0.574178	0.638181	0.585762	0.738947
0.496551	0.661223	0.719997	0.539998	0.644777	0.603529	0.57375	0.638181	0.585001	0.738														Test details	Mean 1	Mean 2	Mean Diff,	SE of diff,	n1	n2	q	DF
0.496551	0.660703	0.719997	0.539998	0.644371	0.60279	0.571765	0.638181	0.57818	0.73659														CTRL vs. BUB-1	0.5333	0.5101	0.02318	0.00714	1902	563	4.592	8436
0.496551	0.655282	0.719997	0.539998	0.643845	0.602306	0.571479	0.637853	0.577832	0.733586														CTRL vs. HCP-1	0.5333	0.7318	-0.1985	0.005874	1902	969	47.8	8436
0.496217	0.654545	0.719997	0.539998	0.642856	0.599999	0.569301	0.637201	0.577675	0.732203														CTRL vs. CLS-2	0.5333	0.469	0.06429	0.005299	1902	1348	17.16	8436
0.495999	0.652076	0.719997	0.539998	0.641248	0.598152	0.568422	0.636631	0.575999	0.73059														CTRL vs. CLS-2R970A	0.5333	0.502	0.0313	0.006351	1902	772	6.969	8436
0.495737	0.650957	0.71615	0.539998	0.640678	0.596841	0.568422	0.636279	0.573334	0.73014														CTRL vs. BUB-1+HCP-1	0.5333	0.5403	-0.006928	0.006128	1902	855	1.599	8436
0.495285	0.647998	0.71615	0.53647	0.640464	0.596569	0.561848	0.631382	0.571035	0.729728														CTRL vs. BUB-1+CLS-2	0.5333	0.5404	-0.007039	0.007589	1902	482	1.312	8436
0.491707	0.645516	0.713899	0.533493	0.639656	0.596569	0.560271	0.627096	0.565714	0.72935														CTRL vs. HCP-1+CLS-2	0.5333	0.5803	-0.04694	0.007004	1902	592	9.477	8436
0.491707	0.644777	0.713009	0.532985	0.637377	0.595863	0.556362	0.626086	0.564546	0.72637														CTRL vs. BUB-1+HCP-1+CLS-2	0.5333	0.6207	-0.08736	0.006445	1902	741	19.17	8436
0.49091	0.639185	0.711817	0.53143	0.637377	0.594001	0.551998	0.625261	0.564324	0.726206														CTRL vs. BUB-1+HCP-1+CLS-2R970A	0.5333	0.6819	-0.1486	0.01056	1902	222	19.91	8436
0.49091	0.637377	0.710886	0.52683	0.634129	0.592939	0.551488	0.622373	0.56219	0.72431														BUB-1 vs. HCP-1	0.5101	0.7318	-0.2217	0.007886	563	969	39.76	8436
0.486761	0.635292	0.708751	0.526499	0.633384	0.592258	0.551171	0.621369	0.561599	0.723769														BUB-1 vs. CLS-2	0.5101	0.469	0.04111	0.007468	563	1348	7.784	8436
0.485216	0.634129	0.708751	0.525912	0.632864	0.591427	0.550729	0.617142	0.561599	0.719997														BUB-1 vs. CLS-2R970A	0.5101	0.502	0.008112	0.008248	563	772	1.391	8436
0.479999	0.633912	0.70691	0.525405	0.632729	0.591427	0.550589	0.617142	0.561599	0.719997														BUB-1 vs. BUB-1+HCP-1	0.5101	0.5403	-0.03011	0.008077	563	855	5.272	8436
0.479999	0.629999	0.70691	0.521377	0.632196	0.58909	0.549818	0.612973	0.560464	0.719997														BUB-1 vs. BUB-1+CLS-2	0.5101	0.5404	-0.03022	0.009235	563	482	4.628	8436
0.477875	0.629999	0.704936	0.521377	0.631963	0.588118	0.549677	0.610436	0.560001	0.718021														BUB-1 vs. HCP-1+CLS-2	0.5101	0.5803	-0.07012	0.008761	563	592	11.32	8436
0.477875	0.623076	0.703085	0.519495	0.629999	0.585762	0.549677	0.609231	0.559422	0.717719														BUB-1 vs. BUB-1+HCP-1+CLS-2	0.5101	0.6207	-0.1105	0.00832	563	741	18.79	8436
0.474894	0.622373	0.702001	0.518398	0.628862	0.5832	0.547398	0.609231	0.557419	0.716267														BUB-1 vs. BUB-1+HCP-1+CLS-2R970A	0.5101	0.6819	-0.1718	0.01179	563	222	20.6	8436
0.473424	0.621818	0.702001	0.517605	0.626401	0.582472	0.546206	0.60845	0.557419	0.71374														HCP-1 vs. CLS-2	0.7318	0.469	0.2628	0.006268	969	1348	59.3	8436
0.470494	0.61941	0.700538	0.516521	0.625866	0.581538	0.545047	0.606314	0.554999	0.712022														HCP-1 vs. CLS-2R970A	0.7318	0.502	0.2298	0.00718	969	772	45.27	8436
0.470494	0.618692	0.700538	0.516521	0.625416	0.581538	0.544614	0.60535	0.554593	0.71122														HCP-1 vs. BUB-1+HCP-1	0.7318	0.5403	0.1916	0.006983	969	855	38.8	8436
0.469566	0.617142	0.698822	0.515146	0.618778	0.575999	0.544001	0.603529	0.552556	0.710138														HCP-1 vs. BUB-1+CLS-2	0.7318	0.5404	0.1915	0.008295	969	482	32.64	8436
0.469566	0.617142	0.698822	0.514285	0.617142	0.575999	0.543311	0.602306	0.552368	0.710138														HCP-1 vs. HCP-1+CLS-2	0.7318	0.5803	0.1516	0.007763	969	592	27.61	8436
0.466558	0.617142	0.697639	0.514285	0.617142	0.575999	0.543087	0.601238	0.551629	0.708922														HCP-1 vs. BUB-1+HCP-1+CLS-2	0.7318	0.6207	0.1112	0.007263	969	741	21.64	8436
0.46136	0.617142	0.694285	0.510546	0.617142	0.574678	0.541881	0.596248	0.551018	0.708751														HCP-1 vs. BUB-1+HCP-1+CLS-2R970A	0.7318	0.6819	0.04993	0.01107	969	222	6.377	8436
0.459	0.609231	0.6912	0.508234	0.615544	0.57306	0.537463	0.595863	0.549998	0.707795														CLS-2 vs. CLS-2R970A	0.469	0.502	-0.03299	0.006717	1348	772	6.946	8436
0.459	0.608727	0.688351	0.503999	0.614309	0.570567	0.536274	0.594362	0.547827	0.705304														CLS-2 vs. BUB-1+HCP-1	0.469	0.5403	-0.07122	0.006506	1348	855	15.48	8436
0.459	0.60845	0.687998	0.503999	0.614309	0.57024	0.534193	0.594001	0.545934	0.704549														CLS-2 vs. BUB-1+CLS-2	0.469	0.5404	-0.07133	0.007898	1348	482	12.77	8436
0.459	0.606314	0.684876	0.501678	0.614118	0.568422	0.533333	0.592939	0.544538	0.695592														CLS-2 vs. HCP-1+CLS-2	0.469	0.5803	-0.1112	0.007338	1348	592	21.44	8436
0.45818	0.604797	0.684358	0.501547	0.613332	0.566556	0.531518	0.59178	0.544538	0.687271														CLS-2 vs. BUB-1+HCP-1+CLS-2	0.469	0.6207	-0.1516	0.006806	1348	741	31.51	8436
0.45818	0.60279	0.683076	0.500867	0.608727	0.564546	0.53069	0.591427	0.539998	0.685383														CLS-2 vs. BUB-1+HCP-1+CLS-2R970A	0.469	0.6819	-0.2129	0.01078	1348	222	27.93	8436
0.454738	0.599999	0.682106	0.49846	0.607498	0.563479	0.528344	0.590163	0.539998	0.684876														CLS-2R970A vs. BUB-1+HCP-1	0.502	0.5403	-0.03822	0.007389	772	855	7.316	8436
0.454738	0.599999	0.682106	0.497845	0.607498	0.558621	0.527633	0.58909	0.539998	0.68														CLS-2R970A vs. BUB-1+CLS-2	0.502	0.5404	-0.03834	0.008639	772	482	6.275	8436
0.448832	0.597234	0.682106	0.496801	0.605607	0.55604	0.52683	0.58817	0.536222	0.679719														CLS-2R970A vs. HCP-1+CLS-2	0.502	0.5803	-0.07823	0.00813	772	592	13.61	8436
0.448616	0.592939	0.682106	0.494999	0.604797	0.554593	0.521377	0.586664	0.535678	0.678857														CLS-2R970A vs. BUB-1+HCP-1+CLS-2	0.502	0.6207	-0.1187	0.007654	772	741	21.92	8436
0.447806	0.59178	0.681555	0.494658	0.604797	0.553171	0.517182	0.586284	0.534858	0.677871														CLS-2R970A vs. BUB-1+HCP-1+CLS-2R970A	0.502	0.6819	-0.1799	0.01133	772	222	22.44	8436
0.447806	0.591285	0.679354	0.494606	0.603444	0.551998	0.514967	0.585288	0.534858	0.677648														BUB-1+HCP-1 vs. BUB-1+CLS-2	0.5403	0.5404	-0.000111	0.008477	855	482	0.01851	8436
0.447338	0.58909	0.677648	0.49091	0.599999	0.551488	0.514285	0.585001	0.533645	0.672318														BUB-1+HCP-1 vs. HCP-1+CLS-2	0.5403	0.5803	-0.04001	0.007957	855	592	7.111	8436
0.446897	0.58909	0.677648	0.49091	0.599999	0.550589	0.514285	0.583783	0.533333	0.670346														BUB-1+HCP-1 vs. BUB-1+HCP-1+CLS-2	0.5403	0.6207	-0.08043	0.00747	855	741	15.23	8436
0.446897	0.58909	0.677014	0.489895	0.598696	0.549818	0.512162	0.575999	0.530526	0.670098														BUB-1+HCP-1 vs. BUB-1+HCP-1+CLS-2R970A	0.5403	0.6819	-0.1417	0.01121	855	222	17.87	8436
0.441817	0.585001	0.674998	0.487216	0.598627	0.548758	0.511577	0.575999	0.530526	0.666847														BUB-1+CLS-2 vs. HCP-1+CLS-2	0.5404	0.5803	-0.0399	0.00913	482	592	6.18	8436
0.437839	0.584001	0.674998	0.486	0.597072	0.54857	0.510968	0.57356	0.526387	0.664614														BUB-1+CLS-2 vs. BUB-1+HCP-1+CLS-2	0.5404	0.6207	-0.08032	0.008709	482	741	13.04	8436
0.437141	0.583783	0.674998	0.485287	0.592939	0.546351	0.510546	0.57306	0.524746	0.662728														BUB-1+CLS-2 vs. BUB-1+HCP-1+CLS-2R970A	0.5404	0.6819	-0.1415	0.01207	482	222	16.58	8436
0.435791	0.580297	0.674998	0.484899	0.590767	0.545685	0.509663	0.572015	0.52457	0.661623														HCP-1+CLS-2 vs. BUB-1+HCP-1+CLS-2	0.5803	0.6207	-0.04042	0.008204	592	741	6.968	8436
0.431998	0.577675	0.674138	0.483157	0.590398	0.543724	0.508234	0.571241	0.519495	0.656266														HCP-1+CLS-2 vs. BUB-1+HCP-1+CLS-2R970A	0.5803	0.6819	-0.1016	0.01171	592	222	12.27	8436
0.431998	0.577675	0.673244	0.482144	0.58909	0.539998	0.508234	0.570857	0.516808	0.655166														BUB-1+HCP-1+CLS-2 vs. BUB-1+HCP-1+CLS-2R970A	0.6207	0.6819	-0.06122	0.01139	741	222	7.604	8436
0.431998	0.575999	0.669296	0.479999	0.58909	0.539998	0.508234	0.568422	0.516385	0.653537
0.431998	0.575999	0.669296	0.479999	0.587518	0.539998	0.506249	0.565903	0.515951	0.65338
0.431998	0.57306	0.669131	0.479999	0.587182	0.539998	0.503013	0.565714	0.514967	0.649831
0.431998	0.568422	0.668569	0.47848	0.584471	0.539998	0.501427	0.565114	0.512999	0.647998
0.431998	0.564546	0.666847	0.477875	0.584471	0.535814	0.500386	0.561599	0.510873	0.647998
0.431998	0.563479	0.664614	0.476472	0.584034	0.533933	0.497369	0.558621	0.507383	0.64174
0.431998	0.561261	0.664614	0.474148	0.5832	0.533645	0.494658	0.558621	0.505824	0.641248
0.429611	0.559285	0.661223	0.473685	0.582857	0.533645	0.485394	0.558621	0.505756	0.640551
0.429611	0.558621	0.659998	0.473424	0.582408	0.531338	0.484487	0.557419	0.49846	0.638873
0.423732	0.558621	0.659998	0.4725	0.581918	0.52898	0.483961	0.556699	0.496686	0.636521
0.419419	0.557419	0.659998	0.471548	0.580297	0.52898	0.481724	0.552958	0.496217	0.636
0.417272	0.557419	0.658284	0.471272	0.579739	0.528508	0.481091	0.552757	0.495285	0.635886
0.417272	0.553171	0.65739	0.470975	0.579513	0.525405	0.479999	0.550589	0.494999	0.635292
0.417272	0.551488	0.65508	0.470119	0.578822	0.523636	0.479999	0.547903	0.494237	0.635292
0.413331	0.551488	0.654545	0.468678	0.575999	0.522578	0.479999	0.547201	0.493714	0.632729
0.411428	0.551488	0.650957	0.467028	0.575999	0.518398	0.479999	0.546836	0.489055	0.628862
0.411428	0.549152	0.650098	0.466811	0.574469	0.516521	0.473808	0.546507	0.488032	0.626401
0.392725	0.547903	0.649913	0.466732	0.57306	0.514285	0.4725	0.543231	0.484412	0.623076
0.387692	0.545047	0.647998	0.465	0.569922	0.513441	0.472184	0.542714	0.482825	0.621177
0.384	0.543885	0.647998	0.462858	0.569902	0.513266	0.468433	0.539998	0.482825	0.619998
0.384	0.543311	0.647998	0.462858	0.567999	0.509814	0.465517	0.539998	0.482437	0.617142
0.372413	0.543231	0.647998	0.462141	0.564421	0.509814	0.462858	0.539998	0.481982	0.612146
0.36643	0.543087	0.645196	0.457499	0.564075	0.508234	0.462113	0.539998	0.479999	0.608987
0.36643	0.542826	0.644371	0.456813	0.563479	0.508234	0.461538	0.539998	0.476472	0.607498
0.359999	0.542558	0.642163	0.455671	0.563479	0.504432	0.455144	0.539998	0.474973	0.607258
0.359999	0.539998	0.640001	0.45551	0.559285	0.503999	0.454285	0.539998	0.471722	0.604797
0.356288	0.539998	0.640001	0.454738	0.559285	0.503299	0.453333	0.538504	0.469286	0.604797
0.352653	0.539998	0.640001	0.454738	0.552958	0.501427	0.452357	0.538504	0.467308	0.603871
0.351627	0.539998	0.639185	0.453333	0.551018	0.499592	0.452093	0.538504	0.467233	0.60279
0.342439	0.539998	0.638873	0.451688	0.550589	0.49846	0.451916	0.537259	0.466026	0.599999
0.342439	0.539998	0.635292	0.45	0.547607	0.49846	0.451585	0.53695	0.465229	0.599621
0.342439	0.539998	0.632196	0.449666	0.545453	0.49846	0.45	0.536726	0.459803	0.599122
0.338822	0.539998	0.632196	0.448832	0.544863	0.496396	0.45	0.535538	0.457412	0.597072
0.332309	0.532601	0.632196	0.447806	0.542951	0.492944	0.447806	0.532733	0.453333	0.596946
0.332309	0.531942	0.631697	0.446897	0.539998	0.492631	0.445191	0.530299	0.451526	0.588118
0.332309	0.531694	0.629999	0.446897	0.539998	0.492631	0.443368	0.529811	0.443836	0.583783
0.332309	0.530846	0.629402	0.446583	0.539998	0.49091	0.44292	0.527557	0.442205	0.5832
0.324001	0.530183	0.627096	0.445498	0.539998	0.489598	0.442131	0.527441	0.441192	0.578269
0.324001	0.529411	0.627096	0.445191	0.539998	0.488571	0.441817	0.527242	0.43875	0.575567
0.313547	0.528508	0.626086	0.445089	0.539998	0.486761	0.43884	0.525405	0.433735	0.569998
0.313547	0.527441	0.625261	0.444704	0.539998	0.483581	0.438259	0.525405	0.431998	0.569765
0.313547	0.527441	0.623999	0.444704	0.537315	0.479999	0.437466	0.523636	0.431998	0.569672
0.295253	0.526255	0.623504	0.441817	0.535858	0.479999	0.436058	0.523229	0.428988	0.568422
0.295253	0.520851	0.623504	0.440815	0.53561	0.47848	0.434998	0.523125	0.422608	0.566431
0.295253	0.52048	0.622373	0.439025	0.534021	0.47593	0.4349	0.523017	0.419341	0.564075
0.295253	0.516923	0.620998	0.438856	0.533645	0.474148	0.431998	0.523017	0.418066	0.562416
0.295253	0.516226	0.620687	0.436854	0.533645	0.4725	0.431998	0.521377	0.416841	0.561848
0.290419	0.515453	0.620426	0.436595	0.532601	0.471272	0.430818	0.520851	0.409655	0.561848
0.290419	0.514847	0.620426	0.433606	0.529271	0.467028	0.428016	0.519495	0.409264	0.561599
0.284212	0.514285	0.617142	0.431998	0.528508	0.467028	0.427499	0.518398	0.409264	0.558806
0.284212	0.512999	0.617142	0.431998	0.526499	0.466365	0.427378	0.515078	0.402785	0.556699
0.284212	0.512804	0.617142	0.431998	0.525081	0.464515	0.422068	0.512999	0.399131	0.556362
0.275744	0.512541	0.617142	0.431998	0.523636	0.462858	0.421199	0.51264	0.396329	0.556362
0.251429	0.511577	0.617142	0.431998	0.521377	0.462858	0.417272	0.511577	0.393882	0.550589
0.251429	0.511577	0.61132	0.431998	0.520001	0.461885	0.414719	0.511577	0.387392	0.549818
0.251429	0.511243	0.608153	0.431998	0.518398	0.461124	0.411428	0.511143	0.38717	0.54857
0.251429	0.510001	0.607705	0.431998	0.516521	0.460801	0.411073	0.511143	0.382584	0.548257
	0.50747	0.605273	0.431998	0.514285	0.460328	0.408889	0.509814	0.376118	0.539998
1.08	0.506814	0.604797	0.431998	0.513931	0.459575	0.408647	0.509269	0.370286	0.539998
1.08	0.505533	0.604797	0.431998	0.512541	0.457412	0.408108	0.508234	0.363673	0.539998
0.965106	0.504933	0.603529	0.431998	0.511999	0.454738	0.407546	0.508234	0.357791	0.539998
0.83613	0.50467	0.602306	0.430277	0.511577	0.452904	0.402711	0.508234	0.338822	0.539998
0.763449	0.503999	0.601965	0.429137	0.511577	0.452904	0.398768	0.505159	0.332309	0.539998
0.762351	0.503625	0.599999	0.428765	0.511143	0.448085	0.396329	0.501427	0.32276	0.537143
0.748515	0.503013	0.599999	0.428106	0.510546	0.447998	0.39438	0.499247	0.311999	0.53617
0.744827	0.501427	0.599999	0.427722	0.510001	0.44241	0.393964	0.49846	0.308571	0.535134
0.739326	0.50103	0.599999	0.427499	0.509269	0.439998	0.389509	0.494999	0.308571	0.534509
0.738947	0.500867	0.598907	0.427499	0.506814	0.437141	0.383552	0.494658	0.261817	0.532497
0.733981	0.500486	0.598152	0.424617	0.502576	0.4349	0.383226	0.494456	0.256551	0.530526
0.719997	0.49846	0.598152	0.421461	0.501427	0.431998	0.379579	0.494118	0.210001	0.513564
0.711374	0.493714	0.597855	0.42053	0.500867	0.431998	0.377998	0.493714	0.632196	0.512684
0.707586	0.492885	0.597445	0.419998	0.500097	0.431998	0.375255	0.489717	0.644371	0.512541
0.701655	0.486761	0.597445	0.419787	0.499123	0.429544	0.368998	0.489598	0.644371	0.508572
0.698443	0.486	0.595863	0.418774	0.497591	0.427922	0.363103	0.487743	0.644371	0.507383
0.697498	0.483581	0.595863	0.418066	0.496551	0.427722	0.359999	0.486551	0.644371	0.503013
0.696774	0.483581	0.594496	0.416146	0.49488	0.426187	0.35819	0.486	0.644371	0.501427
0.688965	0.483157	0.593588	0.415168	0.494749	0.424284	0.350489	0.484899	0.423094	0.494837
0.688351	0.48233	0.593588	0.413398	0.49323	0.424284	0.350489	0.481242	0.666665	0.494658
0.686354	0.482144	0.593588	0.411428	0.489895	0.423094	0.34941	0.479999	0.666665	0.49091
0.684876	0.479999	0.592939	0.410752	0.489055	0.421461	0.34866	0.478761	0.724738	0.487973
0.684358	0.479999	0.592939	0.407546	0.488888	0.421461	0.347143	0.477693	0.653537	0.48427
0.682106	0.479999	0.592258	0.406816	0.487058	0.418774	0.346861	0.477472	0.729728	0.482825
0.678857	0.47593	0.591999	0.406586	0.486935	0.416384	0.3462	0.476219	0.729728	0.479999
0.67814	0.473685	0.590503	0.405001	0.485679	0.415383	0.340715	0.475053	0.53533	0.476472
0.677648	0.470324	0.587077	0.405001	0.484899	0.414418	0.339776	0.474724	0.613727	0.475088
0.676029	0.469566	0.586956	0.405001	0.484539	0.41389	0.335999	0.474148	1.00097	0.470494
0.674998	0.467868	0.584471	0.403199	0.483157	0.413616	0.334972	0.4725	0.945	0.467028
0.674998	0.467462	0.583783	0.402485	0.48233	0.412737	0.334833	0.4725	0.863999	0.465367
0.67135	0.467028	0.583783	0.400823	0.480874	0.41196	0.32886	0.471062	0.849836	0.464298
0.664614	0.467028	0.583783	0.4	0.478101	0.411428	0.312708	0.467999	0.814425	0.464132
0.663157	0.466665	0.581538	0.399131	0.477875	0.408647	0.311237	0.464515	0.768814	0.463446
0.661223	0.465414	0.581538	0.398386	0.476756	0.407214	0.279182	0.462405	0.763903	0.455352
0.659998	0.464811	0.578026	0.392725	0.476472	0.406449		0.46209	0.759452	0.452093
0.659368	0.464811	0.575999	0.391935	0.474148	0.406336	1.08	0.460328	0.742499	0.446327
0.654545	0.46373	0.574178	0.390638	0.471931	0.405001	0.860489	0.459575	0.741816	0.444704
0.653446	0.461739	0.569998	0.39	0.468137	0.402208	0.847851	0.456924	0.741176	0.431998
0.650957	0.460328	0.568422	0.39	0.467892	0.4	0.811559	0.452904		0.412362
0.647998	0.459575	0.568422	0.39	0.467028	0.397545	0.809997	0.447668	1.44	0.401607
0.647998	0.458759	0.566556	0.386341	0.465229	0.386524	0.807272	0.446897	1.39764	0.38919
0.642856	0.45818	0.565714	0.385715	0.464515	0.385715	0.789229	0.446445	1.39764	0.379183
0.642532	0.456924	0.563479	0.385116	0.462858	0.384	0.785453	0.445026	1.15714	0.34468
0.642462	0.456337	0.561599	0.384229	0.459922	0.381768	0.7848	0.444704	1.152
0.64174	0.454738	0.56141	0.382977	0.45779	0.381177	0.783529	0.437219	1.125
0.641248	0.454738	0.558621	0.382627	0.457479	0.381177	0.781789	0.435791	1.11086
0.640001	0.452093	0.557419	0.3823	0.453333	0.381177	0.76557	0.435222	1.08
0.637123	0.44928	0.556362	0.380516	0.452093	0.378946	0.762351	0.434806	1.0368
0.636922	0.448301	0.553846	0.377998	0.452093	0.375652	0.758296	0.431998	0.99692
0.635292	0.447806	0.553846	0.37529	0.449481	0.374692	0.753489	0.431998	0.992433
0.63056	0.446897	0.553388	0.374692	0.446897	0.373846	0.750636	0.431998	0.987429
0.627905	0.443572	0.552556	0.374568	0.444374	0.364336	0.75042	0.428106	0.96369
0.626565	0.443077	0.552179	0.372821	0.444111	0.363185	0.742267	0.426438	0.954416
0.626086	0.440815	0.551737	0.372413	0.443521	0.363026	0.742204	0.425455	0.939131
0.625261	0.440815	0.550589	0.372413	0.442284	0.351627	0.737562	0.424918	0.925714
0.623504	0.439998	0.550589	0.372413	0.442146	0.351627	0.737562	0.424679	0.907824
0.621818	0.431998	0.549818	0.37192	0.440387	0.349089	0.733136	0.422346	0.89561
0.620128	0.431998	0.545453	0.370907	0.439645	0.342554	0.726051	0.421461	0.892175
0.6193	0.419419	0.545244	0.369731	0.43893	0.342554	0.722939	0.416841	0.885246
0.619108	0.418774	0.543396	0.368532	0.436152	0.337501	0.719997	0.413218	0.870447
0.617142	0.418066	0.542951	0.36795	0.435791	0.326037	0.719997	0.412022	0.863999
0.617142	0.418066	0.539998	0.367659	0.434285	0.325161	0.719997	0.411428	0.845216
0.614481	0.415383	0.539998	0.367659	0.434116	0.317647	0.717012	0.404334	0.843751
0.614118	0.412362	0.539998	0.365751	0.431998	0.317647	0.713205	0.403515	0.839999
0.613894	0.411428	0.53647	0.363789	0.431998	0.312288	0.709799	0.399061	0.828838
0.613772	0.411428	0.536374	0.363363	0.431998	0.308571	0.708388	0.397895	0.82421
0.613637	0.406449	0.533333	0.362324	0.429737	0.30614	0.701297	0.396734	0.821947
0.611682	0.40403	0.529811	0.361057	0.423528	0.294546	0.69913	0.392725	0.82174
0.610908	0.402711	0.529811	0.359999	0.423528	0.254116	0.698476	0.387692	0.82174
0.606741	0.402352	0.529811	0.359999	0.421602	0.220909	0.695084	0.3823	0.82174
0.605452	0.401861	0.52898	0.359999	0.419239	0.216	0.691874	0.381818	0.809997
0.604797	0.4	0.52683	0.359999	0.417678	0.202499	0.68936	0.379898	0.804704
0.60435	0.399326	0.526151	0.359999	0.416001		0.684358	0.379781	0.799998
0.603724	0.39857	0.526151	0.358294	0.416001	1.26	0.682417	0.379579	0.799998
0.603529	0.397439	0.525405	0.355765	0.416001	1.0368	0.675491	0.374401	0.797838
0.60279	0.385715	0.524271	0.355149	0.415899	1.0125	0.674998	0.372677	0.797838
0.601965	0.3823	0.518398	0.354096	0.415383	0.932728	0.673041	0.370286	0.797144
0.601965	0.381177	0.517182	0.352173	0.409089	0.925714	0.672897	0.3661	0.796595
0.600795	0.380159	0.515819	0.351627	0.403515	0.896605	0.67288	0.365712	0.794481
0.599999	0.377757	0.514285	0.351627	0.4	0.883634	0.669131	0.365069	0.793124
0.59831	0.376914	0.510809	0.348698	0.399131	0.863999	0.668833	0.362878	0.790242
0.595863	0.371614	0.510546	0.34866	0.399131	0.863999	0.667636	0.353454	0.785453
0.595863	0.369165	0.508234	0.347998	0.395884	0.863999	0.665864	0.348385	0.779999
0.595863	0.365069	0.508234	0.346668	0.395643	0.848569	0.665753	0.339174	0.776629
0.595514	0.363026	0.508234	0.34659	0.392725	0.839999	0.665753	0.337501	0.772681
0.595384	0.351	0.508234	0.345976	0.392725	0.799998	0.663751	0.333914	0.766453
0.59478	0.348923	0.508234	0.345601	0.387481	0.790242	0.662522	0.332309	0.762351
0.594001	0.345601	0.505159	0.345307	0.384949	0.788105	0.661223	0.332309	0.758918
0.594001	0.27953	0.503999	0.340159	0.381177	0.788105	0.661223	0.32832	0.755997
0.58909	0.273599	0.503999	0.338822	0.380159	0.785453	0.657777	0.315787	0.755189
0.587927	0.254116	0.500212	0.337876	0.379898	0.779999	0.65739	0.289284	0.751303
0.587927	0.220406	0.500212	0.337501	0.377998	0.778605	0.65739	0.281739	0.747067
0.587753		0.495531	0.335798	0.377143	0.7776	0.657106	0.27743	0.744827
0.587368	0.755244	0.494237	0.333424	0.372413	0.771427	0.656958	0.252262	0.737562
0.586664	0.735319	0.494043	0.332309	0.371614	0.76557	0.656756	0.162002	0.733586
0.584034	0.719997	0.492151	0.329006	0.369044	0.762982	0.655714		0.732855
0.583783	0.713569	0.49091	0.327857	0.368183	0.759999	0.65508	1.44	0.732203
0.581538	0.684876	0.489229	0.325932	0.365538	0.757115	0.654232	1.23429	0.731077
0.580645	0.684358	0.489055	0.325227	0.361506	0.755997	0.65417	1.08	0.73059
0.580297	0.673761	0.489055	0.32108	0.357942	0.755997	0.650604	1.08	0.725434
0.577675	0.662398	0.487743	0.314055	0.333818	0.750315	0.647998	1.08	0.719997
0.577243	0.654545	0.487743	0.312288	0.330966	0.747692	0.647089	1.008	0.719997
0.575999	0.647998	0.487743	0.311353	0.330812	0.742086	0.646227	0.992433	0.719997
0.575066	0.643402	0.485679	0.310499	0.302399	0.740569	0.642581	0.990001	0.719997
0.574178	0.642163	0.484899	0.310345	0.302399	0.729728	0.641248	0.96	0.719997
0.57375	0.638181	0.484139	0.308571	0.27871	0.725757	0.640001	0.939131	0.719997
0.57306	0.635292	0.479999	0.308571	0.243	0.719997	0.635292	0.925714	0.719997
0.57306	0.635292	0.479999	0.308571	0.203773	0.714928	0.635292	0.925714	0.719997
0.570337	0.635292	0.479999	0.308571		0.707899	0.631914	0.925714	0.719997
0.568422	0.628363	0.478168	0.308571		0.707899	0.629999	0.925714	0.719997
0.567273	0.624705	0.47593	0.308571	0.863999	0.706155	0.629484	0.909475	0.712578
0.565114	0.623076	0.475713	0.308571	0.683263	0.706155	0.628658	0.907199	0.70691
0.56269	0.621659	0.475713	0.308571	0.680547	0.700538	0.627325	0.900001	0.705742
0.561848	0.621369	0.471931	0.306579	0.670346	0.699622	0.626401	0.900001	0.70484
0.561599	0.620998	0.471931	0.30494	0.668569	0.698822	0.623999	0.897228	0.702001
0.561039	0.619671	0.469566	0.300001	0.653022	0.696774	0.623284	0.893791	0.696774
0.561039	0.618386	0.469266	0.29793	0.647998	0.696774	0.623076	0.883634	0.696774
0.561039	0.617142	0.469266	0.295891	0.642856	0.694285	0.622373	0.846485	0.694285
0.557419	0.617142	0.463998	0.294546	0.598152	0.69283	0.617142	0.839999	0.69049
0.557419	0.614118	0.462858	0.294546	0.596841	0.6912	0.617142	0.839999	0.688351
0.55604	0.609569	0.462858	0.29288	0.584471	0.687271	0.617142	0.827234	0.687271
0.555429	0.608987	0.462858	0.287998	0.581538	0.685241	0.615699	0.819311	0.678857
0.554211	0.607905	0.459575	0.287292	0.568422	0.684163	0.614635	0.817298	0.678857
0.553846	0.607498	0.459575	0.284212	0.567592	0.682106	0.612537	0.817298	0.677014
0.552556	0.604797	0.452904	0.282617	0.56681	0.682106	0.612537	0.811812	0.674998
0.551825	0.599999	0.452904	0.27871	0.554593	0.68	0.61244	0.809997	0.671999
0.551488	0.597669	0.452093	0.27871	0.554593	0.678857	0.611682	0.799998	0.671999
0.551488	0.595863	0.452093	0.27717	0.546836	0.677648	0.61068	0.79803	0.66804
0.54857	0.595457	0.45	0.272124	0.545934	0.677014	0.609675	0.794117	0.666
0.546507	0.592258	0.449107	0.264491	0.539998	0.674998	0.609231	0.789443	0.664614
0.544863	0.590941	0.448832	0.259201	0.537143	0.67439	0.608645	0.787623	0.661223
0.544863	0.590625	0.447566	0.253409	0.534653	0.674043	0.608067	0.787119	0.658123
0.543087	0.58909	0.447566	0.251777	0.531942	0.673244	0.607282	0.785453	0.658012
0.542378	0.586664	0.445714	0.25065	0.525912	0.672785	0.607229	0.778938	0.65739
0.539998	0.585762	0.443077	0.248633	0.524271	0.67135	0.606741	0.774855	0.654545
0.539998	0.580964	0.442622	0.235635	0.523636	0.670346	0.605676	0.769655	0.653331
0.539998	0.579513	0.439998	0.231672	0.519116	0.667636	0.604797	0.769315	0.653331
0.539998	0.575999	0.436854	0.231428	0.518398	0.667057	0.603168	0.746181	0.653022
0.539998	0.575999	0.436854	0.227368	0.517501	0.666384	0.601238	0.746181	0.652076
0.539998	0.575999	0.434716	0.227368	0.517067	0.664614	0.599999	0.741985	0.650768
0.539998	0.574469	0.431998	0.226956	0.510546	0.664614	0.599999	0.736362	0.644777
0.539998	0.574178	0.431998	0.21966	0.508234	0.661223	0.599999	0.733586	0.644338
0.537079	0.57375	0.431998	0.218734	0.508234	0.661223	0.598809	0.732203	0.644034
0.534433	0.569551	0.431998	0.213331	0.506249	0.658012	0.597445	0.73014	0.642163
0.532985	0.566556	0.429474	0.199149	0.504933	0.65739	0.595863	0.723211	0.641248
0.530526	0.565714	0.426496	0.192	0.504364	0.65739	0.591427	0.719997	0.639099
0.530183	0.564179	0.424284	0.186924	0.503999	0.655714	0.589713	0.719997	0.639099
0.529199	0.563479	0.419998	0.172799	0.503999	0.654545	0.58909	0.719997	0.639054
0.52683	0.563479	0.418066	0.15158	0.5025	0.653685	0.586664	0.719997	0.638607
0.523915	0.561848	0.418066	0.127359	0.500867	0.651426	0.585762	0.719997	0.635292
0.521377	0.56077	0.41502	0.0939147	0.49846	0.649999	0.58475	0.716681	0.634735
0.520943	0.560001	0.409264		0.49846	0.648967	0.584661	0.713393	0.633772
0.520292	0.558879	0.409264	0.939131	0.496991	0.647998	0.579513	0.710138	0.631493
0.519068	0.557419	0.408647	0.734844	0.494658	0.647998	0.57936	0.70848	0.630486
0.517366	0.554754	0.401143	0.719997	0.492631	0.647998	0.577424	0.705304	0.629999
0.517182	0.551998	0.397895	0.65898	0.492151	0.646297	0.575999	0.704348	0.629124
0.515819	0.551488	0.392725	0.65739	0.491374	0.645069	0.57375	0.703256	0.628731
0.514285	0.549818	0.392725	0.647998	0.488441	0.644514	0.57375	0.700926	0.628658
0.514285	0.549152	0.391646	0.647089	0.486761	0.644211	0.57375	0.700851	0.628658
0.507271	0.546206	0.39	0.638181	0.484899	0.644211	0.573201	0.696774	0.626401
0.506249	0.545805	0.382783	0.632196	0.479999	0.642163	0.571567	0.694672	0.625792
0.506058	0.544614	0.382627	0.623076	0.479999	0.636279	0.569099	0.694285	0.625261
0.504281	0.544538	0.381177	0.614635	0.477472	0.635292	0.568422	0.694285	0.624669
0.502576	0.543015	0.377998	0.601518	0.476883	0.634501	0.566999	0.693333	0.622373
0.5025	0.539998	0.375652	0.59478	0.476219	0.632196	0.566431	0.692306	0.621369
0.496217	0.539998	0.375652	0.591537	0.474894	0.631169	0.566214	0.6912	0.621369
0.494999	0.539998	0.373846	0.583783	0.474547	0.629292	0.565714	0.688351	0.619998
0.494999	0.539998	0.372413	0.578572	0.474452	0.628363	0.564924	0.687998	0.617142
0.494749	0.539998	0.370286	0.571426	0.474148	0.627905	0.560609	0.687998	0.617142
0.49091	0.539998	0.367659	0.570567	0.472994	0.627096	0.559555	0.687271	0.613772
0.49091	0.539998	0.364045	0.566556	0.4725	0.626086	0.558119	0.684001	0.613332
0.49091	0.539998	0.359999	0.561357	0.4709	0.625261	0.556221	0.681082	0.61132
0.490085	0.539998	0.359999	0.558621	0.47077	0.623999	0.5544	0.680547	0.61132
0.489895	0.537015	0.356288	0.549152	0.47077	0.623504	0.547201	0.677871	0.609231
0.487743	0.536058	0.352653	0.547201	0.469566	0.621818	0.546953	0.676364	0.605855
0.487058	0.533793	0.352653	0.539998	0.467533	0.621369	0.546668	0.676029	0.60435
0.483355	0.532985	0.351627	0.539998	0.465229	0.620426	0.545047	0.674998	0.600901
0.479999	0.532985	0.350269	0.539998	0.464811	0.619826	0.539998	0.674998	0.599223
0.479999	0.532601	0.329492	0.53838	0.463446	0.617142	0.539998	0.674138	0.598152
0.478287	0.532601	0.302803	0.537759	0.462858	0.617142	0.539998	0.671999	0.596642
0.475199	0.531694	0.302803	0.52898	0.462858	0.615483	0.539998	0.663157	0.596642
0.475199	0.530846	0.295891	0.528001	0.462062	0.614008	0.539998	0.661499	0.595863
0.471722	0.530846	0.294546	0.525405	0.460801	0.612537	0.537203	0.65898	0.592939
0.466365	0.530183	0.287998	0.517182	0.459922	0.612	0.533645	0.658655	0.591427
0.466026	0.529271	0.285282	0.514285	0.457412	0.61132	0.533129	0.65739	0.58909
0.463391	0.528748	0.274909	0.512999	0.456924	0.610436	0.528716	0.65739	0.58909
0.454738	0.528001	0.274909	0.504225	0.456924	0.609231	0.527441	0.65739	0.58649
0.4536	0.52683	0.261817	0.502818	0.456924	0.608275	0.526052	0.655714	0.585422
0.448616	0.524271	0.225672	0.501121	0.45653	0.606314	0.525405	0.653685	0.582185
0.448301	0.522195	0.196362	0.49846	0.45551	0.604797	0.523636	0.653195	0.580754
0.447806	0.521377		0.498043	0.453034	0.604797	0.523636	0.6525	0.579946
0.445561	0.521377	1.25419	0.490307	0.451637	0.603529	0.523436	0.651722	0.578572
0.445498	0.520791	1.23429	0.489836	0.449107	0.603241	0.522702	0.651426	0.57818
0.443077	0.520715	1.23429	0.489055	0.449107	0.60279	0.522	0.649913	0.575999
0.443077	0.520715	1.22087	0.487743	0.448663	0.602123	0.519698	0.649913	0.575999
0.441817	0.518398	1.188	0.485394	0.448183	0.601965	0.516923	0.649625	0.575999
0.439323	0.517684	1.1232	0.481443	0.448085	0.599999	0.516106	0.646342	0.572306
0.435791	0.516808	1.12	0.481242	0.44628	0.599999	0.515951	0.645311	0.571765
0.435485	0.516521	1.10842	0.479999	0.444704	0.597965	0.515369	0.644211	0.571035
0.431998	0.515819	1.10298	0.477875	0.44248	0.595863	0.512254	0.644211	0.569998
0.424918	0.515819	1.08	0.477693	0.441817	0.595514	0.511999	0.642856	0.568422
0.423528	0.515819	1.08	0.476472	0.440815	0.5951	0.510546	0.642856	0.568422
0.416384	0.515453	1.08	0.476219	0.440254	0.594001	0.510001	0.642643	0.568422
0.406586	0.515229	1.0656	0.476219	0.439998	0.593405	0.503999	0.642163	0.568422
0.406016	0.514688	1.05796	0.47593	0.439323	0.592939	0.502166	0.640001	0.567273
0.4	0.514285	1.05081	0.475199	0.43875	0.592939	0.500486	0.639185	0.566999
0.377143	0.512999	1.04805	0.474148	0.438377	0.590941	0.499123	0.635292	0.566878
0.369475	0.512875	1.04727	0.472227	0.438259	0.58909	0.497456	0.633912	0.566068
0.368373	0.510809	1.04727	0.471722	0.436995	0.58909	0.496991	0.633601	0.565444
0.3661	0.508799	1.044	0.470865	0.43352	0.58909	0.49592	0.629999	0.565444
0.359999	0.508234	1.03846	0.470324	0.431998	0.58909	0.493714	0.629999	0.563894
0.348698	0.508234	1.03592	0.469566	0.431998	0.58909	0.492813	0.629999	0.563479
0.338594	0.506484	1.03304	0.468678	0.431998	0.58909	0.490517	0.627096	0.561949
0.332309	0.506249	1.02857	0.467999	0.431998	0.587846	0.488571	0.627096	0.561442
0.308571	0.506249	1.02109	0.466365	0.428106	0.587518	0.487743	0.625261	0.560001
0.302399	0.503999	1.02109	0.465726	0.427922	0.586284	0.487743	0.624942	0.557419
0.274909	0.503999	1.01647	0.465686	0.42612	0.586284	0.484139	0.624754	0.555791
0.274285	0.502759	1.01494	0.463805	0.425917	0.583358	0.48368	0.624489	0.551488
	0.502325	1.01333	0.462858	0.424284	0.582472	0.482552	0.622822	0.550589
0.948649	0.501427	1.0125	0.460801	0.423528	0.578968	0.48229	0.621238	0.547049
0.935999	0.501427	1.01165	0.458393	0.422855	0.575999	0.481724	0.621067	0.546953
0.867271	0.499699	1.008	0.457329	0.422068	0.575999	0.479999	0.621067	0.546836
0.856551	0.499501	1.00465	0.456687	0.421278	0.574678	0.478789	0.620687	0.54425
0.848569	0.49846	1.00224	0.456494	0.420921	0.574469	0.478599	0.620426	0.539998
0.833682	0.49846	0.99692	0.456148	0.419505	0.571765	0.478563	0.620426	0.539998
0.819311	0.497777	0.99692	0.455423	0.418605	0.568422	0.478227	0.617142	0.539998
0.809997	0.495285	0.995928	0.454738	0.418285	0.566999	0.476883	0.617142	0.539998
0.792363	0.495162	0.991475	0.454738	0.418066	0.565714	0.473808	0.616335	0.539998
0.790242	0.494456	0.984705	0.454738	0.418066	0.563479	0.472318	0.616335	0.539998
0.788571	0.493714	0.981819	0.453911	0.41604	0.563479	0.471722	0.614945	0.539998
0.782066	0.493043	0.981819	0.452904	0.415731	0.563479	0.471505	0.614888	0.537683
0.779014	0.49091	0.981819	0.451916	0.414246	0.563479	0.469566	0.614888	0.537683
0.764721	0.49091	0.979532	0.450594	0.414246	0.5625	0.468251	0.612973	0.537415
0.762351	0.49091	0.975481	0.45	0.413398	0.561949	0.467028	0.612765	0.53617
0.758918	0.490343	0.973335	0.44928	0.413218	0.558621	0.464515	0.612	0.534858
0.758635	0.490212	0.971009	0.447098	0.41294	0.557419	0.464456	0.605855	0.533933
0.753489	0.490085	0.967164	0.445714	0.411428	0.555429	0.464298	0.604797	0.533933
0.753489	0.489376	0.965106	0.44391	0.410795	0.554999	0.463391	0.604196	0.529411
0.753489	0.489055	0.963243	0.44241	0.409999	0.554862	0.463343	0.603529	0.52683
0.753159	0.489055	0.96	0.441817	0.409413	0.554593	0.463343	0.60331	0.526012
0.751303	0.487216	0.96	0.441817	0.409163	0.554593	0.462858	0.599999	0.522195
0.750315	0.486234	0.96	0.439794	0.408995	0.553846	0.459212	0.599999	0.521377
0.745713	0.484899	0.957125	0.43875	0.408647	0.553171	0.459094	0.598651	0.520651
0.745713	0.484765	0.954416	0.437682	0.407546	0.552556	0.45818	0.598249	0.52048
0.737141	0.484139	0.950399	0.436995	0.406153	0.551488	0.45818	0.595226	0.520364
0.731337	0.484139	0.949999	0.436364	0.406016	0.551018	0.45818	0.593405	0.519495
0.729115	0.483933	0.94909	0.433606	0.405907	0.550589	0.456585	0.593239	0.519232
0.726546	0.482437	0.94829	0.431998	0.405001	0.550589	0.455695	0.593239	0.514285
0.719997	0.481847	0.946995	0.431998	0.403374	0.547827	0.454738	0.589693	0.51366
0.719997	0.479999	0.935431	0.431998	0.403121	0.543087	0.454738	0.58909	0.51366
0.719997	0.479999	0.932209	0.430046	0.402352	0.539998	0.452357	0.58909	0.512728
0.719997	0.479999	0.929299	0.429317	0.401861	0.539998	0.447806	0.586284	0.508234
0.719997	0.479999	0.925714	0.429039	0.400344	0.539998	0.447157	0.585001	0.507649
0.719997	0.479999	0.925714	0.428937	0.400281	0.538051	0.443954	0.583548	0.504933
0.71374	0.479604	0.921598	0.424769	0.399451	0.537079	0.441459	0.581538	0.501217
0.71071	0.479125	0.919148	0.423528	0.396001	0.533333	0.436595	0.581538	0.501217
0.707586	0.478868	0.917999	0.423094	0.395725	0.528508	0.4349	0.579513	0.500867
0.704348	0.478702	0.916362	0.422608	0.394158	0.527441	0.430673	0.575999	0.500867
0.70296	0.476689	0.915255	0.422256	0.393749	0.520001	0.428428	0.575999	0.49846
0.702855	0.475404	0.913845	0.418066	0.393488	0.520001	0.418996	0.57306	0.49846
0.690178	0.475199	0.913845	0.418066	0.391814	0.520001	0.4185	0.572818	0.496217
0.688965	0.471272	0.913845	0.418066	0.39	0.518398	0.413616	0.571241	0.491707
0.682757	0.471272	0.910589	0.4176	0.389509	0.517808	0.413616	0.567527	0.49091
0.682106	0.47077	0.909475	0.416251	0.389237	0.517501	0.413499	0.563479	0.488464
0.682106	0.470494	0.908689	0.415946	0.386867	0.517182	0.411428	0.563479	0.487743
0.682106	0.470324	0.906427	0.415774	0.386867	0.508234	0.409264	0.561832	0.484305
0.682106	0.469566	0.905807	0.415774	0.386524	0.508234	0.393921	0.56077	0.483751
0.68	0.469566	0.904185	0.414246	0.385956	0.508234	0.392725	0.560001	0.483751
0.67814	0.467999	0.903272	0.413616	0.385116	0.506249	0.390638	0.559422	0.481526
0.677954	0.467999	0.901417	0.413042	0.384949	0.505533	0.39	0.559148	0.476883
0.674998	0.462858	0.900001	0.41294	0.384949	0.500867	0.388688	0.559148	0.474148
0.672785	0.460328	0.900001	0.412682	0.3823	0.500386	0.386341	0.558621	0.472863
0.667636	0.46	0.898687	0.412362	0.381177	0.49846	0.386341	0.557419	0.4725
0.664614	0.459575	0.895133	0.411866	0.380516	0.497456	0.385715	0.557419	0.4725
0.661936	0.459575	0.894674	0.411428	0.379999	0.496801	0.380159	0.554862	0.471722
0.661223	0.45913	0.889409	0.41087	0.379237	0.496217	0.372413	0.553846	0.469566
0.65898	0.459	0.887144	0.410577	0.378394	0.496075	0.364673	0.552556	0.467999
0.652076	0.45818	0.886153	0.410127	0.377291	0.493043	0.364336	0.550384	0.466187
0.650957	0.45818	0.884818	0.409928	0.375652	0.490379	0.359999	0.550063	0.462858
0.650957	0.454738	0.883634	0.409655	0.373846	0.489895	0.359999	0.548758	0.462858
0.650604	0.451711	0.879518	0.409542	0.372413	0.489598	0.355955	0.54672	0.46136
0.650604	0.451341	0.877497	0.409089	0.370651	0.487743	0.351627	0.546584	0.46136
0.65032	0.45	0.87683	0.405001	0.369475	0.486761	0.350768	0.539998	0.456494
0.645771	0.45	0.876342	0.405001	0.367058	0.485216	0.345601	0.533645	0.454738
0.645652	0.448832	0.874284	0.404463	0.366228	0.484139	0.342296	0.532174	0.454285
0.645652	0.448525	0.870697	0.403901	0.364045	0.484139	0.34075	0.529679	0.453911
0.644777	0.446897	0.86961	0.403737	0.363673	0.479999	0.338822	0.528001	0.453541
0.640464	0.446088	0.863999	0.403199	0.363301	0.479999	0.334285	0.525405	0.451916
0.637377	0.443836	0.863999	0.402984	0.359999	0.476472	0.327271	0.524806	0.451341
0.633101	0.43875	0.863999	0.402352	0.359999	0.474148	0.31091	0.521377	0.448734
0.632864	0.435964	0.863999	0.401143	0.359999	0.474148	0.308571	0.52048	0.447872
0.629999	0.431998	0.861573	0.397895	0.359999	0.474148	0.296471	0.519232	0.447566
0.628363	0.431998	0.861267	0.392725	0.357411	0.473685	0.269999	0.519068	0.447428
0.62502	0.431998	0.858083	0.392725	0.354096	0.471272	0.260103	0.518398	0.445934
0.624374	0.431998	0.854999	0.391409	0.353206	0.469566	0.256272	0.517182	0.441125
0.623999	0.428573	0.854676	0.390132	0.352653	0.467999	0.244527	0.517182	0.440254
0.623999	0.428193	0.853333	0.388801	0.34941	0.466365	0.234781	0.515453	0.439535
0.622373	0.427252	0.853333	0.385715	0.348056	0.466365	0.231428	0.512728	0.438259
0.622373	0.426978	0.852632	0.384949	0.347963	0.466057	0.220406	0.512541	0.431998
0.620198	0.417479	0.850907	0.381177	0.347797	0.464298	0.196362	0.511908	0.431998
0.619198	0.417272	0.849439	0.381177	0.347414	0.462858	0.162002	0.511577	0.431998
0.618876	0.415383	0.849017	0.381177	0.346416	0.461124	0.162002	0.510001	0.424617
0.617142	0.414719	0.848569	0.379999	0.345601	0.460722	0.16	0.50938	0.421461
0.617142	0.411428	0.848099	0.379999	0.34482	0.459311	0.12706	0.508234	0.415059
0.615385	0.411428	0.847059	0.377706	0.342856	0.454738		0.502786	0.414863
0.61477	0.409655	0.845216	0.377143	0.342856	0.452093		0.502325	0.413616
0.614635	0.408647	0.843551	0.374401	0.341399	0.450987		0.501177	0.411428
0.612285	0.407999	0.839999	0.373846	0.341051	0.449107		0.501121	0.409655
0.612	0.404127	0.83613	0.373333	0.341051	0.446897		0.501121	0.408889
0.612	0.403425	0.83613	0.372413	0.339703	0.443498		0.49515	0.407831
0.611682	0.403121	0.834059	0.371804	0.338312	0.436364		0.49323	0.403737
0.610436	0.4	0.830768	0.370286	0.338088	0.4337		0.49091	0.403737
0.607498	0.4	0.830768	0.369945	0.337957	0.431998		0.489598	0.401537
0.603529	0.397895	0.827999	0.369475	0.337501	0.431998		0.48932	0.398445
0.598809	0.395121	0.825881	0.367659	0.332903	0.431998		0.489055	0.396457
0.597445	0.394973	0.824046	0.367345	0.332309	0.431998		0.488571	0.396001
0.597178	0.392725	0.822858	0.367345	0.331286	0.428428		0.488571	0.393259
0.59478	0.391179	0.82209	0.3661	0.32832	0.425455		0.488076	0.392725
0.594001	0.389774	0.820252	0.364045	0.327726	0.415383		0.484139	0.391498
0.592939	0.389774	0.819311	0.363564	0.326037	0.414781		0.483985	0.391498
0.58909	0.389509	0.818182	0.363363	0.326037	0.41294		0.483581	0.391179
0.5832	0.385715	0.815743	0.361584	0.322386	0.411428		0.478168	0.390253
0.577832	0.384	0.814425	0.359999	0.320475	0.411428		0.47593	0.388314
0.575409	0.383226	0.813913	0.359999	0.319527	0.411428		0.475713	0.386867
0.574178	0.381177	0.811103	0.359999	0.314702	0.400644		0.473144	0.385715
0.57375	0.381177	0.809997	0.356698	0.314563	0.395725		0.469566	0.385221
0.572184	0.381177	0.809997	0.356288	0.314009	0.392725		0.469566	0.375896
0.569454	0.380516	0.809997	0.356044	0.309768	0.392725		0.469266	0.375652
0.568422	0.379638	0.809997	0.355765	0.308571	0.390856		0.468137	0.373193
0.568422	0.377998	0.809997	0.354096	0.305659	0.376432		0.467999	0.370907
0.567459	0.377143	0.809997	0.352869	0.305217	0.371614		0.465229	0.370907
0.566556	0.37449	0.808849	0.352653	0.304614	0.364673		0.464811	0.370814
0.563479	0.373846	0.808493	0.351999	0.303157	0.359999		0.464811	0.368781
0.561599	0.372413	0.807805	0.351132	0.303157	0.320001		0.459212	0.356757
0.561599	0.371249	0.805421	0.348385	0.301396	0.312288		0.458629	0.348923
0.561039	0.366791	0.803721	0.348056	0.301154	0.280519		0.458546	0.342439
0.557419	0.365806	0.803721	0.345601	0.294546	0.264001		0.458022	0.312453
0.553846	0.359999	0.803721	0.345125	0.29288	0.205713		0.456337	0.311999
0.553171	0.359999	0.799998	0.341693	0.29288			0.45551	0.308571
0.551998	0.359999	0.7992	0.340673	0.287998	1.00465		0.4536	0.299275
0.551488	0.359999	0.798905	0.340275	0.287998	0.873191		0.452904	0.196362
0.551018	0.355765	0.798262	0.338312	0.273802	0.863999		0.452274
0.550589	0.353078	0.797538	0.338312	0.271887	0.830768		0.450987	1.23429
0.550589	0.352653	0.796424	0.33376	0.264001	0.808162		0.450783	1.11086
0.549998	0.346416	0.79579	0.333424	0.257144	0.789229		0.45	1.08
0.54806	0.345601	0.79579	0.333424	0.246857	0.782608		0.449229	1.05923
0.547827	0.34407	0.794481	0.332309	0.24	0.771427		0.448525	1.03562
0.546206	0.339776	0.793471	0.330001	0.231428	0.762351		0.448301	1.024
0.545144	0.332309	0.792363	0.327271	0.230399	0.755997		0.448301	1.01721
0.539998	0.320001	0.787763	0.3253	0.229091	0.747692		0.446897	0.99692
0.539998	0.317647	0.785453	0.323353	0.225001	0.744827		0.443836	0.981819
0.539998	0.317066	0.785453	0.32217	0.223446	0.740569		0.443258	0.971997
0.539998	0.315506	0.779999	0.3217	0.218426	0.735319		0.441361	0.970787
0.539998	0.314182	0.779014	0.320382	0.202016	0.730287		0.440815	0.967164
0.539998	0.308571	0.778844	0.319092	0.134999	0.726727		0.439645	0.925714
0.539998	0.308571	0.778235	0.313547	0.119999	0.719997		0.43948	0.917999
0.536558	0.308571	0.7776	0.3132	0.115201	0.71122		0.438259	0.902687
0.535538	0.305998	0.775382	0.313042	0.0712092	0.710526		0.435304	0.900806
0.533793	0.303157	0.771958	0.312188		0.710138		0.431998	0.898687
0.532601	0.296471	0.771427	0.311999	1.08	0.708388		0.431998	0.892175
0.532601	0.294546	0.771427	0.310683	0.832772	0.705742		0.428937	0.887999
0.531338	0.291893	0.771427	0.309956	0.786858	0.697498		0.426978	0.884818
0.531146	0.291429	0.771427	0.308571	0.785453	0.695592		0.426876	0.879997
0.529811	0.287998	0.76737	0.305659	0.785453	0.695172		0.426496	0.86961
0.529547	0.287998	0.76557	0.302099	0.751823	0.694285		0.425106	0.867613
0.52683	0.284212	0.758571	0.301396	0.744827	0.69		0.424049	0.863999
0.526151	0.281739	0.755997	0.301396	0.744827	0.688143		0.423924	0.863999
0.525712	0.27227	0.755468	0.301154	0.738947	0.687271		0.419857	0.858459
0.52457	0.269999	0.754698	0.300985	0.738947	0.684001		0.418066	0.854327
0.523636	0.266665	0.753823	0.300758	0.738947	0.68		0.416552	0.84954
0.523125	0.266665	0.75236	0.300001	0.710798	0.66804		0.415168	0.847999
0.518398	0.266665	0.75214	0.300001	0.703998	0.666781		0.414246	0.847851
0.517182	0.264491	0.750315	0.298284	0.702439	0.664614		0.414246	0.836533
0.516521	0.264491	0.74903	0.291237	0.698822	0.662728		0.412831	0.83613
0.516521	0.263416	0.747168	0.290324	0.697989	0.660497		0.411428	0.834544
0.516521	0.256272	0.746763	0.287998	0.693774	0.659998		0.410342	0.829089
0.516521	0.254116	0.746666	0.287622	0.69261	0.650957		0.405001	0.828492
0.515819	0.249229	0.744325	0.283794	0.690224	0.647998		0.402711	0.818182
0.515453	0.246857	0.742499	0.282858	0.686951	0.644605		0.401861	0.816583
0.511577	0.24	0.742499	0.282858	0.68454	0.643402		0.398297	0.814425
0.510546	0.223446	0.741492	0.280519	0.68	0.636427		0.398156	0.812475
0.509758	0.166154	0.736649	0.277714	0.677648	0.635292		0.397057	0.812475
0.509758	0.16	0.735319	0.275744	0.672243	0.635292		0.393559	0.812028
0.505947	0.16	0.732855	0.272841	0.670346	0.633601		0.392725	0.809997
0.501427	0.119999	0.732855	0.269999	0.670346	0.632864		0.391409	0.809202
0.500486	0.108	0.731611	0.269999	0.669296	0.632196		0.389388	0.806198
0.496991		0.728674	0.267427	0.668569	0.631697		0.389388	0.804704
0.49091		0.727579	0.263416	0.667826	0.631382		0.383226	0.802283
0.487743		0.727461	0.260688	0.667057	0.628862		0.382343	0.799998
0.487743		0.725757	0.254116	0.666384	0.625261		0.378437	0.792277
0.486761		0.725497	0.24	0.65739	0.625261		0.373741	0.789605
0.486487		0.719997	0.216	0.655714	0.622373		0.371544	0.789605
0.486		0.719997	0.216	0.652076	0.621369		0.371078	0.788246
0.485743		0.719997	0.185143	0.648458	0.620687		0.369044	0.785453
0.483581		0.719997	0.15158	0.647998	0.619198		0.367198	0.785453
0.479999		0.712904	0.150697	0.643402	0.617142		0.363274	0.782173
0.479999		0.7128	0.0709865	0.641248	0.617142		0.36208	0.780723
0.479999		0.708751	0.734844	0.637853	0.617142		0.359999	0.780438
0.478033		0.708751	0.719997	0.634637	0.61565		0.358011	0.7776
0.477875		0.707256	0.65898	0.632196	0.615544		0.35446	0.768814
0.476618		0.70691	0.65739	0.629999	0.61316		0.345601	0.766453
0.474148		0.705304	0.647998	0.627783	0.612537		0.342856	0.762351
0.469566		0.703819	0.647089	0.627096	0.611682		0.342554	0.760562
0.468433		0.702001	0.638181	0.626565	0.607498		0.334513	0.758918
0.468433		0.700538	0.632196	0.625261	0.606123		0.332726	0.758918
0.459311		0.698822	0.623076	0.623353	0.604797		0.311353	0.757894
0.457227		0.697843	0.614635	0.621659	0.604797		0.29793	0.755997
0.452093		0.697323	0.601518	0.620553	0.603871		0.290769	0.755515
0.45		0.696774	0.59478	0.618288	0.60279		0.284212	0.755515
0.45		0.69528	0.591537	0.613894	0.602306		0.280305	0.755121
0.448301		0.693133	0.583783	0.612537	0.601043		0.27871	0.751303
0.446897		0.6912	0.578572	0.612118	0.600795		0.275675	0.746666
0.446897		0.68936	0.571426	0.609231	0.599999		0.252469	0.745413
0.445714		0.688695	0.570567	0.608067	0.599999		0.200001	0.744
0.443836		0.687271	0.566556	0.607998	0.599223			0.743608
0.441459		0.684221	0.561357	0.607998	0.596569			0.742764
0.435485		0.68374	0.558621	0.606741	0.594001			0.738947
0.431998		0.683263	0.549152	0.606042	0.58909			0.738
0.431998		0.680726	0.547201	0.604798	0.58909			0.73659
0.431998		0.679549	0.539998	0.60279	0.58909			0.733586
0.428428		0.679549	0.539998	0.601644	0.587753			0.732203
0.427922		0.676364	0.539998	0.601644	0.587182			0.73059
0.425455		0.675751	0.53838	0.601611	0.585762			0.73014
0.419419		0.673244	0.537759	0.599999	0.585288			0.729728
0.414719		0.672785	0.52898	0.599999	0.584151			0.72935
0.410706		0.672785	0.528001	0.599426	0.583783			0.72637
0.409264		0.669028	0.525405	0.599122	0.580645			0.726206
0.409089		0.667826	0.517182	0.598472	0.579129			0.72431
0.392725		0.667636	0.514285	0.598152	0.578026			0.723769
0.389509		0.664614	0.512999	0.597445	0.577675			0.719997
0.384295		0.664614	0.504225	0.597445	0.575999			0.719997
0.374875		0.664614	0.502818	0.595226	0.57484			0.719997
0.368781		0.664028	0.501121	0.593085	0.57306			0.718021
0.367659		0.660312	0.49846	0.591999	0.572055			0.717719
0.367659		0.659541	0.498043	0.591241	0.571035			0.716267
0.346076		0.658123	0.490307	0.590309	0.569672			0.71374
0.332309		0.65739	0.489836	0.59005	0.568422			0.712022
0.324001		0.655166	0.489055	0.587753	0.568422			0.71122
0.3217		0.654545	0.487743	0.584034	0.568422			0.710138
0.319092		0.653331	0.485394	0.583783	0.564924			0.710138
0.284212		0.653022	0.481443	0.579271	0.564324			0.708922
		0.652076	0.481242	0.579129	0.563479			0.708751
0.913845		0.649625	0.479999	0.576609	0.563169			0.707795
0.878644		0.647998	0.477875	0.575526	0.563032			0.705304
0.863999		0.647998	0.477693	0.575248	0.5625			0.704549
0.830768		0.646531	0.476472	0.57375	0.561848			0.695592
0.783		0.645196	0.476219	0.573452	0.561691			0.687271
0.76737		0.643845	0.476219	0.571987	0.561599			0.685383
0.755997		0.643402	0.47593	0.571765	0.560609			0.684876
0.753489		0.643143	0.475199	0.569998	0.560001			0.68
0.751303		0.641584	0.474148	0.569224	0.560001			0.679719
0.735319		0.640551	0.472227	0.568422	0.560001			0.678857
0.734398		0.640001	0.471722	0.567273	0.559285			0.677871
0.719997		0.640001	0.470865	0.566999	0.558203			0.677648
0.717426		0.638873	0.470324	0.566556	0.556981			0.672318
0.697639		0.638381	0.469566	0.564546	0.556876			0.670346
0.696774		0.636164	0.468678	0.563479	0.556699			0.670098
0.682106		0.636074	0.467999	0.562106	0.554336			0.666847
0.682106		0.636074	0.466365	0.561599	0.553846			0.664614
0.680871		0.635292	0.465726	0.55906	0.552858			0.662728
0.672785		0.632196	0.465686	0.558139	0.552271			0.661623
0.670346		0.631697	0.463805	0.549308	0.551488			0.656266
0.668569		0.631382	0.462858	0.54857	0.551488			0.655166
0.661936		0.63101	0.460801	0.54439	0.550874			0.653537
0.65739		0.629999	0.458393	0.541612	0.550801			0.65338
0.654545		0.628016	0.457329	0.539998	0.549818			0.649831
0.65266		0.625261		0.539998	0.549152			0.647998
0.649062		0.62366	0.877497	0.537367	0.547903			0.647998
0.645516		0.622822	0.863999	0.534433	0.547201			0.64174
0.642856		0.621818	0.863999	0.533333	0.546836			0.641248
0.635292		0.621369	0.799998	0.527441	0.545453			0.640551
0.629635		0.619998	0.785453	0.523636	0.544863			0.638873
0.627693		0.619533	0.785453	0.519722	0.542826			0.636521
0.624791		0.617142	0.778605	0.515951	0.539998			0.636
0.623999		0.617142	0.775382	0.515078	0.539998			0.635886
0.617142		0.610436	0.755997	0.513787	0.539998			0.635292
0.615744		0.607498	0.747692	0.51366	0.539998			0.635292
0.614635		0.607498	0.738227	0.51321	0.539998			0.632729
0.612		0.606575	0.733212	0.510184	0.539998			0.628862
0.610908		0.606314	0.719997	0.508234	0.536802			0.626401
0.60845		0.605607	0.703256	0.506667	0.533333			0.623076
0.606314		0.603777	0.694672	0.506547	0.532985			0.621177
0.605106		0.599999	0.694285	0.505533	0.531694			0.619998
0.604797		0.599999	0.69049	0.503999	0.530526			0.617142
0.603529		0.599999	0.69	0.500867	0.529411			0.612146
0.603529		0.596569	0.677648	0.499592	0.52898			0.608987
0.60279		0.596419	0.674043	0.499501	0.525405			0.607498
0.601043		0.591156	0.672785	0.49906	0.525405			0.607258
0.599999		0.58909	0.672785	0.49846	0.525405			0.604797
0.5962		0.582731	0.668569	0.49846	0.524183			0.604797
0.595514		0.581538	0.667466	0.498139	0.523959			0.603871
0.592684		0.578026	0.659998	0.496991	0.523636			0.60279
0.58909		0.576697	0.656842	0.494999	0.522195			0.599999
0.588385		0.576697	0.6525	0.494749	0.520715			0.599621
0.58426		0.575999	0.64951	0.492151	0.520715			0.599122
0.582857		0.57306	0.647998	0.485854	0.520001			0.597072
0.579998		0.571765	0.647998	0.485505	0.519232			0.596946
0.578572		0.568422	0.647394	0.483707	0.515819			0.588118
0.575999		0.566214	0.646531	0.482492	0.515819			0.583783
0.575999		0.560552	0.642643	0.481982	0.514285			0.5832
0.575474		0.557419	0.640001	0.481982	0.514285			0.578269
0.574678		0.555883	0.639185	0.481186	0.513728			0.575567
0.57375		0.555429	0.638181	0.48051	0.512999			0.569998
0.57375		0.54857	0.632569	0.479999	0.510379			0.569765
0.572531		0.547607	0.632196	0.479999	0.509432			0.569672
0.569998		0.539998	0.631169	0.476167	0.508234			0.568422
0.569998		0.539998	0.630486	0.474148	0.508234			0.566431
0.56681		0.539998	0.627096	0.472741	0.508234			0.564075
0.564924		0.539998	0.626667	0.471548	0.508234			0.562416
0.564179		0.533645	0.617142	0.471272	0.508234			0.561848
0.564075		0.532601	0.607498	0.47077	0.508234			0.561848
0.563479		0.52683	0.606941	0.470494	0.507128			0.561599
0.563479		0.521377	0.606741	0.470324	0.506249			0.558806
0.563479		0.511999	0.603529	0.469566	0.504933			0.556699
0.562814		0.506937	0.60279	0.466558	0.503299			0.556362
0.561599		0.499592	0.600462	0.465884	0.503013			0.556362
0.560001		0.479999	0.600405	0.464298	0.502325			0.550589
0.560001		0.431998	0.598379	0.462858	0.500486			0.549818
0.559788		0.431998	0.596841	0.460466	0.494999			0.54857
0.558477		0.431998	0.595863	0.460328	0.494456			0.548257
0.558368		0.431998	0.595587	0.459575	0.493714			0.539998
0.5568		0.416841	0.595336	0.459268	0.493714			0.539998
0.556563		0.413616	0.59478	0.45818	0.493333			0.539998
0.555429		0.39857	0.593085	0.454738	0.49091			0.539998
0.554939		0.397057	0.590767	0.449666	0.49091			0.539998
0.549818		0.332309	0.590451	0.445447	0.487743			0.539998
0.549473			0.58909	0.444979	0.486761			0.537143
0.549276		1.57091	0.586956	0.441817	0.486551			0.53617
0.54794		1.56414	0.586526	0.440524	0.486281			0.535134
0.547607		1.45946	0.586425	0.434285	0.486			0.534509
0.543311		1.44	0.585762	0.431998	0.485394			0.532497
0.539998		1.36	0.585001	0.431998	0.484899			0.530526
0.539998		1.32923	0.583783	0.430924	0.484681			0.513564
0.539998		1.296	0.580839	0.427922	0.479999			0.512684
0.539998		1.27058	0.580499	0.424918	0.479999			0.512541
0.536646		1.27058	0.579129	0.423924	0.479999			0.508572
0.53631		1.24363	0.578572	0.420781	0.479999			0.507383
0.534545		1.23429	0.57702	0.414863	0.479999			0.503013
0.533841		1.22954	0.575999	0.409089	0.479999			0.501427
0.533645		1.215	0.575999	0.408647	0.479999			0.494837
0.533333		1.19631	0.572531	0.406016	0.476472			0.494658
0.532393		1.18957	0.570567	0.402711	0.47593			0.49091
0.529811		1.18957	0.567805	0.402711	0.475471			0.487973
0.52683		1.188	0.566105	0.398297	0.474148			0.48427
0.52683		1.18286	0.563479	0.39689	0.473685			0.482825
0.52683		1.17818	0.562907	0.394287	0.473424			0.479999
0.526151		1.17529	0.56269	0.388801	0.4725			0.476472
0.525712		1.152	0.562605	0.387691	0.471272			0.475088
0.522195		1.13143	0.560001	0.380419	0.471272			0.470494
0.52048		1.12909	0.559422	0.378946	0.47077			0.467028
0.520364		1.12	0.558087	0.378394	0.470494			0.465367
0.519495		1.11484	0.556981	0.377998	0.470051			0.464298
0.519495		1.10919	0.555791	0.375652	0.468433			0.464132
0.518881		1.10571	0.55032	0.373846	0.46777			0.463446
0.517684		1.10512	0.548357	0.372413	0.467411			0.455352
0.514285		1.1025	0.547073	0.366791	0.465584			0.452093
0.508234		1.10204	0.546507	0.364673	0.463805			0.446327
0.507271		1.08	0.545244	0.361723	0.462858			0.444704
0.506667		1.08	0.539998	0.357291	0.461538			0.431998
0.506249		1.08	0.539998	0.355068	0.460801			0.412362
0.504933		1.08	0.539998	0.352045	0.46			0.401607
0.501817		1.07275	0.539998	0.351627	0.459			0.38919
0.498		1.06787	0.536879	0.347921	0.45818			0.379183
0.496396		1.06412	0.536802	0.343637	0.455778			0.34468
0.495178		1.06388	0.533841	0.341051	0.454738
0.494999		1.06105	0.533745	0.338181	0.454014
0.493924		1.05818	0.533333	0.335675	0.451837
0.492306		1.05459	0.531146	0.332309	0.45
0.49091		1.05459	0.529811	0.331715	0.45
0.489055		1.04625	0.524442	0.324001	0.447806
0.487058		1.04143	0.522946	0.324001	0.447566
0.486357		1.04096	0.522858	0.324001	0.444704
0.48233		1.04049	0.520209	0.322259	0.444111
0.478287		1.03878	0.519068	0.319435	0.443368
0.476472		1.0368	0.517182	0.317647	0.443368
0.474148		1.0368	0.516983	0.317647	0.44241
0.473583		1.03304	0.515556	0.317647	0.442205
0.473144		1.02857	0.514285	0.312511	0.440815
0.4725		1.02508	0.512067	0.308571	0.440254
0.46985		1.02508	0.511999	0.308571	0.439998
0.468433		1.02369	0.510546	0.300397	0.439323
0.466858		1.02194	0.508234	0.29793	0.43875
0.466479		1.01908	0.507383	0.291237	0.438259
0.466286		1.00918	0.506667	0.27871	0.436854
0.465884		1.008	0.50611	0.274285	0.431998
0.462858		1.008	0.503999	0.266301	0.431998
0.461963		1.008	0.503999	0.257144	0.431998
0.460328		1.008	0.502325	0.237798	0.431998
0.459922		1.00286	0.501817	0.216	0.431998
0.456337		0.99692	0.501817	0.21147	0.431998
0.454092		0.987429	0.501427	0.200928	0.428823
0.448832		0.985497	0.499834	0.196362	0.428106
0.446897		0.984491	0.497984	0.169411	0.424918
0.443836		0.981819	0.496114	0.148966	0.424284
0.437466		0.981819	0.494658	0.148966	0.423924
0.431998		0.981819	0.494456	0.0403729	0.422068
0.418774		0.980755	0.493043		0.421461
0.418066		0.978114	0.491497		0.421461
0.416251		0.975998	0.49003		0.419998
0.402984		0.971997	0.487216		0.419998
0.401861		0.971526	0.485834		0.416572
0.401311		0.96897	0.484412		0.415383
0.39724		0.968273	0.48233		0.415383
0.39724		0.966313	0.479999		0.413218
0.389509		0.965106	0.478287		0.41294
0.385299		0.962181	0.477472		0.410053
0.384		0.96	0.476847		0.409264
0.373155		0.956066	0.475021		0.408647
0.370286		0.952938	0.471272		0.408647
0.362572		0.950768	0.467628		0.406586
0.358011		0.945	0.466838		0.405001
0.355765		0.945	0.466811		0.405001
0.353795		0.944264	0.462858		0.405001
0.351627		0.941952	0.462858		0.4
0.336393		0.94114	0.462452		0.4
0.327271		0.935999	0.46121		0.390856
0.320001		0.935256	0.460466		0.385715
0.308571		0.93356	0.459803		0.384
0.254116		0.930001	0.459		0.381577
		0.930001	0.456337		0.381577
0.874284		0.925714	0.452904		0.381177
0.719997		0.925714	0.452093		0.370286
0.719997		0.925714	0.451916		0.369475
0.694285		0.925714	0.45		0.368781
0.654545		0.918186	0.447365		0.359999
0.619198		0.917999	0.446897		0.359999
0.61132		0.914823	0.445934		0.359999
0.5962		0.913845	0.445714		0.359999
0.5951		0.913845	0.444979		0.355444
0.58909		0.91317	0.444704		0.352653
0.587518		0.910189	0.444256		0.351
0.583783		0.908308	0.441546		0.350269
0.578968		0.904185	0.440815		0.341051
0.577675		0.904185	0.4337		0.341051
0.575999		0.903272	0.431998		0.341051
0.570567		0.900001	0.423043		0.332309
0.563479		0.899187	0.421461		0.329492
0.557998		0.893791	0.421199		0.325161
0.553171		0.892175	0.418652		0.324001
0.549818		0.889409	0.418066		0.320001
0.539998		0.885246	0.417479		0.317647
0.539998		0.883634	0.41706		0.309802
0.533933		0.881633	0.416841		0.308571
0.529411		0.879426	0.414246		0.308571
0.528001		0.878644	0.410577		0.308571
0.52683		0.863999	0.40403		0.308571
0.526151		0.863999	0.403737		0.30494
0.523636		0.863999	0.403199		0.300001
0.522195		0.861761	0.400644		0.298422
0.519232		0.859699	0.4		0.29288
0.518398		0.858341	0.399271		0.290769
0.516923		0.856216	0.391763		0.287998
0.516521		0.853333	0.388801		0.287998
0.514516		0.852109	0.388123		0.287998
0.509432		0.846485	0.384657		0.281739
0.507128		0.845216	0.381177		0.281739
0.506937		0.843973	0.376362		0.273802
0.506547		0.839999	0.37192		0.269999
0.501217		0.832673	0.367198		0.269999
0.500867		0.830768	0.364673		0.269999
0.49846		0.829565	0.354627		0.269999
0.497777		0.828838	0.343312		0.269999
0.49323		0.827234	0.339429		0.269999
0.491584		0.826435	0.334285		0.265846
0.489459		0.821593	0.334285		0.263416
0.488686		0.81804	0.324001		0.261098
0.486		0.812673	0.287998		0.251999
0.48558		0.812161	0.259201		0.251999
0.485394		0.809997			0.249229
0.484139		0.809997	0.879518		0.249229
0.479999		0.807874	0.823152		0.243378
0.474148		0.807272	0.816583		0.233514
0.474148		0.804704	0.789229		0.216
0.473424		0.804253	0.776629		0.162813
0.473306		0.803721	0.733586		0.139355
0.473144		0.802283	0.728469		0.119999
0.472994		0.798905	0.7277		0.0830769
0.471272		0.797144	0.725975		0.0771425
0.470205		0.789229	0.722834
0.468835		0.788105	0.719997
0.466779		0.780723	0.71252
0.466365		0.779999	0.708751
0.461794		0.776979	0.708
0.46121		0.77434	0.700538
0.459945		0.773417	0.696391
0.457412		0.773051	0.695413
0.454738		0.772553	0.688965
0.454738		0.771427	0.683192
0.452388		0.770526	0.679719
0.451526		0.766045	0.679246
0.451341		0.764997	0.674998
0.451086		0.764997	0.663805
0.444704		0.763903	0.660584
0.443077		0.762796	0.660262
0.443077		0.762351	0.659496
0.442732		0.758296	0.656352
0.44241		0.757402	0.655714
0.442205		0.754449	0.655166
0.440815		0.753489	0.653022
0.439837		0.752457	0.6525
0.435222		0.75236	0.650168
0.434716		0.751303	0.647998
0.434481		0.749998	0.644777
0.433445		0.746666	0.641396
0.429999		0.744827	0.638181
0.428106		0.744827	0.633601
0.427613		0.744325	0.633384
0.427119		0.742204	0.630948
0.426316		0.741492	0.629999
0.426316		0.739726	0.624906
0.425455		0.739726	0.624456
0.424918		0.737246	0.621508
0.424284		0.736876	0.621214
0.423094		0.73325	0.620426
0.422608		0.732855	0.617142
0.422608		0.728372	0.613743
0.418066		0.727129	0.612973
0.415946		0.725497	0.610285
0.415113		0.72335	0.60937
0.413616		0.719997	0.608153
0.413116		0.719997	0.606042
0.41294		0.719997	0.605273
0.410401		0.719997	0.604797
0.410401		0.719997	0.60398
0.409846		0.716727	0.603001
0.408995		0.713009	0.602306
0.408647		0.708196	0.601518
0.408292		0.706351	0.595019
0.407546		0.705742	0.593113
0.404611		0.705304	0.592149
0.402352		0.703819	0.59178
0.401861		0.702651	0.590625
0.401861		0.702001	0.58909
0.401861		0.702001	0.58909
0.400644		0.696112	0.587037
0.400644		0.694285	0.585762
0.4		0.693974	0.581538
0.4		0.6912	0.581538
0.398445		0.690411	0.575999
0.394435		0.688695	0.575999
0.394287		0.684876	0.571353
0.392725		0.684876	0.567273
0.392725		0.684876	0.566214
0.387692		0.682106	0.565879
0.385715		0.68044	0.562368
0.384949		0.68	0.560231
0.384657		0.67422	0.55906
0.384501		0.669875	0.555831
0.384		0.66804	0.552556
0.381177		0.667636	0.551998
0.380283		0.662575	0.550589
0.379459		0.660617	0.548481
0.378701		0.660262	0.548309
0.377621		0.65739	0.547201
0.37618		0.65739	0.542714
0.373193		0.654545	0.539998
0.372134		0.651426	0.539998
0.370286		0.650205	0.539998
0.367659		0.642163	0.537795
0.367659		0.641248	0.536114
0.359999		0.632196	0.535538
0.359999		0.631382	0.533333
0.359999		0.630384	0.531694
0.359999		0.629999	0.530251
0.355765		0.629292	0.528672
0.355262		0.627096	0.528001
0.35446		0.626401	0.520715
0.350768		0.625653	0.514285
0.350269		0.624579	0.514285
0.348749		0.620838	0.510411
0.342856		0.620598	0.510001
0.341051		0.617142	0.506249
0.339174		0.608067	0.505533
0.338822		0.603724	0.504826
0.337501		0.593588	0.503999
0.335173		0.583783	0.502858
0.334972		0.578269	0.501972
0.332309		0.575999	0.501678
0.324001		0.57306	0.500001
0.322386		0.571765	0.499834
0.321854		0.566556	0.499699
0.32108		0.560609	0.49846
0.31814		0.552556	0.497559
0.297485		0.539998	0.495285
0.291893		0.539998	0.494999
0.290419		0.534193	0.493924
0.288493		0.532601	0.491707
0.287998		0.514285	0.49091
0.285282		0.4725	0.49091
0.281739		0.440815	0.488841
0.276924		0.308571	0.488686
0.274909		0.266301	0.487743
0.269999			0.486884
0.251999			0.484068
0.24			0.482825
0.24			0.48051
0.226179			0.479999
			0.477958
1.12			0.477001
0.96			0.476883
0.902276			0.475199
0.875675			0.4725
0.863999			0.467028
0.863999			0.4644
0.859092			0.46373
0.856551			0.461538
0.846185			0.461124
0.845216			0.461124
0.841557			0.458822
0.839999			0.457826
0.839999			0.457227
0.83613			0.456738
0.83314			0.454738
0.830768			0.453435
0.825881			0.453333
0.8208			0.451137
0.820252			0.448525
0.819311			0.448301
0.819311			0.44536
0.816001			0.444704
0.816001			0.443836
0.807474			0.443443
0.800285			0.44241
0.79579			0.442044
0.792658			0.441817
0.791999			0.440308
0.785453			0.439645
0.785453			0.439119
0.781277			0.431998
0.779381			0.428639
0.779381			0.422346
0.7776			0.419998
0.7776			0.416063
0.77637			0.412214
0.776251			0.40771
0.776251			0.407546
0.773731			0.402485
0.772843			0.401709
0.771427			0.396734
0.769901			0.395491
0.755997			0.390696
0.751303			0.38919
0.751033			0.384408
0.75023			0.381601
0.748515			0.372413
0.747692			0.371249
0.745485			0.368781
0.742929			0.366546
0.742499			0.366314
0.739566			0.359999
0.738947			0.356869
0.736362			0.352653
0.726823			0.351999
0.724235			0.341051
0.719997			0.329492
0.719997			0.325161
0.719997			0.308571
0.719997			0.305217
0.719997			0.301396
0.719997			0.262701
0.719997			0.12706
0.717121			0.123429
0.712904			0.0981832
0.712578			0.0685712
0.71071
0.707256			0.728998
0.705304			0.708079
0.70484			0.6853
0.702776			0.682106
0.701538			0.659706
0.701151			0.647998
0.699084			0.643521
0.696774			0.635742
0.695592			0.633101
0.693578			0.617966
0.69283			0.617142
0.692439			0.604797
0.69204			0.598554
0.691766			0.59178
0.685565			0.591537
0.682529			0.580786
0.681426			0.578115
0.678857			0.560432
0.677648			0.558203
0.677648			0.549473
0.674287			0.539998
0.673244			0.538079
0.671069			0.529547
0.670978			0.525405
0.665864			0.523636
0.664614			0.521377
0.660225			0.520001
0.660225			0.514285
0.659998			0.508234
0.65793			0.49846
0.655714			0.497527
0.653022			0.497456
0.651969			0.496047
0.648762			0.492972
0.647998			0.479999
0.647998			0.470324
0.64598			0.4536
0.645196			0.437466
0.645069			0.436854
0.644605			0.431998
0.644211			0.425372
0.642856			0.421461
0.642491			0.405516
0.64174			0.403737
0.639185			0.398297
0.638873			0.393644
0.638779			0.387692
0.636631			0.370286
0.636427			0.367659
0.636164			0.363851
0.635292			0.359999
0.635292			0.356288
0.632729			0.351
0.631578			0.350269
0.63101			0.348385
0.63101			0.308571
0.630429			0.29288
0.629999			0.273105
0.629999			0.224414
0.628363
0.627096			0.791999
0.627096			0.785453
0.627096			0.6912
0.627096			0.609231
0.625571			0.59005
0.625482			0.58909
0.625261			0.563942
0.623999			0.561599
0.623076			0.555429
0.617142			0.554027
0.617142			0.55032
0.617142			0.549818
0.613894			0.541909
0.613637			0.539998
0.612973			0.527781
0.612			0.52683
0.607498			0.522946
0.606941			0.51896
0.606314			0.516923
0.606314			0.515819
0.606314			0.514688
0.606314			0.511577
0.604797			0.508644
0.604797			0.508234
0.600795			0.508234
0.59937			0.498913
0.599305			0.49846
0.598992			0.495285
0.597669			0.492353
0.597445			0.490601
0.597445			0.489895
0.597445			0.485505
0.597445			0.479999
0.596683			0.479999
0.594971			0.477472
0.594285			0.47593
0.593588			0.473879
0.592939			0.471722
0.589916			0.467892
0.587182			0.458629
0.586284			0.451711
0.586045			0.450236
0.583067			0.448942
0.582857			0.44654
0.581538			0.439853
0.581142			0.435791
0.579513			0.435579
0.578572			0.434555
0.577041			0.434414
0.575999			0.428702
0.575999			0.421015
0.573835			0.419998
0.57356			0.415731
0.573452			0.414246
0.573334			0.410127
0.572616			0.407121
0.572531			0.403515
0.572108			0.402711
0.571765			0.39484
0.570152			0.388618
0.568422			0.387692
0.566999			0.387692
0.566556			0.377477
0.564324			0.373535
0.564324			0.368781
0.563479			0.359999
0.563479			0.357791
0.561949			0.354855
0.561599			0.347143
0.561176			0.339429
0.561039			0.335999
0.560001			0.332309
0.560001			0.328694
0.560001			0.327641
0.557882			0.327271
0.557419			0.324001
0.556362			0.316099
0.556169			0.314998
0.553846			0.294546
0.552958			0.279262
0.548437			0.273802
0.547201			0.261289
0.547201			0.254116
0.543776			0.242451
0.539998			0.232614
0.539998			0.205713
0.539998
0.539998			0.759999
0.539998			0.647998
0.539998			0.597072
0.536646			0.59478
0.536274			0.577424
0.535046			0.561039
0.533933			0.557419
0.531518			0.554593
0.53069			0.54871
0.529811			0.545934
0.529411			0.539998
0.52898			0.53617
0.52683			0.536058
0.52683			0.531146
0.52457			0.520001
0.524271			0.519495
0.520113			0.519303
0.518398			0.518398
0.517684			0.510968
0.515819			0.510001
0.515146			0.510001
0.514285			0.506937
0.514285			0.506249
0.509141			0.505824
0.508234			0.505533
0.508234			0.503999
0.505533			0.502325
0.504933			0.502166
0.501427			0.501427
0.499834			0.50103
0.49846			0.494043
0.49846			0.484681
0.49846			0.484139
0.495737			0.483933
0.495412			0.483581
0.495217			0.479999
0.49417			0.476219
0.493714			0.474148
0.49091			0.4725
0.486487			0.47077
0.486234			0.467999
0.486			0.466732
0.485085			0.465884
0.481242			0.465
0.479999			0.462858
0.479999			0.462858
0.478915			0.455293
0.477108			0.455207
0.475199			0.452904
0.475199			0.451837
0.474148			0.451637
0.473808			0.45
0.463268			0.45
0.462858			0.45
0.462858			0.45
0.462858			0.45
0.459575			0.448832
0.459575			0.445714
0.459575			0.445498
0.459575			0.444704
0.459401			0.444256
0.45818			0.44241
0.456337			0.442284
0.456337			0.442205
0.454738			0.440191
0.454738			0.437466
0.454738			0.436595
0.453911			0.435791
0.4536			0.431998
0.451837			0.431998
0.448734			0.431998
0.447998			0.431998
0.446897			0.431998
0.443077			0.42985
0.443077			0.428937
0.431998			0.424284
0.431998			0.423528
0.431998			0.422937
0.427577			0.421461
0.426978			0.421461
0.424718			0.421015
0.424284			0.420323
0.421461			0.413616
0.419658			0.412362
0.4185			0.408191
0.417545			0.407546
0.417545			0.407546
0.415383			0.405001
0.411428			0.405001
0.410401			0.405001
0.409928			0.397895
0.408647			0.397131
0.40846			0.39484
0.405001			0.392725
0.403199			0.389774
0.402352			0.38919
0.397895			0.387692
0.392725			0.381177
0.377143			0.381177
0.377143			0.378557
0.377143			0.377143
0.375652			0.373846
0.372413			0.373333
0.370286			0.372413
0.368781			0.370286
0.358507			0.370286
0.348385			0.368571
0.348385			0.367198
0.348385			0.361944
0.343637			0.359999
0.339266			0.359999
0.330001			0.356288
0.322105			0.356044
0.320001			0.353454
0.320001			0.348385
0.320001			0.347584
0.314998			0.346567
0.314998			0.345601
0.308571			0.34388
0.308571			0.343637
0.298722			0.339429
0.294546			0.336625
0.291893			0.332309
0.287998			0.320001
0.260241			0.317647
0.23226			0.3168
0.220406			0.316099
0.115201			0.316099
0.0899983			0.308571
			0.307279
1.17818			0.303287
0.850907			0.302399
0.775923			0.302222
0.751303			0.291429
0.749753			0.291237
0.744827			0.290151
0.742499			0.289379
0.740569			0.28328
0.736362			0.28328
0.733586			0.281739
0.732855			0.276924
0.731077			0.276924
0.719997			0.275744
0.719997			0.275744
0.719997			0.274576
0.719997			0.274028
0.719997			0.269999
0.710886			0.266665
0.705304			0.252767
0.700217			0.249229
0.700001			0.247869
0.698822			0.24
0.696774			0.24
0.695592			0.229789
0.694285			0.227368
0.693333			0.227368
0.6912			0.225001
0.69			0.216
0.68936			0.209708
0.687271			0.202499
0.687271			0.18217
0.676364			0.166154
0.674998			0.162582
0.674998
0.670346
0.668904
0.667057
0.666384
0.664614
0.658123
0.655714
0.654545
0.65266
0.650957
0.649913
0.647998
0.647998
0.647998
0.644211
0.640001
0.640001
0.638181
0.636922
0.633601
0.629999
0.623999
0.621369
0.617142
0.617142
0.617142
0.617142
0.617142
0.611682
0.61132
0.610908
0.610074
0.609882
0.609231
0.608727
0.607498
0.606741
0.606042
0.604797
0.604797
0.603871
0.603529
0.599999
0.599999
0.596248
0.594285
0.594001
0.593685
0.593405
0.586664
0.586664
0.58613
0.5832
0.582262
0.580297
0.578717
0.575999
0.575999
0.575999
0.57306
0.572531
0.571241
0.571035
0.570567
0.569998
0.569672
0.569099
0.568422
0.568422
0.566556
0.565714
0.564324
0.564179
0.563479
0.563479
0.5625
0.560432
0.560001
0.560001
0.559285
0.558621
0.557419
0.557419
0.556876
0.554593
0.553388
0.553171
0.552556
0.552271
0.551018
0.550187
0.546206
0.545453
0.543885
0.543484
0.539998
0.539998
0.539998
0.539998
0.539998
0.539998
0.539998
0.539998
0.539998
0.539998
0.536558
0.536274
0.532733
0.532601
0.531694
0.531694
0.531146
0.530526
0.530526
0.528001
0.527242
0.525405
0.525405
0.524858
0.524858
0.52457
0.522195
0.521377
0.518398
0.517182
0.516226
0.515819
0.515453
0.514285
0.514285
0.513266
0.512541
0.511577
0.509432
0.508234
0.508234
0.506937
0.504933
0.504933
0.503999
0.503557
0.502759
0.502639
0.502325
0.50076
0.500212
0.499834
0.49846
0.49846
0.49846
0.496551
0.494456
0.494456
0.493714
0.492151
0.49091
0.49091
0.49091
0.49091
0.487743
0.487743
0.484487
0.481621
0.479999
0.479999
0.479999
0.479999
0.477021
0.476472
0.4725
0.4725
0.471722
0.471272
0.47077
0.47077
0.470612
0.470612
0.469566
0.467462
0.466365
0.466365
0.465
0.464132
0.464132
0.463892
0.462858
0.462858
0.462858
0.462858
0.462858
0.459575
0.459
0.453966
0.453104
0.452904
0.448301
0.44536
0.44536
0.443077
0.443077
0.443077
0.443077
0.44241
0.441817
0.439323
0.438043
0.431998
0.431998
0.431998
0.431998
0.431998
0.431998
0.431998
0.431998
0.429317
0.428702
0.421461
0.419998
0.415383
0.415383
0.412362
0.409655
0.407312
0.406957
0.406336
0.405001
0.405001
0.401861
0.396734
0.392725
0.392725
0.392725
0.392725
0.388801
0.385715
0.385715
0.381177
0.371249
0.368373
0.3661
0.3661
0.365538
0.362235
0.362235
0.359999
0.359999
0.348385
0.347143
0.347143
0.335999
0.327271
0.325477
0.324001
0.311538
0.27871
0.274285
0.150697
0.377166
0.360561
0.380209
0.358186
0.353326
0.340966
0.331996
0.728091
0.709252
0.70008
0.695592
0.69049
0.687998
0.687819
0.687271
0.687271
0.682939
0.67463
0.673662
0.667057
0.660703
0.65898
0.658721
0.653944
0.653022
0.647998
0.643845
0.642532
0.642163
0.642163
0.641584
0.633253
0.63101
0.627783
0.626086
0.625261
0.625261
0.62199
0.618321
0.613637
0.606941
0.603168
0.599999
0.599426
0.598736
0.597072
0.596841
0.594496
0.594362
0.58909
0.58909
0.58909
0.584151
0.583783
0.583783
0.581235
0.580839
0.57841
0.576819
0.575999
0.573452
0.573334
0.571035
0.566024
0.563479
0.557419
0.557053
0.547201
0.541288
0.539998
0.539998
0.537795
0.534109
0.53143
0.530299
0.528001
0.525405
0.525405
0.524858
0.52457
0.523636
0.522702
0.52188
0.521377
0.521377
0.514285
0.514285
0.512804
0.511143
0.510546
0.509269
0.500867
0.499834
0.494118
0.493714
0.49323
0.492631
0.492151
0.489598
0.4725
0.4725
0.471722
0.471722
0.469566
0.469566
0.454738
0.452093
0.448301
0.446897
0.445191
0.439998
0.43875
0.43875
0.43563
0.431998
0.431998
0.431998
0.424918
0.423242
0.41868
0.418066
0.414945
0.412585
0.412585
0.412585
0.412104
0.405001
0.388801
0.386668
0.383226
0.378394
0.375652
0.372413
0.370286
0.363185
0.320001
0.319092
0.275744
0.267216
0.254116
0.229091
0.883634
0.751303
0.719997
0.697498
0.659998
0.65739
0.633912
0.627096
0.626565
0.623504
0.617142
0.617142
0.607498
0.603724
0.60279
0.601965
0.598992
0.596841
0.593588
0.58909
0.58909
0.581538
0.580297
0.579129
0.575999
0.572306
0.57112
0.568422
0.566556
0.563479
0.563032
0.5625
0.56219
0.561599
0.561039
0.561039
0.560609
0.560001
0.558879
0.557105
0.550187
0.550063
0.54857
0.54806
0.546206
0.545244
0.539998
0.539998
0.539998
0.53695
0.535386
0.535046
0.534954
0.534545
0.530183
0.529811
0.527441
0.52683
0.523125
0.523125
0.521377
0.520292
0.519495
0.518398
0.517501
0.514285
0.511577
0.510809
0.510546
0.506249
0.505756
0.504933
0.504432
0.502325
0.501427
0.49846
0.495737
0.4934
0.49323
0.492
0.49091
0.490212
0.486
0.485394
0.485216
0.479999
0.479999
0.479999
0.479999
0.47848
0.47593
0.469566
0.462858
0.462858
0.46
0.458759
0.458629
0.450783
0.45
0.45
0.448832
0.448616
0.443077
0.440815
0.439998
0.436364
0.431998
0.431998
0.431998
0.427499
0.418066
0.411428
0.409264
0.405001
0.405001
0.401143
0.400823
0.4
0.396001
0.389069
0.385715
0.384
0.379781
0.376743
0.375652
0.370286
0.370286
0.370286
0.369475
0.368183
0.366791
0.366791
0.365538
0.359999
0.359999
0.357791
0.346416
0.337501
0.332309
0.324001
0.308571
0.308571
0.308571
0.303157
0.290151
0.281739
0.273802
0.273802
0.245455
0.221538
0.196362
0.176085
0.166154
0.144001
0.0568407

## Sheet: Catastrophe
Catastrophe per minute
Control	BUB-1	HCP-1	BUB-1+HCP-1	CLS-2	CLS-2R970A	BUB-1+CLS-2	HCP-1+CLS-2	BUB-1+HCP-1+CLS-2	BUB-1+HCP-1+CLS-2R970A		Descriptive statistics	Control	BUB-1	HCP-1	BUB-1+HCP-1	CLS-2	CLS-2R970A	BUB-1+CLS-2	HCP-1+CLS-2	BUB-1+HCP-1+CLS-2	BUB-1+HCP-1+CLS-2R970A		ANOVA summary										ANOVA summary
0.079365	0.196079	0.54054	0.135135	0	0.0511509	0.084388	0.106383	0.259739	0.202019		Number of values	1192	763	935	732	885	497	556	446	478	290		F	97.13									F	2.696
0.135593	0.370371	0.138889	0.317461	0	0	0.571422	0	0.454547	0.153846														P value	<0,0001									P value	0.0195
0.465117	0	1.33333	0	0	0.108992	0.250001	0	0.246912	0.434787		Minimum	0	0	0	0	0	0	0	0	0	0		P value summary	****									P value summary	*
0.30303	0.408164	0.740746	0.16	0	0.106101	0.136986	0.10989	0.147059	0		25% Percentile	0.12	0.14	0.1	0.17	0	0.052	0.053	0	0.052	0.053		Significant diff. among means (P < 0.05)?	Yes									Significant diff. among means (P < 0.05)?	Yes
0.152671	0.196079	0.499999	0.289855	0.0634921	0.0809715	0	0.363634	0.266666	0.162602		Median	0.21	0.26	0.2	0.29	0.097	0.08	0.1	0.06	0.085	0.1		R squared	0.1144									R squared	0.004266
0.465119	0	0.833328	0.136054	0.162162	0.0547946	0.25641	0.13289	0.0934579	0.454549		75% Percentile	0.4	0.49	0.4	0.5	0.2	0.17	0.21	0.15	0.16	0.16
0.5	0.909079	1.33331	0.869558	0.0530504	0.117302	0.15873	0.109589	0.235295	0.26316		Maximum	2	2.5	2.2	2	1.4	1.3	1.1	1.2	1.9	1.3		Brown-Forsythe test										Brown-Forsythe test
0.408163	0	0.223465	0.238095	0	0.159574	0.714295	0.145986	0.175439	0.0881059		Range	2	2.5	2.2	2	1.4	1.3	1.1	1.2	1.9	1.3		F (DFn, DFd)	39,38 (9, 6764)									F (DFn, DFd)	2,568 (5, 3146)
0.106383	0.122699	0.30303	0.327871	0.0738009	0.15873	0.173913	0	0.0537633	0														P value	<0,0001									P value	0.0251
0.0980392	0	0.303031	0.740741	0	0.0520832	0	0.12012	0.425536	0.117302		10% Percentile	0	0	0	0.096	0	0	0	0	0	0		P value summary	****									P value summary	*
0.115607	0	0.26316	1.33331	0	0.0638978	0.16529	0.108401	0.21978	0.148148		90% Percentile	0.67	0.8	0.67	0.8	0.4	0.36	0.43	0.36	0.35	0.38		Are SDs significantly different (P < 0.05)?	Yes									Are SDs significantly different (P < 0.05)?	Yes
0.128206	0.176992	0.192307	0.185185	0.0598802	0.0699301	0.15625	0.0543478	0.104167	0
0.169491	0.363635	0	1.53851	0.384616	0.0709219	0	0.116279	0.0527705	0.111111		95% CI of median												Bartlett's test										Bartlett's test
0.147059	0	0.183485	0.400002	0.27778	0	0.434779	0.174419	0.425533	0.198019		Actual confidence level	95%	96%	95%	96%	96%	95%	95%	96%	95%	96%		Bartlett's statistic (corrected)	787.9									Bartlett's statistic (corrected)	18.57
0.425531	0.270269	0.222222	1.05266	0.15873	0	0.152672	0.113636	0.105263	0.0641026		Lower confidence limit	0.2	0.24	0.19	0.26	0.085	0.07	0.088	0.056	0.072	0.078		P value	<0,0001									P value	0.0023
0.476193	0.253164	0	0.240964	0.55556	0	0.206185	0	0.181818	0.136054		Upper confidence limit	0.22	0.29	0.22	0.32	0.1	0.1	0.12	0.082	0.099	0.1		P value summary	****									P value summary	**
0.526313	0.606062	0.176991	1.42855	0.10989	0.0636942	0.183486	0.0694443	0.246912	0.186047														Are SDs significantly different (P < 0.05)?	Yes									Are SDs significantly different (P < 0.05)?	Yes
0.666663	0.800012	0.294119	0.999988	0.0552486	0	0	0	0	0		Mean	0.3	0.36	0.3	0.39	0.16	0.14	0.17	0.13	0.14	0.15
0.465122	0.100502	0.190475	0.187794	0	0.0550964	0.117647	0.0546449	0.144928	0.103092		Std. Deviation	0.29	0.34	0.31	0.32	0.21	0.19	0.2	0.18	0.18	0.2		ANOVA table	SS	DF	MS	F (DFn, DFd)	P value					ANOVA table	SS	DF	MS	F (DFn, DFd)	P value
0.183486	0.666678	0	0.449437	0	0.0760456	0	0	0.141844	0.1		Std. Error of Mean	0.0084	0.012	0.01	0.012	0.0069	0.0083	0.0084	0.0086	0.0082	0.012		Treatment (between columns)	61.3	9	6.811	F (9, 6764) = 97,13	P<0,0001					Treatment (between columns)	0.5039	5	0.1008	F (5, 3146) = 2,696	P=0,0195
0.238096	0.454547	0.30075	1.02563	0	0.0724637	0.172413	0	0.238095	0.0826446														Residual (within columns)	474.3	6764	0.07012							Residual (within columns)	117.6	3146	0.03739
0.16529	0.198019	0.136519	0.193236	0.217392	0.108992	0.212766	0.434779	0.36364	0.769227		Lower 95% CI of mean	0.29	0.34	0.28	0.36	0.14	0.13	0.15	0.11	0.12	0.13		Total	535.6	6773								Total	118.1	3151
0.253166	0.20202	0	0.37037	0.350877	0.053476	0.169491	0	0	0.289855		Upper 95% CI of mean	0.32	0.39	0.32	0.41	0.17	0.16	0.18	0.15	0.15	0.17
0.238095	0	0.930222	0.138889	0.533331	0.0550963	0.143885	0.103896	0.208333	0.150376														Data summary										Data summary
0.256411	0.526313	0.232557	0.400003	0.15625	0.606062	0.196079	0	0.363635	0		Coefficient of variation	96%	94%	105%	83%	131%	129%	118%	139%	131%	131%		Number of treatments (columns)	10									Number of treatments (columns)	6
0.185185	0.869556	0	0.285715	0.0595239	0.52632	0	0.0533333	0.140845	0.22792														Number of values (total)	6774									Number of values (total)	3152
0.0970871	0.370371	0.242424	0.465111	0	0.18018	0.169492	0	0.102564	0.104987		Sum	362	277	281	282	139	71	93	58	65	44
0.206186	0	0.563388	0	0.333332	0	0.15873	0.0536193	0.12987	0.190477														Number of families	1									Number of families	1
0.95238	0.506322	0	0.157481	0.0956937	0.0537634	0.084746	0.0539083	0.107527	0.0799998														Number of comparisons per family	9									Number of comparisons per family	5
0.57142	0.975611	0.38462	0.222222	0.0520834	0.377361	0.194175	0	0.165289	0.091743														Alpha	0.01									Alpha	0.01
0.34483	0.39604	0.547942	0.434779	0.289856	0	0.118343	0.0536192	0.121951	0
0.217392	0	0.833333	0.465112	0.36697	0	0.454547	0	0.135135	0.0884955														Dunnett's multiple comparisons test	Mean Diff,	99,00% CI of diff,	Significant?	Summary	Adjusted P Value	A-?				Dunnett's multiple comparisons test	Mean Diff,	99,00% CI of diff,	Significant?	Summary	Adjusted P Value	E-?
0.238095	0.242423	0.168067	0.322582	0	0.0543478	0	0	0	0.434782														Control vs. BUB-1	-0.05901	-0,09888 to -0,01914	Yes	****	<0,0001	B	BUB-1			CLS-2 vs. CLS-2R970A	0.01327	-0,02013 to 0,04668	No	ns	0.6672	F	CLS-2R970A
0.0840333	0.360362	0.131579	0.689643	0	0	0.487802	0.161725	0.10582	0.225988														Control vs. HCP-1	0.003275	-0,03429 to 0,04084	No	ns	0.9997	C	HCP-1			CLS-2 vs. BUB-1+CLS-2	-0.01083	-0,04309 to 0,02142	No	ns	0.7961	G	BUB-1+CLS-2
0.434784	0.134228	0.178571	0.216606	0	0	0.138889	0.0518134	0	0.108696														Control vs. BUB-1+HCP-1	-0.08202	-0,1224 to -0,04164	Yes	****	<0,0001	D	BUB-1+HCP-1			CLS-2 vs. HCP-1+CLS-2	0.02701	-0,007596 to 0,06162	No	ns	0.0727	H	HCP-1+CLS-2
0.134228	0	0.19802	0.416671	0.333333	0	0.3125	0.162602	0.165289	0.754711														Control vs. CLS-2	0.1465	0,1083 to 0,1847	Yes	****	<0,0001	E	CLS-2			CLS-2 vs. BUB-1+HCP-1+CLS-2	0.02051	-0,01332 to 0,05434	No	ns	0.247	I	BUB-1+HCP-1+CLS-2
0.454548	0.168066	0.248446	0.277777	0.0666667	0.0530504	0.624994	0.0524936	0.173913	0														Control vs. CLS-2R970A	0.1598	0,1139 to 0,2057	Yes	****	<0,0001	F	CLS-2R970A			CLS-2 vs. BUB-1+HCP-1+CLS-2R970A	0.006851	-0,03348 to 0,04718	No	ns	0.9858	J	BUB-1+HCP-1+CLS-2R970A
0.0727274	0.909071	0.102828	0.199999	0.0607903	0.222224	0.103627	0	0.298508	0.0645162														Control vs. BUB-1+CLS-2	0.1357	0,09150 to 0,1798	Yes	****	<0,0001	G	BUB-1+CLS-2
0.116959	0.222222	0.327867	0	0.0569801	0.212766	0	0.10582	0.175438	0.975604														Control vs. HCP-1+CLS-2	0.1735	0,1258 to 0,2212	Yes	****	<0,0001	H	HCP-1+CLS-2			Test details	Mean 1	Mean 2	Mean Diff,	SE of diff,	n1	n2	q	DF
0.186916	0.327869	0.645161	0.204083	0.104439	0	0.179104	0.10989	0	0.285715														Control vs. BUB-1+HCP-1+CLS-2	0.167	0,1205 to 0,2136	Yes	****	<0,0001	I	BUB-1+HCP-1+CLS-2			CLS-2 vs. CLS-2R970A	0.1571	0.1438	0.01327	0.01084	885	497	1.225	3146
0.222222	0.21978	0.198021	0.0743494	0.103493	0.0626959	0.0947867	0.222222	0.194175	0														Control vs. BUB-1+HCP-1+CLS-2R970A	0.1534	0,09705 to 0,2097	Yes	****	<0,0001	J	BUB-1+HCP-1+CLS-2R970A			CLS-2 vs. BUB-1+CLS-2	0.1571	0.1679	-0.01083	0.01046	885	556	1.035	3146
0.285715	0.27778	0.3252	0.645161	0.209424	0.105263	0	0.221606	0	0																								CLS-2 vs. HCP-1+CLS-2	0.1571	0.1301	0.02701	0.01123	885	446	2.406	3146
0.087336	0.512815	0.216217	0.425529	0.135594	0.106383	0.645159	0.10582	0.235295	0														Test details	Mean 1	Mean 2	Mean Diff,	SE of diff,	n1	n2	q	DF		CLS-2 vs. BUB-1+HCP-1+CLS-2	0.1571	0.1366	0.02051	0.01098	885	478	1.868	3146
0.312501	0.769227	0	0.196077	0	0.112676	0.714292	0.0520833	0.416664	0.124611														Control vs. BUB-1	0.3036	0.3626	-0.05901	0.01228	1192	763	4.807	6764		CLS-2 vs. BUB-1+HCP-1+CLS-2R970A	0.1571	0.1503	0.006851	0.01308	885	290	0.5236	3146
0.212765	0	0.388346	0.232557	0.053476	0.0514138	0.103627	0.0529101	0	0.10101														Control vs. HCP-1	0.3036	0.3003	0.003275	0.01157	1192	935	0.2831	6764
0	0.0961536	1.66667	0.909079	0	0	0	0.882352	0.111732	0.151514														Control vs. BUB-1+HCP-1	0.3036	0.3856	-0.08202	0.01243	1192	732	6.596	6764
0.740746	0.476191	0.173913	0.666673	0.0552486	0.169972	0.999988	0	0.210527	0.0869565														Control vs. CLS-2	0.3036	0.1571	0.1465	0.01175	1192	885	12.47	6764
0.135135	0.909091	0.430105	0.350878	0.0524934	0.0527704	0.317461	0.0571429	0.103896	0.0714286														Control vs. CLS-2R970A	0.3036	0.1438	0.1598	0.01414	1192	497	11.3	6764
0.2	0.199336	0	0.2	0.106667	0.500004	0.35714	0.057971	0.444447	0.229885														Control vs. BUB-1+CLS-2	0.3036	0.1679	0.1357	0.0136	1192	556	9.976	6764
0.109891	1.24996	0.0995025	0	0.0555556	0.18868	0	0	0.104712	0.392155														Control vs. HCP-1+CLS-2	0.3036	0.1301	0.1735	0.0147	1192	446	11.8	6764
0	0.119047	0	0.256412	0.0536194	0.350878	0.110803	0.0529101	1.11112	0														Control vs. BUB-1+HCP-1+CLS-2	0.3036	0.1366	0.167	0.01434	1192	478	11.65	6764
0.246914	0.27027	0.202021	0.253166	0	0	0.512824	0.169492	0	0.0735294														Control vs. BUB-1+HCP-1+CLS-2R970A	0.3036	0.1503	0.1534	0.01734	1192	290	8.845	6764
0.16	0.144927	0.266669	0.526316	0.063492	0.112045	0.246915	0.104167	0.0526315	0.181818
0.136055	0.800012	0.22472	0.19802	0.0527704	0.0787401	0.120482	0.0581395	0.263157	0.0696864
0.186917	0.512824	1.90482	0.975593	0.0543479	0.110193	0.0985219	0	0.0925926	0.129032
0.191387	0.499999	1.37934	0.207253	0.150376	0	0.224719	0.104987	0	0
0.208332	0.123457	0.0625	0.800006	0.192308	0.106101	0.085837	0.104712	0.102302	0.170939
0.148148	0.228572	0.117302	0.128205	0	0.106952	0	0.103627	0.0819673	0
0.294118	0.40816	0.270272	0.12945	0	0.107239	0.162602	0.118694	0.399997	0.0514139
0.103627	0.172414	0	1.21209	0	0.357142	0	0.0569801	0	0.108108
0.259741	0	0.655729	0.194174	0.087336	0	0.12987	0.102828	0.179373	0.136519
0.909071	0.399999	0.392155	0.126582	0.0625	0	0	0.0531915	0.272107	0.0520833
0.384617	0.35088	0.141343	0.26316	0.140845	0.121951	0.35714	0	0.0877193	0.158729
0.256411	0.132013	0	0.384616	0	0.344828	0.0701753	0	0	0.243901
0.119048	0.121951	0.363638	0.104167	0.0536193	0	0.186917	0	0.121951	0.294119
0	0.217391	0.203046	0.141844	0.386473	0.107817	0.162601	0	0	0
0	0.23256	0.330577	0.400002	0.102564	0.103359	0.176991	0	0.101523	0.166667
0.909082	0.0952381	0.153257	0.476194	0.171429	0.15748	0.143884	0.106952	0.487807	0.0522193
0.104712	0.845079	0.0995024	1.17649	0	0.107527	0.172414	0.138408	0	0.0775194
0.113636	0.348836	0.597011	0.277779	0	0	0.52631	0.344826	0.0604229	0.0569801
0.240965	1.36367	0.0943394	0	0.213904	0.377355	0.054945	0.0641026	0.0524935	0.0843883
0.714277	0.149254	0	0.175439	0	0	0.0757577	0.0623053	0.15748	0.217391
0.999985	0.392154	0.555559	0	0.0527705	0	0.0704226	0.0550963	0.153846	0.0558659
0.0925926	0.444447	0.0917434	0.215054	0	0.0729927	0.714292	0	0.232557	0.15873
0.285716	0.930233	0.283689	0.263158	0.17094	0.133333	0.298508	0.10929	0.0539083	0
0.138889	1.29031	0.909075	0.634929	0.0952383	0	0.298507	0	0.102302	0
0.102564	0.112676	0.238096	0.296295	0.0593473	0	0	0.0529101	0.0591717	0.116279
0.190476	0.366973	0.0779724	0.119761	0.0595238	0	0.0716847	0.0561798	0.054945	0.833327
0.162601	1.11112	0	0.52632	0.118343	0.0531915	0.800003	0.107527	0.051282	0.152672
0.188678	0.333331	0.333335	0.170941	0.0555554	0.057971	0.425536	0.107817	0.400003	0.0772201
0.186916	0.606068	0.253164	0	0	0.0547945	0.0625	0.169492	0.0632912	0.0628931
0.526314	0.425532	0.163935	0.555559	0.258063	0.0536193	0.869574	0.106101	0.134228	0.0607903
0.185185	0	0.555555	1.81824	0.155039	0.322579	0.057971	0	0.0934581	0.95239
0.666669	0.975604	0.101266	0.444443	0	0.150944	0.333333	0	0.110803	0.156251
0.133333	0.150943	0.0966182	0.347826	0.338986	0.101781	0.235294	0.0516797	0.102564	0.533334
0.392159	0.179373	0	0.784302	0	0.113636	0.188679	0.400003	0.0653595	0
0.243904	0.184332	0	1.14285	0	0	0.143885	0.0657895	0.289857	0.159362
0.571431	0.0584795	0.150376	0.0923786	0.103627	0.833343	0.130719	0	0.0662253	0
1.66671	0.333332	0.399998	0.134228	0.451976	0.588241	0.0826447	0.0589969	0	0.0706713
0.55556	0.714293	0.125787	0.212766	0.689651	0	0	0.4878	0	0
0.769227	0.500004	0.153846	0.64517	0.0975612	0.277779	0.141844	0	0.392155	0.285715
0.126582	0.588241	0.388349	0.199999	0.144404	0.246913	0.140845	0.0552485	0.277779	0.130719
0.194175	1.53852	0.112676	0.102828	0.0947867	0.202019	0.0952383	0.107527	0	0.106952
0.101523	0.195121	0.147058	0.075188	0.114942	0.303031	0.162601	0	0	0.370369
0.0847458	1.0811	0	0.499994	0.312498	0.273973	0.344827	0	0	0.0632911
0.119048	0.714292	0.0970871	0.13245	0.137931	0.180181	0.07722	0.0543478	0.104439	0.0508906
0.322581	0.347825	0.512824	0.344825	0	0.113314	0.160001	0.202703	0.175439	0.0694443
0.0680271	0.2454	0.18868	0	0	0.107817	0.11236	0	0.148148	0.194175
0.227273	0.120482	0.465119	1.24996	0.149626	0.0558658	0.833325	0.0547945	0	0.0851065
0.140845	0.625006	0.232557	0.588238	0.100251	0.0536193	0.11236	0.0595237	0	0.512824
0.166667	0	0.111732	0.133333	0.0524934	0.0574713	0	0.104439	0.07326	0.17291
0.277777	0.588244	0.155039	0.289856	0	0	0.0938968	0.0546448	0	0.106666
0.145986	0.0716845	0.238096	0.645153	0	0.173913	0.425529	0.112676	0.0694445	0.28169
0.147059	2.22232	0	1.05266	0	0.0904976	0	0.0536193	0	0.0892858
0	0.194174	0.416668	0.37037	0	0.0516795	0.0653594	0.0531915	0.0526315	0.148149
0.833332	0	1.00002	0.333334	0	0.104439	0.185186	0.103093	0	0.83334
0.163935	1.53843	0.101523	0.333335	0.289856	0	0.243903	0.103093	0.333334	0
0.0641025	0.16129	1.24997	0.350878	0	0.0746267	0.206185	0.164835	0	0
0.185185	0.250001	0	0	0.425535	0.0530504	0	0	0.0833334	0.052356
0.540534	0.58823	0.139373	0.666662	0.0749064	0.0632911	0.176992	0	0.0546448	0.204081
0.740749	0.28169	0	0.476196	0	0	0.263157	0.0518135	0.0632912	0
0	0.16	0.32258	0.322582	0	0.105541	0.196079	0.054054	0.0719425	0
0.666664	0.235293	0.0714286	0.253166	0	0.0542006	0.16529	0.0555555	0.540545	0.169491
0.322582	0.210527	0.645151	0.0856531	1.11113	0.0557103	0.136054	0.110497	0.263158	0.15748
0.55556	0.769227	0.19802	0.186916	0.111576	0.0560225	0.111732	0	0.384614	0.124224
0	0.37037	0.769234	0.224719	0.0566573	0.0531915	0.43478	0.307693	0	0.0995025
0	0.150376	0.408161	0.289854	0	0.0651466	0.0754718	0	0.408161	0.0564972
0.333332	0	0.547947	0.333332	0.0552486	0	0	0.0539084	0.222222	0.0881058
0.434779	0	0.204081	0.363635	0.0530504	0	0.0775194	0.144404	0	0
0	0.606052	0.199005	0.363638	0	0.0547944	0.0598803	0.157068	0.103359	0.0576368
0	0.526313	0.300753	0.888894	0	0.0529101	0.266666	0.263159	0.107817	0.0515464
0.377356	0.322579	0.11976	0.170213	0.053476	0.0560224	0.212766	0	0.163934	0.114943
0.210526	0.178572	0.833332	0.151515	0.136054	0.0555556	0	0	0.0847457	0.0522193
0	0	0	0.526314	0	0	0.0900901	0.220995	0	0.0527705
0.176991	0.238094	1.99999	0.322582	0	0	0	0.0531915	0.0634921	0.107238
0.23256	0.769216	0.199004	0.208333	0.054054	0.105541	0.16129	0.107817	0.0597015	0.162602
0.363638	0.238096	0.163934	0.799984	0	0.18868	0.168068	0.425535	0.625008	0.0554017
0	0.144928	0.264903	0	0.057637	0	0	0	0	0.162602
0.416668	1.11113	0.322582	0	0.0529101	0.183486	0.135135	0.0564972	0.0576369	0
0.202021	0.0809717	0.816322	0.540534	0	0	0.31746	0	0.060241	0.0522194
0.434787	0.294118	0.799994	2.00001	0	0.0546447	0.0701754	0	0.19802	0.0760456
0.273973	0.714293	0.16	0.384614	0.0662252	0.0529101	0	0.833334	0	0.0511509
0.215054	0.3125	0	0.212765	0.0529101	0	0.0655738	0	0.0546449	0
0.135135	1.24996	0.149813	0	0	0	0	0.338983	0.263157	0.0537634
0.232557	0.10929	0.454547	0.298509	0.111421	0	0.0892859	0.186915	0.0740742	0.0523561
0.136054	0.175438	1.05262	1.53843	0.102564	0.350877	0.210527	0	0.125	0.109589
0	0.204083	0.0869566	0.357145	0.128205	0.106952	0.0724639	0.0869566	0	0.0540542
0.108696	0.235295	0.588238	1.66661	0	0	0.625006	1.24996	0.416665	0.416664
0.769241	0.799999	0	1.25	0	0.0543478	0.68966	0	0	0.125
0.416668	0.769227	0.0539084	0.769244	0	0.051948	0.145985	0	0.246913	0
0.408161	0.555559	0.399999	0.689644	0	0.0543478	0	0.57143	0	0.357143
0.149253	0.0917432	0.149253	0.476191	0	0.0539083	0.194176	0.303032	0.0522192	0.111111
0.125	0.112994	0.41667	0.416668	0	0.0527704	0.344828	0.0934579	0.0884955	0
0.123457	0.144927	0	0.500004	0.164835	0	0.16	0.144928	0.185185	0
0.158731	0.338981	0.465119	0.799999	0	0	0.105263	0.526313	0.0757577	0.12987
0	0.454549	0.1	1	0.114286	0.526313	0	0.526313	0.0706713	0
0.156251	0.285715	0.224718	0.238095	0.370372	0.0634921	0.148149	0	0	0.0549452
0.126582	0.19802	0.833326	0.333335	0.0597014	0.105541	0.175439	0.444443	0.0651467	0
0.148149	0	0	0.210527	0	0.106952	0	0	0.0516796	0.285713
0.131579	0.176211	0.100503	0	0	0.05698	0.144928	0.165289	0.163934	0.126582
0.408165	0.208334	0	0.338984	0.112994	0.055866	0	0.909071	0.0847459	0.512815
0.134228	0.666678	0.399999	0.126183	0.634919	0.114286	0.107527	0	0.0843881	0.338983
0.909091	0.16129	0.4	0	0.0904976	0	0.465114	0.0896861	0.0524935	0
1.66671	1.1111	0.208333	0.169492	0	0.0524935	0.285715	0	0.0613496	0.102564
0.740732	1.11113	0.225989	0.198019	0	0	0.5	0.0699301	0.0757576	0.052356
0.103093	0	0.506328	0	0.0530504	0	0.285713	0	0.051282	0.999976
0.199004	0.246913	0.140845	0.909078	0	0.58823	0	0.116279	0	0
0.131579	0.229885	0.714277	0.408164	0	0.153846	0.0847458	0	0.19802	0.307691
0.108108	0	0.425529	1	0.108696	0.102564	0.869574	0.106952	0.101523	0
0.465112	0.799996	0.121951	1.24996	0.370372	0.05291	0.206185	0.130719	0.0934579	0.0688469
0.47619	0.4	0.769235	0.277777	0.540545	0	0	0.270269	0.103896	0.714292
0.123457	0.95239	0.279719	0.606061	0	0.606055	0.571426	0.129032	0	0.263156
0.327869	0	0.930234	0.333333	0.930244	0.232557	0.173913	0	0.624993	0.0739371
0.606062	0.289856	0.245398	0.95239	0	0	0.0980392	0.103093	0.083682	1.33336
0.769227	0.555549	0.519485	0.434782	0.10989	0.083682	0.206186	0	0.144928	0.107527
0.196078	0.588244	0	0.606062	1.29031	0	0.373831	0.277777	0.0892859	0.108108
0.54054	0.392154	0.204083	0.0847456	0.109289	0.4878	0.307691	0	0.130719	0.101523
0.444448	0.108696	0.370372	0.0943396	0.476186	0.425532	0.357145	0.327869	0.095694	0.104439
0.606065	0	0.145985	0.487808	0.273975	0.0904977	0.113636	0.27027	0.122699	0.0526316
0.370368	0.689652	0.0881061	0.140845	0	0.15873	0.148148	0.350877	0.102041	0.10582
0.217393	0.645153	0.185184	0	1.17649	0.13245	0	0.0790514	0.465119	0.103896
0.129033	0.126582	0.701751	0.10989	0.270269	0.0706714	0.0584796	0.45455	0.167364	0.106667
0.0970872	0.129032	0.563385	0.175439	0.370372	0.36364	0.138888	0	0.10582	0.0531916
0.363636	0.155039	0.289857	0.259739	0	0.0526316	0	0.0858371	0.105541	0.100503
0.114286	0	0	0.714292	0.0813007	0.114286	0.0877192	0.645158	0.153453	0.107817
0.215053	0.125786	0.169492	0.178572	0.341882	0.465116	0	0	0	0.104712
0.0854699	0.392155	1.0811	0.253165	0.165976	0.243902	0.0526316	0.114285	0.263158	0.103627
0.36364	0.266667	0.571422	0	0.52632	0.136055	0.0877192	0.333332	0.131148	0.303031
0.344826	0.095012	0.317461	0.307694	0.363634	0.0884958	0	0.0573067	0.0519481	0.0660066
0	0.588244	0	0.129032	0.26316	0	0.0809715	0.222224	0	0.101523
0.235294	0.159362	0.238096	0.303031	0.161291	0.18018	0	0	0.080645	0.103896
0.425531	0.606052	0.125787	1.33335	0.152672	0.645158	0.15873	0.344828	0.317461	0.104439
0	0.0966185	0.238096	0.096154	0.312498	0.769216	0.317459	0.104712	0	0.102828
0.21978	0.266669	0.0749064	0.131579	0.740741	0.243903	0	0	0.0595237	0.0542006
0.243902	0.476194	0	0.240964	0	0.104167	0.138889	0.121212	0	0.10582
0.0668897	0.540545	0.714283	0.555548	0.281689	0.624993	0.130719	0	0.109589	0.104712
0.13986	0.833332	0.454543	0.281692	0.18868	0.0643086	0.0600602	0.16	0.184615	0.0537635
0.5	0.526314	0.140845	0.270271	0	0.128205	0.0588237	0.210526	0.0519481	0.112676
0.624994	0.606065	0.285713	0.206186	0.176991	0.487808	0.689661	0.0826448	0.0534759	0.571426
0.15748	0.350876	0.20202	0.31746	0	0.540545	0.0597015	0	0.217391	0.216216
0.121951	0	0.384618	0	0.0566572	0.140845	0.069204	0.350875	0.0684931	0.266666
0.143885	0.190476	0.689649	0.540534	0.240965	0	0	0.0636943	0	0.0826448
0.186916	0.487802	0.15625	0.156249	0.1227	0.465122	0.090909	0	0	0.0518134
0.133333	0.206185	0.137931	0.454549	0.303031	0.116959	0	0.0784312	0.15625	0.0554017
0.212767	0.227272	0.266667	0.227273	0	0	0.123457	0	0.102564	0.052356
0.0896861	0.338985	0.15625	0.512821	0.0524935	0	0.363638	0	0.833334	0.0539084
0.11976	0.540539	0.222223	0.289856	0.465114	0.120482	0.232558	0.173912	0.606052	0.104987
0	0.461542	0.408161	0.32258	0.124611	0.217392	0	0.162601	0.0796813	0.0514138
0.111111	0.126315	0.104167	0.136054	0.10582	0	0.163935	0.0555556	0.0543478	0
0.186916	0.25974	0	0.114942	0.425531	0.0527704	0.111732	0.55556	0.13245	0.102828
0.227272	0.416667	0.0716848	0.869574	0.0970874	0.512824	0.540534	0	0.0892858	0.0540541
0.148148	0.353981	0.204082	0.434779	0.051151	0.363635	0	0.0512821	0.0760455	0.512823
0.333332	0.166667	0.15748	0.25974	0.0523559	0.0754717	0	0.131579	0	0.0611621
0.263157	0.119761	0.142856	0	0.0550964	0.216802	0	0.425532	0.153846	0.0529101
0.169491	0.218579	0.416669	0.344828	0.465117	0.121212	0.10989	0	0.0858368	0
0.32258	0.215055	0.14337	0.281693	0.281693	0	0	0.095238	0.143884	0.0544959
0.512815	0.277777	0.105263	0.444449	0.111111	0.149254	0.125	0.625006	0	0.0561798
0.281691	0.151514	0.196078	0.689659	0.285714	0.344829	0.625001	0	0.0519481	0.0549451
0	0.350877	0.434784	0.204082	0.357145	0.294119	0.232559	0.175438	0.106101	0.05
0.190476	0.526319	0.125786	0.144928	0.120846	0	0	0.645161	0.051282	0.05291
0.312502	0.526313	0.384615	0	0.122699	0.0533333	0.168067	0.465117	0.338982	0.714295
0	0.370372	0.140845	0.266665	0	0.109289	0.454547	0	0.0854701	0.338983
0.127389	0.263158	0.130293	0.425535	0.141844	0.714293	0.208333	0.625006	0	0.0754717
0.129032	0.224719	0.350878	0.416668	0.357145	0.0711744	0	0.0564972	0.0554017	0.0869565
0.108108	0.31746	0.132013	0.238095	0.289856	0.13245	0.0655737	0.689652	0.121212	0.1875
0.377361	0.227273	0.689651	0.285715	0	0	0.0547945	0.555559	0.0591717	0
0.444447	0	0.0743493	0.465111	0.227273	0.0938965	0.266668	0.229884	0.555554	0.0809717
0.210527	0.238095	0.571429	0.204082	0	0.129032	0.219781	0.384615	0.115942	0.0555555
0.219781	0.253166	0.384618	0.113636	0.176991	0.103896	0.18018	0	0.0503778	0.0527704
0.645158	0.333335	0.0873363	0.192308	0	0.869558	0.125	0.625008	0.289855	0.102041
0.212766	0.163934	0.130719	0	0.117647	0.571422	0.178571	0.294118	0.123077	0
0.113636	0.198021	0	0.338983	0.104712	0.103093	0.0578035	0	0.344827	0.0630915
0.227274	0.476195	0.615386	0.178571	0.186916	0	0.1	0.102564	0.119048	0.0539084
0.155039	0.266666	0.209424	0.740732	0.310076	0.0823044	0	0.0595239	0.0524935	0.104712
0.666662	0.227273	0.232559	0.333333	0	0.0809718	0.999988	0.714295	0.434782	0.106101
0.799984	0.273974	0.180181	0.093458	0.0518135	0.0555556	0.588244	0.202021	0.0632912	0.106101
0.185184	0.392156	0.229884	0.400002	0.150376	0.0527705	0.142858	0	0.051948	0.101781
0.141844	0.121212	1.05263	0	0	0.105263	0.333333	0.0531915	0.13986	0.0561798
0	0.869574	0.0740741	0.235295	0.104167	0.106666	0.127389	0.0778211	0.0985221	0.512818
0.169492	0.499999	0.714283	0.357142	0	0.512815	0.168067	0	0	0.115607
0	0.115607	0.714287	0.20202	0.588238	0.238095	0	0.0564972	0.240965	0.104712
0.113636	0.666659	0.10989	0.188679	0	0	0.128205	0.0555556	0.0677966	0.106952
0.21978	0.689651	0	0.181818	0.126582	0.0527704	0.20202	0.0711743	0.0647249	0.0566572
0.169492	0.173912	0.148149	0	0.136987	0.909079	0.168067	0.215053	0.196078	0.158311
0.222222	0.645153	0	0.199999	0.222223	0.208332	0.148148	0.151515	0.172414	0.104439
0.0694444	0.52632	1.17649	0.416669	0.133334	0.273973	0.215054	0	0.148148	0.21164
0.116279	0.208333	1.21211	0.64517	0.104167	0	0	0.149254	0.666659	0.18018
0.169492	0.555548	0.110193	0.20202	0.204081	0.0527704	0.229885	0	0.0558659	0
0.1	0.192308	0.182649	0.204081	0.277778	0.0966186	0.0956937	0.112359	0.134228	0.104439
0.273971	0	0	0.645162	0	0.333333	0.0847458	0	0.124223	0.157895
0.138889	0.172413	0.0904979	0.15625	0.111111	0.571426	0.384619	0.35714	0	0.588244
0.18018	0.198021	0.224719	0.624996	0.256411	0.0540541	0.145986	0	0.0530504	0.408163
0	0	0.166666	0.500006	0.571434	0.125787	0.370369	0.588241	0.0651465	0.07722
0.624992	0.140846	0.588238	0.106952	0.143369	0	0	0	0	0.0526315
0.116959	0	0.169492	0.0675675	0	0.0680271	0	0.0803212	0.0537635	0.15748
0.273974	0.384616	0.434783	0.624994	0.101523	0.0719424	0.142857	0.526316	0.138889	0.0519481
0.20202	0.571423	0.263157	0.222222	0	0.317459	0.13986	0.0666667	0.555548	0.0543479
0.384614	0.31746	0.126582	0.270269	0	0.137931	0.0985223	0	0	0.0533334
0.0819672	0.263158	0.186915	1.05263	0.0510204	0.253164	0	0.0584795	0.0516795	0.0539083
0.185185	0.289854	0.182648	1.33334	0.151515	0.281691	0.0938968	0.0819673	0	0
0.0896859	0.392155	0.190477	1.42853	0	0.227273	0.217392	0	0	0.0943394
0.102564	0.110497	0	1.1111	0.222223	0.0781249	0.173912	0	0	0
0.183486	0.173913	0.131148	0.130719	0.147059	0.0546447	0.25	0	0	1.17649
0.198019	0.769241	0.283688	0.769216	0.102302	0	0.125	0.0598802	0.103359	0.500004
0.0851062	0.476186	1.48152	0.425536	0.136986	0.253166	0.294116	0	0.0706713	0.444447
0.10582	0.465111	0.263157	0.434787	0.104712	0.0706713	0.465113	0.37736	0.0508906	0.377361
0.103627	0.173913	0.266668	0.192308	0.0514138	0	0.266667	0.0657895	0.31746	0
0.27027	0.206186	0.31746	0.0530504	0.32258	0.173913	0.148149	0.0626959	0	0.243903
0.133333	0.186916	0	0.277778	0	0.317461	0.769225	0	0.0533333	0.235988
0.103093	0.222222	0.147059	1.11112	0.0823046	0.169491	0.208334	0.487807	0	0.0524935
0.125787	0.232556	0.333331	0.12987	0.0527704	0.178041	0	0	0.416664	0.0520834
0.124224	0.571431	0.0873364	0.147059	0.238095	0	0	0.0735292	0.0607903	0.579709
0.229884	0.380952	0.303031	0.199004	0.0696865	0	1.05266	0.111111	0.0543478	0.0576369
0.141844	0.689651	0.246913	0.439559	0.0613497	0.263158	0.0925925	0.454541	0.0754716	0.101266
0.183487	0.155038	0.31746	0.392156	0.624994	0	0.232557	0.444443	0.0641026	0.0547945
0	0.143884	0.0687285	0.263157	0.16129	0.333333	0	0.227274	0.999988	0.195122
0.109891	0.571434	0.147059	0.18868	0.384615	0.188678	0.181818	0.103627	0.238096	0.0680273
0.153846	0.123457	0.0593471	0.298505	0.149254	0	0.41667	0	0	0.169491
0	0.121212	0	0.384615	0.273971	0.098039	0	0.101523	0.0696865	0
0.298507	0.28169	0	0.192308	0.0704226	0.22472	0.0539084	0	0	0.0526316
0.208332	0.799999	1.33333	0.172414	0.10989	0.104712	0.0854702	0.064935	0.0524935	0.0546448
0.119048	0.0682594	0.363635	0.909071	0	0.740741	0.186046	0.588238	0.0566572	0
0.16129	0.181818	0.476191	0.714292	0.249999	0.173913	0.571432	0.263158	0.476191	0.380955
0.114285	0.555559	0.194175	0.130719	0	0	0.571422	0.176991	0.0884956	0.0657894
0.689659	0	0	0.769241	0.21978	0.217392	0.147059	0.327867	0.0531916	0.109589
0.153847	0.172414	0.28169	0.0643085	0.294119	0.350878	0.341882	0.317458	0	0.149813
0.135135	0.5	0.165289	0.192309	0.170939	0.102041	0.0932402	0	0	0.0838576
0.128206	0	0	0.399997	0.222222	0.128205	0	0.714293	0	0.0516129
0.111732	0.270272	0.16529	0.196077	0.15625	0.101523	0.120482	0	0.350878	0
0	0.137931	0.434784	0.99998	0.0586511	0	0.0999997	0.370371	0.0615384	0.0508906
0.111732	0.327871	0.588227	0.246913	0	0.051282	0.16129	0	0.0511508	0.0530505
0.0772201	0.22472	0.869554	0.425531	0.096154	0	0.0684932	0	0.0515463	0.0529101
0.185186	0.425529	0.21978	0.625001	0	1.1111	0.0800001	0.0578035	0.0520833	0.0520834
0	0.183486	0.235293	0.173912	0.294119	0.0606061	0.263158	0.0877193	0.136519	0.0515464
0.156863	0.408164	0.392157	0.178571	0.444442	0.0634922	0.28169	0.133333	0	0.0997507
0.138409	0.145986	0.183486	0.215054	0.108696	0.0796812	0.062696	0.0925928	0.16129	0.0554017
0.289857	0.52631	0.30303	0.333334	0.169492	0.571431	0.0854701	0.0552486	0	0.152672
0.454545	1.48151	0.740746	0.512815	0.476194	0	0.408167	0.0544959	0.833334	0.104712
0.157481	0.547938	0.588228	0.124223	0.120482	0.110193	0.0766284	0.0514139	0.476191	0.0522192
0.500002	0.634913	0.294118	0.399999	0.15748	0.112045	0.0687284	0.0542005	0.0666667	0.051414
0.909078	0	0.108696	0.106952	0	0.102828	0	0.0869562	0.10989
0.181819	1.17645	0.384618	0.0547944	0.108696	0.0781248	0.350875	0.0529101	0.134228
0.17094	0.219779	0.416663	0.108108	0	0	0.0975609	0.217392	0.444446
0.454545	0.229885	0.95238	0.210526	0.155039	0.243901	0.0729928	0	0.126582
0.196078	0.55556	0.666664	0.138888	0.115607	0.555549	0.0943397	0.0520834	0.104712
0.235294	0.15625	0.121951	0.238095	0.178572	0	0	1.11112	0
0.454545	0.285713	0.165289	0.15748	0.0938964	0	0.0591715	0.0554017	0
0	1.1111	0.571432	0.243903	0.232559	0	0.140845	0.0865798	0
0.232559	0.0766284	0.512821	0.176992	0	0	0.243903	0	0.0511509
0.273972	1.59996	0.0943397	0.526316	0.0677965	0.052356	0.540545	0.134228	0.0966183
0.145986	0.228572	0.253166	0.833324	0.0529101	0.108696	0	0	0
0.266667	0.360363	0.122699	0.176992	0.465117	0.093458	0.287769	0	0.526313
0.188679	0.555548	0.186916	0.740731	0.131579	0	0.377357	0	0
0.303032	0.597016	0.115607	0.153846	0	0	0.210527	0.0851065	0
0.459774	0.754721	1.05263	0.138889	0.296298	0.0694444	0.333334	0.144928	0
0.203046	0.228571	0.0930233	0.540534	0.131147	0.0558659	0.294118	0.952371	0
0.58823	0.167363	0.196078	0.125786	0	0	0	0.363635	0
0.124223	1.6666	0.666659	0.800003	0.83332	0.298508	0.224719	0	0.0662252
0.336136	0.224719	0.125	0.714285	0.0677967	0	0.0586511	0	0.0696865
0.15873	0.224719	0.425534	0.0970875	0.0531915	0.16	0.322582	0.107817	0.0520833
0.289854	0	0.512821	0.15873	0.0662251	0.350876	0	0.21978	0
0.377358	0.50633	0.175439	0.152671	0.0524935	0.0790515	0.133333	0.216216	0.0617284
0.588241	0.15748	0.555551	0.512815	0.12987	0.476186	0	0.22472	0.0534759
0.21739	0.188678	0.512824	0.499999	0	0.0526317	0.357141	0.270272	0.0507614
0.350876	0.344831	0.168068	0.303032	0	0.689652	0.434782	0.437955	0.0518134
0.202021	0.243901	0.238094	0.625	0.108992	0.0574713	0.100503	0	0.05291
0.645162	0.15625	0.243902	0.689651	0	0	0.122699	0.465114	0.0900901
0.253165	0.277776	0.476191	0.645153	0	0.134228	0.0869564	0.224719	0.105263
0.0884957	0.119761	0.416663	0.206185	0.201005	0.144928	0.110497	0.106101	0
0.196078	0.95239	0.0613497	0.476186	0.153061	0.0520832	0.303031	0.100502	0.0524935
0.30303	0.476194	0.0966183	1.11108	0.102828	0.0542004	0.077821	0.333331	0
0.16	0.126583	0.645165	1.66668	0	0.0766285	0.285713	0.333335	0.186916
0.476196	0.588244	0.416663	0.370369	0	0	0.083682	0	0.145986
0	0.121212	0.256409	0.909082	0	0.0571428	0	0.0540542	0.41667
0.169492	0.476194	0.666659	0.476196	0.0641026	0.689659	0.083682	0.0516797	0
0.238097	0.303028	0.10582	0.298506	0.0888889	0.153846	0.0754717	0	0.13245
0.588245	0.416668	0	0.400002	0.303031	0.952393	0.416664	0	0.416664
0.127388	0.370371	0.124223	0.129032	0.102041	0.136518	0.0626959	0.106383	0.344826
0.479996	0.476186	0.799992	0.666678	0	0	0.124224	0.0539083	0.281691
0.888907	0.168067	0	0.95238	0.328948	0.116279	0.145985	0.0524934	0
0.22599	0.294118	0	0.124223	0	0.114943	0.909079	0	0.111421
0.256411	0	0.307692	0.307692	0	0.240963	0.161291	0.0533332	0.142857
0	0.2	0.172413	0.15748	0.0641027	0	0	0.0516796	0
0.107527	0.0727273	0.344826	0.112994	0.500002	0.0657896	0.163934	0.124224	0.125786
0.277777	0.526313	0.15748	0.249999	0	0.131579	0.338986	0.0537634	0.175439
0.110804	0.120482	0.377358	0.526319	0.408164	0	0.104712	0.0557103	0.0666668
0.29197	0.275229	0.0975608	0.540538	0.0711743	0.281691	0.153846	0.0527704	0.0520833
0.476186	0.20548	0.13245	0.13986	0.169492	0	0.0985221	0.0544958	0.303031
0.281691	0.213903	0.141844	0.190476	0.136986	0	0.140846	0	0
0.153846	0.169491	0.189572	0.183486	0	0.106383	0.454547	0.571426	0.0985223
0.173913	0.147602	0.74074	0.344828	0.0542005	0.050633	0	0	0.0869565
0.266668	0.459771	0.31008	0.196078	0.344826	0.176991	0	0	0.289857
0	0.465117	0.245398	0.35088	0	0.416663	0.0530505	0.0546447	0.148148
0.206186	0.434779	0	0.130719	0	0.340908	0.0539083	0.227273	0.169491
0.454546	1.24996	0.213904	0.384616	0.101781	0.17964	0.104712	0.084746	0.0515464
0.104712	0.363635	0.229885	0.263157	0.0536193	0.127659	0.232557	0	0
0.0598801	0.499994	0.246915	0.186916	0.869574	0.0699302	0	0.0591716	0.799998
0	0.106952	0.35088	0.799996	0.111732	0.050505	0.050505	0.0578035	0.170212
0.249999	0.128205	0.232557	0.338983	0.111421	0.09901	0.0854702	0	0.0531914
0.219779	0.31746	0	0.17094	0.154639	0	0	0.198019	0.09009
0.259741	0.240962	0.232559	0.222222	0.20202	0.588237	0	0.0823044	0.425536
0.263158	1.05263	0.163935	0.175439	0	0.18018	0.0566572	0	0
0	0.263158	0	0.21978	0	0	0.133333	0	0.084388
0.526316	0.769241	0.540544	0.35714	0.0515464	0.0647249	0.999988	0.0531915	0.476195
0.454545	0	0.256411	0.112995	0	0.0518135	0.0540541	0.111111	0.25641
0.124224	0.127388	0.152671	0.217391	0.138889	0	0	0	0.0869562
0.148148	0.186916	0	0.134228	0.104712	0.0518135	0.0675677	0.15625	0.209424
0.740732	0.123457	0.416668	0.19802	0.289856	0.0696865	0.054945	0.104987	0
0.526316	0.606052	0.526318	0.0888887	0.0813007	0.0526315	0.0510204	0.0531915	0.172414
0.119048	0.869558	0	0.246914	0.0766284	0.176991	0	0	0.129032
0.0787403	0.666662	0.27027	0.0689656	0.645161	0.281689	0.0524934	0.0524935	0.300751
0.243903	0.0913242	0.487804	0.135135	0.0666666	0.219781	0.095238	0.740731	0
0.152671	0.120482	0	0.27027	0.0781251	0	0.909091	0.0597015	0
0	0.134228	0	1.33335	0.0816327	0.100756	0.0576368	0.053476	0
1.05263	1	0.133779	0.115607	0.112359	1.29034	0.0539085	0	0.121212
0.120481	0.500004	0.26316	0.18018	0.152671	0.465117	0.0571429	0.104712	0.106383
0	0.203045	0.0784314	0.102041	0.0568182	0.205128	0	0.106952	0.17094
0.202021	0.22472	0.294118	0.408164	0.051948	0	0.0564972	0	0.0778211
0.363635	0.17094	0.52631	0.689644	0.0526315	0.311689	0.054496	0.210526	0.0763358
0.246912	0.800012	0	0.377362	0.0520834	0.106101	0.0571428	0.104712	0.212765
0.155039	0.152671	0.216216	0.52631	0.0671142	0.134228	0.0602409	0.105541	0.392156
0.526313	1.25002	0.259741	0.175439	0.118694	0.0519481	0.312502	0.232558	0
0.192307	0.379749	0.23952	0.208333	0	0.104712	0.0634921	0.106383	0.0751877
0.384618	0.89552	0	0.0823047	0.0552486	0.144927	0	0.117302	0.185185
0	0.292681	0.246915	0	0.106952	0.052356	0.0523561	0	0.0673401
0.357144	0.504206	0.199005	0.142857	0.130719	0.0930233	0	0.110803	0.133333
0.143884	0.52174	0.533337	0.151515	0.229884	0	0.0537634	0.0529101	0
0.500002	0.759498	0.555557	0.344825	0.555559	0.186916	0.0689654	0.0550965	0.181818
0.115607	0.128756	0	0.714279	0.123077	0.363638	0	0.0555556	0
0.425529	0.597013	0.0604228	1.42859	0.740732	0.222223	0.0540541	0.104987	0.194175
0	0.10989	0.16	0.392158	0.606061	0.118343	0.512821	0.0533334	0.152672
0.285712	0	0.254779	1.33331	0	0.104987	0	0.0738006	0.102828
0	0.113636	0.909071	0.799998	0.571428	0.0696864	0.0862071	0.0533334	0.05291
0.227273	0.769244	0.0966183	0.325205	0	0.102041	0.256411	0	0.0677967
0.19802	0.606061	0.555559	0.714292	0.0621117	0.0540541	0	0.0524934	0.0519481
0.10989	0.125	0	1.3793	0	0	0.714292	0.0524934	0.15873
0.18018	0.197045	0.166666	0.470587	0.0546448	0.0727273	0.148148	0.571426	0
0.238094	0.192308	0.10929	1.33333	0	0.104439	0.190476	0	0.277776
0.338986	0.233917	0.625007	0.597013	0.102828	0.103093	0	0.0552487	0.434787
0.256412	0.180995	0.0970874	0.285715	0	0.0527705	0.244898	0	0.0515465
0.322579	0.161291	0.246913	0.476194	0.162601	0	0.115607	0.0533334	0.153846
0.0843882	0	0.344831	0.185186	0.120482	0.0516796	0.10101	0	0.1227
0.303029	0.281692	0	0.833334	0.0643086	0.0566572	0.23256	0.0544959	0.0499999
0.140845	0.888907	0.25641	0.71429	0.47619	0	0.116279	0.104439	0.051151
0	0.353981	0.588245	0.238095	0.158311	0.0518135	0.0526316	0.0530504	0.0921657
0.140845	0.121212	0.999989	1.05261	0.0657894	0.0751881	0.465122	0.0540541	0
0.141844	0.113315	0.2	0.555557	0	0.0516796	0.0609756	0.104712	0
0.116279	0.33058	0	0.22472	0	0.740745	0.121951	0.0518135	0.16129
0.289857	0.215054	0.273975	0.229886	0.0529101	0	0.20202	0.0547944	0.11236
0.526314	0.499998	0	0.266668	0	0.0520833	0.0706714	0.104987	0.067114
0.149254	0.143885	0.124224	0.114285	0.0522193	0	0	0	0.115607
0	0	0	0.298507	0.106101	0.0719426	0	0.0515464	0.645153
0.181817	0.384616	0.232557	0.250001	0.399997	0.0518135	0	0	0.178572
0.123457	0.999999	0.0823048	0.145985	0.0692042	0.05698	0.0913242	0.10582	0.0735294
0.416663	0	0.540543	0.588238	0.0689656	0.0543478	0.425529	0.244898	0.0649351
0.172414	0.178572	0	0.102041	0.624994	0.0537636	0	0	0.123077
0.176992	0.363635	0.563387	0.285715	0.0904977	0.0511508	0.162601	0.0536193	0
0.0952382	0.240965	0.740727	0.149253	0.227273	0.105263	0.0854702	0.111421	0.487808
0.400002	0.350876	1.42856	0.307694	0.0851066	0.106383	0.0714286	0.434779	0
0.0980394	0.434784	0	0.384613	0	0.102302	0	0.0675675	0.0699301
0	0.416664	0.196078	0.210527	0.107239	0.0833332	0.0706714	0.104166	0
0.116279	0.18018	0.268458	0.12987	0.0873363	0.096154	0	0.208877	0.0714285
0	0.714285	0.210525	0.909078	0	0.118343	0.0696863	0.0542006	0.500002
0.588234	0	0	0.13245	0	0.151515	0.40816	0.0530504	0.645165
0	0.12987	0.102041	0.714295	0.115607	0.229884	0	0	0.0651465
0.0518133	0.338981	0.136987	0.555559	0	0.0701754	0.0630915	0	0.0516795
0.31746	0.298507	0.145985	0.384618	0.155039	0.155844	0.148147	0.0527704	0.0519481
0.52632	0	0.625007	0.0643086	0.243903	0.115607	0	0.333333	0.0519481
0.338982	0.25641	0.139373	0.500006	0	0	0	0.333332	0.0677966
0.176991	0.177778	0.141844	0.412369	0.0775194	0.312498	0.0584795	0.0873363	0.169491
0.363639	0.211641	0.784318	1.05261	0.10929	0.194174	0.0749063	0.0522193	0.0793653
0.4	0.615388	0.169491	0.212767	0.465112	0.127389	0	0.050505	1.9355
0.165289	0.312498	1.81819	0.377362	0.0684933	0.0523559	0.294119	0.0512821	0.116618
0.0597013	0.287772	0.092166	0.404039	0	0.370373	0.0682596	0.0526316	0.06734
0.540544	0.606062	0.606061	0.055866	0	0.0660065	0	0.0909091	0.0552487
0.13986	0.533329	0.645162	0.303031	0.0619196	0	0	0	0.054945
0.27027	0.175438	0.072993	0.377362	0.338983	0.0520834	0.434784	0.0520834	0.0634921
0	0.277779	0.13793	0.909079	0.246913	0.121212	0.0772199	0	0
0.196079	0.253166	0.43956	0.571434	0	0.0657894	0	0.163934	0
0.370369	0.11236	0	0.799996	0.111111	0.769244	0.108696	0	0.0995027
0	0	0.217392	0.416663	0	0.0583091	0.111111	0.107527	0.0549451
0.204081	0.136986	0.350878	0.499999	0	0	0	0.0530504	0
0.454545	0.425535	0.0869565	0.465111	0	0.103896	0.476191	0	0
0	0.11236	0	0.123457	0.212765	0.054054	0.624994	0	0.126582
0.117647	0.259739	0.194175	0.408167	0	0.0515464	0	0.103359	0.0515463
0.909071	0.666677	0.740754	0.434787	0.190477	0.051948	0.392155	0.214477	0.185185
0.173913	0.30075	0	0.714292	0	0.0534759	0	0.344828	0.140845
0.294119	0.294116	0.145985	0.465111	0.52631	0	0	0.0649352	0.138889
0	0.111421	1.17646	0.833334	0.0704225	0.869558	0.0813007	0.111111	0.0970875
0.229884	0.210526	0.121951	0.392157	0	0.0583091	0	0	0
0	0.15625	0.235295	0.104167	0.0524935	0	0.434782	0.0537635	0.0892857
0.555554	0.476196	0.624996	0.144927	0.110193	0.104712	0.0655738	0.11396	0.162601
0.190476	0.444447	0	0.555549	0.0544959	0.0516797	0.162601	0.160428	0.117647
0.121213	0.392154	0.384615	0.172414	0.689644	0.106383	0.08658	0.209424	0.0539084
0.115607	0	0.0680274	0.18018	0.166666	0.0543478	0.253163	0.0520832	0.0526315
0.0966184	0.162602	0.526315	0.224718	0	0.0530504	0	0.0746269	0.110498
0.109289	0.111732	0.229884	0.155039	0	0	0.0947867		0.102828
0.27027	0.357141	0.769227	0.689651	0	0.102302	0		0.0552486
0.114942	0.32787	0	0.512823	0.156658	0.0819672	0.0516796		0.162602
0.172414	0.185185	0.129871	0.253165	0	0.0540541	0.0508907		0
0.10989	0.425531	0.16529	0.240963	0.454549	0.0518134	0.408165		0.0826447
0	0.147059	0.162601	0.12987	0	0.0536194	0.134229		0.178572
0.263157	0.512822	0.416666	0.270271	0.476194	0.35714	0.273973		0.0537635
0.312502	0.373831	0.500005	0.210527	0	0.291972	0.116959		0
0.175439	0.168067	0.222221	0.344826	0.111732	0.465111	1.05266		0.0529101
0.147058	0.459775	0.114943	0.800012	0.263158	0.106101	0.0520835		0.0514139
0.425529	0	0.289854	0.370369	0	0.0508906	0.11976		0.106383
0.0947867	0.168067	0.169491	0.08658	0.107817	0.0668897	0.0512821		0.0539083
0.210526	0.487804	0.689651	0.18868	0	0.105541	0.0569801		0.053476
0.769241	0	1.81817	0.118343	0	0.41667	0.143885		0.465114
0.125	0.208333	0.425534	0.0749066	0.101523	0.176991	0.121952		0
0.470593	0.416663	0.199999	0.487802	0.246913	0.0543478	0.054054		0.127388
0.370369	0.136986	0.245398	0.155039	0.07326	0.219779	0.0547946		0.377357
0.202021	0.392155	0	0.416671	0.204082	0.155038	0.054496		0
0	0.168067	0.246914	0.869555	0.15873	0	0.0673402		0
0.207253	0.194175	0.76923	0.571426	0.212766	0.28777	0		0.121212
0.396041	2.10537	0.83332	0.392158	0.106666	0.270271	0		0
0.833321	0.465121	0.454547	0.119048	0.34483	0	0.0539084		0.0560224
0.449435	0.366969	0.307692	1.17645	0	0.0555556	0.0560225		0
0	0.314959	0.217393	0.298508	0.108108	0.102041	0.0660065		0.0692042
0.081967	1.73907	0.606055	0.526316	0	0.169492	0		0.869558
0	0.416664	0	0.909095	0.0510204	0.104712	0		0.294118
0.655736	0.373835	0.930245	1.25	0.204082	0.0505051	0.0760457		0.0881055
0.129032	0	0.298509	0.25974	0.103359	0.0501253	0		0
0	0.175439	0.167364	0.624994	0.0803214	0.0519481	0.270271		0.101523
0.512815	0.114943	0.199999	0.162601	0.0547945	0.0511508	0.130719		0.0515465
0.540543	0.264318	0.161943	0.253166	0.0800003	0.0757577	0.769216		0.298506
0.869574	0.320858	0.31746	0.769244	0	0.83334	0.263159		0
0.192308	0.461541	0.425529	0.333331	0	0.0607902	0
0.197043	0	0.0921657	0.217391	0.740737	0.444447	0.194175
0.223464	0.322581	0.434782	0	0.0519481	0.064935	0
0.41667	0.170213	0.487799	0.4	0.0579712	0.152672	0.0858369
0.909071	0.151516	0.119761	0.240966	0.175439	0.0524934	0
0.634929	0.540535	0.444442	0.169491	0	0.0740741	0.0680273
0.384618	1.33334	0.666659	0.58823	0.0722023	0	0.178572
0.123457	1.15941	0.28777	0.400002	0.157481	0.0980391	0.113636
0.249999	0.252366	1.81814	0.61538	0.112994	0.571434	0.5
0.137457	0.303029	0.189574	1.37932	0	0.25	0.0593471
0.149254	0.155843	0	0.283688	0.130719	0.15625	0.0540541
0.330579	0.269057	0.0727272	0.481933	0.178572	0.363638	0.303031
0.202021	0	0	0.236686	0.277777	0.185185	0.0862068
0.4	0.150375	0.142857	0.799999	0	0	0.0641025
0	0.309281	0	0.285715	0	0.0806451	0.0568181
0.606062	0.194175	1.81823	0.256412	0.0684933	0.10929	0
0.235294	0.297028	0.153846	0.31746	0	0.0523559	0
0.281691	0.952391	0.106383	0.232558	0.125	0.129032	0.0735295
0.116279	0.459774	0.952387	0.645162	0.588238	0.0506329	0.0563379
0	0.126984	0.198021	0.540534	0		0.0574712
0.196079	0.76922	0.222222	0.454549	0.062893		0.0518134
0.124611	0.833349	0.487805	0	0		0.392155
0.229884	0.38961	0.25974	0.194175	0.13986		0
1.05261	0.480003	0.149254	0.210526	0.116279		0.338982
0.588238	1.17645	0.256411	0.0943396	0		0.0687285
0.20202	0.200001	0.869554	0.499999	0.113636		0
0.215054	0.0660793	0	0.624994	0		0.425532
0.634926	0.46154	0.540545	0.799999	0		0.10929
0.168068	0.10929	0.27778	0.512815	1.17645		0.32787
0.481928	0.400004	0.16529	0.168067	0.217391		0.054054
0.189573	0.155642	0.666662	0	0.0833331		0.136519
0.0760457	0.32258	0	0.597015	0		0.810807
0.333332	0.312502	0.246914	1.4815	0.392159		0
0	0.186916	0.31746	0.322581	0.0719424		0
0.180995	0.296294	0.357145	0.229883	0.95239		0
0.273973	0.579707	0.377361	0.408162	0.869558		0
0.132451	0	0	0.287769	0.079365		0.0518135
0.444443	0.526315	0.294117	0.454546	0.0714286		0.289856
0.111732	0.449437	0.18018	0.506324	0.178572		0.069204
0	0.38095	0.350879	0.740745	0		0.178571
0.101523	0	0	0.254778	0.769244		0.0813008
0.208333	0.402686	0.357146	0.21739	0		0.465117
0.149253	0.168539	0.129871	0.533336	0.138889		0.134228
0.227273	2.50008	0.512825	0.476191	0.134228		0.15625
0.0968524	0.30075	0	0.519476	0.0862066		0.176991
0.666669	0.540534	0.259739	0.242425	0.222222		0.0796811
0.162601	0.172413	0.150376	0.416663	0.377358		0
0.153846	0.555553	0.32787	0.210526	0		0.0520834
0.153846	0.305345	0.186046	0.196077	0.0809719		0.07722
0.74073	0.540543	0.256412	0	0.103627		0
0.465117	0.170213	0	0.476186	0.238095		0
0.0680272	0.588226	0.909106	0.289855	0		0.059347
0.52632	0.624997	0.0869566	0.227273	0.0591715		0.0542006
0.0781251	0.63492	0	0.312501	0.714277		0.058997
0	0.117994	0.416663	0.909074	0.16		0.0576369
0.526316	0.281688	0.0829875	0.266665	0		0
0.102564	0.408167	0.327871	0	0.123456		0.0520833
0.555557	0.727272	0	0.869558	0.1		0.769225
0	1.21215	0.131579	0.434787	0		0.0552487
0.322582	0.243903	0.273972	0.102041	0.350876		0.181818
0.0711744	0.404043	0.133333	0	0.645153		1.05266
1.42855	0.283688	0.253165	0.327868	0		0
0.102564	0.449441	0.133334	0.136987	0.0904978		0.206186
0.196078	0.689654	0.14652	0.144927	0.104166		0
0	1.42858	0.740746	0.571423	0.0684932		0.15625
0.277777	0.275861	0.384617	0.168068	0.108696		0
0.183486	0.0943399	0.168068	0.769241	0		0.0542006
0	0.108696	0.338986	0.333332	0.259741		0.0632912
0.164608	0.425532	0.677971	0.666659	0.145985		0.0619195
0.15	0.136986	0.344828	0.204081	0.176991		0.277778
0.157895	0.10989	0.178571	0.298508	0.0531915		0.0740743
0.131579	0.32258	0.377356	0.571423	0.207254		0
0.404043	1.11112	0.238096	0	0.0751882		0
0.266669	0.476194	0.109289	0.327869	1.05265		0.0536193
0.512823	0.399999	1.05263	0.37736	0.259739		0.500004
0.145455	0.128205	0	0.238095	0.125		0.189873
0.307694	0.416671	0.16129	0.465122	0		0.500004
0.487804	0.307693	0.213904	0.714283	0.204082		0.500004
0.253164	0	0	0.499998	0.0854699
0.277779	0.094787	0.0938964	0.322581	0.0858368
0.259742	1.24999	0	0	0.101523
0.119761	0	0.0980393	0.186916	0
0.210528	0.112994	0.563382	0.444447	0.0515464
0	0.141844	0.330579	1.24999	0.0904977
0.588245	0.25641	0	0.186916	0
0.102041	0.178572	0.121212	0.270269	0.227273
0	0.487807	0.303032	0.152671	0.103627
0.588245	0.259741	0.25	0.363636	0.392155
0.689664	0.434787	1.17649	0.645153	0.0854702
0	0.158731	0	0.606055	0.0536193
0.408167	0	0.0990097	0.624996	0.476195
1.6666	0.207253	0.645162	0.102564	0.555559
0.540534	0.526313	0	0	0
0.142858	0.110497	0.080645	0.769227	0.0526316
0	0.187793	0	0.166666	0.093897
0.123839	0.305343	0.150376	0.238095	0.392155
0.909074	0.18868	1.11113	0.152672	0.322579
0.251574	0.222222	1.25001	0.250001	0
0.0934583	0.32258	0.327871	0.151515	0.229884
0.769241	0.130719	0	0.243901	1.42859
0.740732	0.21978	0.10204	0.408161	0.0719425
0.163935	0.666669	0.588237	0.188679	0.05291
0.210526	0	0.224719	0.263158	0
0.27027	0.350878	0.571424	0	0
0.5	0.909078	0.416665	0.188679	0.051151
0.833343	0	0.384617	0.714285	0.100502
0.465114	0.15625	0.217391	0.425532	0
0.158731	0	0.194175	0.256409	0.0555556
0.281689	0.388349	0.149254	0.119048	0.0524933
0.0823047	0.225989	0.298505	0.384612	0.050505
0	0.188678	0.606058	0.173913	0
0.127388	0.235295	0.512816	0.400002	0.0666667
0.930227	0.714279	0	0.465122	0.144404
0.179371	0.540546	0.227273	0.399998	0
0.363638	0	0.384613	0.952387	0
0.555554	0.303031	0.116959	0	0.112994
0.10101	0.13245	1.11108	0.145986	0.170213
0.152672	0.400003	2.22218	0	0
0.363638	0.208334	0.303028	0	0.0529101
0.487807	0.238096	0.0724638	0	0.103093
0.459773	0.111111	0.500005	0	0.104439
0	0.357144	0.147059	0	0.107527
0.499995	0	0.350879	0	0.111421
0.634929	0.95239	0.136054	0	0.137931
0.209424	0.909079	0.202019	0	0.0947867
0	0	0.366971	0.0664452	0.103359
0	0.344825	0.421058	0.307694	0.106952
0.0550965	0.0858368	0.2649	0.0952381	0.0961536
0.487807	0.399997	0.166667	0.273973	0.25641
0.0890868	0.27778	0.25	0.338983	0.0645162
0.689651	1.24996	0.188679	0.173161	0.285712
0.0833334	0.337077	0.270269	1.33332	0
0	0.196721	0.212766	0.784318	0
0.333335	0.379746	0.123457	0.487808	0.0900898
0.465112	0.550457	0	0.388349	0
0.400002	0.624994	0.212766	0.22472	0.192308
0.37736	0.425532	0.16	0.23256	0
0	0.799999	0.119048	0.136987	0.370372
0.526316	0.454541	0.270271	0.384615	0.103093
0.125	0	0	0.444447	0.238095
0.199999	1.17645	0.606062	0.185185	0.0539084
0.104167	0.0772201	0	0.350877	0.281691
0	0.182649	0.0516796	0.416668	0.0694445
0.200001	0	0.0619195	0.173913	0.111111
0.0772202	0.185186	0	0.47619	0.054945
0.136986	0	0.714295	0.246913	0.054348
0.239519	0.176991	0.273974	0.243901	0.0675675
0.487808	0.208334	0	0.400002	0.0666666
0.0970874	0.130719	1.66671	0.181817	0.0527705
0.207254	0.454547	0.333335	0.624994	0.0550964
0.888907	0.208334	0.162602	0.19802	0
0	0.136986	0.526318	0.32258	0.0543479
0.138889	0.714295	0	0.220994	0.0602408
0.115942	0.307693	0.136987	1.00001	0.0550964
0.107527	0.493828	0.106383	0.67796	0
0.222223	0.15444	0.338982	0.152671	0
0.10582	0.869582	0.363634	0.408167	0.0634921
0.0711744	1.29036	0.317458	0.243901	0
0.0816327	0.975604	0.259739	0.235293	0
0.16129	0.366972	0.273973	0.338983	0
0.547943	0.233916	0.58823	0.246914	0.294119
0.465112	0.571429	0.144928	0.0526316	0
0.322579	0.190476	0.444446	0.175439	0.143885
0.126984	0.0881059	0.333332	0.869574	0.266665
1.11108	0.526315	0.199999	0.476186	0.392158
0.204082	0.231213	0.833334	0.689659	0.338985
0.606052	2.1053	0.18868	0.303031	0
0.666663	0.615386	0.317459	0.157481	0.0514139
0.121212	0	0.34783	0.232559	0.15625
0.232556	0.112994	0.357144	0.1	0.104439
0	0	0.273972	0.212765	0.0854701
0.0990098	0.169492	0.624992	0.476195	0.204081
1.11112	1.21215	0.666664	0.263158	0.384612
0.0968522	0.909076	0.624996	0.192308	0.0985223
0.330581	0.180995	0.555559	0.392154	0.606065
1.02563	0.245399	0	0.077821	0
0.487808	0.144927	0.0790515	0.232559	0.110497
0.754707	0.208333	0.350878	0.229885	0.106952
0	0.333332	0.0970874	0.19802	0.0873362
0.0526317	0.217391	0	0.0833333	0.0921661
0.196078	0.377357	0.0743493	0.140845	0.25
0.162602	0.185185	0	0.392155	0
0.400002	0.155038	0.869558	0.384614	0.103896
0.294118	0.2	0.44944	0.107527	0.0668896
1.33331	0.571422	0.493825	0.227273	0.0530504
0.176991	0	0.0921658	0.31746	0.103627
0.142857	0.210527	0.62499	0.180181	0.27027
0.71429	0.115607	0.416667	0.051948	0.416669
0.188679	0.112359	0.102564	0.512818	0.0833332
0.512824	0.169492	1.42858	0.102564	0.289855
0.253166	0.0865803	0.152091	0.222222	0.0934581
0.408163	0.275861	0.106101	0.155039	0.606062
0.215054	0.117994	0.666667	0.266668	0
0	0.851063	0.103627	0.338986	0.130719
0.15625	0	0.408161	0.333333	0
0.0952381	0.64517	0.350876	0.606061	0.0803212
0.165289	0.0602409	0.408168	0.183487	0
0.108695	0.11236	0	0.540545	0.0506329
0.0934578	0	0.540545	0.0975611	0.0524935
0	0.41667	0.74073	0.444447	0.714293
0.357146	0.666662	0	0.512818	1.17649
0.114286	0.0999999	0.210525	0.168066	0
0.224719	0.117647	0.123456	0.215054	0.0613497
0.294116	0	0.999982	0.95238	0.0583091
0.666659	0.0884955	0	1.53851	0.0543479
0.174672	0.0613497	0.217392	0.952379	0
0	0	0.799984	0.285714	0.101523
0.0763361	0.163935	0.526319	0.215054	0.246913
0.246914	0.0975607	0	0.0990102	0
0.0934577	0.0913243	0.181818	0.0520833	0.0675676
0.253164	0.246912	0.13986	0.606062	0
1.81824	0	0.526321	0.120482	0
0.322582	0.13245	0.0620155	0.384615	0
0.0930233	0.370366	0.373831	0.500006	0.147059
0.289855	0.0896859	0.0792081	0.571434	0.0784315
0.173913	0.256409	0.833343	0.273974	0.0854699
0.119048	0.444447	0.0816326	0.384613	0
0.112995	0.208334	0.465112	0.0716848	0
0.37037	0	0.114285	0.0909089	0.173914
0.105263	0.487802	0.125786	0.210527	0.125
0.169492	0.266669	0.129032	0.740746	0.52631
0	0	0.151515	0.400002	0
0.307694	0.519477	0.444442	0.19802	0.0519481
0.43478	1.08109	0.444442	0.178571	0.0638978
0.183487	0.437952	1.25001	0.487804	0.0763361
0.444445	0.207611	1.25003	0.113636	0.136986
0	0.15544	0.084388	0.571422	0.0877193
0.769224	0.810798	0.13986	0.266668	0.115274
0.606061	0.722889	0.16129	0.55556	0.0619195
0.143885	0.517235	0	0.121212	0.285715
0.689652	0.120482	0.0803214	0.606065	0
0.190475	0.263159	0.909091	0.32258	0.051948
0.208333	0.491803	0	0.155039	0.060423
0.263158	1.03448	0.125786	0.95239	0.142858
0.476193	0.365855	0.131579	0.136055	0.0555556
0.185185	1.46337	0	0.175439	0.0704224
0.118343	0	0.240964	1.11113	0.555553
0.172414	0.173913	0	0.176992	0.0869562
0.204083	0.0809719	0.11976	0.689644	0.0558659
0	0.470591	0.270269	0.714277	0.16
0.800003	0.165289	0.114286	0.224719	0
0.500002	0.434786	0.714284	0.149254	0.0784315
0.259739	0.169492	0.0829875	0.396037	0
0	0.689644	0.357142	1.05261	0.0533333
0.108696	0.48193	0.357142	0.0847459	0.666658
0.0990101	0.303031	0.370366	0.246914	0.298506
0.210525	0	0.277778	0.588228	0.10101
0.540543	1.17649	0.17094	1.17646	1.1765
0.47619	0.314138	0.0952379	0.15625	0.210526
0.169492	0.78948	0.16529	0.289854	0
0.317463	0.186915	0.140846	0.384612	0.0851064
0.163935	0.413794	0.666675	0.481931	0
0.799984	0.22388	0.35714	0.129032	0
0.909082	0.155844	0.34188	0.769235	0.216802
0	0.2649	0.171674		0.173913
0.30303	0.833336	0.114942		0.185185
0.465112	0	0.227273		0
0.714277	0.759484	0.327869		0.689652
0	0.0884957	0.0775195		0.0615384
0.307694	0.0694444	0		0
0.0775196	0	0.259741		0.666662
0.136986	0.370372	0.0970875		0.0589971
0.377357	0.217391	0.0851061		0.103093
0.799996	0.208334	0.0716846		0.246913
0.185184	0	0.119761		0.392153
1.05263	0.769216	0.289855		0.624996
0.183487	0	0.0680273		0
0.147059	0.952371	0		0.135135
0.149254	1.81824	0.212766		0.123457
0.210527	0.0790515	0.192308		0.625001
0.357144	0.134228	0.172415		0.0568182
0.138889	0	0.350877		0.0522193
0.256411	0.183486	0.272107		0.408163
0.0568182	0.487802	0.192307		0.289857
0.2	0.400002	0.754724		0.0854699
0.173913	0.312502	0.279721		0.16129
0.222222	0.118343	0.181818		0.155642
0.10101	0.322579	0.294118		0.597012
0.384615	1.05264	0.0856532		0.205479
2.00006	0.481933	0.080645		0
0.0865802	0.0790511	0.0806451		0.184331
0.149254	0.138889	0.500003		0
0	0.0550963	0		0.163043
0.0531914	0.232557	0.0836818		0.0514139
0.116959	0	1.5385		0.869558
0		0		0.125
0.444444		0.100502		0.253164
0.085837		0.06993		0
0.350877		0.344827		1.37934
0.666669		0.666667		0.106667
0.606058		0.235293		0
0		0.130719		0.140845
0.32787		0.0881056		0
0.350876		0.0671139		0.227273
0		0.0540542		0.0854701
0.162602		0		0.253166
0.31746		0.116959		0
0.127388		0.303029		0.156862
1.17648		0.116279		0.264901
0.235294		0.298509		0.162602
0.298507		0.243901		0
0.17094		0.0687284		0.500004
1.6		0.307694		0.105263
0.373831		0.129032		0
0.816322		0.454546		0.285714
0.213904		0		0
0.174673		0.196078		0.128205
0.493828		0.341881		0.0743494
0.975611		0.223464		0.0694444
0.190476		0.238094		0.119761
0.363636		0		0.416669
0.149254		0.363639		0
0.194175		0.399996		0.322582
0.363636		0.192307		0.322579
0.344828		1.53844		0.666662
0.32258		0.307693		0.110498
0.740732		0.322581		0.0552486
0.217392		0.166666		0.166667
0.392158		0.350879		0.150376
0.263159		0.312497		0
0.181819		0.217391		0.425532
0		0.119047		0.425531
0.194174		0.357145		0
0.194174		0.227272		0.128206
0		0.124224		0.714295
0.555554		0.176991		0.263158
0.350878		0.138888		0.0970875
0.181818		0.312501		0
0.222223		0.0826446		0.285715
0.666663		0.95238		0.0701755
0.645167		0.444442		0.83334
0.303031		0.240964		0.169492
0.192308		0		0.215053
0		0.153847		0.408161
0.224718		0.465119		0.606065
0.227272		0.206186		0.285714
0.512815		0.076923		0.298508
0.175439		0.499998		0
0.909082		0.571427		0.333335
0.196079		0.112994		0
0.666664		0		0.212766
0.127389		0.168068		0.163265
0.112359		0.0913245		0.103896
0.106383		0.322579		0.166666
0.253165		0		0
0.377356		0.0508907		0.169491
0.103093		0.0630914		0
0.449441		0.135135		0.229884
0.353985		0.151515		0
0		0.327868		0.181817
0.190476		0.204081		0.689644
0.235294		0.57142		0.359713
0.625002		0.181818		0.23739
0.259741		0.117647		0
0.111732		0.624992		0.116959
0.430106		0		0.625001
0.153256		0.0793652		0.166666
0.563385		0.298505		0.208332
0.512825		0.425533		0.350878
0.344826		0		0.172414
0.740731		0.0549451		0
0.95236		0.408162		0.16129
0.277777		0.0751882		0.16129
0.153846		0.175439		0.078125
0.166666		1.17649		0.0934579
0.222221		0.338985		0
0.185186		0		0.243903
0.103093		0.540545		0
0.150944		0.111111		0.327871
0.125		0		0.714293
0.294116		1.53852		0.0829876
0		0.399996		0.0826445
1.42858		0.243903		0.512815
0.540545		0.095694		0.125
0.125		0.714295		0.0995024
0.344827		0.0823043		0
0.606062		0.71428		0.166667
0.740741		0		0.165288
0.32787		0.0651466		0.0854704
0.298507		0.15625		0.111732
0.273973		0.425533		0.416668
0.606064		0.13986		0
0.347828		0.689659		0.1
0.272109		0.563382		0.227274
0.213903		0		0.322579
0.170213		0.133333		0.183486
0.198021		0.270269		0.714293
0.22472		0.294119		0.444449
0.273973		0.249999		0.173913
0.253165		0		0
0.370369		0.176992		0.235294
0.322579		0.0904979		0.0816327
0.666659		0.176991		0.526315
0.169492		0.869554		0.161291
0.148148		0.147059		0.227273
0.47619		0		0.121951
0.294116		0.13986		0.392155
0.198019		0.189574		0
0.606058		0		0.377357
0		0.102564		0.540545
0.217392		0.31746		1.05266
0.217392		0.219779		0.108108
0.540538		0.869564		0.37037
0.322579		0.298508		0.0651466
0.204081		0.350879		0.186917
0		0		0.0775194
0.258066		0.173913		0.0896859
1.66671		0.204082
0.325205		0.555556
1.90481		0.588238
1.14288		0.114943
0.615389		0
0.701744		0.0975611
0.388346		0.45455
0.347825		0.799998
0.487807		0
0.689659		0.123457
0.909074		0.101523
0.222223		0.19802
0.307694		0.10582
0.210527		0.476193
1.11108		0.163934
0		0.196077
0.270271		0.176991
0.118343		0.148148
0		0.571426
0.162601		0.112995
0.206184		0.145985
0		0.465112
0.689659		0.136987
0.370368		0.062112
0.869558		0.104712
1.25003		0.169492
0.208333		0.175438
0		0.392156
0.32787		0
0.740731		0.215053
0		0.322579
0.357142		0.115607
0.0694443		0.224719
0.0735295		0.0980392
0.487807		0.0574711
0.134228		0.127389
0.526317		0.176991
0.217392		0
0.0514139		0.18868
0.166667		0.081301
0.270269		0.127191
0.606061		0.243903
0.166666		0.28169
0.208334		0.392158
0		0.273974
0.270271		0.454547
0.117647		0
0.338986		0
1.33337		0.108401
0.0913243		0.0537633
0.0537635
0.0609756
0.499999
0.555557
0.161291
0.238095
0.16
0.180181
0.571431
0.111732
0.645161
0.416668
0.10989
0.0520833
0.0757574
0.144928
0.153846
1.02562
0.157481
0.341881
0.396042
0.769241
0.31746
0.0877192
0.344826
1.66671
0.999996
0.434783
0.363635
0.294119
0.465117
0.137931
0.256409
0.227272
0.18868
1.11113
0.579717
1.17644
0
0.347823
0.150376
0.0735293
0.111732
0.238095
0.312498
0.37736
1.42855
1.33337
0.122699
0.20202
1.14288
0.353981
0
0.10929
0.240964
0
0.0881059
0.232559
0.137931
0.454546
0.563385
0.199005
0.298508
0.624995
0.305342
0
0
0.148148
0.132451
0.253164
0.350878
0.16
0.256411
0.0917432
0.229884
0.178571
0.273974
0
0.126582
0
0.120482
0.999988
0.256411
0.287771
0.30769
0.487809
0.41237
0.137931
0.217391
0.285714
0.17857
1.02565
0.216216
1.05266
0.769224
0.202703
0.0738006
0.563386
0.176212
0.115607
0.253163
0.909082
0.102041
0.0518134
0.206186
0.425532
0.869558
1.11108
1.33334
0.975604
0.869574
0.231214
0.174673
0.121951
0.625007
0.10582
0.499999
0
0.327867
0.166666
0
0.183486
0.249999
0.287771
0
0.476191
0.143885
0.188679
1.11112
0.34483
1.53843
0.107527
0.176991
0.191387
0.909074
0.164609
0.178571
0.833343
0.166666
0.145986
0.384614
0
0.526315
0.17094
0
0.95238
0.322581
0.243901
0.277778
0.57143
0.454545
0.512821
0.186915
0.338984
0.344827
1.21212
0.655737
0.392152
1.33336
0.659344
0.368097
0.207613
1.24999
0.337079
0.181818
0.512815
0.95236
0.769216
0.555557
0.198021
0.740732
0.192309
0.145986
0.227273
0.215054
0.256411
0
0
0.0938966
0.499999
0.740741
0.310077
0.296295
0.175439
0.163934
0.625002
0.16
0.606061
0
0.235294
0.0716845
0.645167
0.58823
0
0.2
0.392153
0.677974
0.689651
0
0.185186
0.305341
1.05263
0.195123
0.999996
0.341883
1.17646
0.625003
0.430111
0
0.338981
0
0.416664
0.15625
0.150376
0.124224
0.0557103
0
0.0522194
0.259739
0.105263
0.344825
0.153846
0.327869
0.259739
0.149254
0.06006
0.487807
0.350875
0.131579
0.185184
0.0961536
0.512824
0.476194
0.136054
0
1.33331
0.222223
0.115607
0
0.0510203
0.0692042
0.350876
0.0925923
0.40816
0.111111
0.327869
0.17094
0
0.256409
0.169491
0.131579
0.105263
0.714277
0.444446
0.0709219
0.0854701
0.0699303

## Sheet: Recue
Rescue per min
Control	BUB-1	HCP-1	BUB-1+HCP-1	CLS-2	CLS-2R970A	BUB-1+CLS-2	HCP-1+CLS-2	BUB-1+HCP-1+CLS-2	BUB-1+HCP-1+CLS-2R970A		Descriptive statistics	Control	BUB-1	HCP-1	BUB-1+HCP-1	CLS-2	CLS-2R970A	BUB-1+CLS-2	HCP-1+CLS-2	BUB-1+HCP-1+CLS-2	BUB-1+HCP-1+CLS-2R970A		ANOVA summary										ANOVA summary
0	0	0	3.33339		3.33331	0	8.00007	0	0		Number of values	1054	672	797	655	643	393	431	319	379	244		F	39.15									F	7.865
0	0	0	0			0		0	0														P value	<0,0001									P value	<0,0001
0		0			3.99989	0		0	0		Minimum	0	0	0	0	0	-20	-20	0	0	0		P value summary	****									P value summary	****
0	0	0	0		6.66639	6.66652	13.3322	5.00009			25% Percentile	0	0	0	0	0	0	0	0	0	0		Significant diff. among means (P < 0.05)?	Yes									Significant diff. among means (P < 0.05)?	Yes
0	0	0	0	20.0058	4.0002		9.99937	0	0		Median	0	0	0	0	1.7	1.7	0	4	0	2.5		R squared	0.05943									R squared	0.0161
0		0	0	12.0002	4.00028	0	7.99975	6.66677	0		75% Percentile	0	0	0	0	5	4	2.5	10	2.9	5
0	0	0	0	9.99918	13.3322	10.0004	4.99995	0	5.00007		Maximum	30	10	20	8	44	20	60	148	468	20		Brown-Forsythe test										Brown-Forsythe test
0		0	0		10.0002	0	2.85714	0	1.99993		Range	30	10	20	8	44	40	80	148	468	20		F (DFn, DFd)	32,87 (9, 5577)									F (DFn, DFd)	4,608 (5, 2403)
0	0	0	0	6.66608	4.99988	10.0004		0															P value	<0,0001									P value	0.0003
0		0	0		4.99992		6.6663	9.99972	1.53847		10% Percentile	0	0	0	0	0	0	0	0	0	0		P value summary	****									P value summary	***
0		0	0		0	9.99939	3.99982	20.0009	2.5		90% Percentile	0	0	0	0	10	6.7	6.7	15	6.7	9.3		Are SDs significantly different (P < 0.05)?	Yes									Are SDs significantly different (P < 0.05)?	Yes
0	0	0	0	5.00009	4.00028	0	2.50009	5.00015
0	0		0	0	0		19.9984	2.00007	0		95% CI of median												Bartlett's test										Bartlett's test
0		0	0	0		0	15.0003	0	6.66691		Actual confidence level	95%	95%	95%	96%	95%	96%	96%	96%	96%	95%		Bartlett's statistic (corrected)	12712									Bartlett's statistic (corrected)	2450
0	0	0	0	0		0	3.33331	0	1.17644		Lower confidence limit	0	0	0	0	0	1.1	0	3.3	0	1.7		P value	<0,0001									P value	<0,0001
0	0		0	0		0		0	0		Upper confidence limit	0	0	0	0	2.1	2.2	0	5	1	2.9		P value summary	****									P value summary	****
0	0	0	0	20.0004	4.99992	0	19.9983	0	4.00011														Are SDs significantly different (P < 0.05)?	Yes									Are SDs significantly different (P < 0.05)?	Yes
0	0	0	0	0							Mean	0.2	0.11	0.23	0.12	3.5	2.6	1.9	6.9	3.3	3.3
0	0	0	2.85727		2.85735	0	4.00003	4.44438	0		Std. Deviation	1.5	0.84	1.2	0.74	5.4	3.7	4.8	13	24	4		ANOVA table	SS	DF	MS	F (DFn, DFd)	P value					ANOVA table	SS	DF	MS	F (DFn, DFd)	P value
0	0		0		1.81808			0	0		Std. Error of Mean	0.047	0.033	0.042	0.029	0.21	0.18	0.23	0.72	1.2	0.25		Treatment (between columns)	19949	9	2217	F (9, 5577) = 39,15	P<0,0001					Treatment (between columns)	5094	5	1019	F (5, 2403) = 7,865	P<0,0001
0	0	0	0		0	0		0	0														Residual (within columns)	315720	5577	56.61							Residual (within columns)	311288	2403	129.5
0	0	0	0	11.4294	6.66673	0	0	0	0		Lower 95% CI of mean	0.11	0.051	0.14	0.061	3.1	2.2	1.4	5.5	0.85	2.8		Total	335669	5586								Total	316382	2408
0	0		0	0	0	0			6.6664		Upper 95% CI of mean	0.3	0.18	0.31	0.17	3.9	3	2.4	8.3	5.7	3.8
0		0	0	26.6661	5.00007	0	9.99991	0	2.00004														Data summary										Data summary
0	0	0	0	9.99985	0	10		0			Coefficient of variation	749%	737%	531%	626%	153%	141%	255%	187%	734%	121%		Number of treatments (columns)	10									Number of treatments (columns)	6
0	0		0	0	0		4.00019	0	5.71452														Number of values (total)	5587									Number of values (total)	2409
0	0	0	0		0	0		0	6.66728		Sum	215	77	180	77	2266	1022	816	2194	1247	799
0		0		0		0	3.33318	2.5001	0														Number of families	1									Number of families	1
0	0		0	0	0	3.33331	3.99992	0	1.66664														Number of comparisons per family	9									Number of comparisons per family	5
0	0	0	0	6.66604	0	0		0	3.33341														Alpha	0.01									Alpha	0.01
0	0	0	0	0		0	4.99982	0
0		0	0	0		0		0	0														Dunnett's multiple comparisons test	Mean Diff,	99,00% CI of diff,	Significant?	Summary	Adjusted P Value	A-?				Dunnett's multiple comparisons test	Mean Diff,	99,00% CI of diff,	Significant?	Summary	Adjusted P Value	E-?
0	0	0	0		0				0														Control vs. BUB-1	0.08943	-1,118 to 1,296	No	ns	0.9997	B	BUB-1			CLS-2 vs. CLS-2R970A	0.9237	-1,322 to 3,170	No	ns	0.6318	F	CLS-2R970A
0	0	0	0			0	20.0003	0	0														Control vs. HCP-1	-0.0219	-1,170 to 1,126	No	ns	>0,9999	C	HCP-1			CLS-2 vs. BUB-1+CLS-2	1.63	-0,5534 to 3,814	No	ns	0.094	G	BUB-1+CLS-2
0		0	0		0	5.00014	5.00015		2.5001														Control vs. BUB-1+HCP-1	0.08609	-1,130 to 1,303	No	ns	0.9997	D	BUB-1+HCP-1			CLS-2 vs. HCP-1+CLS-2	-3.353	-5,755 to -0,9506	Yes	****	<0,0001	H	HCP-1+CLS-2
0		0	0	6.66654	0	0	19.9983	0	5.71439														Control vs. CLS-2	-3.321	-4,544 to -2,097	Yes	****	<0,0001	E	CLS-2			CLS-2 vs. BUB-1+HCP-1+CLS-2	0.2337	-2,038 to 2,505	No	ns	0.9983	I	BUB-1+HCP-1+CLS-2
0	0	0	0	0	0	0	3.33342	6.66634															Control vs. CLS-2R970A	-2.397	-3,842 to -0,9521	Yes	****	<0,0001	F	CLS-2R970A			CLS-2 vs. BUB-1+HCP-1+CLS-2R970A	0.2487	-2,389 to 2,886	No	ns	0.9986	J	BUB-1+HCP-1+CLS-2R970A
0	0	0	0	3.3332	4.99995	0		0	4.99966														Control vs. BUB-1+CLS-2	-1.691	-3,088 to -0,2926	Yes	***	0.0008	G	BUB-1+CLS-2
0	0	0		4.99995	0		4.99992	0	6.66653														Control vs. HCP-1+CLS-2	-6.674	-8,236 to -5,111	Yes	****	<0,0001	H	HCP-1+CLS-2			Test details	Mean 1	Mean 2	Mean Diff,	SE of diff,	n1	n2	q	DF
0	0	0	0	10.0005		10	5.00031		2.5														Control vs. BUB-1+HCP-1+CLS-2	-3.087	-4,552 to -1,623	Yes	****	<0,0001	I	BUB-1+HCP-1+CLS-2			CLS-2 vs. CLS-2R970A	3.525	2.601	0.9237	0.7288	643	393	1.267	2403
0	0	13.3351	0	4.99978	0	9.99918	20.0004	0															Control vs. BUB-1+HCP-1+CLS-2R970A	-3.072	-4,809 to -1,335	Yes	****	<0,0001	J	BUB-1+HCP-1+CLS-2R970A			CLS-2 vs. BUB-1+CLS-2	3.525	1.894	1.63	0.7085	643	431	2.301	2403
0	0	0	0	9.99971	6.66641		16.0002																										CLS-2 vs. HCP-1+CLS-2	3.525	6.878	-3.353	0.7795	643	319	4.302	2403
0	0	0	0	5.00003	9.99991	0	13.333	0															Test details	Mean 1	Mean 2	Mean Diff,	SE of diff,	n1	n2	q	DF		CLS-2 vs. BUB-1+HCP-1+CLS-2	3.525	3.291	0.2337	0.7371	643	379	0.3171	2403
0	0		0		5.71409	0	9.99933	0	3.33345														Control vs. BUB-1	0.2039	0.1144	0.08943	0.3714	1054	672	0.2408	5577		CLS-2 vs. BUB-1+HCP-1+CLS-2R970A	3.525	3.276	0.2487	0.8558	643	244	0.2906	2403
0		0	0	10.0007	2.85718	0	6.66686		2.50003														Control vs. HCP-1	0.2039	0.2258	-0.0219	0.3532	1054	797	0.06202	5577
	0	0	0				59.9967	0	0														Control vs. BUB-1+HCP-1	0.2039	0.1178	0.08609	0.3744	1054	655	0.23	5577
0	0	0	0	20.0014	3.63644	0		7.99982	2.85715														Control vs. CLS-2	0.2039	3.525	-3.321	0.3765	1054	643	8.82	5577
0	0	0	0	4.99966	2.50009	10	9.99918	7.99972	2.85722														Control vs. CLS-2R970A	0.2039	2.601	-2.397	0.4447	1054	393	5.391	5577
0	3.63637		6.66653	6.66647	0	19.9964	2.85696	0	0														Control vs. BUB-1+CLS-2	0.2039	1.894	-1.691	0.4302	1054	431	3.93	5577
0	0	0		6.66646	0			2.85704	0														Control vs. HCP-1+CLS-2	0.2039	6.878	-6.674	0.4808	1054	319	13.88	5577
	0		0	10.0012	0	5.71443	4.00028	0															Control vs. BUB-1+HCP-1+CLS-2	0.2039	3.291	-3.087	0.4506	1054	379	6.851	5577
0		0	0			0	7.99978		0														Control vs. BUB-1+HCP-1+CLS-2R970A	0.2039	3.276	-3.072	0.5345	1054	244	5.747	5577
0	0	0	0	3.33345	4.00019	0	6.66677	2.50017	4.00003
0	0	0	2.85713	4.00006	3.33324	0	5.00015	0	0
0	0	0	0	4.99985	2.49998	0		0	0
0	0	0	0	0		0	13.3338
0	0	0	0	0	2.85697	0	13.333	8.0003	0
0	0	0	0		5		13.3322	2.85714
0	0	0	0		10.0005	0	4.99985	0	2.85702
0	0		0		0		5.00009		4.00019
0		0	0	10.0012		0	3.99999	0	4.00001
0	0	0	0	5.00014			6.66698	0	0
0	0	0	0	0	0	0		0	0
0			0		0	0			0
0	0	0	0	3.99968		0		0	0
		0	0	14.9985	3.99998	0
	0	0	0	6.66681	4.00017	0		2.1053	3.33328
0	1.99996	0	0	10.0005	0	0	4.44444	0	1.33334
0	0	0	0		4.44428	0	13.3328		2.00009
0	0	0	0			0	0	2.00003	6.66645
0	0	0		19.9983	0	2.49984		0	1.3333
0	0		6.66669			0	5.00015	3.33317	0
0	0	0		9.99918		4.99996	3.33337	4.00015	3.33323
0	0	0	0		2.2222	0		0	0
0	0		0	4.99995	4.99985	20.0021	13.3346	3.33331
0	0	0	0	10.0004		0		4.44464
0	0	0	0	6.66619			10.0011	1.81827	0
0	0	0	0	6.6664		6.66723	5.00001	1.24998	0
0	0		0	13.3337	2.5001	0	20.0009	1.99991	0
0	0	0	0	2.22224	2.85737	0	13.3329	0	0
0	0	0				3.33319	30.0039	2.00006	0
0	0	0	0	0	4.99958	0	4.99982	0	0
0		0	0	0	0	2.85709		0	0
0	0	0	0		4.44423	0		6.66692	0
0	0	0	0	10.0001	8.00108	0	2.5	10.0002	13.333
0	0		0		3.33346	0	0	1.25002
0	0		0			0	5.00002	0	4.44457
0	2.22224	0	0	6.66639	0	0		0
0	0	0	0	20.0004	0	6.66741	4.0001		0
0	0	0	0	0			0
0	0	0	0		0	0		0	0
0	0	0	0	0	0	0	3.33317	0	13.333
0	0	0	2.85714		0	0	13.334		6.66613
0	0	0	1.66667	5.00009	0	0			0
0	0		0	0	0	0			0
	0	0	0	0	0	0	10.0007	2.66677	1.81827
0	0	0	0		7.99975	0	20.0022	0	3.99988
	0	0			6.66672	0		0	0
0	0	0	0	4.99997	4.00009	0	0		2.85704
0	0	0	0	39.9928	4.00011	0	4.00009	0	0
0		0	0	0	0		3.63643	0	6.66679
0	0	0	0			0	6.66654		3.63653
0	0	0	0		0	0	6.6663	0	0
0	0		0		0		6.66604		1.81827
	0	0	0		4.99982	3.99989	3.99975	0	6.66608
0		0	0	0	3.3332	0	6.66723	0	0
0	0	2.22229	0	9.99998		0	10.0001	10.0001
0	0	0	0		4.0003	0	15.0003
0	0			0	1.8181			1.6667	5.00018
0	0	0	0	3.99994	6.66677	0		1.6667	0
0	1.81821		0			0	3.33341	0
	0	0	0		4.44423	0	3.33318	0
0	0	0	0		3.99988	0	5.00018	0	0
0	0	0	0	0	2.49994	0	4.44439	0	0
0	0	0	0	0	4.9995	10.0012		0	0
	0	0	0	4.99985	3.99988	0	10.0004
	4.00003	0	0		6.66686	0		0	1.99998
0		0	0	3.33337			3.33324	0	1.17648
0		3.33326	0	10.0002		0	10.0004
	0	0	0		2.85735	4.99954	20	3.99996	0
	0	0	0		2.49996	0	20.0023	8.00018	0
0	0		0	4.00009	2.2222	0		0	3.33344
0	0	0	0	0	6.66753			0	1.66667
			0			0	5.71409		3.33315
0	0	0	0				3.33336	1.33326	13.3322
0	0	0	0	3.3332	10.0006	0	10.0004	1.33337	1.33333
0	0	0	0		0	0	20.0008	0	0
	0	0		4.99985					1.99996
0	0	0	0	5.00026	2.85698	3.33306	6.66677	0
0	0	0	0			0		0	2.85702
0		0	0		4.00011	0		0	10.2913
0	0	0	0	6.66626	3.33317		0		2.00008
0	0		0	9.99918		0		1.53848
	0	0			0		20.6319	1.99998	4.99992
0	0	0	0	13.3332		0	2.50004	0	4.00011
0	0	0	0	20.0009	0	0		2.49988	2.85715
	0	0	0	0	0	0	0		7.98779
0	0	0	0			0	0	0	0
0	0		0		3.33315	0			0
0	0	0	0		2.49988	0		0
0	0	0	0		2.50001		0		0
0	0	0	0		5.00012	0	0	4.00032	0
0	0	0	0		2.22232	0	3.33345	0
0	0		0	12.0002		0	6.66696	0
3.33337	0	0	0			0	0	3.99991	2.50004
	0	0	0	0	0		0	1.99996
0	0	0	0	0	2.85698	0			4.00004
0	0	0	0	0	10.0005	0	0	2.22211
2.49996			0		7.99972			2.8573	0
0	0	0			6.66648	0	0	0	1.53842
0	0		0	13.3345	20.0005		0	0	10.0002
0	0	0	0	20.0003	8.00022	4.00006		0	0
0	0	0		5.00012		0	0	2.00007
0	0	0	0		1.8181	0		1.17647	13.3338
0	0	0	0			0	0	2.49988	5.80286
0		0		9.99933		0		1.81821	0
0	0	0	0		0		0	0
0	0	0	0		0	9.99918		0	0
0		0	0	43.844	3.33341	0	4.99952	1.33333	4.00006
0	0	0	0	6.66669	6.66608	0	4.99966	5.00008	0
0	0	0	0	10.0002			0		9.99978
0	0	0	0	0	0	0	4.99969	0	3.07684
0		0	0		0	0		0	0
0	0	0	0	0		0	0	0	2.49998
0	0	0	0	0	2.50009	0		0	2.49999
0	0		0	7.99975		9.9999	11.4287	10.0003	4.99953
0	0	0	0	0	0	0		0	3.99996
0	0	0	0	0	0	0	26.6661	9.99926	6.6676
0		0	0		2.85714	0	0	10.0005	8.00021
0	0	0	0	0	0	0	0	7.99978	9.99985
0	0	0		0	0		0	7.99992	13.3322
0	0	0	4.99995	0	0	0	0	4.00003	4.00009
0	0	0	0		0	0		5.00007	4.99992
0	0	0	0	10.0002	0		0	4.44427	1.53848
0			0	0	0	0	0		3.99995
0	0	0	0	7.99977	7.27286			0	2.85732
0	0	0	0	0	6.66662	4.99953	0	5.00015	0
0	0	0		0	0	0	0	3.33338	11.2248
0	0	0	0	0	0		0		6.66635
	0		0	6.66662		0	0	0	1.53848
0	0	0	0	4.99982	6.667			0	8.00063
0	0	0	0	0	6.66638	6.00022	6.66691		10.0009
	0	0	1.25003	0	0	6.66686	4.00032	3.33346	2.49998
0	0	3.33338	0		0				6.66681
0	0		0	0	4.99995	0	0	2.50003	4.44456
0	0	0	0	4.99999	0	0		5.7143	0
0	0	0	0		2.50013	0	0	10.0009	10.0001
0	0	0	0	7.49991	0	0	10.0015	3.99988	0
0	0	0	0		0	0	0	0	13.3329
0	0	0	0	2.85728	0	0		2.49999	0
0		0		0	0	0	0		0
0	5.00007	0	0	3.33341			6.6676		2.22226
0	0	0	0	0	0	2.22227		10.0001	1.66663
0	0	1.17642	0		3.33328		0	5.00031	2.8571
0	0	0	0	0		0		0	6.667
0	0	0	0	0		0		0	19.9998
0	0	0	0	4.44438	2.50001	8.00045	0	3.99995	2.22226
	0	0	0	5.00009	0		0	2.8571
0	0	0	0	0		0	0	0	7.99937
0	0		0	0	3.99996	0	10.0005	0	3.33331
0	0	2.22228	0	2.22211	0	0		4.99952	0
0	0	0	0	2	0		2.85726		5.00002
0	0	0	0	0	3.33363		0	0	4.00015
0	0	0		0	9.99936		0	0
0	0	0	0	0	0	0		0	1.99993
0	0	4.44438	0				6.6676		2.50008
0	0	0	0	0	2.8572	2.85718	0	10.001	3.99988
0	0	0	0	0	0	0		2.85713	2.8572
	0		0	0	0	0	4.99953	10.0002	0
0	0	0	0	0		0	6.66631	0	10.0002
0	0	0			6.66608	0	0	0	0
	0	0	0	0	2.8572	0			0
0	0	0	0	0	0		0	0	6.66604
0	0	0	0	0	5.00051	4.99985	1.8181	0	9.99993
0	0	0	0		0	0	10	4.99985
0	0	0	0	0		0	0	0	0
0		0	0		2.8572	0	0	4.00006	0
0	0	0	0	0	-20	0	0	1.99996	0
0	0	0	0		5.7144	0		0	3.33339
0	0	0	0	0	0	0	0	9.9999
0	0	0		0	0	5.00014	4.99995	0	0
0	0		0	0	0	20.0021		0	4.99996
0	0	0	0	7.99976			0	3.33331	5.00002
0	0	0	0		2.85696	0	3.33349	0	6.66661
0	0	0	0	1.99996	0	0	10.0006	0	4.99994
0	0	0	3.3332	0	3.33366	0	0	2.22225	13.3329
0	0	0	0		1.66657	0		3.33334	3.3332
0	0	0		2.85726	1.17643	6.66654	0	2.49999	0
	0	0	0		3.99982	0	3.33331		2.6666
0	0	0	0	0	0			0	5.00019
	0	0	0		0	0	4.0001	0	3.33339
0	0	0	0	0		0	0	2.8573	0
0	0		0	0	2.50018	0	0	0	8.57119
0	0	0		0	0	0	0	2.5001	13.3334
0	0		0	6.6664	3.99988	0	2.85732	0	11.4288
0	0	0	0	6.66698	0			0	2.85714
0	2.85707	0	0	0		0	8.00063	20.0021
0	0	0	0	0	0	0		0	6.6663
0	0	0	0		0	0	0	0	5.45473
0			0	0	0	0			0
0	0	0	0	0	0	0	0	1.3333	0
0	0	0	0	0	2.5001	0		3.33328	0
		0	0	8.00008	0		0		2.50004
0	0	0	0					1.81821	13.3322
0		0	0	2.8572	0	0	2.22227	0	0
0	0	0	0		0	10.0004	0	0	0
0	0	0	0		0	0	3.99965		0
0	0	0	0	2.85696	20.0014			1.66667	0
	0	0	0	0	9.99932	0	2.49997
0	0	0	0		0	0	0		0
0	0	0	0	2.8571	0	3.33319
0	0		0	0	0	0			0
0	0	0	0	4.44459	9.99933	0		2.85711	0
0	0	0	0	0		0	0	0	0
0	0	0	0	0	0	0		1.33334	0
0	0	0	0	10.0005	0	0	0	0
0	0	0	0	6.66681		5	0		0
0	0	0	4.99964		0	0	0	2.5001	5.00009
0	0		0	0	0	0		0	5.00046
0	0	0	0	1.6666	6.667		0	0	2.49997
0	0	0	0	0	6.66695			3.33341	0
0	0	0	0	6.66741		0	0	3.99996	0
0	0	0	0	6.66723		0	0	0	8.00012
0	0	0	0	0	0	0	0	5.00014	2.22215
0	0	0	0	0			0	0	0
	0		0	0	0	0	0	0	19.996
0	0	0	0	0	0	0	9.99887		0
0	0	0	0	0				1.53844
	0			3.63628	0	6.66604	2.22229		3.33329
0	0		0	0	0	5.7145		2.49991	5.00014
	0	0			0	4.44443	3.33364	3.33315
0	0	0	0	0	0	0	0	0	0
0	0	0	0		0	0	0	0	5.00007
0	0	0	0	0		0	0	2.85697	13.3332
0			0	0	0	0	0		0
0	0	0	0	0	0	2.50003	0		3.99998
0	0	0	0	0					3.63627
0			0	10.0002	0	0	0	0
0	0	0	0	2.50007	4.00011	0		6.66691	5.00012
	0	0	0			0	0	2.49988	4.99966
0	0	0	0	3.33334	1.42854	0		0	5.00009
0	0	0	0			0		0	1.53846
0	0	0	0	0	4.99989	0	1.24992	8.00008	2.8572
	0	0	0	0	2.22204	0	1.53845		13.3337
0	3.33323	0	0	0	2.85696	3.33336	2.22225	20.0004	5.00011
0	0	0	0	0	0	5.00046	126.044		14.9991
0	0	0	0	0	0	0	2.49991	0	4.99982
0	0	0		0		20.0021	4.00011	0	6.66608
0	0	0	0	5.00007	5.71418	3.33349	1.66672	0	0
0	0	0	0		2.50004		4.00004	0
0		0	0	0	4.00015	6.66696	2.85724	0
0	0	0	0		0	3.33323	2.22214	0
0	0	0	0	0		5.00011	10.0012	6.66677
0	0	0	0	0	0	4.99969		7.99995
0	0	6.66657	0	0	0		2.49979
0	0	3.33341	0			3.33333	0
0	0	0	0	0		0	6.66728	0
	0	0	0		1.8181	0	1.42851	3.33318
0	2.22229	0	0	2.22224		0		0
0	0	0	0	0	2.00005		6.66725
0	0	0	0	0	0	6.66672		0
0	0	0	0	4.99982	3.33311	0
0	0	0	0			0	0	0
0	0	0		0		0	0	0
0	0	0	0	0	1.66672	0	0
0	0	0	0		1.81817		0
0	0	0		0		0	0	5.00015
0	0	0	0	3.33337	9.99978	0		6.66728
0	0	0	0	1.81814		0		4.00028
0	0	0	0	0	3.63639		8.00045
0		0	0	2.50001	0	0	0	2.85713
0	0	0	0	0	0		7.99989	4.00022
0	0	0	0		0	0	0	3.9999
0	0	0	0			0	0	2.49999
0	0	0	0	7.99978	0	9.99842	59.9885	2.85727
0	0	0	0		0	2.22229		0
0	0	0	0			0	5.00007	7.99978
0	0	0	0	8.88933	2.49982	0	5
0	0	0	0	11.9996	10.0011	0	20.0001	2.49996
0	0	1.53842	0	4.00006	1.81813	0	4.99995	0
0	0	0	0		4.0001	0	0	0
0	0	0	0		0	0	5.0001	0
0	0	0	0
	0	0	0	3.33337	0	0	9.99926	0
0	0	0	0	0	0	0	9.9999	0
0	0	0		0	4.00016	0		10.0002
0	0		0	0	4.99998	4.99969		9.99978
0	0	0	0		3.07678	13.3339	13.3332	0
0	0	0	0	16.6673		0	6.66662	1.24996
0	0		0		0	0	2.8571	1.81816
0	0				0	0
0		0	0	2.49987	0		9.99937	0
	0	0	0	0		0	5.00011	4.99995
0	0	0	0		0	0	13.333	0.999971
0	0	0	0	0	0	0	10.0002	0
0	0	0	0	0		0	9.99972	1.99994
0	0	0	0	0	0	0	6.66669	0
0	0	0		3.07686		0	3.33338	0
0	0	0	0			0		0
	0	0	0	3.33319	1.42858		20.0004	0
0	0	0	0	0	4.99995			0
0	0	0	0	6.66673	0	6.66611
	0	0		1.66673	0	4.99923	5.00002	1.53845
0	0		0	0	0	3.33345	0	0
0	0	0	0	0	7.50017	0	10.0002	11.4292
0	0	0	0	0	0			9.99991
0	0	0	0	5.99989	3.33318	9.99895	10.0004	0
	0	0	0	0	3.33337	0	4.99985	3.33349
0	0	0	0		2.22226			6.66654
0	0		0				6.66662	0
0	0	0	0	0	0	6.66678	0
0	0	0			5.45454	20.0009		0
	0		0	7.9999		19.9987		0
0	0	0	0	9.99933	1.81819	4.99985	6.66654	467.863
0		0		0	4.99985		13.333	3.6363
	0		0	0		9.99975		0
1.99991	0		0	4.99995	0	6.66588	19.9986
0	0	0		0	5.00021	6.66698	10.0009	3.99975
0	0	0	0	1.81827	2.00002		6.66611	2.8571
0	0		0	0	4.4445	4.00005
0	0	0	1.53843	2.85724	0	2.00003	19.9964
0	0	0	0	3.33337	0	0	0	0
0	0		0	0		5.00054	2.85707	1.66659
	0		0	1.66666	3.33341	20.0005	0	4.00006
0	0	3.99995		0	0	0		0
2.22232	0	0	0	0	0		8.0003	2.22226
	0	0		2.22236	0	1.53853	19.9983	2.50009
0	0	0	0	0		0		0
0	0	0	0	6.66709	12.4996	4.00011	13.3335	0
0	0		0		2.1053	6.66699	9.99979
0	0	0	0	1.66671	4.00006	0	20.0004	0
0	0	0	0	6.66684	5.00012	0	7.99996
0	0	0	0	8.00012	0		10.0001	0
0	0		3.33338	4.99953	0	5.00051	6.66657	0
	0	0		0	6.667
0	0	0	0	6.6663	0	3.33304	13.3334	0
0	0	0	0	0		0	1.99999
0	0	0	0	19.9994	0		3.99979	2.22216
0	0		0		0	4.99995	6.6664	6.66657
0	0	1.33336	0	0	0	0	39.9986	2.22218
	0	0	0		1.53844		19.9966	0
0		0	0	1.99998	8.00029	2.49982	0	0
	0	0	0		0	0	2.8573	0
0	0	1.81816	0	0	13.3334			0
0	0	0	0		1.66665	0	1.81814	0
0	0		0	6.66698		0	4.00028	3.33323
0	0	0	0		3.99968	0	0
0	0	0	0	0	2.66657
0	0	0	0	6.66669	1.99998	3.99988	148.027	3.33317
0	0	0	0	3.99994	1.66672	3.07687		3.99989
0	0	0	0	0		3.07687	1.53849	0
0		0	0	15	1.6667	0		1.66667
0	0		0	4.99949	1.05265	0	10.0007	0
0	0	0	0	0		6.66613	5.00007	0
	0	0		0	0	0	2.50007	0
0	0	0	0	5.00009	0		2.85721	0
0	0	0	0		1.6667	4.4443	13.3335
	0		0	0	0	0	2.49997
0	0	0	0	10.0001		3.33331	5.00011	0
0	0			0	1.05262		13.3334	0
0	0	0	3.33336	0				0
			0	0	1.66673		5.00003	0
0	0	0		0	0	2.22214		0
0	0	1.8182	0	0	10.0001	0	5.7144	2.49995
0		0		0	4.00019		15.0003	0
0	0		0	0	0	6.66741		19.9983
0	0	0	0		4.00009	5.00009	2.00002
0	0	0	0	4.44434	6.66635	0	6.66661	0
0	0	0	0	1.1765	3.3333		0
0	0	0	0		3.63642	0	10.0012	0
	0	2.50007	0		6.66698		9.99971
0	0	0	0	0	0	0	15.9992	5.00002
	0	0	0		3.63639	0	5.00009	0
0			0	0	4.99992		4.00009	0
	0	0	0	0	0	2.85749		0.769215
0.95236	0	0	0		3.99993	0		1.66671
0	0	0	0	0	12.0006		6.66723	0
0		0	1.24995	13.3321	9.99917		0	10.0002
0	0	0		0		0	0	0
0	0	0	0	4.00054	0	0	6.66652	8.5718
0	0	0	0		5.00015		4.99995	3.33329
0	0	0	0		0	0	10.0009	0
0	0	0	0	2.85726	1.5385	0	4.00009	3.33329
2.00004	0	0	0	0	0		4.99985	1.53841
0	0	0		0	0		1.99996	0
0	0	0	0			0		0
5.00012	0	0	0	9.99885	1.53842	0	4.99996	0
	0	0	0		1.42855
0	0	0	0		1.42857	0	10.0001
0	0		0		0	0		0
		0	0	6.66648	2.85718		7.99998	0
0	0	0				0	10.0013
	0	0	0	20.0008	9.99985	9.99995
	0				0			0
0	0	0	0	0	0	0	10.0001	0
0	0	0	0	19.9961	2.49999		26.6661	2.85714
0	0		0		2.22222		0
0	0	0	0	2.13071		0	3.33333	0
	0	0	0	5.00019	0		8.00022	0
0	0	0	0	2.49984	3.33326	0
	0	0	0	0	0	0	4.00006	3.63627
0	0	0	0	6.66673	10.0002	0	9.99965	1.42859
0	0		0		10	0	8.57141	1.99996
0	0	0	0		9.99997	0	26.6668	3.33325
0		0			10.0007		3.99968	2.22226
0	1.17645	0	0	6.66665	3.33337	2.00004	0	0
2.5001	0	0						1.6667
0	0	0	0	6.66669	2.8572	3.33335		0
0	0		0		1.53842	0		1.33335
0	0	0	0	19.9987	2.50004	0		2.50003
0	0	0			6.66669	9.99917		2.00008
	0	0	0	6.66641	0	0
0	0	0		0	10	0		1.66666
0	0	0	0		8.00038	0
0	0	0	0	9.99917	0	4.00011		2.85713
0	0	0	0		2.85722	2.85702		3.3335
0		0	0		2.49998	3.99989		0
0	0	0		20.0028	0	1.6667		0
0	0	0	0	0	4.44464	0		0
0		0	0	0	0	0
0	0	0	0	10.0004	7.99982	1.66661		0
0	0	0	0	19.9956	1.3333	2.85715		0
0	0	0	0	5.00026	0	2.22241
0	0		0	4.44471	0	2		1.81817
	0	0	0	0
0	0	0	0		0			2.50009
0	0	0	0	7.99937	0	2.22211		0
0	0	0	0			4.00026		0
0	0	0	0	1.99996	1.6667	4.00025		20.0021
	0	0	0	26.6659	2.353			10.0002
0	0	0	0	4.44463	9.99985
	0		0	9.99919	19.9996	1.24993		0
0	0	0	0	4.99963	1.11109
0		0	0	1.11107	3.99999	-19.9993		6.6664
	0	0	0		5.00007	6.6676		0
0	0	0	0		1.33336	0
0	0	0	0	30.0021	2.22222	0
0	0	0	0	1.81816	0
0	0	0	0	1.42857	1.42859	0
0		0	0	5	0
4.44472	0	0			2.49988	1.53851
0	0	0	0	3.3332	20.0001
0	0	3.33336	0	0	2.5001	0
0	0	0	0	0	1.1111	0
0	0	0	0			0
0	0	0	0	13.3322	0	0
0	0	0	0	6.66657	0	0
0	0	0	0	0	0	0
0	0		0		7.49996	0
0	0	0	0		0	0
0			0	0	0	0
0	0	0	0			0
	0		0	0	1.6667
0	0	0	0	0	2.2223
0	0	0	0		0.689636	0
0	0	0	0	1.66677	3.99989	0
0	0	0	0		4.99999	1.8181
	3.63634	0	0	0		5
0	0	0	0	3.99968		0
0	0	0
0	0	0	0	3.33324		20.0021
10.0001	0	0	0			4.00011
0	0	0	0
0	0	0	0	0		0
0	0		0	0		0
0	0	0	0	0		0
0	0	0	0			2.85723
0	0	0	0	0		6.66753
0	0	0		3.99968		59.9891
0	0		0	0
0	0	0	0	0
	0	0	0	5.00031
0	0	0	0	0
0	0	0	0	0		10.0005
0			0			0
0	0	0	0	0		0
0	0	0	0			0
	0	0	0	0		19.9995
0			0	2.49991		0
0	0	0	0	2.22233		0
0	0	0	0	0		0
0	0	0	0	0		0
0	0		0			0
0	0	0	0	3.3335
0	0	0	0	0		3.33349
0	0	0	0	0		5
0	0	3.33339	0
0	0	0		6.6676
0	9.99901		0	0		2.49995
0	0	0	0	6.66652		0
0	0	0	0			0
0	0		0	0		2.2222
	0	0	0	0
0	0	0	0			0
0	0	0		5.00002		0
0	0		0	10.0002		4.00008
	0	0	0			0
0	6.66652	0	0	2.22236		0
0	0	0
0	0	0	0	2.85726		0
0	0	0	0	2.50008
0	0	0	0			7.49924
	0	0	0	2.85698
0	0	0	0	2.85705		2.85732
0	0	0	0	0		0
	0	0	0	1.81821		0
0	0	0	0	0		0
0	0	0	0	4.4446		0
0	0	0	0	0
0	0	0	0	0
0	0	0		4.99958		0.714286
0	0	0	0			0
0	0	0	0	5		10
0	0		0	2.50009		0
0	0	0	0	2.4998		0
0	0	0	0	1.81815
0			0
0	0	0	0	4.00032
0	0			4.99985
0		0	0
0	0	0	0	3.99989
	0	0	0	3.99988
0	0		5.00002	0
0	0	0	0	0
	0	0	0	3.3332
0	0	0	0	0
0	0	0	0	0
	0		0
10.0002		0	0	2.00008
20.0706	0	0	0	5.00046
21.9618	0			0
0	0	1.81827	0	0
	0		0
0	0	0	0	0
0	0	0	0	0
0	0	0	0	1.81828
0	0	0	6.66645	1.66661
0	0		0
0	0	2.22228	0
0	0	0	0	0
0		0	0	3.9997
0	0	0
0	0	0	0	6.66741
0		0	0	2.50001
0	0	0	0	10.0002
0		0	0
	0	0	0	3.33321
0	0	0	0	8.00051
	0	0	8.00054
0	0	0	0
0	0		0	6.66623
0	0	0	0	3.6362
0		0	0
0	0	0		3.3332
0	0	0	0	5.71405
0	0	0	0	4.00011
0	0	0	0	3.07689
0	0	1.99996	0	5.00031
0	0	0	0	0
	0	6.66753	0	10.0001
0		0	0	6.66676
0	0	0	0	4.44423
0	0	0		2.85736
		0	1.53845	19.9989
	0	0	0	2.50001
1.42864	0		0	5.00009
0	0	0	0
0	0	0	0
0	0	0	0	0
0	0	0	0
	0	0	0	20.0039
0	0	0	0
0	0			0
0	0	0	0	5.00046
0	0	0	0	0
	0	0	0	2.00003
0	0	0	0	0
0				3.33321
0	0	0	0	0
0			0	3.33362
	0	1.81816	0	2
0		0	0	1.81819
	0		0	2.50008
0		0		3.3332
0	0	0	0	1.81818
0	0		0
0	0	0	0	5.00014
0	0	0	0	2.22241
0	0	0	0	4.00026
	4.99982	0
0	0		0
0	0	3.99979	0	4.00025
0	0	2.50001	0
0	0	0	0	0
0	0	0	0
0	0	0	0	0
0	0	0	0	0
0	0	0	0	0
0	0	0	0	0
0	0	0	2.50009
0	0	0	0	1.66661
0		0	0	6.00009
0	0	0	0	9.9997
0	0	0	0	0
0	0	0	0	0
0	0	0		0
0		0	0	1.6666
0	0	0	0	0
		0	0
0	0	0		1.81815
0	0	0	0	3.99989
0	0	0	0	2.00014
0		0	0	1.6667
0	0		0	19.9977
0	0	0	0
0	0	0	0	2.66677
	0	0	0	4.99989
3.33357	9.99985		0	0
0	0	1.66663	0	0
0	0	0	0	0
0	0	0		0
0	0	0	0	0
0	0	0	0	0
6.66723		2.85724	0	0
0	0	0	0	0
0		0	2.50009
0	0	1.90474	0	0
0	0	0
0	0	3.33336	0	0
0	0	0	0
0	0	0		1.99998
	0	0	0	18.9699
0		0	0	0
0	0	0	0	0
0	3.33326	5.00015	0
0	0		0	1.42859
0		0	0	2.4998
	0	0	0	2.22204
0	0
0	0	0		5.0002
0	0	0	0	9.99917
0		0	0
0	0		0	0
0	0	0	0	8.00008
		0	0	2.50009
0	0	0	0	2.5001
0	0
0	0	0	0
0	0	0	0	5.00018
0		0		0
0	0	2.5001	0	0
0		0	0
0	0	0	0	5.00003
0	0	0	0	2.22219
0	0	0	0	5.00009
0	0	0		0
0		0	0	5
0	0	0	0	3.63636
0	0	0	0	4.99966
		0	0	6.66652
0	0	0	0
0	0	0	0	2.85698
0	0	0	0	1.17648
0	0	0	0	0
	0	0	0	2.49987
0	0	0	0	1.8182
0	0	0	0	0
0	0		0	0
0	0	0	0	1.17642
0	0	0	0	2.49998
0	0
0	0	0	0	1.42851
0	0	0	0
0	0		0	1.53843
0		0	0	0
0	0		0	0
0		2.50001	0	1.81824
	0	0	0	0
0	0	0	0	0
0	0	0	0
0	0	0	0	1.81827
	0	0	0
0	0	0	0
0	0	0	0	19.9997
0		0	0	3.33333
0	0	0	0	5.00002
0	0	0	0
0	0	0	0	0
0	0	0	0	3.33337
0	0	0	0
0	0	0	0	0
0	0	0	0	4.0001
	0	0		1.6667
0	0	0		19.9983
0		0		0
0	0	0		0
	9.9999	0
0	0			3.99998
0		0		2.50002
0	0	0		0
0	0	0		0
0	0	0		4.00015
0		0		0
0	0	0		0
0		0		2.50004
0	0			2.85719
0	0	0		3.63624
0	0	0		0
0	0	0		6.66644
0		0
0	0	0		5.7143
0	0	0		4.61531
0	0	0		4.99995
0	0	0		0
0	0	0		0
0	0	0		0
0	0	0
0	0	0		0
0	0	0		0
0	0	0
	0			0
0	0	0
1.42853		0		0
				0
0		1.33339		20.0032
0		0
0		0		3.63633
0		0		0
0		0		0
1.99993		0
0		0		0
		1.66662		2.5
0		1.25001
0				0
0		0
0		0		3.6365
0		0		5.00014
0		0		3.99991
0		0		3.33317
0		3.33362		9.99937
0		0
0		0		0
0		0		10.0004
0				0
0		0		6.66638
0		0		4.00003
0		0		10.0002
0		0		0
0
0		0		0
0		0		0
0		0
0		0		0
0		0		0
0		0		0
0		0		2.00001
0		0
0		0		10.0002
		0		2.00003
0		0		0
2.49996		0		5.00009
		0		0
0		0		0
0		0		0
0		0		0
0		0		0
0		0
0		0		10.0002
0		0
0		0		0
				13.3334
0		0		10.0009
0		0		0
0		0
0		1.99999		19.9989
0		0
0		0		0
0		0
6.66648				0
0		0		0
0		6.66698		20.0005
0		0		8.88888
0
2.49998		0		2.49993
0				0
0		0		0
		0		3.99986
0		0		0
0		0		0
0		0
0		0		0
0		0		10
0		0		20
0				3.33318
0		0
0		0		0
0		0
0				6.66645
0		0		0
0		0		2.50008
4.0001		0		3.33346
0		10.0002		0
0		0		5.71439
0		0		3.33336
5.7145
1.53841		0		8.00008
0		0		0
4.99985				0
		0		0
0		0		0
0		0
0		2.85736		0
0		0		0
0		0
0		0		13.3337
0				0
0		0		0
0		6.66708		0
0		0
0		2.49994		0
0		0		3.33338
0		0		0
29.9975				0
0		2.00009		0
0		0		0
0		0		0
0		0
0				0
0		0		0
0		0		0
0		0		1.99996
0		0		0
0		0		4.00027
0				6.66608
0		0
0		0		6.66681
0		0
0		0
0		0
0		0
0		0
		0
0
0		0
0		0
0		0
0		0
0		0
0
0		0
0		0
0		0
0
0		0
0
0		0
0		0
0
		2.49996
0		0
2.10525		0
		20.0032
0		0
0		4.99985
		0
0		0
0		0
0		0.909113
0		0
0		0
0		0
0		0
0
		0
0		0
1.42852		0
0		0
0		0
0		2.22246
0		0
0		0
0
0		0
0		0
0		0
0		0
0		5.00002
		0
0		0
2.50003		0
0
0
0		2.50002
2.49997		0.999993
1.17647
0
0
0
0
0
0
0
0
0
0
0
0
1.25003
0
0
0
0
0
0
0
0
0
0
0
0
0
0
0
0
0
0
0
0
0
0
0
0
0
0
0
0
0
0
0
0
0
0
0
0
0
0
0
0
0
0
0
0
0
0
0
0
0
5.55554
0
2.22226
0
0
0
0
0
0
0
0
0
0
0
0
0
0
0
0
3.63623
0
0
0
0
5.45464
1.25
0
0
0
0
1.66662
0
0
0
0
0
0
0
0
0
0
0
0
0
0
0
0
0
0
0
0
0
0
0
0
0
0
0
0
0
0
0
0
0
0
0
0
0
0
0
0
0
10.0001
0
0
0
0
0
0
0
0
0
0
0
0
0
0
0
0
0
0
0
0
0
0
0
0
0
0
0
0
0
0
0
0
0
0
0
2.49994
0
0
0
0
0
0
0
0
0
0
0
0
0
0
0
0
0
0
0
0
1.99991
2.22224
0
0
0
0
0
0
0
1.66661
0
0
0
0
0
0
0
0
0
0
0
1.53845
2.22229
0
0
0
0
0
0
0
0
0
0
2.22229
0
0

## Sheet: Pause
Percent time spent in pause
Control	BUB-1	HCP-1	BUB-1+HCP-1	CLS-2	CLS-2R970A	BUB-1+CLS-2	HCP-1+CLS-2	BUB-1+HCP-1+CLS-2	BUB-1+HCP-1+CLS-2R970A		Descriptive statistics	Control	BUB-1	HCP-1	BUB-1+HCP-1	CLS-2	CLS-2R970A	BUB-1+CLS-2	HCP-1+CLS-2	BUB-1+HCP-1+CLS-2	BUB-1+HCP-1+CLS-2R970A		ANOVA summary Group 1									ANOVA summary Group 2									Unpaired t-test
	0	0	0			0	5.24934		0		Number of values	1192	763	935	732	885	497	559	446	478	290		F	134.1								F	104.5								Table Analyzed	%time in pause per MT
	0	0	0			0	0		13.0435														P value	<0,0001								P value	<0,0001
0	0	0	0	0	3.02267	0	0	0	0		Minimum	0	0	0	0	0	0	0	0	0	0		P value summary	****								P value summary	****								Column J	BUB-1+HCP-1+CLS-2R970A
0	0	0	0	0	0	0	0	0	0		25% Percentile	0	0	0	0	0	0	0	0	0	0		Significant diff. among means (P < 0.05)?	Yes								Significant diff. among means (P < 0.05)?	Yes								vs.	vs,
0	0	0	0	0	4.50928	0	0	1.14942	13.4329		Median	0	0	0	0	0	0	0	0	10	0		R squared	0.1513								R squared	0.1423								Column I	BUB-1+HCP-1+CLS-2
0	0	0	10.8974	15.6862	3.65535	0	0	23.5713	0		75% Percentile	0	0	0	0	0	0	0	0	16	6.4
0	0	0	0	7.91141	0	0	0	0	25.0002		Maximum	202	27	47	83	197	74	54	46	97	61		Brown-Forsythe test									Brown-Forsythe test									Unpaired t test
0	0	0	0	4.26667	0	0	15.9722	31.7973	8.86076		Range	202	27	47	83	197	74	54	46	97	61		F (DFn, DFd)	84,64 (9, 6767)								F (DFn, DFd)	59,84 (5, 3149)								P value	<0,0001
0	0	0	0	2.11082	6.97673	0	0	11.3637	0														P value	<0,0001								P value	<0,0001								P value summary	****
0	0	0	0	0	0	0	0	14.4068	10.7345		10% Percentile	0	0	0	0	0	0	0	0	0	0		P value summary	****								P value summary	****								Significantly different (P < 0.01)?	Yes
0	0	37.975	0	0	0	0	0	24.0641	10.4895		90% Percentile	0	0	0	0	8.5	5.7	4.9	6.5	26	11		Are SDs significantly different (P < 0.05)?	Yes								Are SDs significantly different (P < 0.05)?	Yes								One- or two-tailed P value?	Two-tailed
7.51174	0	28.7035	0	0	6.18555	0	0	32.6533	0																																t, df	t=8,723, df=766
0	0	0	0	0	0	0	0	4.71014	0		95% CI of median												Bartlett's test									Bartlett's test
0	0	0	0	0	0	54.1662	0	31.8878	27.8845		Actual confidence level	95%	96%	95%	96%	96%	95%	96%	96%	95%	96%		Bartlett's statistic (corrected)	4175								Bartlett's statistic (corrected)	1081								How big is the difference?
0	0	0	0	0	0	0	0	13.1106	0		Lower confidence limit	0	0	0	0	0	0	0	0	9.3	0		P value	<0,0001								P value	<0,0001								Mean of column I	12.3
0	0	36.6195	12.7907	0	0	0	0	0	8.55262		Upper confidence limit	0	0	0	0	0	0	0	0	11	3.4		P value summary	****								P value summary	****								Mean of column J	4.503
0	0	0	0	18.6046	17.3334	26.3636	0	11.9171	5.00002														Are SDs significantly different (P < 0.05)?	Yes								Are SDs significantly different (P < 0.05)?	Yes								Difference between means (J - I) ± SEM	-7,797 ± 0,8938
0	0	0	0	0	14	0	0	12.2807	7.94705		Mean	0.56	0.1	0.75	0.75	3.1	1.5	1.5	1.7	12	4.5																				99% confidence interval	-10,11 to -5,489
0	0	0	0	0	0	0	0	0	9.40589		Std. Deviation	6.8	1.1	4.3	4.4	11	4.7	5.5	4.8	14	7.9		ANOVA table	SS	DF	MS	F (DFn, DFd)	P value				ANOVA table	SS	DF	MS	F (DFn, DFd)	P value				R squared (eta squared)	0.09037
0	0	0	0	0	0	0	0	0	0		Std. Error of Mean	0.2	0.041	0.14	0.16	0.37	0.21	0.23	0.23	0.64	0.47		Treatment (between columns)	61624	9	6847	F (9, 6767) = 134,1	P<0,0001				Treatment (between columns)	42771	5	8554	F (5, 3149) = 104,5	P<0,0001
0	0	0.724631	0	0	0	0	0	17.193	0														Residual (within columns)	345617	6767	51.07						Residual (within columns)	257703	3149	81.84						F test to compare variances
0	0	0	0	0	0	0	0	15.7534	0		Lower 95% CI of mean	0.17	0.022	0.47	0.43	2.3	1.1	1	1.3	11	3.6		Total	407240	6776							Total	300474	3154							F, DFn, Dfd	3,070, 477, 289
0	0	0	0	6.04395	0	0	0	0	8.33331		Upper 95% CI of mean	0.94	0.18	1	1.1	3.8	1.9	1.9	2.1	14	5.4																				P value	<0,0001
0	0	0	0	0	7.77479	0	0	0	0														Data summary									Data summary									P value summary	****
0	0	29.4796	0	0	5.80476	0	0	0	0		Coefficient of variation	1228%	1106%	580%	584%	364%	313%	370%	280%	113%	176%		Number of treatments (columns)	10								Number of treatments (columns)	6								Significantly different (P < 0.01)?	Yes
0	0	0	0	0	0	0	0	0	4.93152														Number of values (total)	6777								Number of values (total)	3155
0	0	0	0	14.9485	0	0	0	0	3.61758		Sum	662	78	698	549	2705	746	825	757	5880	1306																				Data analyzed
0	0	0	0	6.45162	0	0	0	8.72487	0														Number of families	1								Number of families	1								Sample size, column I	478
0	0	0	0	7.12435	0	5.37191	0	12.8713	9.92364														Number of comparisons per family	9								Number of comparisons per family	5								Sample size, column J	290
0	2.22223	0	0	0	0	0	0	12.963	0														Alpha	0.01								Alpha	0.01
0	0	0	0	0	0	0	0	16.5803	9.55849
0	0	0	0	17.4419	0	2.12767	0	0	7.32759														Dunnett's multiple comparisons test	Mean Diff,	99,00% CI of diff,	Significant?	Summary	Adjusted P Value	A-?			Dunnett's multiple comparisons test	Mean Diff,	99,00% CI of diff,	Significant?	Summary	Adjusted P Value	E-?
0	0	0	0	59.1551	0.446427	0	0	13.3721	38.5421														Control vs. BUB-1	0.4537	-0,6222 to 1,530	No	ns	0.7478	B	BUB-1		CLS-2 vs. CLS-2R970A	1.554	-0,008827 to 3,117	No	*	0.0106	F	CLS-2R970A
0	0	0	0	0	0	0	0	10.4575	6.5217														Control vs. HCP-1	-0.1915	-1,205 to 0,8223	No	ns	0.9968	C	HCP-1		CLS-2 vs. BUB-1+CLS-2	1.581	0,07418 to 3,087	Yes	**	0.006	G	BUB-1+CLS-2
0	0	0	0	0	7.46666	0	0	0	5.20834														Control vs. BUB-1+HCP-1	-0.1943	-1,284 to 0,8954	No	ns	0.9971	D	BUB-1+HCP-1		CLS-2 vs. HCP-1+CLS-2	1.358	-0,2616 to 2,977	No	*	0.0451	H	HCP-1+CLS-2
0	0	0.483092	0	0	6.35838	0	0	7.17947	0														Control vs. CLS-2	-2.501	-3,530 to -1,471	Yes	****	<0,0001	E	CLS-2		CLS-2 vs. BUB-1+HCP-1+CLS-2	-9.244	-10,83 to -7,662	Yes	****	<0,0001	I	BUB-1+HCP-1+CLS-2
0	0	0	0	0	6.97586	21.2119	0	16.9643	0														Control vs. CLS-2R970A	-0.9464	-2,186 to 0,2927	No	ns	0.0994	F	CLS-2R970A		CLS-2 vs. BUB-1+HCP-1+CLS-2R970A	-1.447	-3,334 to 0,4394	No	ns	0.0808	J	BUB-1+HCP-1+CLS-2R970A
0	0	0	0	0	0.255667	0	0	14.4	6.36943														Control vs. BUB-1+CLS-2	-0.9199	-2,110 to 0,2697	No	ns	0.0918	G	BUB-1+CLS-2
0	0	0	0	0	4.62725	0	0	8.05085	0														Control vs. HCP-1+CLS-2	-1.143	-2,431 to 0,1452	No	*	0.0325	H	HCP-1+CLS-2		Test details	Mean 1	Mean 2	Mean Diff,	SE of diff,	n1	n2	q	DF
0	0	0	0	6.86567	0	0	0	91.1766	10.8108														Control vs. BUB-1+HCP-1+CLS-2	-11.74	-13,00 to -10,49	Yes	****	<0,0001	I	BUB-1+HCP-1+CLS-2		CLS-2 vs. CLS-2R970A	3.056	1.502	1.554	0.5071	885	497	3.065	3149
0	0	0	0	0	0	0	0	0	0														Control vs. BUB-1+HCP-1+CLS-2R970A	-3.948	-5,467 to -2,428	Yes	****	<0,0001	J	BUB-1+HCP-1+CLS-2R970A		CLS-2 vs. BUB-1+CLS-2	3.056	1.475	1.581	0.4887	885	559	3.234	3149
0	0	0	0	9.00078	0	0	0	15.7481	6.79348																							CLS-2 vs. HCP-1+CLS-2	3.056	1.698	1.358	0.5253	885	446	2.584	3149
0	0	0	0	0	0	0	0	0	0														Test details	Mean 1	Mean 2	Mean Diff,	SE of diff,	n1	n2	q	DF	CLS-2 vs. BUB-1+HCP-1+CLS-2	3.056	12.3	-9.244	0.5135	885	478	18	3149
0	0	0	0	0	3.88601	0	0	9.83613	6.42202														Control vs. BUB-1	0.5554	0.1017	0.4537	0.3313	1192	763	1.369	6767	CLS-2 vs. BUB-1+HCP-1+CLS-2R970A	3.056	4.503	-1.447	0.6121	885	290	2.364	3149
0	0	0	0	0	0	0	0	0	0.485437														Control vs. HCP-1	0.5554	0.747	-0.1915	0.3122	1192	935	0.6134	6767
0	0	0	0	0	0	0	0	0	0														Control vs. BUB-1+HCP-1	0.5554	0.7498	-0.1943	0.3356	1192	732	0.5791	6767
0	0	0	0	7.71277	5.30302	0	0	13.1868	5.48523														Control vs. CLS-2	0.5554	3.056	-2.501	0.3171	1192	885	7.886	6767
0	0	0	0	0	0	0	0	10.6952	9.40767														Control vs. CLS-2R970A	0.5554	1.502	-0.9464	0.3816	1192	497	2.48	6767
0	0	0	0	12.1212	0	0	0	9.23078	0														Control vs. BUB-1+CLS-2	0.5554	1.475	-0.9199	0.3664	1192	559	2.511	6767
0	0	0	0	8.31167	0	7.6142	0	12.5641	0														Control vs. HCP-1+CLS-2	0.5554	1.698	-1.143	0.3967	1192	446	2.881	6767
0	0	0	0	9.44882	0	0	5.48303	0	0														Control vs. BUB-1+HCP-1+CLS-2	0.5554	12.3	-11.74	0.3869	1192	478	30.36	6767
0	0	0	0	0	0	0	0	11.1111	7.74648														Control vs. BUB-1+HCP-1+CLS-2R970A	0.5554	4.503	-3.948	0.4679	1192	290	8.437	6767
0	0	0	0	0	0	0	11.282	0	0
0	0	0	0	0	0	0	9.48276	13.0921	7.11865
0	0	0	0	11.2149	0	0	0	15.9794	14.7239
0	0	0	0	0	0	0	6.51042	0	0
0	0	0	0	41.3979	7.8167	0	0	6.36363	0
0	0	0	0	0	0	0	11.5681	0	0
0	0	0	0	22.8571	0	0	0	12.6263	0.252525
7.85712	0	0	0	0	8.63874	0	0	0	7.10527
0	0	0	0	0	0	4.40251	6.59898	0	6.9307
1.9802	0	0	0	0	0	14.3885	2.11082	0	7.01753
0	0	0	0	0	0	0	0	0	8.88884
0	0	0	0	0	0	7.95847	0	17.2185	0
0	0	0	0	0	10.6509	0	2.6455	0	0
0	0	0	0	18.75	0	0	0	15.2174	9.39949
0	1.11112	46.774	0	7.93649	0	0	6.60919	0	18.254
0	0	0	0	0	0	0	2.87206	0	0
0	0	0	0	19.1919	15.6171	0	0	16.707	0
42.3075	0	0	1.40846	0	0	0	0	0	3.67232
0	0	0	0	0	4.19947	0	0	0	0
0	0	0	8.11969	16.4456	0	0.371748	0	7.91788	0
0	0	0	0	17.7719	0	0	0	28.2777	5.4945
0	0	0	0	12.1771	0	0	0	29.3232	0
0	0	0	0	10.4987	0	0	5.42007	16.2963	0
0	0	2.0833	1.44929	0	0	0	0	0	0
0	0	0	0	31.4048	0	0	0	0	12.5
0	0	0	0	0	0	0	0	3.75	0
0	0	0	0	0	0	0	0	0	0
0	0	0	0	7.9646	0	0	0	0	8.98876
0	0	0	0	0	0	5.82822	0	5.99999	0
0	0	0	0	0	0	0	4.19947	50.8773	0
0	0	0	0	0	6.30137	5.11363	3.14135	18.7117	0
0	0	0.247525	0	29.9998	0	0	0	0	0
0	0.722022	0	0	0	0	0	4.55697	11.6071	10.2564
0	0	0	0	0	0	0	0	7.08448	6.89653
0	0	0	0	0	0	0	0	0	0
0	0	0	0	10.4	0	0	6.77968	13.6646	0
0	0	0	0	0	0	0	0	0	8.59105
0	0	0	0	0	0	0	29.2612	0	21.0528
0	0	0	0	0	0	0	0	15.9421	0
0	0	0	0	0	0	0	0	10.5454	2.91261
0	0	0	0	8.53661	0	0	0	0	6.36605
0	0	0	0	0	0	0	0	0	0
0	0	0	0	0	0	0	0	9.34582	0
0	0	0	0	0	0	0	0	0	12.3763
0	0	0	0	0	0	0	8.69566	0	0
	0	0	0	0.689441	0	0	0	6.53267	12.844
0	0	0	0	0	0	0	0	0	9.91736
0	0	0	0	0	0	0	0	0	0
0	0	0	0	3.87409	11.5702	9.27154	0	0	15.1685
31.5218	0	0	0	3	6.61375	0	0	0	9.84456
0	0	0	0	31.6883	0	0	0	0	34.6666
0	0	0	0	0	0	0	0	0	6.80853
0	0	0	0	0	0	0	0	7.97342	0
0	0	0	0	0	0	0	0	0	0
27.143	0	0	0	0	10.7417	0	0	12.5641	30.7691
0	0	0	1.61291	0	0	0	0	0	3.09859
0	0	0	0	0	0	0	0	0	2.84974
0	0	0	0	7.01754	0	0	0	0	0
30.8868	0	0	0	0	0	0	0	12.6984	0
0	0	0	0	0	8.15047	0	0	0	4.85175
0	0	0	0	0	0	0	0	3.63637	0
0	0	0	0	0	0	0	3.77358	0	0
0	0	0	8.8106	0	5.34759	0	0	0	0
0	0	0	0	0	0	0	0	0	5.97015
0	0	0.990095	83.0985	3.62117	0	0	0	0	6.59341
0	0	0	13.6363	0.280112	0	0	5.30504	0	0
0	0	0	0	0	0	0	0	0	0
0	0	0	0	7.60869	0	0	6.4935	19.5652	9.03954
0	0	0	0	9.76254	0	0	0	0	0
0	0	0	0	0	5.10752	0	0	0	4.72223
0	1.72414	0	0	22.2223	0	0	0	6.91489	5.56961
0	0	0	0	0	0	0	0	12.4029	4.41558
0	0	0	0	0	0	0	0	9.01638	6.91488
0	0	0	0	0	0	0	0	6.31315	0
0	0	0	0	22.1354	0	0	0	14.8485	4.8
0	0	0	0	7.18084	0	0	0	10.8573	0
0	0	0	0	0	0	0	5.04202	0	0
0	0	0	0	0	10.5727	0	0	0	0
0	0	0	0	0	0	0		8.80681	0.377439
0	0	0	0	0	8.11966	0		9.11765	0
0	0	0	0	10.8466	0	0	0	40.5662	4.98688
0	0	0	18.919	0	0	0	0	12.0968	3.98936
0	0	0	0	6.31579	0	8.81059	0	6.86017	4.65117
0	0	0	0	0	0	0	0	26.7443	0
0	0	0	0	0	0	0	11.3043	6.13719	4.02681
0	0	0	0	0	0	35.2944	0	11.3093	0
0	0	0	0	0	0	0	0.416666	8.42108	0
0	0	0	0	0	0	0	0	0	0
0	0	0	0	0	0	0	0	0	0
0	0	0	0	0	0	0	0	22.619	0
0	0	0	0	0	0	0	0	8.08823	0
0	0	0	0	0	0	0	0	29.6392	0
0	0	0	0	0	5.41237	0	0	19.2467	2.77778
0	0	0	0	7.31707	0	8.13951	0	18.9655	0
0	0	0	0	0	0	0	0	12.2677	0
0	0	0	0	0	0	0	0	11.6041	0
0	0	0	0	0	7.76397	26.4706	0	0	37.1794
0	0	0	0	0	0	0	0	12.0253	8.20668
0	0	0	0	0	0	0	0	22.3351	0
0	0	0.95238	0	0	0	0	0	16.6668	23.8095
0	0	0	17.2249	0	0	0	0	18.6722	10.6667
0	0	0	0	0	0	0	0	9.54356	0
0	0	0	0	0	0	0	0	5.37091	8.30205
0	0	0	0	0	5.35714	0	0	8.74634	0
0	0	0	0	11.6848	0	5.79711	0	8.82352	0
0	0	0	0	0	0	0	0	0	0
0	0	0	0	0	0	0	0	0	4.48262
0	0	0	0	5.41311	0	0	0
0	0	0	0	14.113	0	0	0
0	0	0	0	0	0	0	0		0
0	0	0	0	0		0	0	13.0841	36.2074
0	0	0	0	0		0	0	10.2439	0
0	0	0	0		0	0	0	11.3536	14.2599
0	0	0	0	0	0	0	0	34.0967	0
0	0	0	0	7.63359	0	0	0	9.42625	4.21052
0	0	0	0	0	0	0	0	62.8567	6.61375
0	0	0	0	0	0	0	33.8461	0	12.8141
0	0	0	0	6.46899	0	0	10.9312	23.6113	4.8969
0	0	0	0	0	0	8.12183	0	10.3448	0
0	0	1.69491	0	0	0	0	0	10.6452	4.96083
0	0	0	0	0	0	0	0	8.2569	4.11311
0	0	0	0	0	0	0	0	12.7273	0
0	0	0	0	0	0	17.3913	0	6.81819	5.51182
0	0	0	0	0	0	7.19425	0	20.8792	0.246306
0	0	0	0	0	0	10.4167	0	14.3443	7.03125
0	0	0	0	0	2.82776	0	0	15.4638	4.08162
0	0	0.757576	0	0	0	0	0	6.97675	10.1781
0	0	0	0	0	0	0	0	13.75	50.0001
0	0	0	0	0	0	0	0	8.02139	11.4836
0	0	0	0	1.75437	0	5.15464	0	0	0
0	0	0	0	0	0	0	0	40.4531	4.77387
0	0	0		0.787402	0	0	0	12.3656	4.12372
0		0	0	0	0	17.6871	0	0
0	0	0	0	40.9089	0	0	0	9.52377
0	0	0	0	0	0	0	8.87573	25.7576
0	0	0	2.81553	0	0	0	0	0
0	0	0	0	0	0	0	0	28.0701
0	0	0	0	0	0	0	0	13.4177
0	0	0	0	0	0	0	0	5.24935
0	0	0	0	0	0	0	0	12.9519
0	0.917431	0	0	0	0	10.917	0	13.1783	0
0	0	0	0	0	0	0	0	9.49868	31.2997
0	0	0	0	0	0	0	0	20.6185	6.77084
0	0	0	0	0	0	0	0	0	5.11509
0	0	0	0	0	0	0	0	5	0
0	0	0	0	0	0	0	0	15.0538	0
0	0	0.995025	14.0625	0	0	0	0	20.7693	0
0	0	0	0	36.9563	0	0	0	6.09137	0
0	0	0	0	0	20.6897	0	0	0	0
0	0	0	0	0	0	0	0	0	0
0	0	0	0	0	0	0	0	10.1563	3.03797
0	0	0	0	0	0	0	14.5257	7.2	5.89812
0	0	0	0	0	0	0	0	6.28931	0
0	0	0.347223	0	7.90815	0	0	0	5.75221	0
0	1.04167	0	0	51.9022	0	0	0	0	0
0	0	0	0	0	0	0	0	0	5.27638
0	0.729923	0	0	0	0	0	0	11.2779	0
0	0	0	0	42.2222	0	0	0	7.20339	0
0	0	0	0	0	0		0	11.8055	0
0	0	0	0	0	0	0	0	6.61158	0
0	0	9.29488	8.97428	0	0	0	0	0	0
0	0	0	0	0	0	0	0	16.3683	0
0	0	18.5897	0	0	0	0	0	17.8571	4.49735
0	0	0	0	0	0	0	3.28767	25.7576	5.03979
0	0	0	0	0	0	0	0	0	6.04397
0	0	0	0	0	0	0	0	15.3846	6.23306
0	0	34.5456	0	0	0	0	0	7.65027	9.09091
0	0	0	0	23.1579	0	0	0	10.951	4.94791
0	0	0	0	0	0	0	0	15.2047	0
1.263e-16	0	0	0	0	0.649348	0	0	76.3155	0
0	0	0	0	0	0	0	0	4.50699	0
0	0	0	0	0	0	0	13.1004	6.1425	10.7296
0	0	0	0	0	0	0	0	0	8.2822
0	0	0	0	0	1.40697	0	0	8.81459	4.31268
0	0	0	0	11.194	0	0	0	58.3333	0
0	0	0	0	0	0	0	0	8.6207	4.60704
0	0	0	0	0	0	49.5833	0	6.71835	4.92227
0	0	0	0	18.9782	0	8.75	5.0132	0	12.1287
0	0	0	0	0	5.11509	0	6.46388	8.72276	0
13.41	0	0	0	0	0	0	0	10.1523	0
0	0	0	10.1852	0	3.89609	10.828	0	34.2283	5.33333
0	0	0	12.5	0	0	0	0	13.2701	7.17948
0	0	16.1018	0	7.06322	0	0	0	0	5.74412
0	0	0	0	0	5.75221	0	0	18.1819	0
0	0	0	0	0	3.61758	0	0	10.2649	0
0	0.970873	0	0	0	4.34773	0	0	5.69621	0
0	0	0	0	0	0	0	9.52381	0	0
0	0	0	0	0	33.3334	0	0	12.9032	6.37118
0	0	0	0	0	0	0	0	16.5467	5.12821
0	0	0	0	70.2703	0	0	0	62.4992	4.40415
0	0	0	0	0	0	0	0	7.79944	0
0	0	0	0	0	0	0	0	10.8975	7.51295
0	0	0	0	0	0	0	0	25.1461	5.69948
0	0	0	0	0	0	11.0048	0	0	4.67533
0	0	3.91709	0	0	0	0	0	50.5102	0
0	0	0	0	0	0	0	0	16.6134	0
0	0	0	0	0	0	0	0	11.4442	0
0	0	0	0	0	0	0	0	7.04962	5.6266
0	0	0	0	0	0	0	0	10.8108	0
0	0	0	0	0	0	0	0	55.2623	0
0	0	0	0	0	0	0	0	13.143	0
0	0	0	0	7.53139	0	0	0	19.5489	21.6495
0	0	0	0	0	11.9565	0	0	0	3.38542
0	0	0	0	0	5.72518	0	0	0	0
0	0	0	0	0	11.1413	0	0	0.255102	5.34759
0	0	0	0	0	0	1.33097	0	10.7143	4.93507
0	0	0	0	0	1.21952	0	4.54546	7.98014	3.7037
0	0	0.709223	0	0	0	0	9.0062	8.27586	0
0	0	0	5.00003	23.0769	0	0	0	0	4.62962
0	0	0	18.1249	0	0	0	0	0	0
0	0	0	0	13.3064	0	0	0	9.64633	0
0	0	0	0	8.43984	0	0	7.29926	13.3159	0
0	0	0	0	0	7.80347	0	0	6.56109	0
0	0	0	0.961535	11.3793	0	0	0	26.9229	0
0	0	0	0	0	5.83554	0	0	10.7463	0
0	0	0	0	54.2854	0	0	0	6.43438	0
0	0	0	0	0	0	0	8.20513	9.52381	60.5186
0	0	0	0	0	0	0	0	5.06329	9.6104
0	0	0	0	0	0	0	0	0	6.12245
0	0	0	0	0	9.2233	0	0	22.7274	0
0	0	0	0	0	0.467289	0	0	23.5915	0
0	0	0	0	0	0	0	0	6.33334	0
0	0	0	7.00637	0	0	0	0	0	0
0	0	0	0	18.2922	0	0	0	24.4216	0
0	0	0	0	4.33213	0	0	0	0	0
0	0	0	0	0	0	0	0	34.7827	0
0	0	0	0	0	0	0	0	0	0
0	0	0	0	0	0	0	0	21.9321	0
0	0	2.8571	0	0	0	0	0	5.55557	0
0	0	0	19.0476	0	0	8.59373	33.3332	8.69565	3.74677
0	0	0	0	0	0	0	0	9.87122	27.0272
0	0	0	0	0	0	0	4.97077	35.4844	0
0	0	0	0	15.8879	0	0	3.03867	8.23171	0
0	0	0	0	0	0	0	0	9.02254	0
0	0	0	0	0	0	0	0	0	0
0	0	0	0	0	0	0	5.666e-17	12.5641	0
0	0	0	0	0	0	0	0	11.4094	5.68863
	0	0	0	0	10.0386	0	0	7.8481	0
0	0	0	31.3725	0	0	5.3872	0	15.7333	3.93701
0	0	1.85186	9.375	0	0	0	0	7.754	0
0	0	0	3.44827	0	4.86486	0	0	0	0
0	0	0	0	7.26496	0	0	5.68475	67.391	5.31646
0	0	0	0	0	0	0	0	12.459	0
0	0	0	0	0	0	0	7.7778	11.9171	0
0	0	0	0	0	0	0	0	9.67739	0
0	0	0	0	0	0	7.26743	0	34.0427	0
0	0	0	0	0	0	0	7.14287	9.9379	0
0	0	0	0	0	0	0	0	12.9199	0
0	0	0	0	0	0	0	0	0
0	0	0	0	0	0	0	8.88158	5.83756
0	0	0	9.40176	0	0	0	0	12.9534
0	0	0	0	6.52742	0	0	0	0
0.699304	0	0	0	0	0	0	0	6.07477
0	0	0	0	0	0	0	8.07754	0
0	0	0	0	0	0	0	0	0
0	0	0	0	0	0	0	0	8.1818
0	0	0	0	0	0	0	0	0
0	0	0	0	0	0.271002	6.68605	0	0
0	0	0	0	0	3.66198	0	0	0
0	0	0	0	0	13.0435	10.288	7.44683	12.4261
0	0	0	0	0	0	0	0	7.84314
0	0	0	0	0	0	0	0	5.862
0	0	0.787405	0	0	0	0	0	5.65553
0	0	0	0	0	0	0	0	0
0	0	0	0	7.36842	0	0	0	21.1481
0	0	0	0	0	0	0	0	10.5541
0	0	0	0	9.13979	0	0	0	5.76441
0	0	0	0	0	0	0	0	15.2284
0	0	0	0	0	0	0		0
0	0	2.94119	0	0	12.1018	0	20.5804	9.78724
8.15451	0	0	0	19.1436	0	0	9.3596	0
0	5.40546	0	0	0	0	0	0	9.3085
0	0	0	0	0	5.61496	0	0	16.4524
0	0	0	0	0	0	0	0	8.90585
0	0	0	0	22.5064	73.636	0	0
0	0	0	0	7.23271	7.52088	0	7.96916
0	0	0	0	0	0	0	0	13.1579
0	0	0	0	0	5.1852	0	0	21.5279
0	0	0	0	0		0	7.91558	0
0	0	0	0	0		0	4.81283	21.8188
0	0	0	0	0	0	0	5.67009	23.0306
0	0	0	0	0	8.1699	0	0	67.9996
0	0	0	0	0	2.42131	0	0	96.6663
0	0	0	0	0	8.88891	0	3.06906	28.7672
0	0	0	0	2.38096	0	0	10.4615	19.0323
0	0	0	0	0	0	0	0	4.26666
0	0		0	0	0	0	4.98615	9.27149
0	0	0	0	0	4.96895	0.703814	0	14.1361
0	0	0	0	0	0	0	4.02144	12.8834
0	0	0	0	0	8.13954	0	0	30.5086
0	0	0	0	0	0	0	0	13.125
0	0	0	0	0	6.79014	0	3.71622	18.4143
0	0	0	0	0	0	0	4.85714	16.9014
0	0	0	0	0	14.3564	0	0	14.2857
0	0	0	0	0	0		0	0
0	0	0	0		0	0	16.8068	9.74575
0	0	0	0		0	0	3.94737	0
0	0	0	0	0	0	0	4.70588	0
0	0	0	0	0	0	0	0	0
0	0	0	0	0	0	0	0	17.9551
0	0	0	0	0	0	7.56302	0	10.8375
0	0	0	0	0	0	0	0	0
0	0	0	0	5.7789	7.10902	0	0	16.318
23.0769	0	0	0	24.7619	0	3.37079	0	15.7479
0	0	0	0	0	0	0	6.3325	15.3509
0	0	0	0	0	0	0	0	60.0004
0	0	0	0	5.83756	0	0	0	46.1538
0	0	0	0	0	5	0	3.87596	0
0	0	0	0	12.9693	0	0	0	54.5463
0	0	0	0	3.88601	0	2.99727	0	52.4999
0	0.881057	0	0	0	6.50001	3.54431	0	16.5186
0	1.74418	0	0	7.19999	0	0	0	17.8218
0	0	0	0	0	3.58974	5.18135	0	23.2144
0	0	0	0	0	0	10.4545	0	0
0	0	0	0	0.321544	0	0	0	21.5873
0	0	0	0	9.09092	0	4.8433	0	19.2857
0	0	0	0	3.57143	0	0	0	0
0	0	0	0	12.5	3.66749	0	0	19.149
0	0	11.3095	0	11.194	2.70272	5.75342	0	15.9143
0	0	0	0	7.14285	0	0	6.47669	12.5731
0	0	0	0	6.94087	0	0	19.1709	15.0259
0	0	0	0	0	0	4.22527	5.24934	17.4999
0	0	0	4.81929	0	4.3257	0	6.77965	15.7897
0	2.81689	0	0	6.20916	0	0	0	14.8148
0	0	0	0	6.70555	6.16883	13.2911	6.05187	20.3882
0	2.43903	0	0	0	0	0	0	20
0	0	1.3158	0	6.95187	0	0	27.1978	15.9204
0	0	0	0	0	0	0	0	5.35714
13.6986	0	0	0	5.1447	0	0	0	0
0	0	0	0	0	4.36686	0	0	11.2583
0	0	0	0	0	0	0	0	10.0629
0	0	0	0	0	0	0	0	0
0	0	0	0	0	0	0	0	14.7826
0	0	0	0	0	0	0	9.16232	14.4928
0	0	0	0	0	0	0	8.57143	29.4642
0	0	0	0	0	2.84975	0	0	20.8955
0	0	0	0	0	3.63036	0	0	0
0	0	0	0	0	0	0	0	12.6582
0	0	0	0	0	18.3246	0	4.79042	10.6796
0	1.58103	0	0	0	3.19149	0	0.276141	17.4564
0	0	0	0	4.65753	0	0	0	29.1045
0	0	0	0	0	6.03015	0	0	40.6975
0	0	0	0	5.96205	4.41176	0	0	0
0	0	0	0	13.2813	4.60359	0	0	0
0	0	0	4.76181	0	0	0	0	12.1159
0	0	0	0	0	0	0	0	32.3528
0	0	0	0	0	0	0	0	29.7619
0	0	0	0	0	0	0	0	0
0	0	0	0	6.16882	0	0	0	18.3624
0	0	0	0	0	0	0	0	16.8103
0	0	0	0	0	0	0	3.90625	42.5532
0	0	0	0	3.14136	0	0	0	17.7966
0	0	0	0	0	0	0	5.10204	20.7691
0	0	0	0	0	0	0	0	0
0	0	0	0	0	0	0	21.039	9.47985
0	1.78571	0	0	0	0	0	0	20.442
0	0	1.69489	0	3.66667	0	0	0	52.9408
0	0	0	0	0	2.83286	14.4737	0	16.8068
0	0	0	0	0	0	0	0	32.3844
0	0	0	0	0	0	5.46219	0	17.4051
0	0	0	0	1.13477	0	0	0	9.38415
0	0	0	0	0	0	0	3.09278	13.9706
0	0	0	0	0	0	0	4.12371	0
0	0	0	0	0	5.47264	16.6666	0	15
0	0	0	0	0	0	0	0	11.7057
0	0	0	0	0	0	0	0	39.344
0	0	0	0	0	0	0	0	12.4567
0	0	0	0	8.52273	0	0	4.18848	25.0001
0	0	0	0	0	0	0	0	0
0	0	0	0	0	0	0	0	7.71703
0	0	0	0	0	0	0	0	0
0	0	0	0	20.5882	0	0	0	0.243309
0	1.37932	0	0	0	0	0	7.28643	20.4031
0	0	0	3.91062	0	0	0	0	27.7228
0	0	0	0	26.0867	0	34.2858	5.72917	25.8332
0	0	0	0	0	0	0	0	16.1539
0	0	0	0	0	0	0	0	73.6854
0	0	0	0	0	0	0	0	0
0	0	0	0	0	3.88348	0	0	9.90098
26.5151	0	17.1718	0	0	0	0	0	5.16305
0	0	0	0	14.1176	7.0529	0	0	9.2838
0	0	0	0	8.98202	0	0	5.57029	13.2308
0	0	0	0	3.57142	0	0	3.69393	0
0	0	0	0	0	0	0	0	68.9651
0	0	0	0	0	0	0	0	12.9354
0	0	0	0	0	0	0	0	17.3077
0	0	0	0	0	0	0	0	14.5038
0	0	0	0	0	0	0	45.7626	24.0741
0	0	0	0	0	0	0	9.23569	0
0	0	0	11.1111	8.58367	0	0	0	14.9484
0	0	0	0	0	0	0	0	10.8108
0	0	0	0	0	5.20833	0	0	0
0	0	0	0	30.769	0	29.7872	5.35211	13.9073
0	0	0	0	0	0	0	5.24935	8.73787
0	0	0	0	7.27763	0	0	6.49351	8.26211
0		0	0	0	0	10.352	3.08482	0
0	0	0	0	0	4.37019	14.9999	0	0
0	0	0	0	0	0	0		11.1111
0	0	0	0	0	0	0		11.6883
0	0	0	0	0	0	0		8.46153
0	0	0	0	0	0	0		8.55617
0	0	0	0	0	0	0		23.1156
0	0	0	0	0	0	0		4.04313
0	0	0	19.3547	0	0	0		10.4651
0	0	0	0	0	0	22.9729		19.1601
0	0	0	0	0	0	10.6145		12.4514
0	0	0	0	0	0	0		25.8334
0	0	0	0	5.76922	0	0		9.42411
	0	0	0	0	0	0		12.8906
0	0	0	6.81006	0	0	0		11.2821
0	0	0		7.73334	0	0		12.8535
0	0	0	0	0	0	0		0
0	0	0	0	8.55617	3.35052	0		15.6499
0	0	0	0	17.2152	0	0		9.76863
0	0	0	0	0	4.65116	0		0
0	0	0	0	0.366121	10.1828	0		11.0429
0	0	2	0	7.25001	0	0		0
0	0	0	0	0	0	3.75335		0
0	0	0	0	0	0	0		9.40765
0	0	0	0	0	0	0		7.98004
0	0	0	0	0	0	0		14.7727
0	0	0	0	0	0	0		17.8666
0	0	0	0	5.33333	10.7527	0		14.7945
0	0	0	0	4.18994	0	0		28.7499
0	0	0	0	6.46765	0	0		23.0519
2.94118	0	0	12.5	3.79747	0	0		0
0	0	0	0	5.30304	0	0		25.7144
0	0	0	0	0	4.9505	0		28.1938
0	0	0	0	17.6151	10.0257	0		8.66142
0	0	0	0		0	0		25.6345
0	0	0	0		0	0		15.0895
0	0	0	0	6.34329	0	0		0
0	0	0	0	0	0	0		20.1299
0	0	0	0	0	0	0
0	0	0	0	0	0	21.3592
0	0	0	0	0	4.29293	0
0	0	0	0	5.01394	0	0
0	0	0	0	0	4.16667	0
0	0	0	0	0	0	0
0	0	0	0	0	0	0
0	0	0	0	0	0	0
0	0	0	0	0	0	0
0	0	0	0	5.919	6.12245	0
0	0	0	0	0	0	0
0	0	0	0	0	0	0
0	0	0	0	0	0	0
0	1.11112	0	0	0	5.38461	0
0	0	0	0	0	0	0
0	0	0	0	0	0	0
0	0	0	0	0	0	0
0	0	0	0	0	0	0
0	0	0	0	0		18.8678
0	0	0	17.5926	0		0
0	0	0	0	3.33333		0
0	0	0	0	0		0
0	0	0	0	0		0
0	0	0	0	0		0
0	0	0	0	0		0
0	0	0	0	0		0
0	0	0	0	0		0
0	0	0	0	0		0
0	0	0	0	0		0
0	0	0	0	0		0
0	0	0	0	0		0
0	0	0	0	0		0
0	0	0	0	0		6.23306
0	0	0	0	0		0
0	0	0	0	0		0
0	0	0	0	0		0.345969
0	0	0.62112	0	8.59375		0
0	0	0	0	0		0
0	0	0	0	0		0
0	0	0	0	5.15022		0
0	0	0	0	0		37.9846
0	0	0	0	0		0
0	0	0	0	12.1622		0
0	0	0	0	34.14		0
0	0	0	0	4.97924		14.6154
0	0	0	0	0		13.308
0	0	0	0	0		0
0	0	0	0	10.8911		0
0	0	0	0	7.11465		0
0	0	0	0	0		0
0	0	0	0	0		0
0	0	0	0	0		0
0	0	0	0	6.15836		0
0	0	0	0	0		5.68475
0	0	0	0	0		0
0	0	0	0	0		8.71935
0	0	0	0	0		0
0	0	0	13.2451	0		0
5.17242	0	0	0	0		0
0	0	0	0	0		0
0	0	0	0	0		0
0	0	0	0	0		4.33673
0	0	0	0	0		11.5607
0	0	0	0	0		0
0	0	0	0	0		4.87805
10.828	0	0	17.3913	0		0
15.9362	0	0	0	0		0
0	0	0	0	0		0
0	0	0	0	0		0
0	0	0	0	15.3845		0
0	0	0	0	0		6.23441
0	0	0	0	0		0
0	0	0	0	0		0
0	0	0	0	0		0
0	0	0	0	0		0
0	0	0	0	0		0
0	0	0	0	0
0	0	0	21.2766	0
0	0	0	0	5.3719
0	0	0	0	5.39417
0	0	0	0	0
0	0	0	0	0
0	0	0	0	5.08907
0	0	0	0	0
0	0	0	0	0
0	0	0	0	0
0	0	0	0	0
0	0	0	0	0
0	0	0	0	0
0	0	0	0	0
0	0	0	0	0
0	0	0	0	0
0	0	0	0	0
0	0	6.55738	0	4.35898
0	0	0	0	0
0	0	0	0	0
0	0	0	0	0
0	0	0	0	0
0	0	0	0	0
0	0	0	0	0
0	0	0	0	2.76817
0	0	0	0	0
0	0	0	0	0
0	0	0	0	0
0	0	0	0	0
0	0	0	0	0
0	0	0	1.96079	0
0	0	0	0	0
0	0	0	36.5382	0
0	0	0	0	4.27135
0	0	0	0	0
0	0	0	0	0
0	0	0	0	0
0	0	0	0	0
0	0	0	0	0
0	0.534759	0	0	0
0	0	0	0	0
0	0	0	1.03093	0
0	0	0	0	0
0	4.16663	0	0	0
0	0	0	0	0
0	0	0	0	0
0	0	0	0	0
0	0	0	0	0
0	0	0	0	6.57277
0	0	0	0	4.32569
0	0	0	0	0
0	0	0	0	0
0	0	0	0	0
0	0	0	0	6.91825
0	0	0	0	0
0	0	0	0	3.10078
0	0	29.2684	0.662253	0
0	0	0	0	0
0	0	0	0	0
0	0	5.74325	0	0
0	0	0	0	0
0	0	0	0	0
0	0	0	0	84.9105
0	0	0	0	0
0	0	0	0	4.19948
0	0	0	0	0
0	0	0	1.92309	5.10204
0	0	0	0	0
0	0	0	0	0.27027
0	0	0	9.70876	7.14288
0	0	0	0	9.44616
0	0	0	0	18.5065
0	0	0	0	7.01299
0	27.3809	0	0	5.34759
0	7.38005	0	0	0
0	0	0	0	0
0	0	0	5.88232	0
0	0	0	0	0
1.00502	0	0	0	0
0	0.568176	0	0	0
0	0	0	0	0
15.6716	0	0	0	0
0	0	0	4.00003	12.6316
0	0	0	0
0	0	0	0	0
0	0	0	0	0
0	0	0	0	0
0	0	0	0	16.0839
0	0	0	0	0
0	0	0	0	0
0	0	0	0	0
0	0	2.77776	0	0
0	0	0	0	5.98503
0	0	0	0	0
0	0	0	0	0
0	0	0	0	0
0	0	0	0	0
0	0	0	15.3847	0
0	0	0	0	0
0	0	0	0	0
0	0	0	0	0
0	0	0	0	0
0	0	0	0	0
0	0	0	0	0
0	0	0	0	7.4236
0	0	0	0	0
0	0	0.243309	0	0
0	0	0	0	4.50001
0	0	21.4545	0	0
0	0	0	0	0
0	0		0	0
0	0	0	0	0
0	0	0	0	27.4512
0	0	0	0	6.91056
0	0	0	0	0
0	0	0	0	0
0	0	0	0	0
0	0	0	0	0
0	0	0	0	0
0.5291	0	0	0	0
0	0	0.97087	0	0
0	0	0	0	0
0	0	0	0	0
0	0	0	0	7.32881
0	0	0	0	0
0	0	0	0	0
0	0	0	0	0
0	0	0	0	0
0	0	17.3913	0	5.698
0	0	0	0	0
0	0	32.0517	0	0
0	8.97436	0	0	0
0	0	0	0	0
0	0	0	0	0
0	0	0	0	0
0	0	0	0	0
0	0	0	0	0
0	0	33.2586	0	0
0	0	0	0
0	0	0	0
0	0	0	0	9.38629
0	0	0	0	0
0	0	0	2.60869	0
0	0	0	0	0
0	0	0	0	0.404859
0	0	0	0	0
0	0	0	0	0
0	0	0	0	0
0	0	0	0	0
0	0	0	0	3.59897
0	0	0	0	0
0	0	0	0	0
0	0	0	0	0
0	0	25.9493	0	0
36.1549	0	0	0.854703	8.37989
0	0	0	5.26326	0
0	0	0	0	50.685
0	0	0	0	0
0	0	0	0	0
0	0	0	0	4.5977
0	0	0	0	0
0	0	0.403226	0	9.51087
0	0	0	0	3.38982
0	0	0	0	0
0	0	0	0	0
0	0	0	0	2.13333
0	0	0	0	0
0	0	0	0	0
0	0	0	0	8.17843
0	0	0	0	0
0	0	0	0	5.15463
0	0	0	0	0
0	0	0	0	0
0	0	0		0
0	0	0		0
0	0	31.8682		0
0	0	0		0
0	0	0		0
0	0	0		0
0	0	0		0
0	0	0		0
0	0	0		9.50413
0	0	0		15.1786
0	0	0		0
0	0	0		0
0	0	0		0
0	0	0		0
0	0	0		0
0	0	0		0
0	0	0		0
0	0	0		0
0	0	0		0
0	0	0		0
0	0	0		15.3846
0	0	0		0
0	0	0		0
0	0	0		0
0	0	0		0
0	0	0		4.89691
0	0	0		0
0	0	0		0
0	0	0		0
0	0	0		0
0	0	0		0
0		0		1.38888
0		0		0
0		6.12245		0
0		0		0
0		0		0
0		0
0		0		0
0		0		0
0		0		0
0		9.06738		0
		0		0
0		0		0
0		0		0
0		0		0.259702
0		0		0
0		0		0
0		0		0
0		0		0
1.11111		0		6.66666
0		0		0
0		0		11.3989
0		0		0
0		0		0
0		0		6.25002
0		0		0
0		0		0
0		0		0
0		0		33.3333
0		0		0
1.75438		0		0
0		0		0
3.80952		0		0
0		0		0
0		0		0
0		0		0
0		0		0
0		0		196.876
0		0		126.562
0		0		0
0		0		9.78264
0		0		0
0		0		0
0		0		10.7914
0		0		0
0		0		0
0		34.6939		0
0		0		0
0		0		13.8555
0		0		0
0		0		0
0		0		0
0		0		0
0		0		0
0		0		0
0		0		0
0		0		0
0		0		0
0		0		0
0		0		0
0		0		0
0		0		0
0		0		0
0		0.662252		0
0		0		0
0		0		0
0		0		0
1.06384		0		0
0		0		0
0		0		0
0		0		82.3533
0		0		0
2.70271		0		0
0		0		0
0		0		0
0		0		0
0		0		9.89401
0		0		0
0		0		0
0		0		18.9943
0		0		0
0		0		0
0		0		0
0		0		0
0		0		0
0		0		0
0		0		0
0		0		4.36507
0		0		0
0		0		0
0		0		0
0		0		0
0		0		0
0		0		0
0		0		0
0		0		0
0		0		0
0		0		0
0		0		0
0		0		0
0		0		0
0		0		0
0		0		0
0		21.9179		0
0		21.4285		0
0		0		0
0		5.78514		0
0		8.8496		0
77.6315		0		0
0		0		0
0		0		0
0		0		0
0		0		0
0		0		0
0		0		0
0		0		0
0		0		0
0		0		0
0		0		0
0		0		0
0		0		0
0		0		0
0		0		0
0		0		0
0		0		0
0		0		0
0		0		0
0		0		0
0		0		0
0		0		0
0		0		0
0		0		0
0		0
0		0
0		0
0		0
0		0
0		0
0		0
0		12.069
0		0
0		0
0		0
0		0
0		0
20.6278		0
0.787399		3.77908
0		0
0		0
0		0
0		0
0		0
0		28.4211
0		0
0		6.11109
0		0
0		0
0		0
0		0
0.331124		0
0		0
0		0
0		0
0		0
0		10.8434
0		0
0		0
0		0
0		0
0		0
0		0
0		3.11689
0		3.06122
0
0
0
0
0
0
0
0
0
0
0
0
0
0
2.94117
0
0
0
0
0
0
0
0
0
0
0
0
0
0
0
0
1.02041
0
0
0
0
0
0
0
0
1.40847
0
0
0
0
0
0
0
0
0
0
0
0
0
0
0
12.0142
0
0
0
0
0
0
0
0
0
0
0
0
0
0
0
0
0
0
0
0
0
0
0
0
0
0
0
0
0
0
0
0
0
0
0
0
0
0
2.27275
0
0
0
0
0
1.3158
0
0
0
0
0
0
0
0
0
0
0
0
0
0
0
0
0
0
0
0
0
0
0
0.440529
0.609754
0
0
0
0
0.909092
0
0
0
0
0
0
0
0
0
0
0
0
0
0
0
0
0
0
0
0
0
0
0
0
0
0
0
0
0
0
202.178
0
0
0
0
0
0
0
0
0
0
0
0
0
0
0
0
0
0
0
0
0
0
0
0
0.418411
0
0
0.769233
0
0
0
0
0
0
0
0
0
0
1.6949
0
0
0
0
0
0
0
0
0
0
0
0
0
0
0
0
0
0
0
0
1.26582
0
0
0
0
0
0
0
0
0
0
0
0
0
0
0
0
0
0
0
0
0
0
0
0
0
0
0
0
0
0
0
0
0
0
0
0
0
0
