# Supplementary figures and images for: Synergistic stabilization of microtubules by BUB-1, HCP-1, and CLS-2 controls microtubule pausing and meiotic spindle assembly
Source: eLife journal article supplement (doi:10.7554/elife.82579), 2023-02-17

TOGL2

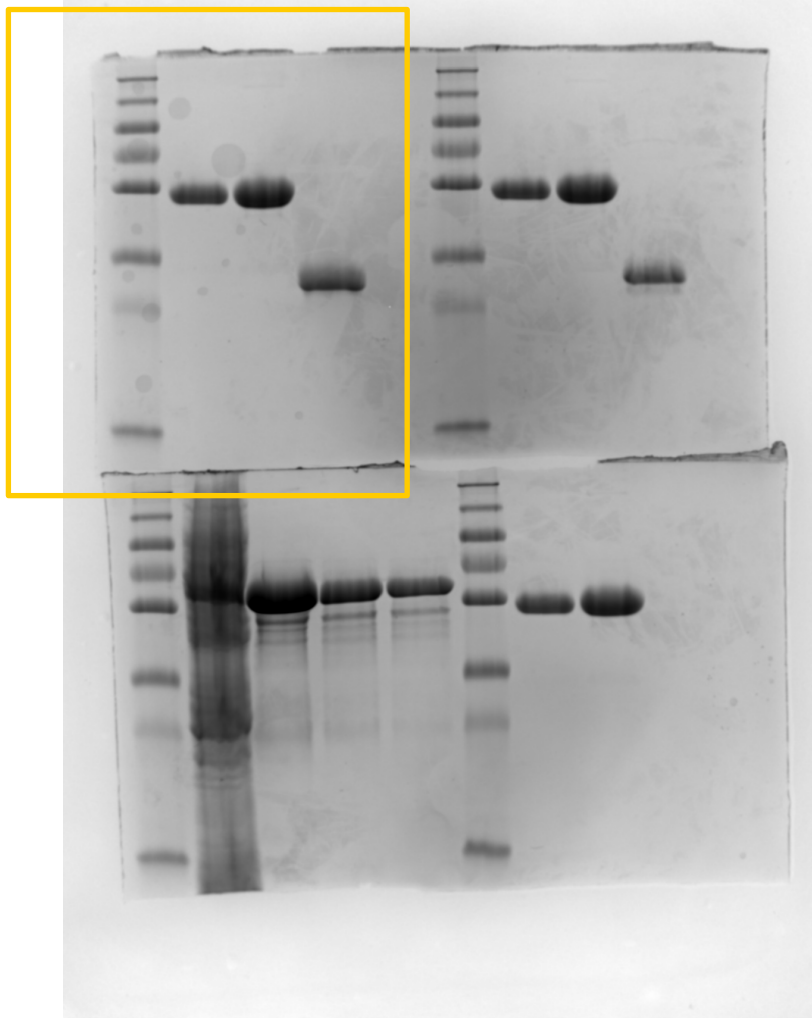

TOGL3

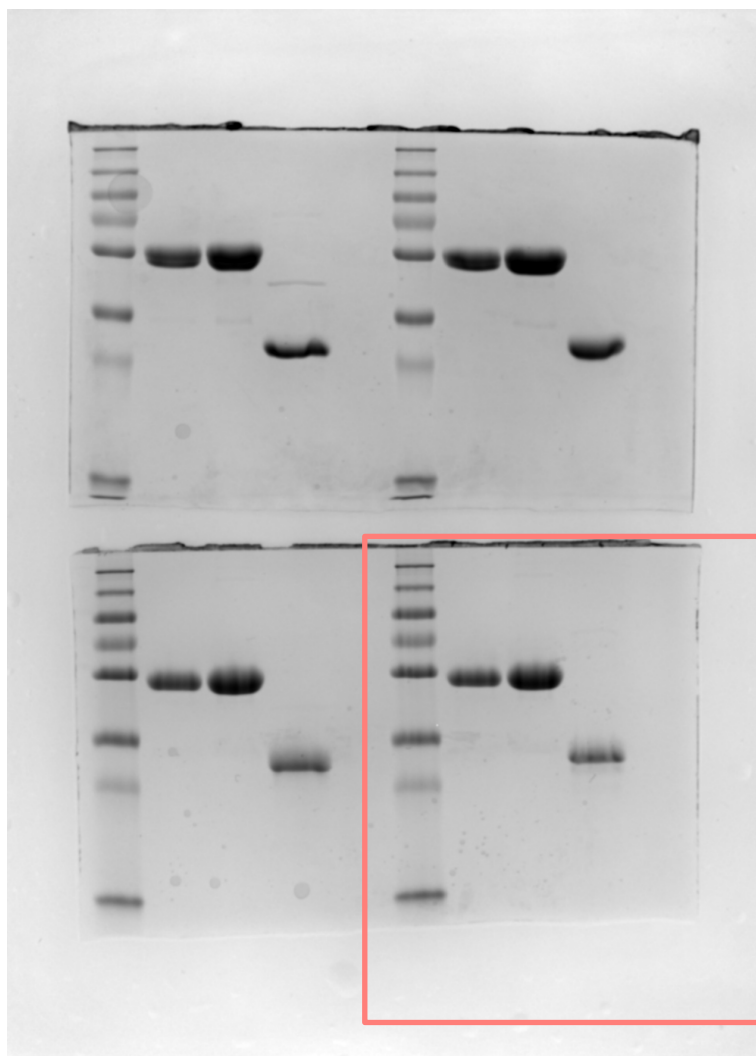

Supplement: fig6-figsupp1-data2 [file GF_TOGL2_TOGL3_annotated.pdf › Figure 6—figure supplement 1—source data 2/GF_TOGL2_TOGL3_annotated.pdf]
